# Supplementary material for: CRISPR-Cas9-based repeat depletion for high-throughput genotyping of complex plant genomes
Source: Genome Res. 2023 May;33(5):787–97. doi: 10.1101/gr.277628.122 (PMC10317117; doi:10.1101/gr.277628.122)
Supplement: Supplemental Material [file supp_gr.277628.122_Supplemental_File_S1.xlsx]

## Sheet: Legend
Supplemental File S1. Sequences of L. culinaris repeat-specific gRNAs utilized in the study.
The custom gRNA set was designed by JumpCode Genomics against the repetitive regions of the L. culinaris reference genome as described in the Methods section. gRNA target sequences in the L. culinaris genome are reported according to the gRNA subdivision in the 11 pools. For each gRNA, the tables reports also the number of targets in the genome and its relative frequency in the pool, namely the r…

## Sheet: Guide Pool 1
gRNA target sequence	number of targets	Relative frequency
TACTAAGGAGTAGTTTACGG	38	1.46154
ATAGGCAAGCTAAAACGGAA	38	1.46154
GTATCAACAGGCCTGATAAA	38	1.46154
TTATGTATTGAGCGGAAAAC	38	1.46154
AGAAGAGAGTGAAGCAAATA	38	1.46154
GGGATTTTGGGAAAATCCCT	38	1.46154
CTTTCTTTTTATCATCTGCT	38	1.46154
AGTTCCGGTATCCCGTCCTT	38	1.46154
TACAAAACTTTGAAGGAAGG	38	1.46154
TGTTGATAGTTGTTGATAGT	38	1.46154
ACTTGGTCTAATGTACGATC	38	1.46154
TTGTTAGGAAGTTCTTCCTC	38	1.46154
GGCTGGATTTCAAAAGTTTA	38	1.46154
TTCTTTGAAATTACACAGAC	38	1.46154
TCTTTGAAATTACACAGACT	38	1.46154
CTTTGAAATTACACAGACTG	38	1.46154
CACAGGCACTCACTTACACT	38	1.46154
CTCACTTTCAAACAGCTGAA	38	1.46154
CATGAAAACAACCGAATGGA	38	1.46154
GATTAGTTCATGCAATGTTA	38	1.46154
GGGGGATATCAGATAAATGG	38	1.46154
GGAGTCGAAATAAGGTTGAA	38	1.46154
GGAACAGGCGCCACCTCATG	38	1.46154
CATTTGCACAACAAGGGTTT	38	1.46154
TTATCATAGGCAACATCGAA	38	1.46154
TCAGAACATGGTCCAAAACA	38	1.46154
CGGGGAATAGGATCCTATCG	38	1.46154
AACTAACTTTGGTTTCGACT	38	1.46154
AGGAATAATTGATTTTGCTG	38	1.46154
TGAGGAATAATTGATTTTGC	38	1.46154
TCATCATCCCACACCCAAAG	38	1.46154
CTATGAGTATTTTGGTTGTT	38	1.46154
TACCACTCTGTCCCGTGTGT	38	1.46154
GGCTAGCCCTGTTCAAATCT	38	1.46154
TATAACACAATAGTTGAGCA	38	1.46154
GACTAAGGCCATTAGGTGTG	38	1.46154
AGTTTTGAGGTGAAGGTTTT	38	1.46154
GCAGATTGAAAGAAGAAGTT	38	1.46154
AGACTCAAGAGTATCCTTTT	38	1.46154
AGGTATTCTAAGGGTAATGA	38	1.46154
GGGTTGAAGGAAGTCTTGAG	38	1.46154
TTCAATACCACTGATCTCTG	38	1.46154
GGATCGTTAGATGAGTTATT	38	1.46154
ACATTAGACACTTGGCCGAA	38	1.46154
CTTTGAGGGAAAGGAGGTGG	38	1.46154
CTGAGCGAGGGCGAGAAAAT	38	1.46154
CAATATTGGCAATCCATTCA	38	1.46154
GGAAGGATCAACCAATTGAA	38	1.46154
TGTTTTAAAGATTTGGGTTC	38	1.46154
AGGTTGAAAGATGGCTCACT	38	1.46154
TTGGGTAAAACGTAGAAATT	38	1.46154
TGGGTAAAACGTAGAAATTA	38	1.46154
TTGCCTGGACCCGCCCTTTC	38	1.46154
ACCAGGAGTAAATGCCATCT	38	1.46154
AGAGTTCGACATGAAAGATC	38	1.46154
ATCCTAATGAGGCAACCTGA	38	1.46154
CCGTCCATTCGGCTATATCA	38	1.46154
TTACTCACCGTAATTCCCTC	38	1.46154
TTTCACCTTCAAATCACGAA	38	1.46154
GTAGGAATCAAAGTTAAGGG	38	1.46154
TAGGAATCAAAGTTAAGGGT	38	1.46154
GTATGAGATTGAGAAGTGGC	38	1.46154
AATATTGGATGGAGCAAGAA	38	1.46154
GGGAATAATTGACTTTTGCT	38	1.46154
TGTTTGCAGCAGTGCAACTG	38	1.46154
GCAATATACCTTGGCCTCTC	38	1.46154
AGCAATATACCTTGGCCTCT	38	1.46154
CTGAGCGAGAGAGCGCGTAC	38	1.46154
TGGCCCTAAGGTAAGGATCA	38	1.46154
GATGGCTCAATCCTATTCAA	38	1.46154
TTACTTGTGATGTGTATGAG	38	1.46154
AAAAGGACCCAAGAAGATGT	38	1.46154
CCCCTCGAGTGAAGAGGCAC	38	1.46154
TAGAGCTTCATCAATGGTAT	38	1.46154
TTCTTCTTGATAATCCAAAG	38	1.46154
GACGGTGGTCGTGCTGGTTG	38	1.46154
AGTGCCCAAGAAAGATGGTA	38	1.46154
CTGATGACCCTTTCTCAGCT	38	1.46154
AATGCTGTGTATGGACAAAG	38	1.46154
CTGGCTGTTGATAATGGAAT	38	1.46154
TACCATTGGTAGACTAATTT	38	1.46154
AGGACGTGGTTTCCCGTCGA	38	1.46154
TTCTTCGTCGCAAAAAGCCT	38	1.46154
GGTATCCTATCAACTTTCAC	38	1.46154
TGGACGAGGGATAACTATTG	38	1.46154
AGTTCATGAAATTGTGCATA	38	1.46154
GAGGCTGTTATTTGGTGGCT	38	1.46154
ACATCACCAATAGGTCATTT	38	1.46154
ATACTAATCCTCCTTTCTTC	38	1.46154
ATGTTCCTTGTAATAAAGTG	38	1.46154
AACTTCGACATATCTGTAAG	38	1.46154
TGGTCCTACAAGGATATGCC	38	1.46154
CTGTCCCAACACTTGAAACT	38	1.46154
ACCCTAATGTTGTCATACTT	38	1.46154
TCCCAAGTATGACAACATTA	38	1.46154
AAATGATGTGTTACAACTGT	38	1.46154
TGTGTTGTATGAGTAGTGTT	38	1.46154
TTTTTTTGGTCGAACTACGA	38	1.46154
GGTGGAACAAGGCCAACTGC	38	1.46154
AGTTAACCCTATGCGTTAAC	38	1.46154
CCTGCTGAAAGAAATTCGAC	38	1.46154
TGGCATAAAAGGCTTGGAAA	38	1.46154
TATGCTTTGTATTATGCTCA	38	1.46154
GAAGCAAGCTGGACATTTAT	38	1.46154
ACAAGAAAGCTATCCAGTTT	38	1.46154
GATTGGTCTGCTCTTCCATT	38	1.46154
CGCAAGGATACACCTTTAAT	38	1.46154
TCCTACTTCAAGGCTCGAAG	38	1.46154
GGTCAAATTTGAGGTATTAC	38	1.46154
TCTACCACAAGGTGATCCCA	38	1.46154
ACCCGAACAAATGTACCTTT	38	1.46154
TCAGCCAAAAGCACCTGCCA	38	1.46154
TTTCGCTCTTTCCCTTCCTT	38	1.46154
TGAAGCACCACTATAATACC	38	1.46154
CAAAAACCTTGCCTCCTGAT	38	1.46154
GGACAGTTCTATCTCTCTAA	38	1.46154
GAGTATCAGCCAAAGAAGAT	38	1.46154
TACACATGATTAGGAAAGGT	38	1.46154
CGCAAAGCAGTTGAGGAAGT	38	1.46154
TAACGATTTTCTGGAAGTGA	38	1.46154
GAAGCAGTGTTGGGTTTTAT	38	1.46154
TGTAGGGAGCTGAAGATAGC	38	1.46154
ACAAAAGCACTCTCTAAAGT	38	1.46154
ATGTTTGAATGAGGTCCAGA	38	1.46154
TGAAGTTATTTTTGGTGTGT	38	1.46154
CCAGGGAAATTAGAAAAAGT	38	1.46154
CCTACTTTTTCTAATTTCCC	38	1.46154
GTCGGTCTGAAATCAAACAT	38	1.46154
ACACTTACTTTTGGTTTGCG	38	1.46154
CCCATTACCAAGCTGCTGTC	38	1.46154
GGGGACGTTGCTGAAGTCCA	38	1.46154
AGAGAAGAGTGAATTAAGGA	38	1.46154
GAGCATGATGAACTGTTTTT	38	1.46154
GGGTTTGGTGATTGAGGGGG	38	1.46154
GTGTATATGAAGTGTTCACA	38	1.46154
CTTATTCTGGTCGTATCGGA	38	1.46154
TGTCCCAATCTCCTTTGATT	38	1.46154
CTTCCTTAAAGCTGAAAAGT	38	1.46154
TAAGGTTCGCGGGTCTCTAC	38	1.46154
ACTAGAAACCAAAAGGGGAA	38	1.46154
CAAAAGGACAAGAAGAACTA	38	1.46154
TGAGGAGGAGGTGGTGGTGG	38	1.46154
TGCTTCAACATCAGAGATCT	38	1.46154
GACTTAATGGATCAGTTAAT	38	1.46154
GAGGTGCCGTTTGCGGCGTT	38	1.46154
TTGGGCAGTTCGCTGAGCAA	38	1.46154
GTTGGAAAAAGTTGCATATC	38	1.46154
GCAACTCTCCCTGTTAGAGT	38	1.46154
TCAAATTAAGGTGTTTGGGA	38	1.46154
ATTTGGTGGATGGAACTAAA	38	1.46154
CGTAAACAAATTGGCACACC	38	1.46154
GGTATACTTTTCTTAGAGGG	38	1.46154
TGCAAATTAGAGAGTGACGG	38	1.46154
TGCTATGAAAGGTGTTCACA	38	1.46154
GGTCCATATAACACATCTTA	38	1.46154
GATTTTACTGTTTTTCCAGT	38	1.46154
GGGGGCATGTGGTACGCGTA	38	1.46154
ACTTCCTCAGTTGAGATATG	38	1.46154
ATGTCAAAATCCAAAGAAAG	38	1.46154
TGATTGACTGTGATATCTTG	38	1.46154
TGTTGGAATTTGAAGAGTTG	38	1.46154
ATTCCAACCAGTTCATCCCC	38	1.46154
ATTCTAGACAGAATCAGAGA	38	1.46154
TCAGATCTTGGAAAGGATAG	38	1.46154
AGCAAGACTCCTGAGACAAG	38	1.46154
GGAAACCCTTCATCCCAATT	38	1.46154
CGTCTGGCTTCCATTTGCCA	38	1.46154
GTCTGGCTTCCATTTGCCAT	38	1.46154
AAATGAGGTTTCAAGATTAG	38	1.46154
ATTTTGAGGCATGAGGCTAA	38	1.46154
ATAAAAATTGGGCGCAGCTC	38	1.46154
TCATGAAATAGAGATGAATG	38	1.46154
TTGAATATATCTCTTGATGG	38	1.46154
TCACGCACTGCAAGAGGCAC	38	1.46154
TCCAGCCACATACTACTGAT	38	1.46154
TCCTATCAGTAGTATGTGGC	38	1.46154
GGTCTAGCATACGACCCCTT	38	1.46154
GTTGGTGAGGTTATCAGAGA	38	1.46154
TCATCTCAGATTCTTCATCA	38	1.46154
TGATGAAGAATCTGAGATGA	38	1.46154
AATTAGGATAGGGATGTTGT	38	1.46154
GTTGCTTCCCGAGCGTGGAA	38	1.46154
TGTGAGTATTTTGTAGATTG	38	1.46154
GTAGCTTGGGGAGGAGTTGC	38	1.46154
GATTCAATCGAATTTGCATG	38	1.46154
GATTTGTTTAGTTCAGATGT	38	1.46154
ACCATAGTTCTCCACTTCTT	38	1.46154
GCTTGATTTTACCTTGACTT	38	1.46154
AAGGACAAGATAGAAGATGA	38	1.46154
CAACAGGAGGTACTGTGGTG	38	1.46154
GAGGCCTTTCCAAGCACCGG	38	1.46154
AAATCTGGAGGTCAAATTTT	38	1.46154
CTCGTATTAGAAATCATCTT	38	1.46154
AGCATTGTGTCTATGCCCGG	38	1.46154
GGGAAACGTTTGAGATAGGA	38	1.46154
TTTCGACAATCTGAGACTTG	38	1.46154
CATTCTATTAGCCATCGTCT	38	1.46154
GCTTGGTAAAGGCCTCCTTG	38	1.46154
TTACATTGTGAAAGCATGAC	38	1.46154
AGATTCTTGAAAGAACACTT	38	1.46154
TTGAAAGGTGTTTGCACAGC	38	1.46154
GTGAGGTTGTTCTTATGTTA	38	1.46154
AACTCCAAACCACCTTGGAG	38	1.46154
GAAAGGTCTTGTGGACAGTT	38	1.46154
GGAAGTTGTGTTGCCAATAG	38	1.46154
TTCAAGTGTGGAAGAAAGAG	38	1.46154
AAGGCTCTTTTGCTTGAGAA	38	1.46154
GCCTATTGGGTTATATCCGA	38	1.46154
CATTTTCTTTGAAAATGCAG	38	1.46154
CATCCTCATTATCTTGAGGA	38	1.46154
AATCCATCCTCAAGATAATG	38	1.46154
AATTTCTGGAGCAATCTCAG	38	1.46154
TTGAAAATGGCAATAGGAAA	38	1.46154
CCCAGCAAACAGCTGTAAGC	38	1.46154
TTCCAAGATTCCAAAACACT	38	1.46154
AATTACTTGTCGGTTAGTCT	38	1.46154
GGCACCCGTGGCGGTTAGAT	38	1.46154
CGACATGCTTTTGACATAAG	38	1.46154
GCCTTTCAAAAAACGCATCT	38	1.46154
GAAAGTTTGACAGTTTGGAG	38	1.46154
TTTAGGACTGTTGAGGTTTA	38	1.46154
TTTTGGGTCATATGAGTGTT	38	1.46154
GGATGGCGTGTGGTTTGGCA	38	1.46154
GCAGAGGGAATCGTTTCTTC	38	1.46154
GGATAGGTGGTATCCTCCTA	38	1.46154
TGCTGCTGTTGTTGCTGATG	38	1.46154
ACCGCCATCTTTTAAGTTCC	38	1.46154
GCAGCCACAAGATCCGCTAG	38	1.46154
AGTTTGAGGAAGTCAGTATT	38	1.46154
ATCGACACAGGATATGGTCT	38	1.46154
CTCCCAAGCCTCTTTAGCAA	38	1.46154
TCTTTGTCTTTGATCTTTGG	38	1.46154
CATCATTTTTCATTTCCCGT	38	1.46154
ATGGAGAAGGTAGCTCGCTG	38	1.46154
TCAGTATTCTCCTTTATGGA	38	1.46154
AAAATCCCGGGAGCGACATA	38	1.46154
CATCAAATTCCCTTTTTTGT	38	1.46154
GCCATAGACAAGGGAGAAGG	38	1.46154
TCAGACAGAAGAGGGACACT	38	1.46154
CAAGAAGGAGGTAAAGATAG	38	1.46154
GTAATCAACACATAGCCTCA	38	1.46154
GAAGTTTCTGATCCATTCCG	38	1.46154
CAGAATTTGTGCATATCTGA	38	1.46154
TTCTAGGTACCTCGACCATA	38	1.46154
TGATGTCGCTTCTACCCACT	38	1.46154
AAGAATTGGTGAAGTGTGAT	38	1.46154
AAGAGGAACAGTACTAGGGC	38	1.46154
TCATTCAAAAGGTGAGTTTG	38	1.46154
GTGGAAGAAACTTTGGAGAT	38	1.46154
ATAATTATCGAATGAGCAGC	38	1.46154
GCCAGAGCCTGATTCTCAGT	38	1.46154
TTTTCCTTTAGAAGATCTGC	38	1.46154
CATCTAGAAGCTATGCCAAT	38	1.46154
TCACCGGTGGTGGCGCCTTC	38	1.46154
ATTACCCTGAGTTTCAGTCG	38	1.46154
TATTCAACATCATGTTGACA	38	1.46154
TTGATCCTTCTAAGACGGTA	38	1.46154
ATGGAGACACACTTTACAAG	38	1.46154
GTTCCAACATTCTCGGCATT	38	1.46154
GATTAGTATGTAGGGATTTG	38	1.46154
GTTGAAAATGGCAAGAATGA	38	1.46154
TACGACAACGTCACCGGTTT	38	1.46154
GGGGTTTTTGAGGTTTGGGA	38	1.46154
TAGGTCATTCTCATGACAGC	38	1.46154
GCGCTCCGCTGGGGATTTGA	38	1.46154
TTCAAATCCCCAGCGGAGCG	38	1.46154
GCTTCTGCCAGCTGTGATGC	38	1.46154
TTGTCCACCAGATGTAGAGC	38	1.46154
ATTGGTTTTTTGCCTCCTCA	38	1.46154
GAAAAGGAACGCCATGAGCG	38	1.46154
TTACACGAGAGAGGGATATG	38	1.46154
CCATGGTCATTCTCTATGTG	38	1.46154
TTGAGCAACCCCATAAGGTG	38	1.46154
AACCCCATAAGGTGAGGTGA	38	1.46154
AAGGCACTATGCTAGGTTCA	38	1.46154
TCAAAATAAAGGCGTTCGGG	38	1.46154
TGGTACGGAGGTTGTTGTCG	38	1.46154
TTGGTGGAATGATTGTTATA	38	1.46154
AGTTTCTCGGATTTCTTTTA	38	1.46154
CTTTGTAACTGAGCCCGAGT	38	1.46154
TGGAGACCTTATCTCGGAAC	38	1.46154
ATGATAAGGTGAGGTTTTAA	38	1.46154
GAATTTGGGGAAATTTTTGA	38	1.46154
GGGATGGGGCCCTGACGGAC	38	1.46154
CTGCTCCCTAGGCATCATGA	38	1.46154
GGCGAGAGCTTGGCATTTTT	38	1.46154
ACTCGTCAATCCTTTCAATC	38	1.46154
CTGCTGATAGAAACTACTTG	38	1.46154
GATTCAGAGTGCTCTGACAA	38	1.46154
AATTGAAGTTTCAGAGCAAG	38	1.46154
CATAGGCAGTTGCAAACTTT	38	1.46154
TTTGCAAATACAAGAAATGG	38	1.46154
ATATGTAAGTGCATGAGAAA	38	1.46154
CAGTTAGGGTTAGGGGTGTT	38	1.46154
AGGCTCAAGTCAACTCGTTA	38	1.46154
TGTCGTACAATCGCCCCAGA	38	1.46154
GTAAAAGGAGTGACCCTCCT	38	1.46154
AATGGAAAGGTGACATGATT	38	1.46154
TTAATGAGCCTTAATGCTAA	38	1.46154
TGGTTAAGTGTTTGTGTGTT	38	1.46154
TGATGAAGCCAAAATGGAAA	38	1.46154
CCTTTTGACATGAAGAATGG	38	1.46154
CCACCATTCTTCATGTCAAA	38	1.46154
TGAATATCCCCTTGATTAAA	38	1.46154
AATCTTCTCTTCGATTGCTT	38	1.46154
ATCTTCTCTTCGATTGCTTT	38	1.46154
TCATGCGCTTTTCTTCAATA	38	1.46154
GATCCACTAGAGTTTTCAAA	38	1.46154
CTCGGTCAAAGAGACTCTCG	38	1.46154
AGCTACTAAACCAATCGAAT	38	1.46154
GTTGACTATGCTTCAGAAAC	38	1.46154
GGGTGAAAAATGTGTTTGAT	38	1.46154
TTGCAGTGTTCGCGGCGCGC	38	1.46154
ACATGATAATTTCATCACGA	38	1.46154
GTGACGGTAGCAATCTGATG	38	1.46154
TGTCTCCATCAAAAGTCTTA	38	1.46154
AGGGTTGGCACAACCTGCTT	38	1.46154
TCTTCCAGTAGTTCGGTCAG	38	1.46154
TGTACTTTTGGGGTCCAATC	38	1.46154
ATTTTGCATTTTGAGGCTTA	38	1.46154
GTTTGGACTTTGAAGTTTAT	38	1.46154
GTTCAAAGATTTTTGTGGTT	38	1.46154
AATAATATCACACCCCTGAC	38	1.46154
ATAGTTGCTGCATAACGGTA	38	1.46154
CTTCTACTTGGTACAACCGG	38	1.46154
CACTCCGGGTGTCACAAAGC	38	1.46154
GTTTCGATTGATTCTTCATG	38	1.46154
TTCTTCTTGATAATCGGAAG	38	1.46154
ATATATATTGATGTGGGACG	38	1.46154
AGACGAATGCAGTCTCTAAC	38	1.46154
CTCAGGTTGTCTAATCTAAT	38	1.46154
ATTAGATTAGACAACCTGAG	38	1.46154
AGACAACGTGCAAACTCCAA	38	1.46154
CCAGCATTTTTCAACCCAAA	38	1.46154
GTAAACAGAAGTTCATAGAT	38	1.46154
TTGGTAATGATGGTGAAGTG	38	1.46154
AAATCATCAATCCTCAGTAA	38	1.46154
CAGGTATGATGCAACCATTG	38	1.46154
GCGTTGAGTTACGTGCTTAT	38	1.46154
CTGAGCTTTTGCTTCACTGG	38	1.46154
CACACACAAGGTCCTAGACT	38	1.46154
TGTAATGGGAACAAAGTTTA	38	1.46154
TCAAAAGTTTTAGGGCAAAA	38	1.46154
ACAATTTGCCATTTAGGCCA	38	1.46154
TCGAATGGAGCCGAAGTGAT	38	1.46154
GGGATGGGTTGTAAAGGTTT	38	1.46154
GGAGTCGGCTCAAAGCAAGT	38	1.46154
CATTGTTTGGTAGGGGTGGG	38	1.46154
AACCTTGGAGAGAAGGTTAA	38	1.46154
GTCATTATTGATTACCTCCT	38	1.46154
CGCCTGAGCTTCTGCTTCAT	38	1.46154
GACGAAATTCATCACCCCTT	38	1.46154
CGAAACAAAGGTTGTTGGGT	38	1.46154
AAGATGACGTGCCAGGACGG	38	1.46154
AAAAGGACAAGAAAACATTG	38	1.46154
ACAGTTCGCCAATTTTCTCA	38	1.46154
CTTTTGCACACAAGAGTGGA	38	1.46154
GGCTATTGATGCTTGGAGGA	38	1.46154
CCACTGAAGGTAAGGCTCAT	38	1.46154
CTATGAGCCTTACCTTCAGT	38	1.46154
CCTATGAGCCTTACCTTCAG	38	1.46154
CAACTTGGTTTCCCTATGAA	38	1.46154
AAAACTCCGCTGGAGATAGG	38	1.46154
TTTGAGATGTACTCAAGACT	38	1.46154
TCCTGTCCCTGTTACTTCTA	38	1.46154
TCACGGCCCTACCTTAAGTG	38	1.46154
AGCATGTTGACTCGCTGGGG	38	1.46154
TAACAGAAGGTCCCCCCACG	38	1.46154
AGTAGCTTTTTGGTGATTTT	38	1.46154
AGAAATTGGGGCACATGAGA	38	1.46154
TTTTTGGGACAGTTTTGTTT	38	1.46154
TTTTGGGACAGTTTTGTTTT	38	1.46154
AGTTGATTTCAGAGGAAGCT	38	1.46154
GGGACCGGCTATAAAGTCCC	38	1.46154
GCAGGGAAGTTGTTGAGCAC	38	1.46154
CTAAGCAAAGACCAACCAAG	38	1.46154
AACTCATCATTAGGGATTTT	38	1.46154
AACTGGAACAATCTCTTCGA	38	1.46154
ATCTTAGACTTTTTGGAAAG	38	1.46154
TACTGCATTGGCGATTTCCA	38	1.46154
GTCTTTCTTCATTTGCATAA	38	1.46154
AGGGGTTATGAGAGAAAGCA	38	1.46154
TATGATATGGTGCATTGGGA	38	1.46154
ATAGGATTATCCTGTACATT	38	1.46154
GAATATGGGGCCCAATGTAC	38	1.46154
TATCATCTTGCTTTATGTCG	38	1.46154
GCCTATGGTTTGGTCTTTAG	38	1.46154
AGCAGAGGCAGACAATGGAT	38	1.46154
ATACAAGCAGAGGCAGACAA	38	1.46154
TGGTATAACCGCTTTCATGA	38	1.46154
AAAGACACCTTTCATAGTGG	38	1.46154
TGACACTCAAAATGGAAGAA	38	1.46154
GAAAGAAACATGAAATGCTT	38	1.46154
TAAATGGCTCATTGTAAAGA	38	1.46154
AGAAGCATCCAAGCTCTGAT	38	1.46154
AAATCTTCCCAACATGAAAT	38	1.46154
CTGGATGGGAATTGCATCAA	38	1.46154
GACTGTCAAGGGTTTTCCAA	38	1.46154
GTTTTGAAGATTTGAGGTAG	38	1.46154
ATTAGGCAAAGTGATGAACT	38	1.46154
CTCAATGCAATGTTTCTTAA	38	1.46154
GGATTTTCGAATTTCTTCAT	38	1.46154
ACCTTTCTGAACAATCTGTT	38	1.46154
TGTCTTATAATCGTCCAAGA	38	1.46154
CCAGGCTGCGCCGACATCCT	38	1.46154
TCATCCTCTGGAGTGTACTC	38	1.46154
AAGTGGTTCTTCATAATCTC	38	1.46154
TTACTCAGTCGGATATCTCT	38	1.46154
GTAAAGACAGGAGCATTTGG	38	1.46154
ACTGATGAAGGACCGTGACT	38	1.46154
TGGTTTCAAAAGCAAGATCA	38	1.46154
GGTCTTTTTGCTGTCAAAAA	38	1.46154
GATTGCAAAATCCCACACAG	38	1.46154
TTCTCACTCGAATACGGGAC	38	1.46154
CAGGATGGAATAGCATGAAC	38	1.46154
CCTGGGCTGCTAAAAGATTG	38	1.46154
ATATAACAAACACACCCAAA	38	1.46154
TTTGGAGAGGTTTTGGGGTT	38	1.46154
TAGGGTTGACCCGCTTATTA	38	1.46154
GTGCAAAATCTGATGGATGA	38	1.46154
AGATCCTCAGTAGAGTTGGC	38	1.46154
AAGATCACAATCAAGAACAA	38	1.46154
AGAGACTAGGGTTTCTAGTC	38	1.46154
AGATGTCATGACATTCAGGA	38	1.46154
TTGAGCACCAGAAAGCCTGC	38	1.46154
TATTAAGGTCGGGAAGATTC	38	1.46154
TCCACGAGGGATGATCTCTG	38	1.46154
CCACGAGGGATGATCTCTGT	38	1.46154
CCCACAGAGATCATCCCTCG	38	1.46154
AACTAACTTGGAGAAGCCTC	38	1.46154
ATAACTCAACCTATGCATTC	38	1.46154
GTTAACAGTGCTTGAAAATG	38	1.46154
TTGATGTCGGTATGATGATT	38	1.46154
ACCATATACCAACGAGAAAG	38	1.46154
CTCCCCACTTAGGAAGAACT	38	1.46154
GAAAGAAGTACGTGGTTTCT	38	1.46154
TCTTTCTCAGTCTTTGGCTC	38	1.46154
CGGAGGCACTTTCCATCTCA	38	1.46154
TTGCAAATTCAAGAACTACG	38	1.46154
TAAAGGTAAACTAAGGTCAT	38	1.46154
GTTAGGTATGAACTGGTTGA	38	1.46154
CTTCTAAACCAGTAGTGTTC	38	1.46154
CTGCCATGTGCTTCTGTTAT	38	1.46154
ATCTCACTAAATCCCCTAAT	38	1.46154
TGCTGGATACTGTTGTTGAT	38	1.46154
AGAAGAGGCTGACGATTGGT	38	1.46154
GTATTATGCTCCGTATGATG	38	1.46154
AATAGTACCGGTGCACCCCA	38	1.46154
GGAAGGTTTACAGAAAGCTT	38	1.46154
TAAAGAAATTGCGTTAGTGA	38	1.46154
AGCTTTGCCTCCATTTGATT	38	1.46154
TGGTGAAGCTTTTGTGATCA	38	1.46154
TCAAAGTGAAATGTGAGCAT	38	1.46154
TGAAGAGGAAAATCACCTTG	38	1.46154
AAGAGGAAAATCACCTTGAG	38	1.46154
TGAATGTCCCAAGCTGCAAA	38	1.46154
AACAAAACCAATACCACTTG	38	1.46154
GAACAAAACCAATACCACTT	38	1.46154
TTCACGGTTTTACAAACAAA	38	1.46154
CCGTATCTTTCCCGTTGTTT	38	1.46154
AACTTGCATGTGCATGTTGT	38	1.46154
ACAGAACCAAACCGAAAATC	38	1.46154
GAAGAGGCGCAGATCGAAGC	38	1.46154
GAGGTTTCATGAAGAGCTTG	38	1.46154
TCTTGAGGAAAACAAAAATG	38	1.46154
CAGGCGAACTAGACCAAATA	38	1.46154
TACATTATCAATGGTCTCCC	38	1.46154
TGGATTGTCAAGATCGTGGG	38	1.46154
AGTTGGATTGTCAAGATCGT	38	1.46154
GCATACGCGGGTTGGAGACC	38	1.46154
CATCTCTGTCAAATGTGAGA	38	1.46154
GCACTTTTCCATCCTTTTTA	38	1.46154
TGGTCCATTGTCCAAACAGT	38	1.46154
AAAATGGTGTATATGAAGTG	38	1.46154
AAGCCAAAATGTGAATGGTA	38	1.46154
GAACCCTAAGTTTCAAATTT	38	1.46154
TTCTGAAATGGTTAAGGAAT	38	1.46154
CGCCCATGAGAGAGGGGGCG	38	1.46154
CGATGAAGAATTGCCAGAAG	38	1.46154
ATAACATTGTATATCCCCAG	38	1.46154
TGTGTTTAGGGGTGGGGGCG	38	1.46154
TCAGGTCCTTCGTCAGGTCC	38	1.46154
GTTCTTGTGAGAGAGGAGAA	38	1.46154
CTTCTCCATAAAAGGTGTTA	38	1.46154
AGTTTCCATAACACCTTTTA	38	1.46154
TCTGGAATATTTTGTTGTGA	38	1.46154
GATGATTCTAGTGTGGCAGA	38	1.46154
TTTGAGGTTGTTTGAGGTGT	38	1.46154
AGTTTCATGTGTTTGGCAAA	38	1.46154
TGTGTTTGGCAAAGGGATCT	38	1.46154
TTTGCTGACAGGCTAGGTTT	38	1.46154
TGAATACTGCAAAGAAAATC	38	1.46154
AGTGCTATCATCCCAAGAGT	38	1.46154
GGCTTTGATCCTGACCAGTA	38	1.46154
AGGACTTGGAATTTGGTTGT	38	1.46154
TCATGGGCTGCTATGAAAAA	38	1.46154
GGTTCTAAAAAAAGTTCCCA	38	1.46154
AGATTGTTGAGAAGATGAGA	38	1.46154
GTGGACCACCTTGCAGAAGC	38	1.46154
TCCTGGAACAACTTTGCTTC	38	1.46154
CGTGACTTGCGGGGAAATAA	38	1.46154
CCGTCGATTATTTCACCAAG	38	1.46154
GGTCATCTGTTATGACTGAA	38	1.46154
ATATACTCTCTCCGTTGATA	38	1.46154
ACTGATAACTCTGACAATCT	38	1.46154
TGAAGTTTTCTTGATGTTAG	38	1.46154
AATTGGCTCAAGATTTGGCT	38	1.46154
AAGCACCTGCTAGACTGTCT	38	1.46154
ATCGAGGCAGGTTTAAAATT	38	1.46154
ATTGTGCTTTATCTCTGGCT	38	1.46154
GTTTGATGTTGCAAGTTTGG	38	1.46154
GTGTGTGGAATGGAAAAGTT	38	1.46154
TAGGTCTGTTGGTATCTGTT	38	1.46154
TGGTTTGATGTGGAAGAGGC	38	1.46154
TTATTTCCCCTTTCCTCTTT	38	1.46154
AAACATCCTAACGTCTAGTG	38	1.46154
GCCGGTTTTGTTCCCCCGAG	38	1.46154
TTTGGCATAAGTTTTTCTCC	38	1.46154
GAAAAACTTATGCCAAATAC	38	1.46154
GTATAGCTCTAAAATGATGT	38	1.46154
AAAGGTGAGATTGAGTTTGA	38	1.46154
AAGATGCCTAGGGATGTTTG	38	1.46154
AAGAGGTTCTTTTAGTGGCT	38	1.46154
CTCCAGCAGAATGATCCTAG	38	1.46154
GGGCAGATTGTGACGGTCAA	38	1.46154
TACTGACGAAGATCCGTGAC	38	1.46154
ACTGACGAAGATCCGTGACT	38	1.46154
CGTTAACCGGTTAACGCGCG	38	1.46154
TCAGGAACTTTGAATTTCGG	38	1.46154
TAAATCCTATACCCGATTTG	38	1.46154
CCAATCGCTTGTTTGATCTT	38	1.46154
CATTGATTTTGTGGAGCATG	38	1.46154
TGAAGAACAGGGATGAAATA	38	1.46154
CGGTGTACGTCTTTCCCCAG	38	1.46154
CGTGACAACCAGATTAATTA	38	1.46154
CCTGAAATGTTTGCAATTCT	38	1.46154
TTACGCAACAACTTGAAAAT	38	1.46154
CGCTAGCCAGATGAAAGCAG	38	1.46154
CAGACGTTTCACCTCAGGTA	38	1.46154
TCAAAGTGAGTCGAGACCCT	38	1.46154
AAAGCATACCGTTCAGCAGA	38	1.46154
TGATCAGCAACTCTTACCAG	38	1.46154
ATCCTCAGTAGAATCATTGA	38	1.46154
CGACATCTCTTTTGAATGGC	38	1.46154
GAGAGTTACAGTTTGTGGGA	38	1.46154
AAAGATCCTATGGAAAACCA	38	1.46154
GCGTTCACTTTATCATCAGA	38	1.46154
TTAGGGAAACAAGATGAGAC	38	1.46154
CTTGAAGATTGGTTCACAGG	38	1.46154
GATTGAGTTACCTATCAAAG	38	1.46154
AAAGCAACGGTGATCTGCGG	38	1.46154
ATAGATAAGGATCTTCAGAT	38	1.46154
ATCCAGTGGAAAAACATCCT	38	1.46154
GGATGCTCGTGGCATATGAC	38	1.46154
TCTTGCTCTTTGGATTGTTG	38	1.46154
GCCATTATCTTACTTTGCGT	38	1.46154
TGCTTCCATACCATAAACAA	38	1.46154
GGGATAGAGAAAACTCCGCT	38	1.46154
GTTTTCTCTATCCCTTGAAG	38	1.46154
ACCACATCACATCCTAAATA	38	1.46154
TTCGGATCAAAAGTTTGGTT	38	1.46154
TGAGGCCTGTTAGGTTTTTG	38	1.46154
GCTGTCTTGGCAAAGGTTTA	38	1.46154
AGCAGTCTCAACAAGGCTGC	38	1.46154
GTGGAAAGCAATTTCAAGAA	38	1.46154
AATAAGCATAATGGATATGG	38	1.46154
TCTCCTTTAATGCTGCAAAT	38	1.46154
GGTAGGGTTCTGAGATGAAT	38	1.46154
GAAGTAGTCACAATGTACTT	38	1.46154
TGAAGTAGTCACAATGTACT	38	1.46154
ATTGATAACCATGGATACAA	38	1.46154
GAATAAATAAGTCCCACTTA	38	1.46154
CAGGCCAATGGTTGGGTCAT	38	1.46154
ACAAGAAAGAGTGGATGGAA	38	1.46154
AGGGAGGTTACCATTACCAA	38	1.46154
TCCATCTTGAATTATGAACT	38	1.46154
ACATGGTGACTTGGGGAGTT	38	1.46154
TGAGGCCTAATGGTGAATTT	38	1.46154
GAGAAAGCACAAGATGACAA	38	1.46154
ATTTCCAAGACAGTTTAAGT	38	1.46154
CTGTTCCATAATGATTCTAG	38	1.46154
ACTGTTCCATAATGATTCTA	38	1.46154
TACTGTTCCATAATGATTCT	38	1.46154
ACCACTTGAACTGCTTGAAC	38	1.46154
TATCGTGCCAGTTCCTAAAA	38	1.46154
AGTCAGGCACAAAAATAATC	38	1.46154
ATACTATCCCACTTCCATTT	38	1.46154
TTTGCAAGGTGAGGGCTATT	38	1.46154
CCCAGTCCACTAAGCCATGA	38	1.46154
CCGTCATGGCTTAGTGGACT	38	1.46154
AATATGCTCCAATTTCCTCA	38	1.46154
TAAGAGTATCAATAGAAGTG	38	1.46154
GTTTTCAATGACTTCTATCT	38	1.46154
ATGGGAGAGCTTGTCTATCA	38	1.46154
AGGATAGGGATTTGACTTTT	38	1.46154
TAGAGGCATTGAGACTGTCT	38	1.46154
AGGATCATACCTCCATGTTT	38	1.46154
TCTTTCTCAACATTCCTACT	38	1.46154
GGGTCGCGGATGCTCCATTT	38	1.46154
TTCACCCGATCTCTGTTTTT	38	1.46154
AAGGGATGGAAATGAGGTTA	38	1.46154
GAGTTCCACTTCGGTGCGCC	38	1.46154
TGACTGTGGTGTGGAGGCAT	38	1.46154
GTGGAATGACTGTGGTGTGG	38	1.46154
ATCTGGGAACAAACCGAGTC	38	1.46154
CAACAGAATGAATCAGTTCA	38	1.46154
GGTCACAAATCTCCAAGCTT	38	1.46154
TGGCCTTAAAGTTCCCTCGA	38	1.46154
AAAGGTATTTTTGCTGCTTA	38	1.46154
AGAGACATCTTTCACAGCGG	38	1.46154
GACAATTACAAGAAGAGTGA	38	1.46154
CTTCATGAAAAATAAAGAGC	38	1.46154
ACCGCATCATATCCTATATA	38	1.46154
GCCACTTTTGAACACAAGCT	38	1.46154
CTTCGGCACCGTAACTCCAA	38	1.46154
GCTCTCCTCGACTTAGTCGA	38	1.46154
TCCCAACTTTCTTGTTACGC	38	1.46154
CGCGCAAAACTTGAAATTTC	38	1.46154
ACCGCAGAGGTAAGCGTCTG	38	1.46154
CCGCAGAGGTAAGCGTCTGA	38	1.46154
AACGAGCACCAGACTCTACT	38	1.46154
AAGTACGAGGTGCCTAGACG	38	1.46154
TCTGAGAAATAAATTCAGCT	38	1.46154
CTCTGAGAAATAAATTCAGC	38	1.46154
AGCTTCCTATTTTGCCAGAG	38	1.46154
GTGCCACTCATGGGTACGAA	38	1.46154
AGAAATAGAGTTGCCGATCA	38	1.46154
AGACAGAGGAAGGCCAGGCT	38	1.46154
AGTTATCTAGTTCACAAAGA	38	1.46154
GATTCTCGTAATTCCTTAGG	38	1.46154
ATTCTAGATGAGGGGAATCT	38	1.46154
GATTCTAGATGAGGGGAATC	38	1.46154
ATGAAACTCCTACCCGAAGG	38	1.46154
TGTTTCGATGATTTTGAGTA	38	1.46154
CAAAGTCTGGAACTTAGAGC	38	1.46154
TTCCTCCCCCATCCATTAAT	38	1.46154
TAAGGTGTATGTGAGCATGG	38	1.46154
TGGTAAGGTGTATGTGAGCA	38	1.46154
TTGATTGAGGAAGAAACTGC	38	1.46154
ACAAGCACCAACTTTTACTG	38	1.46154
TTTGTAAATGAAAGATGGAG	38	1.46154
GAAGCATTTAAAGAGGATTG	38	1.46154
TAGGATGTTTGTTTGCTTAA	38	1.46154
AATTTAATCGGCTAAAAACC	38	1.46154
TGTGCACATGGGAGAAAATG	38	1.46154
GTGCACATGGGAGAAAATGA	38	1.46154
TGGAGAGGGTAAACTTTGTT	38	1.46154
ATGGCTGGAAAGTAAATGAC	38	1.46154
AAACCCTAGCAACAAGAATC	38	1.46154
GTTTTGGAGTTTGAGGTTTT	38	1.46154
AGTTTTGGAGTTTGAGGTTT	38	1.46154
ATGCAGAAGCAAGATCCTGA	38	1.46154
GGGATGTATTTCAAGTTATA	38	1.46154
CGGCAACAAAGTAAATGAAA	38	1.46154
TATGTGGCAGGCACCCACCT	38	1.46154
CAAGCGAGGTGTGACGAACG	38	1.46154
GGGGAAGGGCCCTGACGGAC	38	1.46154
TGACACAGTTCTTTGTCTTT	38	1.46154
CAACTTTTCTTCTATGCTAC	38	1.46154
TCAACTTTTCTTCTATGCTA	38	1.46154
CAATCCCTTACCTAATCATG	38	1.46154
CTCTATTCGAACAGAGGTGT	38	1.46154
GAACTCCTTCGTCGTGTAGA	38	1.46154
CAAACAAACGGTCAAGGATT	38	1.46154
GTGCTCGAGAAAGCAACATG	38	1.46154
AACTTCTTGTATCCATAATC	38	1.46154
GATCTATGTGATCAAGCGAA	38	1.46154
GATTCTGTAATTTGTGCATC	38	1.46154
ATTCTGTAATTTGTGCATCT	38	1.46154
CAGTATCAGAGCAATATATG	38	1.46154
GAAAGTTTTGATGGCCACAT	38	1.46154
AGAAAGTTTTGATGGCCACA	38	1.46154
CAGAAGAAAGAAAGTTTTGA	38	1.46154
TTCAGAAGGAGAGACCTAAG	38	1.46154
TGTAAGTGGTTCAGTAGATG	38	1.46154
TCCCGTAGAAAAATGGACGA	38	1.46154
AGTGTTTCTCGATGAGATTC	38	1.46154
TATTTTTGTAGATCCTTCCA	38	1.46154
ACATACCTCAAGCAACCACT	38	1.46154
ACTTTTGGTAGCTAGGTTTT	38	1.46154
GGGTACAGTTAGGATAGGAA	38	1.46154
TTGTTTTGCATTGAAGCTGA	38	1.46154
GTTTCTTGATTGATGTCTCG	38	1.46154
CAATACTGAAACACATATTG	38	1.46154
AATATGTCGGTGTTAGTCAA	38	1.46154
AATCCAAGCATGAAAACATT	38	1.46154
GGATGTTTAAGGGACATTGA	38	1.46154
GTATGTGTGATGTTTATTTG	38	1.46154
ACGAAGCACTGATATCGACC	38	1.46154
CCTATGAACCATACCTACAA	38	1.46154
CTCTGGCTCTGATCCATTGT	38	1.46154
TGCTTTGATCCTTACAAACA	38	1.46154
TTGATCCTTACAAACATGGA	38	1.46154
TCCCCAGCTGTTTGTTTGTA	38	1.46154
GTTGTCAGGAAAAATGGAAA	38	1.46154
GGGATTATAGGTCAAAATTG	38	1.46154
AGAGCAAAGTGGAAGAGAGA	38	1.46154
CGCATTACATGTTGATGCTT	38	1.46154
TAGCGGCTCGAAATCCTAGG	38	1.46154
CATTAAATCCATGGACAACA	38	1.46154
CTTTCGAAACGCTTGAATTC	38	1.46154
GTATTATCCTGAGGATGTGA	38	1.46154
GGATGATGAAGTTATGATGT	38	1.46154
CTGCGCCAGTCAGACTATCT	38	1.46154
GGCCAACAGAGTTTCGACCA	38	1.46154
TGGGACATTTCATGACAGCT	38	1.46154
GGGACATTTCATGACAGCTA	38	1.46154
ATTTCCACCAAAACCCAGCC	38	1.46154
ATGGTTTAGGGGTGTTCTAA	38	1.46154
AGCCTCACGGAAAACCCACA	38	1.46154
GGGAGTACCGTGGATGTAGA	38	1.46154
GTTTCCCGATGAGATTCCTA	38	1.46154
GTCGTGGTAAGGAATCAAGT	38	1.46154
GGACCTCCATGGTTTGGCAT	38	1.46154
TTGACATGGCTCCAGATTGC	38	1.46154
TAAGAAGAATCAGTTGAAGT	38	1.46154
CATATACATGGATGGGCAAT	38	1.46154
GCCCCAACACCAACCACATT	38	1.46154
TCATAGCGTTCAATTTGTTG	38	1.46154
TCAAAATCAGACTCAGAATC	38	1.46154
GAAAATTGGTTCTTCAATGT	38	1.46154
TCTTGCCTTCAATGACCGAA	38	1.46154
TCCCTTCTGAAAACACTGCT	38	1.46154
TGAAAAGAAAATTCCATCTC	38	1.46154
CAAAATTTAGTGAACTTTGG	38	1.46154
ATGAAACTTGAAGGTTTTTG	38	1.46154
CACGAATTTGGATGAAGATA	38	1.46154
ACCCACCGGTCTATAATGTG	38	1.46154
TACACCAAGTACAGTCAATC	38	1.46154
GTTAACAATGTGAGTAGAAA	38	1.46154
TCAACGACAACAAATGGAGC	38	1.46154
ATCAAGAAGTACAGTCTGAA	38	1.46154
CTTGCTGTATATGATGATTT	38	1.46154
TGACTCAACCTAAAAGAACA	38	1.46154
ATGCTAGTATCCAGGAACAT	38	1.46154
TGACAGACATGCTAGTATCC	38	1.46154
TCTTTTGCAAATTCCGGTTA	38	1.46154
GGTTTCAAATTCTTGTAGTT	38	1.46154
AATTCTTTCATCTGCATGCT	38	1.46154
CTAGGTCAAGTGTCTTGCAT	38	1.46154
ATGAGAACATGGTTTAGGCT	38	1.46154
AGGTTTGGGATGGAATGTGA	38	1.46154
ACCTTCACATGGCTTACTCT	38	1.46154
CTGAGGATAAATGGCTCCGC	38	1.46154
GCTAGCTTTCGATAAAATCA	38	1.46154
GGTGAATGTGGTCCTTTTAT	38	1.46154
GAGTTTCGGGTCTTTTCTAA	38	1.46154
GACTTTTGAGGGTTTTATGA	38	1.46154
TCAACTGTGAACACATGAGC	38	1.46154
TCTGGCCCTTCTTCGGGAAG	38	1.46154
AGAAAAAGTTGATCACCCTC	38	1.46154
GACAATGACATTTTAATCGA	38	1.46154
TAACGATAAGTAGATGCTTA	38	1.46154
GGTGCAACGTCACCTACGTT	38	1.46154
GATTTAAGAAGCTTGAACAG	38	1.46154
TTGTCGCTTTCGCATTTCAG	38	1.46154
TACGTTGATTTCCAAGTTGC	38	1.46154
ATGCATGAAAATAAATGCGC	38	1.46154
ATGAAAATAAATGCGCAGGT	38	1.46154
TTTATCTTTGGCACCTTTTA	38	1.46154
GTTTGGATGGAGTTTGAGTA	38	1.46154
GTTGGGTATGTTGATTCTCG	38	1.46154
TGAAAGTTCCTTTCCGTTGT	38	1.46154
TGGTGAAGTTGTATAGCCAT	38	1.46154
AGCCATTGGATTAAGGTTTG	38	1.46154
GCACTCCAGTTGACAGTTGG	38	1.46154
TGTTGTTGCTGTGGATACCT	38	1.46154
TTCTCCTGGGTCTGTCTTTC	38	1.46154
AAAAACCTCCTATGACTGAT	38	1.46154
AATTAACCCTTGCACTGTAA	38	1.46154
TGGGCAAGTTGTGTTTGCAT	38	1.46154
TTGTCTGTATTGGGTGTTTT	38	1.46154
AACTAAGATCTACCCTGCCC	38	1.46154
CAGGGTAGATCTTAGTTAAT	38	1.46154
GAAACGAACGTTGATTCCTT	38	1.46154
TGTCCAAGTCCTATGAAGAA	38	1.46154
AAAGACGACAATACCACAAT	38	1.46154
AGAGTGGATACGAATGGTAG	38	1.46154
GATATGGACTTCCTCTGGTA	38	1.46154
TGTGGACGTGACTCCTAGTG	38	1.46154
TTCAAAGAAGATTCAAGAAG	38	1.46154
GCTTCTACTAGCTGTGATAC	38	1.46154
GGATGAAATGCATGATGGAA	38	1.46154
CGAGGACAAGACACCGGTTG	38	1.46154
AGGTCATTTTGAGCAAGCAG	38	1.46154
TGTAATGGGAACTAAATTCA	38	1.46154
AGCTGGATCGTCTCTACAGT	38	1.46154
CTGGTTTGGACATGATCAAA	38	1.46154
GTGTGTTTGACTTGGTTTCA	38	1.46154
TGGGGTCAAAAAGTGGTAAA	38	1.46154
TTTTGGGCCCTCCATTTGGA	38	1.46154
AATTTGAGGTGAATTGGTGA	38	1.46154
CTTTTTATAGGTGATATGAG	38	1.46154
AAGCAGATTATCAGATGTTC	38	1.46154
CCTTAGCATTCTCATACGCC	38	1.46154
TCCGTCTCATGTGGTTCAAA	38	1.46154
TGCAGATTATGCGAACTATT	38	1.46154
TGGGAACCGGGTTCCATCTT	38	1.46154
AAAAGGTTTGTGGAGTTAGA	38	1.46154
TTTGGCAGGTTTCATGTTTT	38	1.46154
GAAGTTAATCTCAAGATCAA	38	1.46154
GACATCCTTACCCATCTGTT	38	1.46154
TGGAGCTGTCATGTGATTTG	38	1.46154
CGTGGCATGATTATGTTTGT	38	1.46154
AAATGGCAAGCAATGGAACA	38	1.46154
CTGAGGTTCCACTTGGTTGT	38	1.46154
CACCTGTCTACCTTGAACCT	38	1.46154
CGGTAAAGAATTTGATGCAC	38	1.46154
CACAATGTAACTCGACATGT	38	1.46154
CCACATGCAGAGGCATGCAT	38	1.46154
CTTTCTTGGGTTGTTGTTAT	38	1.46154
ATGAAGAGTGTGAAGAAGAC	38	1.46154
TGTGGTTGACGGGGAGGAGG	38	1.46154
CGTTTGGGTTGAAAAATGCA	38	1.46154
ACAAATGGCCCTTCGTAGTT	38	1.46154
CAGATCAAGTGTTGTTCTGC	38	1.46154
GAGGCTTTATGAAGTGAGGT	38	1.46154
GGTTATTTGAGGATGATATG	38	1.46154
GTAAGATGTGAGTGTGTGCT	38	1.46154
TATTGGCTGCTTTGCAGTTC	38	1.46154
CTTCGTCGTCAACCAACAAC	38	1.46154
GCCATTGCTGAAAATCAAGA	38	1.46154
AGATCTTTGACCCCACAACA	38	1.46154
CATAGATGTATGCAACCGTC	38	1.46154
GTAGGTTGAGGATTAACCAT	38	1.46154
ACCGCTCCGGGTAAACTCGC	38	1.46154
CCAACGTCGCGAGAACCTAT	38	1.46154
ATAGAACCAGTACCCTGAGG	38	1.46154
TGGCTAAAGGATCACATGCC	38	1.46154
CAGGAAAGGTATGAAGTGCC	38	1.46154
CTTTTCCAGACTTAAGTTCC	38	1.46154
GAGTACCTCTCAGAAAAAGT	38	1.46154
TCTGGCAGGGGAGTATAGTC	38	1.46154
CGACCAACATCTTGCAAACG	38	1.46154
GGGCCACGTTTGCAAGATGT	38	1.46154
CAGGACTTTGCAGCAGAAAT	38	1.46154
TGACCTTATAGTTCATCAAA	38	1.46154
AAAAATGGGTGAAAAGGAGG	38	1.46154
TATTTTTTTCGAAAGCCTTC	38	1.46154
CCGGAAGAGGGACCAGAACC	38	1.46154
ACCATTGGCCTCCACTTATT	38	1.46154
ACCTGAACTCTGGATGCTCG	38	1.46154
TTTTTATGGGTAATGACCCA	38	1.46154
AGGTAAAAGGACCACTACCC	38	1.46154
CAAAAGCGTGACTCTGACTC	38	1.46154
TAACATCTCACAAAGGAAAG	38	1.46154
TTTTGTGCCTGATTATTCTA	38	1.46154
GTAGCTTGGTGAGACTTTAG	38	1.46154
AATCGGGTAATGTTGGAAGT	38	1.46154
ACCGGTATCTACCAAGACAT	38	1.46154
AATTTCATTCCGGAGGAGTA	38	1.46154
GTGTTTTGCCCAAGACACGG	38	1.46154
GGGGATGTCATGACATTCAA	38	1.46154
TTGATCTTCGACAAAACTTC	38	1.46154
CCCTTTCTAATGTCCACAGT	38	1.46154
CCCACTGTGGACATTAGAAA	38	1.46154
AGTAGATTTCCTTCCTGGCT	38	1.46154
AGAAAGTGTCAGATGTCTGC	38	1.46154
TGACGCTGAACTTGGTAGGG	38	1.46154
CCTCTAGTACAACTTCATGC	38	1.46154
TGGAGAATTGGGATTAACAA	38	1.46154
AATTGAAGTGACATCCTTGT	38	1.46154
GGCGTGTGTGTGCAAGGGAG	38	1.46154
ATACACTCACAGCTTACTCT	38	1.46154
TTCAGAATTGTTGGAGTTGT	38	1.46154
ATTTTCCCATCCTGCATAAC	38	1.46154
AGTGACTCCAGTAACAGGTG	38	1.46154
AGTGAGGAAAACTTGATTAG	38	1.46154
AAAAAGTGTTCCTACAGAAA	38	1.46154
ATGGATTCTAACCTTGCAAT	38	1.46154
CTATTACAAGACTTTGGGAA	38	1.46154
TATTACAAGACTTTGGGAAT	38	1.46154
AAAAATCAAGGATCAATTCG	38	1.46154
ATAGGTCATGTATGCTTTTT	38	1.46154
GATGGGGTTTGGGGTTGATT	38	1.46154
AATGCATTTGATATCACCAA	38	1.46154
TGTAGCGTTTGAATATGACG	38	1.46154
CTAGCCAAAATTGTCATTCT	38	1.46154
TAGGCCTAGAATGACAATTT	38	1.46154
TGGGACTGATGTGATTTTGT	38	1.46154
AGAAGAGAACTCTCCTGCAG	38	1.46154
TTGACCTTTTCTGGAGAAGA	38	1.46154
TCAGAAGCCTCGCTGATAAT	38	1.46154
CTGAGAAGACATGCCAAAAA	38	1.46154
GAAAAGGGGAGTTTTTTATT	38	1.46154
GAAGCGAAAAGGAGCGAAGA	38	1.46154
TCTGCTAGGATTGGTTTTGG	38	1.46154
TTTTGACCATAAAAAATGGG	38	1.46154
TGATGGAGTAGGAGGTTTTG	38	1.46154
TCCTCAGAAATTCCCTGATT	38	1.46154
TCAATGCCATGCTCTGTCTA	38	1.46154
AATCGTCCGTAGACAGAGCA	38	1.46154
AGGGAAAATGATTTGAGAAT	38	1.46154
AAGATTTGAGTTGGGTAAAA	38	1.46154
AACCTACTGCTAAACCTAAT	38	1.46154
GAAAAGTTCTCTTGATGCTA	38	1.46154
GGTCCCAACTTCGTGACTCC	38	1.46154
AGACTTCATCTCATTTTTTC	38	1.46154
GCGCCTTATGGAGGCCACTT	38	1.46154
TGATGTATCAAATGTTGGTT	38	1.46154
ATACGAAGGACACTTTGAGA	38	1.46154
AGGGAAGAGCAGAGACGAGG	38	1.46154
AGTTTTCAAAGTGCTTCATT	38	1.46154
AAGGCCATTGGAATAAGGAT	38	1.46154
CCCTTTGGTACCCATTCAAG	38	1.46154
GAGTTAGCATTCCCCAACCA	38	1.46154
AACTAGAGAAAGTTTGGAAA	38	1.46154
CGAGGACAAAAACTCTTTAG	38	1.46154
TGTAGAGTGTCCCCATAAGC	38	1.46154
AACCCTTGATTTCCTCACAC	38	1.46154
GAACTCCGATGTTGCAGAAA	38	1.46154
TTGCAGAATAGAAGGATATG	38	1.46154
GGTTTTTTGGGTGAACTTTG	38	1.46154
CTCTTGAAATGTCTCATGTG	38	1.46154
GATGCATATGAGTAGATTTT	38	1.46154
GAGCATTTCCTCTTACTCAA	38	1.46154
TCAGAAATGAGTGATGCTTA	38	1.46154
TTGCCGTTGTGTGAAAATCG	38	1.46154
TTTCGTTGTCCTGGAGCCTT	38	1.46154
AAGGAGAGTGAGTTCAAGTG	38	1.46154
AAAACCCAATGGAGGCTTTG	38	1.46154
TAGCAACATATCACATACGA	38	1.46154
CCCCTTCAGAAGCCAAAAAA	38	1.46154
GTTTGGCTTGAAAAATGCAG	38	1.46154
ATTGTGCATGACAACAATTA	38	1.46154
AATTGTGCATGACAACAATT	38	1.46154
TCCAAAATTTGGATGAACTT	38	1.46154
ATATGCTTAGAATGATGATG	38	1.46154
ATATGAACATGAGCAGGCTT	38	1.46154
TGAACGAAGAAGAAGAAGAA	38	1.46154
AATGAGATGGAAATGGAGTT	38	1.46154
AGGACCAAGGATCAGAAACT	38	1.46154
GGAACACTGACAGGTGCTCT	38	1.46154
GGCACACACTAGACCAGATT	38	1.46154
TCCGAGGGTGAGACATTTGC	38	1.46154
GTTTTGCGTTTGGATTAATC	38	1.46154
CTTTTCTGCAGCACGTTAAC	38	1.46154
AGAATTTGTTCCTTCACTTG	38	1.46154
ATAGTAGCTGCATAGCAGTA	38	1.46154
CGAAGCAGTTCTCTTGAGAG	38	1.46154
CAGATTCTCATCATAGAATC	38	1.46154
TCAGCTGGGGGTAAACCTGA	38	1.46154
CGAAGGAGCAGCGAAAAAGT	38	1.46154
ACTTCTCTGATATCTTCGCT	38	1.46154
TTTGCCTGAATCTCCCTTTC	38	1.46154
TGGATCTTGACCAAATATTT	38	1.46154
TGGTGAATGAGTCCTTATAT	38	1.46154
ATGGAAGTTGTTTAAGGTGC	38	1.46154
GTTCATAACTGAAAGGGACA	38	1.46154
CAAAGGAGATTTTGAGAAGT	38	1.46154
ACCATAAAAAAGAGAAGGTT	38	1.46154
ACCCATAGCAGATCGCAGGT	38	1.46154
CTCTATAGATGTAGGGAGAA	38	1.46154
GCACTAAAAGTGCCATGTGA	38	1.46154
GAGCAGTGACGTCCGTCACA	38	1.46154
GTCACTGCTCATGTGACGGA	38	1.46154
GATTCATCCCAGAGTGTTCC	38	1.46154
ATAACAGTCAATCAGTTCGA	38	1.46154
TCTGGATCTGGATGAAATTC	38	1.46154
TGGGAGAAAACCCTCTGCCA	38	1.46154
GAAAGACTGTTATCTCTGCT	38	1.46154
ATACAATTGTCCATGGCAAA	38	1.46154
AAAAGAGGCATGGAAAAGTG	38	1.46154
TTGAGGAGGGGCAGGTAGTT	38	1.46154
AGGAGATAGGGTTTATGATC	38	1.46154
GTTTTGTAGGCAAAGGAGAT	38	1.46154
ATGTGGAATGTGTTTGATGA	38	1.46154
GTATGATCCCGATGGTGTGT	38	1.46154
TTGTTGAGGTCATGTGTATT	38	1.46154
ATTTGCAAAGAGGTTCCCCG	38	1.46154
TTCAGTTCAAAACCTTTTCA	38	1.46154
CTGCACGTGTGTATTTTTGT	38	1.46154
ATATTTGGTGTGTGATGGTT	38	1.46154
ATATGATGAAGGTGAGCTTT	38	1.46154
TTTGTAAAATGGAGGGTTTA	38	1.46154
AAAACTCGAAAGGGCAGCTT	38	1.46154
TCTACAACTCCATTTTCCTG	38	1.46154
AGAGGATTTGATTCGATTTG	38	1.46154
TGGGCTCGCTCTTGGGCGAA	38	1.46154
AATTCCACTTCACGCTCCGG	38	1.46154
CTTGAAGTTCCACGAATTTG	38	1.46154
CATGACAACATCTTTTTTCT	38	1.46154
TTTTCCTTCAGAACTTCTGA	38	1.46154
TCATGACAGGATTTGTATTT	38	1.46154
GTGGGGAAGTGAAGGGGTAA	38	1.46154
GGGAAGTGAAGGGGTAAGGG	38	1.46154
TGGAGAAGGGGAAAAATAGG	38	1.46154
TACAGGGTCCAAGATACCCG	38	1.46154
AAGCATACGATAACGTCGAT	38	1.46154
CAAATAAGAAAGGTGAAAGA	38	1.46154
TTTCCCATTTTCTTTCTTGC	38	1.46154
ATCATGCATTCATGCATAGG	38	1.46154
CAGCGTGGCAACTTTTTGAC	38	1.46154
TTGATGAAGACAGCAAAGCT	38	1.46154
ACATTTAATTTCAGGGATCC	38	1.46154
TTTCTTGGTTGTTGTTGTTG	38	1.46154
AAACTCTGGCAATTTGAACT	38	1.46154
CCTATAAAATCCATACCAGA	38	1.46154
TCAAGAAAAGACCTTCTAAC	38	1.46154
TGTGTTAATCGATTAACCCA	38	1.46154
TGAAAGGGTAAACTTGGTTG	38	1.46154
ATCTGCTGGGGATCAAACGG	38	1.46154
CACCCAGTATCAAAATCGAG	38	1.46154
GGTGGCCTAATGTACCCGCG	38	1.46154
CTCTGAAATCGGAGAGGTTC	38	1.46154
CCCTTGGGTGCTTACCTCTG	38	1.46154
GGAAATTTATGAACAATGGA	38	1.46154
TTAGGCTATAGATTAATCTG	38	1.46154
GAGTTAGGAATGGAGGAAGT	38	1.46154
GGTTTAAAGCCACTGCATCC	38	1.46154
AACTTAAGCCAGATAGCTGG	38	1.46154
GTTTGGTGATTGTGAATGTT	38	1.46154
GAAAAGGTTGACCAGTGCTC	38	1.46154
AGTATTAATGCAGAACGGAC	38	1.46154
ATCGTCTTCATCATCACACG	38	1.46154
AATCGTCTTCATCATCACAC	38	1.46154
TTGGAATGAGAGAGGTTGTG	38	1.46154
TTAGCTGAAAATTTGCCAAA	38	1.46154
AAAAGCTGGAGCTGAATTTA	38	1.46154
AATCGTTTCACAACTTAATC	38	1.46154
CGAGAAAGAGCGGATGCGAA	38	1.46154
ATTCAGTTTACTCCAGACAA	38	1.46154
ACTAGGGCGCAATTCTACCC	38	1.46154
TGTATCTACTGTTTGGCTAA	38	1.46154
CATACCTTGTATCTACTGTT	38	1.46154
TGGAGACATAGGGCTTTATG	38	1.46154
CATTTTAATCTGAAAAAGGC	38	1.46154
TGGAAAAGGCTGATAAATGA	38	1.46154
GAGTGGAGCCAAAAGGTATG	38	1.46154
GTATAAGGCACTGGGCCTGG	38	1.46154
AGCAGTACAGAGTTCAAAAG	38	1.46154
TGGGACAAAACCAACAACTG	38	1.46154
CAACTTGAACAGCAGTTCAC	38	1.46154
TCGACGAGGCTGAGTGGGTT	38	1.46154
CGAGGCTAAAACAACATGAA	38	1.46154
GAGTTTTGTTGGGGTGATTA	38	1.46154
TTTGGGCCTGTCATGGAGAA	38	1.46154
TAGGACTGTTTGTGATCATT	38	1.46154
AAAATTCGGCCAGGCGGCTT	38	1.46154
GTCACTAAAATAAAGAGGAT	38	1.46154
CAAGAGGAAGAAGAAGAAGC	38	1.46154
TGTCTTGTTGTTATGTCTCC	38	1.46154
TTTGTCTCAGCAAAAAGAAC	38	1.46154
TGATATGAGCTTGTTATGTG	38	1.46154
AGTTCTTCTCTGCCATCAGC	38	1.46154
ATCCCTTTAACAACTTGCTG	38	1.46154
ATTCCCTATAGTTTCTGAAT	38	1.46154
TTTGGATGAATTGAGAATTC	38	1.46154
GGTGTGCCTTGATCAGCCAA	38	1.46154
GATGAATAAACGGGACGATT	38	1.46154
AGCGTATAGGCACGCGTACA	38	1.46154
TGTGACCTGCGAGGAGATAA	38	1.46154
TTTACCTTTTTGGTTTCTGA	38	1.46154
TTTTATAAGCCCACATCATT	38	1.46154
AAAGCATGCATCAGCAATTT	38	1.46154
GGAACTTCTTGTCCTCGGCC	38	1.46154
AAAATACGAAAATGGGTACA	38	1.46154
TCAGTGTCTCAACATCACAT	38	1.46154
CTTCAAAAGCTCTACAAGCT	38	1.46154
ACCATCTGTCAAGACTCCGC	38	1.46154
GATCCCATCAAACTGATTAA	38	1.46154
GGACCTCCATGGTTGGGCAA	38	1.46154
CAATTATCAATTTCGGAACA	38	1.46154
CGCGAGCTAAGAAATGCGGG	38	1.46154
TCTGCACCGTTTATCCGAGC	38	1.46154
CCTCTCTCTGAACACATCCC	38	1.46154
ATGTCGTGTTGTTAATCAAA	38	1.46154
CTATTTAGGTCGACGCATTC	38	1.46154
TCATTTGGAGTATCAGATGG	38	1.46154
CAAAACAATGGGCCTGGGAA	38	1.46154
AATTTCGGTAAGAGAAGAGA	38	1.46154
GTTTGAGGAAGTTCAAACTT	38	1.46154
GTACCTTCGGGGTAAGATCA	38	1.46154
TACAAGCTCGCCTTCCTGAA	38	1.46154
GACTCTCTGTAACGACAGAC	38	1.46154
AAAGATCTTGCAGAAGATGG	38	1.46154
GCTAAGAAGATTTTAAGGGC	38	1.46154
TGTCTTGCCTTGCCTTGACT	38	1.46154
GAACAGTTGACTGGCCCCGA	38	1.46154
CTATGAAGATATGCCCGGGT	38	1.46154
AGGGTTAGTATCATGGCTGT	38	1.46154
TTACTTGAGGACTTTTGTTA	38	1.46154
TACTTGAGGACTTTTGTTAA	38	1.46154
ACTTGAGGACTTTTGTTAAG	38	1.46154
CAGCTATAGAAGAATGGTTA	38	1.46154
GCAAAATTCTGCTCGGATAC	38	1.46154
ACAGTTTCGCGATATGAGTT	38	1.46154
TTGGGATAGTTATTTACTGT	38	1.46154
GACTGTTATGGCTGGAATTG	38	1.46154
GGGGCGGTAGCTAATTCCCA	38	1.46154
AGTGAGAAGTAGTAAATCAG	38	1.46154
ATCTTCTGTGATACATTCTG	38	1.46154
CTCTGATACACAGTCTGCTC	38	1.46154
TTTCTGAAAAAATGACTCTG	38	1.46154
ACAACCCTATGCATTAAGCA	38	1.46154
CAACCCTATGCATTAAGCAA	38	1.46154
AACCCTATGCATTAAGCAAG	38	1.46154
GGTAAGCCTTACGCATGCTT	38	1.46154
ACACCTTCCAAACTAGATGT	38	1.46154
CCTCCTCAAACTATCTCAAT	38	1.46154
GGTCTGTTTGACATTTGGGC	38	1.46154
TCAGGACATAAACCCTAATC	38	1.46154
GGAGACACGAGATTCAATCT	38	1.46154
TCTTCAGTTGAAGTCTTGTT	38	1.46154
GTATCATCCTCTTAAGCACA	38	1.46154
GGACTAATTGAGATAGTTTG	38	1.46154
TGAAGCTCTTGGAAACTCCA	38	1.46154
AAAAAACCCTTAGTCTCTCA	38	1.46154
AAACATTTTTCAGAAGGACG	38	1.46154
GAACTCTCAATTGTATTCAA	38	1.46154
GCCACTAGGAGGAATAAAAT	38	1.46154
AGGACAGGTTTCCAACAACA	38	1.46154
GGACAGGTTTCCAACAACAA	38	1.46154
AAAAATTTGCACGCGTTAAC	38	1.46154
GGGTGACGGTAATCAAGTTT	38	1.46154
GTTAACAGACTTCACAGTTT	38	1.46154
GGGATGGACTTGACGGATCT	38	1.46154
TGAGTAAGAATGAACACGAA	38	1.46154
TGCATGCAAACCTGCTGAGG	38	1.46154
GCTTTTCTTTTTTTCGCTTT	38	1.46154
AGAAAATGGTTGGTTTTCAA	38	1.46154
CATAACATTCAGAGATGAGT	38	1.46154
GATGAAGAAAAGAAATGATG	38	1.46154
AAGGAGAATTAAGGAGGAAG	38	1.46154
GGGCAATCAGTCATCCCCGT	38	1.46154
AGGTGGATTTTAGTGGACAA	38	1.46154
TATGGTTTGGCACCAAGATT	38	1.46154
CAAGAGAAATATCACAAATG	38	1.46154
TCAACACAAGGTCACCTACC	38	1.46154
GTGAAAGAGTACGATGTGTC	38	1.46154
TTGGCGTTGTGCGATAAAGG	38	1.46154
ATTTGGGATACGCGTAACAG	38	1.46154
CGAGTTGTTTTGATGTTATA	38	1.46154
GGTAAGGTATGTCGGGACGG	38	1.46154
AGCGACACTATTGGGAAAAG	38	1.46154
CAGCGGGGATTACCAAGGCA	38	1.46154
CAAAGAAAGGATGAAACAAG	38	1.46154
GATTACTATTCCGTATGATC	38	1.46154
CGCGTTGAATGAGTCTCTGA	38	1.46154
AGAATTCGAAATAAGCATGA	38	1.46154
AAAATCACTTAGAAAGGGGT	38	1.46154
AAAAGGTCCTTGGAAAATCA	38	1.46154
CATTGAGTACAACGGACGCG	38	1.46154
GTTTCATGCTAACTCTTACG	38	1.46154
TTGGCAAGGTTTGAGGGATA	38	1.46154
CTTTTTATAGGTGATTGGAG	38	1.46154
GCAAAGGGAAATCATCCTTT	38	1.46154
CCAAGCAAGAAACTATAAGC	38	1.46154
ATAACAGTTTTGCGGACCGG	38	1.46154
TAGGCATGAGTTGATAGTCC	38	1.46154
AGGGTTCTGAGGTGAATTGG	38	1.46154
GATGAACTTTGGTTGAGATT	38	1.46154
TCTGAGATTTGACATTGTAA	38	1.46154
CACCTTTGTCATTGAATTGG	38	1.46154
TCATGGTTTAGGTCCAAATG	38	1.46154
ATCGGAAACCTGTGTCAGTC	38	1.46154
GGTGGGACAATACCCGTCAG	38	1.46154
CTTCTGTCAGTCACGAGCAC	38	1.46154
TGGCCTTATGGCCAAGGGCA	38	1.46154
AGATCTAAACAAGATGACTC	38	1.46154
TGGTAAAGGCATTGATTGGT	38	1.46154
GAAGTATTTTTGAGATGGTA	38	1.46154
TCCAATTGCCTTAATGTTGA	38	1.46154
TCATAAAACCAGACGTCTTC	38	1.46154
GGTTGAGAAAATTTAGATTG	38	1.46154
GGACAATTTGTGGAGAAATC	38	1.46154
GAGTGTACAAGACTCCGCTG	38	1.46154
CCTGCTCACGGGGGGAGCAC	38	1.46154
GCTCTATTTTGATCTTGTGA	38	1.46154
ATATTTATGAATGAGCAGCT	38	1.46154
GAAGTCGTATGCTTCCCCAG	38	1.46154
TATCCGCGACTCGCTGGGAA	38	1.46154
CTTTACTGAATATTGCATGA	38	1.46154
GATGATTGGTGTTGGAAGTT	38	1.46154
TGATTGAGACAAGTCAGATA	38	1.46154
GATTGAGACAAGTCAGATAT	38	1.46154
ATTGAGACAAGTCAGATATG	38	1.46154
CAAGTCAGATATGGGGTATT	38	1.46154
CCGACGAAGGTATTTTTTCT	38	1.46154
AGAGTTGCAGAAGGAGCTAA	38	1.46154
TTTCCCAAGGACGGGATACC	38	1.46154
GATTTCTTGCATCATATTCG	38	1.46154
GGAACAGACTTGTTTTGTTC	38	1.46154
TCATGAGATAGAGCTCAACG	38	1.46154
TTGAACCATCTTTACGGGTA	38	1.46154
AACCAAACAAACAGGTTTAT	38	1.46154
ACCAATTCTCTCCACTGATT	38	1.46154
TCCAAATCAGTGGAGAGAAT	38	1.46154
CTATATCAGAAGGAATGGAG	38	1.46154
ATTACTTCCTTGGGCTTGAG	38	1.46154
TATTTATGATATGGGTGATG	38	1.46154
TAAGTTCATGAGTAACTTCT	38	1.46154
TCTGACCCGAAAGGCAGTCT	38	1.46154
TGATTACAGAGGTTATTTGG	38	1.46154
AACCAGATTCTAGGGGCAAA	38	1.46154
ACTGACTATGTTGACAAGAA	38	1.46154
CGCGCGTTTGGTAAGGTTGA	38	1.46154
TTGAAAGGACTGGTTTTCTT	38	1.46154
TTAATGCTAGCAACCATGGA	38	1.46154
GTTGTTTAATCTGAAGACCA	38	1.46154
GGTTCTTCTGCTGTCCAGAG	38	1.46154
TTGCAAAGCTTTAAAGAACA	38	1.46154
TTGGGGAAAGCCGGTCTTGT	38	1.46154
CAGAGAAAAGGGAGTTGCCC	38	1.46154
CCCACATGGAGAAAGGCCAG	38	1.46154
AGGTTACAACCAGATTAAAA	38	1.46154
ACCATTTCTGTGAAATCTGT	38	1.46154
TATAAGAGGAAAAGCATAAG	38	1.46154
GTTCCATTCCGATACTCGAA	38	1.46154
CATTTGAGAAGAAGAAAGAA	38	1.46154
ATATAGGCTTGGTTTCTAAA	38	1.46154
CCTTCTAAGTGACTTGTTTG	38	1.46154
TGCAGGACTGACAAGACTCA	38	1.46154
GCCTGTGATTTGGTCTTGAT	38	1.46154
GTTGGTTGAAGTATTGATGA	38	1.46154
CAACATTTGCTTTACCCGGA	38	1.46154
AATTCTGTAATTTGAGTTCC	38	1.46154
GTTTGTATGCTGTTTGGATT	38	1.46154
CAAAAATGTTTCTCATGATG	38	1.46154
CCCTGTCAAGGTTGCACCAT	38	1.46154
GCTAATGTGAACATGTCAAA	38	1.46154
GGTAGGATTTTAGTGGACAA	38	1.46154
AAATCTGGAACCTTGAACTT	38	1.46154
TCCAAAGGGAGTATGAGGTC	38	1.46154
ATCCTCAGCCAAATGCCCAA	38	1.46154
TGATAGTGAAAGCCTTTGAT	38	1.46154
TGCCTAAGTCGACTACCTTT	38	1.46154
GAGGGTTTTGTTGCAGACAT	38	1.46154
TGTGTTAATTGCTCTGATTA	38	1.46154
CTGATCTTGGTAGCCATATC	38	1.46154
AGAAACCCGCTCTAACCGGA	38	1.46154
TCTATATCCATGTAGTGCGA	38	1.46154
ATTTTGAAGGTTTGGTCATT	38	1.46154
GGTTTCTAGGTTTCCTCTTT	38	1.46154
AATGCAGGCGATGGCTGAGG	38	1.46154
CTCAAATTCGCGCATACAGC	38	1.46154
TCAAAATTGCTTTGGGGCTT	38	1.46154
ACCTACCTGTCATGCCTCAA	38	1.46154
CAAATTGAGTTGGAAAATCC	38	1.46154
TGAGTTTGCAAATTGATCTT	38	1.46154
GACATTGACCTACCTCGTGA	38	1.46154
GTACTGGCAAATGTGACAAA	38	1.46154
CTCCTCAACTTCTGCTTGAC	38	1.46154
CAAAAGAATGTCTTGCCTCA	38	1.46154
TCTTACCTTCGTCTATGAGT	38	1.46154
TCCATCGTGATCCTGGTTCA	38	1.46154
GGTCGACGCAAGGCATGTTT	38	1.46154
TGCTTCAAGCTTAAGAAAAA	38	1.46154
ATCAGTGTCTAGAGAGGAAG	38	1.46154
GAGTGGTTTGGATGTAATAT	38	1.46154
GTTTTGCAAAAGCCCAATGC	38	1.46154
TCACTTTCTATCAGAACATC	38	1.46154
CACATAACAGGCTGTATTCA	38	1.46154
TGGCTATTGTGATGTTGATT	38	1.46154
AGAAAGAAGTAATGGACACC	38	1.46154
CTATGTTCTGAGGTGAGGGT	38	1.46154
CTCTGTTACATGTTCATATT	38	1.46154
TCTCTGTTACATGTTCATAT	38	1.46154
TTATGCACTAATCGAAAGCA	38	1.46154
TGGGGGAGCTGTGACGCACG	38	1.46154
AGTGTGTTTGATGTTCAGTT	38	1.46154
AGTTCATCACGAAGTAGGGT	38	1.46154
ATAATGTGCTTGTTGACATG	38	1.46154
TGGTCAATTAATTGAGTGGG	38	1.46154
GGGGGACTTTTTCATTTGAC	38	1.46154
GAAGAAGACAAGATCGAAGA	38	1.46154
GATTGAAGAGAGATATTGCA	38	1.46154
AGAATGAGTAGTAAAGTGTT	38	1.46154
CTGCTAATCTTGATGATGAT	38	1.46154
TGCTAATCTTGATGATGATT	38	1.46154
AGAAGCCTTGTCAGTTCCTC	38	1.46154
AAGGTTCTCTTCAAGATCAT	38	1.46154
TCAAGTAAAATCAGGAAAAC	38	1.46154
AAGTATTTTTGGTATCACAG	38	1.46154
CTATTTTCGCTGAGCGAAGG	38	1.46154
CTTTTTGATGTGACAAAAAG	38	1.46154
AAGGCAGGAAGAGGTGGAGG	38	1.46154
TTAAATGAGCTGACAAAGCA	38	1.46154
TTCTCGCAATTACCTCTTTT	38	1.46154
CTGAAATAATCTTTCTCAAC	38	1.46154
TGTTTGGTTTAAGAACATCA	38	1.46154
AAAGCATGACCAAACAAACA	38	1.46154
CCACGAAAACCCTCCATGTT	38	1.46154
ACTGCGTTGAAATGGATTTC	38	1.46154
GGGAGATTCTTTATCTTAGG	38	1.46154
GCTTTACCACACCAACAAAA	38	1.46154
TAGCCAAAATTCATCAATCA	38	1.46154
AGGTGTTGAGATGTCTTAGT	38	1.46154
AAAATCAATCAATCAGTTGG	38	1.46154
GGATGAAGCAGTTTGGGAAT	38	1.46154
CAGTTTGGGAATGGGTGTCA	38	1.46154
GTATATGTGTGTGTACTTGT	38	1.46154
GGGAGTCGGCTTATTGCAAG	38	1.46154
CCATTCAGCCTCTGATAACT	38	1.46154
CCCAGTTATCAGAGGCTGAA	38	1.46154
ATTGTCAGTAATGATCTTAC	38	1.46154
TGAATATGAAGCCTGTGTTA	38	1.46154
CAGCTGATACTTTTGTATTC	38	1.46154
TCCCGCAATCGCACCAACTC	38	1.46154
GTTGTTGGTTGTTTAGGGTT	38	1.46154
AGCTAATTCCACAATTCAAC	38	1.46154
GGGTACTAGGCCAATATCTA	38	1.46154
GTCGAACATCAGAAACCTGC	38	1.46154
TGATCAAACAACGACTGTTG	38	1.46154
ATGATCAAACAACGACTGTT	38	1.46154
ACCATGACTGAGCTCCATCA	38	1.46154
TGATGATTTTATGGATCAGT	38	1.46154
TGTAGATGCTAAGCGAGAAA	38	1.46154
ACCCTTAGTACACACCTTAT	38	1.46154
CCTGCTTATAGTTGTTTGCT	38	1.46154
AATCATGATGACGACTTCGC	38	1.46154
ACTCTACAGGGGAGTCAATC	38	1.46154
TGTTTAAGTTTTGACTTAGC	38	1.46154
CATGAAATGAACCTAAAACT	38	1.46154
CTCTGTAACTGAGCTCTACT	38	1.46154
GTGGGAAAGTTGACTAGAAG	38	1.46154
GATATTTCCTTTCACAATGA	38	1.46154
TGAGTGAGATAAGCCAAACC	38	1.46154
TATCCCGCGAATTCGAGACC	38	1.46154
GCTCAGCAGTTGCTTTTTCT	38	1.46154
TCAGATACATAACTCTTTTC	38	1.46154
GGTGATGGAAATGGTGATGG	38	1.46154
AATCAAAACCATTGTCAGCA	38	1.46154
AGTTTTCGAATGTGGAAATG	38	1.46154
GTGGAATAAGTTTTCGAATG	38	1.46154
TTCACCAAATACAGACCTTC	38	1.46154
TCAACCAATACATCAATATG	38	1.46154
ATTACAAGGCTTCGGGGTGG	38	1.46154
GAATACAAAACTCTGAAACA	38	1.46154
CAAGTTCTTGAAGAGAGTTC	38	1.46154
GAGTCTCAACAATAAAAAGT	38	1.46154
TTCCTTCTGAACGAGAAATT	38	1.46154
AGCTTAGAACTGTCCCATCT	38	1.46154
AAATGACTTAGGCAAAATTG	38	1.46154
ACATGATCAACTCATCACGG	38	1.46154
GTAACATGATCAACTCATCA	38	1.46154
CAACTGGTCATCTTCGACAC	38	1.46154
ACCTAACGTATATGGGCAGG	38	1.46154
GGCAGTTTCAAATGAAATTC	38	1.46154
TAAGCGCCCGAGGGAGCAAG	38	1.46154
CAGCATTGGTGGAGTGATTG	38	1.46154
AGTGATCAAATTGGAACATG	38	1.46154
GTCCAGATTTCTCGTTCAGA	38	1.46154
GATTCAGATAATGCTGTACA	38	1.46154
GACACTTGAATCATGTAATA	38	1.46154
CAGAAAAAAGGAAAGTTAGT	38	1.46154
AAATCCAGCTTTCTCCAGCA	38	1.46154
AATTTTGATAGGGGAGAAGA	38	1.46154
TTTCTGATAAGCGCTCTCTA	38	1.46154
TTATGTTCGAGGGTAAATCG	38	1.46154
GCACATGTATGCGGTACCGT	38	1.46154
CAGTGCAACATATTTTTGAG	38	1.46154
AACTTTAAGTGAGTAGGGGC	38	1.46154
GCAAATGTTACAGATGATTG	38	1.46154
AAGCTGGAAGAGGAAAAGAA	38	1.46154
AGGATGATTTGCAAGGTAAT	38	1.46154
AATAACCAAGTCACATAGCC	38	1.46154
CGAATTTCACAAGATGGTGG	38	1.46154
AAGATGAGGCAACAAACTCA	38	1.46154
TGGCAAGATGGCTGCATCAT	38	1.46154
CTTTGTGACGTTTGCATAGG	38	1.46154
ATAATGCTTTAATCTCTGTG	38	1.46154
ATAGCATAACATATGAGCAT	38	1.46154
GGTGAAAGATTCATCCCAAA	38	1.46154
ATTCAATCATTTTGCCACTT	38	1.46154
GGTAGCAAAACCTGTCACGT	38	1.46154
GTATGCTGACACAACTCATG	38	1.46154
GAGATTTTGGCCAAGTGAAG	38	1.46154
CATCAAACTTATCTGGTACG	38	1.46154
GTACGAGGATTCTACTATTT	38	1.46154
ATGTTCACTAGTTCAGAAGA	38	1.46154
CTCTATTTGAAACAGGGTTT	38	1.46154
TTTACTGGTTTACCGGTTAC	38	1.46154
ATTGAAAAATGGTAATTCCG	38	1.46154
CCCAAGTTGATAGTCTCTAA	38	1.46154
TTGAGATGGTTTTTCATGCC	38	1.46154
AGACACTGGGCCAGAGGTTT	38	1.46154
AACAAACCCTATGCATGTCT	38	1.46154
AATGAGTTGGAAATTTGATG	38	1.46154
AACCAAGTGACTAAAAAGTC	38	1.46154
GGGCCAATTGAGACAGTTTA	38	1.46154
AAATAAATTGGCACGCCCAG	38	1.46154
CTTAACAGAGTCTGGGGATA	38	1.46154
CGGGTAAAACTTCGACAACT	38	1.46154
AGAGAGGTGAAGGTTCTCCG	38	1.46154
ATCTGCATTTTTCGTAACTT	38	1.46154
TGTTCCGATGTGTATTGTGT	38	1.46154
TGTCATTATGTACTTGAGTC	38	1.46154
AAGATAGACATAACCCGCTT	38	1.46154
TTCAGACCAAAAGTTTGATT	38	1.46154
GCGGTGGCTTTTCCCTCCTC	38	1.46154
AAGAGGGTGGTATAAAGATA	38	1.46154
CTGGCTTGTTCAAGGAGATC	38	1.46154
ACACACACATAACATAAATC	38	1.46154
AGCGGTAAGAGAAGGTCGAT	38	1.46154
ACGTGATAGCGCCCGCCTCG	38	1.46154
AATAACTGTTTGATAACCGT	38	1.46154
AAACTCCCCCTTTTTTATGA	38	1.46154
TCTCTTGAACAGATTATTCA	38	1.46154
TTTTGAGTATTTATCTCAGG	38	1.46154
TTGGATATGAAACACCTAAT	38	1.46154
GAAGACGAGCCTCAGAAGAA	38	1.46154
GATGGAGGAAGATGAATTTG	38	1.46154
GCTTGCGGTTGTGTCCGGGC	38	1.46154
TCGCATCCATCGTACTCGAC	38	1.46154
TGTAGAGTACTACGGACGGG	38	1.46154
AGAGAGCATAGGAACGACCT	38	1.46154
TGGGAGGAAATCTGATCTCA	38	1.46154
GAGGAGACCTCAACAAGTTC	38	1.46154
AAATTCCCCAGGGCATACGG	38	1.46154
AGGCTTCCACCGTATGCCCT	38	1.46154
ATCCAGCAGTGCGTTGGTAA	38	1.46154
TGCATGTACAAGTACATGGT	38	1.46154
ATTTGGGTTTTGGTCATTAT	38	1.46154
GTGAAACCTGTTGGGATTTT	38	1.46154
TTGAAACTAAATGTCTCTGT	38	1.46154
ACTGTTTTACCCCTGTTCTT	38	1.46154
AGTGTTCACAAAAAAGGGAC	38	1.46154
GATTGCTGATAGAGAAATGA	38	1.46154
GTAGTCTCCCGAACCAATTC	38	1.46154
AGTTACCACCAATCCAAAAA	38	1.46154
GAAAGGATACGAACATCCTA	38	1.46154
GAATACGGCCTATGTCCCCC	38	1.46154
CTCTTCTTCGGTGTTTGACC	38	1.46154
AGAGTACCCTCCAGATGCGT	38	1.46154
CGACAACCCCATTCATCTTC	38	1.46154
ATATCGGGCGAAATACCTTC	38	1.46154
CTAAAAGTTCTCAGCTTCAC	38	1.46154
CGTAAGGAAAGGAACATCCT	38	1.46154
TGTTTTGAAAAGCTCAAGGG	38	1.46154
AAAGCCAGAATCACCGGTGA	38	1.46154
CCACAGTTGTAGAAGCCATA	38	1.46154
TTATCATACCACATCTTGTA	38	1.46154
TAGCCGCATCCAGTTGGGAT	38	1.46154
CCTCTTCTCTTCTTCTCCCT	38	1.46154
CCAAGGGAGAAGAAGAGAAG	38	1.46154
CCCACTCTTGATTTCCCCAG	38	1.46154
CCTCTGGGGAAATCAAGAGT	38	1.46154
TCTCTTGCTGATAATTGTTG	38	1.46154
AAGGTTGGGACATGTCTTAT	38	1.46154
ATGTTCTCTTCAAAATCGTA	38	1.46154
AAAACAGAGAAAGAAGTCTG	38	1.46154
CTGGAAAATGGGGACTTTTA	38	1.46154
TGTGGAAATTTTGGCCAATT	38	1.46154
GTCTATGCAACTAGAGATTA	38	1.46154
ATATCTCTTTTCTCTTGTCT	38	1.46154
TTTCTGTACTTCTAACTTCA	38	1.46154
TGCATACTTGATTTTTGATG	38	1.46154
CAATGCTCTAGGTGTGTTTA	38	1.46154
GCTGGTTTTTGATATGGTGA	38	1.46154
GTTTTAAGGGGTAAGGGTAA	38	1.46154
CAAATGGTGACCACCAACTC	38	1.46154
CAATTCTGAATTGCTTGCTC	38	1.46154
GTCTCTTGAGGAAAGATTGA	38	1.46154
GGAACAGATACAAGCGGACA	38	1.46154
ATGCAAACCAGAAAAAACTG	38	1.46154
TATCTCTCCATTTAACCTTC	38	1.46154
CAAGGTGTAAGCGATCGCGA	38	1.46154
GTGTAAGCGATCGCGAAGGC	38	1.46154
GATTGCAAGAACAAAAGCGG	38	1.46154
AGTCTTACATGAAAACTCTA	38	1.46154
AGGATGGATATAAACGTATT	38	1.46154
TGAGGTTTCAAAAGGTGAAT	38	1.46154
CATGAAAAGGCTTAGGATTA	38	1.46154
ACGCTCTGACATGTGTTTTT	38	1.46154
GGGACCACTGGATGAACTAC	38	1.46154
ATCCTCTTTATTTTACCGAC	38	1.46154
TCTCTGAAATCGGCAAACTA	38	1.46154
TGAGAGCAGTAGTGACTTGC	38	1.46154
AATTTTGGGGTGCAACAACC	38	1.46154
GATTCTCATCTCGGGGGATG	38	1.46154
GAGATACAGTCTGCAAACGA	38	1.46154
GGATTTCTAAAGCTGTTTCT	38	1.46154
TTGATGTGGGTGGATAATCG	38	1.46154
GGGAAGGTGTTTGCTCTGTC	38	1.46154
GCATCACAATACACGACAAA	38	1.46154
TCCGTTGTCTGGATTAGATG	38	1.46154
TATCAGAGATGGTTATCGGA	38	1.46154
ACTCTTCTCTGAAATCGGCG	38	1.46154
TCATGTGACCGGTGTTGGAA	38	1.46154
TTGGATGAGTATACAATGAA	38	1.46154
TTGAAGGTAAAACATCTCAA	38	1.46154
TAAGTTCATGTTCATTCCAA	38	1.46154
TGGGGTTTTCCAAAGCAAGT	38	1.46154
TGGGGAATTGGAGGTTTGGG	38	1.46154
CTTTGGAGCCAAAACATTCC	38	1.46154
ACTTCATATTATTGTGTGTG	38	1.46154
ATTGAGCAAGTTATGGCCTC	38	1.46154
CTACAACAAGTTCTTGACCA	38	1.46154
AAAGAAAGGAGCGAAAATGG	38	1.46154
GCATTGATTTTGAAAGTAGA	38	1.46154
TACCCTAAACAATAAAACGA	38	1.46154
CTGCCCCAGGTTAAAAGTTA	38	1.46154
CTTAACTTTTAACCTGGGGC	38	1.46154
TGCTTGAATTTGAAGAAAAG	38	1.46154
AGTGTTGTATTGGTGATGAC	38	1.46154
AGTGTTAGCAAATGTGACCA	38	1.46154
AAAACAACGGAGATCTGCGG	38	1.46154
AACTAGGAAAAGTTTTGGAA	38	1.46154
TTGAAGTATGAAGCAACTTA	38	1.46154
ATTTGAGAAAGGATCCATTG	38	1.46154
TCCCCAGCTCGTTGCTAAGG	38	1.46154
ATCCCCAGCTCGTTGCTAAG	38	1.46154
ATCTAAGGTCCTCGGTTTCA	38	1.46154
ACCAAAAGTAACATAGCTAT	38	1.46154
ACCTACTAAGAGTTGGAGTA	38	1.46154
ACCTTACTCCAACTCTTAGT	38	1.46154
TGAGGGGATCTCAACTTCGA	38	1.46154
AACAGATGTCACAAGGAAAC	38	1.46154
TTAGGCAAAAGGGGGCAGCT	38	1.46154
CATGGCTTTTAGGGGGCTTA	38	1.46154
CTCGGTCCGACACGTTATCA	38	1.46154
GATGTTTTCATCAGATCTTC	38	1.46154
GGCAGAAGTGTATTTCGGCT	38	1.46154
AGTGTGTGAACAAAATGGGA	38	1.46154
GAAAAGTGTGTGAACAAAAT	38	1.46154
TAACACTCGACCATATCTGT	38	1.46154
AACACTCGACCATATCTGTT	38	1.46154
ACACTCGACCATATCTGTTG	38	1.46154
TGAATTGATAAAGACTGTTG	38	1.46154
CCGGCCAAAGATGAATGGCG	38	1.46154
GCAGTGCGATGATTATTCGG	38	1.46154
TCTCCCAATCTCCATTGATT	38	1.46154
GGTGCAATCAAAGCACAACC	38	1.46154
AGAGATCAACATCATATCCC	38	1.46154
TCGTCTGAGTTGAGAGCTTG	38	1.46154
TTTGAAATCGATCGATTTTC	38	1.46154
TAATGAGCAACGTGTTATGA	38	1.46154
TACAGGAGTTTTTGTATGAT	38	1.46154
ATTTTCTGAGGACTCAGCCG	38	1.46154
TGGACACTGGTCATAGGGCT	38	1.46154
TCTGTAATCGCGTTTTCGCT	38	1.46154
TTTGGTGAATTAGGATGAGT	38	1.46154
ACAAGCAAGTAAGCAATAAT	38	1.46154
CAGACTCTGCTGAGGAGTGA	38	1.46154
TAGAAGCATCTGAGATCTCC	38	1.46154
GGTTTTGCTCTTCTTCTTAA	38	1.46154
AGCATACACATAACCTAGAT	38	1.46154
TAGCATACACATAACCTAGA	38	1.46154
GGAGTGTCGAACATATATTG	38	1.46154
AAGTGTTACAGTGAAAACAT	38	1.46154
TTACAGCAACATCAACACAA	38	1.46154
ATGGCTTCCCTTCAAAGGAG	38	1.46154
CTCTTTATACAGCAAAAGAA	38	1.46154
CATTCTTTTGCTGTATAAAG	38	1.46154
TTGGTCATCTGGAAAGGTGA	38	1.46154
TAGGTTATATCTGATGAAGT	38	1.46154
ACCTTTGGAAACTGTCAATC	38	1.46154
AGCTTCTTTCTTTCATCTGC	38	1.46154
GGGGATATCCCTTTGATTAA	38	1.46154
ATGCTGGCTGGTGTCCTTGG	38	1.46154
TGGGTCCTCTCCATGACAGT	38	1.46154
CCAGAAAAGATGATATCTGA	38	1.46154
GCATAGATATCCACAAAGTT	38	1.46154
ATCTCTATACTGCTTGTACT	38	1.46154
TATCTCTATACTGCTTGTAC	38	1.46154
TTGTTTCAACCCCTAAACAG	38	1.46154
TCCTCCTCTTGGTGTTGGCG	38	1.46154
CCTCCTCTTGGTGTTGGCGC	38	1.46154
CCCGCGCCAACACCAAGAGG	38	1.46154
GAACCCGCGCCAACACCAAG	38	1.46154
CGAAGTTATTTCAACGGTTG	38	1.46154
CTTCTCATGCCGAAAATCCA	38	1.46154
GAAAGAGGTAGGACAAATTT	38	1.46154
AAAGAAAAGCTACAGCAAGC	38	1.46154
AATCACTAAACAGAGCCCCT	38	1.46154
ATCAAACCACTTCGAAGGAT	38	1.46154
TATTCTGACTGAGAATGGTC	38	1.46154
TGTACCCATGAGTGGCACGT	38	1.46154
AGATGATCCTTTCAACCCAG	38	1.46154
GCTGTTTGGTAAGGGCTTCT	38	1.46154
CACAGAAATGCTTTTATGCT	38	1.46154
ACTTGCTGAGGAATTGCATA	38	1.46154
GAACCTGTAACTTATCAATC	38	1.46154
CCCAAAAGTAACACACAAGT	38	1.46154
CTTCAGAATGTATGCTTCAT	38	1.46154
AGGGAACATAGGCTGTTGGG	38	1.46154
GGCTATCCCTTGGAGCTATG	38	1.46154
TACTTTGTTTGGAAAGCTTG	38	1.46154
AAAGGAGGTTGGTTCCGACA	38	1.46154
CAATTCATGGCTGGGGCTTA	38	1.46154
CTAACTACAATGCAAATGCC	38	1.46154
TTAACACAAGATCTCCAACC	38	1.46154
ATAGGTCCTAGCTGATTTTT	38	1.46154
TGACTTCTGATCCTATTCAA	38	1.46154
TGATTTGAGATTCATCCACT	38	1.46154
GGGATGGCAACTGATGTGAC	38	1.46154
TCCCTATCTCCCGTCCTTGG	38	1.46154
TTTTGCCTTCAATGATCGAA	38	1.46154
ATGGCTAGAATTGGGAAAAA	38	1.46154
TTGACAATTTGAAGAGGATT	38	1.46154
TTTGACAATTTGAAGAGGAT	38	1.46154
GTCACCAACTTGAAAACTGC	38	1.46154
AGATGCTGCTTCTACCCACT	38	1.46154
CGCGGCCAAGATAACAGGAA	38	1.46154
ATCAACGGTCTTCCAGCAAC	38	1.46154
ACATGAGCATCAAACCATCT	38	1.46154
AAGGAGGTACCTCAGTCTGA	38	1.46154
CGATAGTTTGAGGTCCCTCT	38	1.46154
GCCTGCTGTGATGGGGAAAG	38	1.46154
AAAGCGAGCCACAACCTGCT	38	1.46154
CTTGAGATCTTCAAGAAAAA	38	1.46154
GTTTTGTCGACGGCAAACAA	38	1.46154
AAAGATGTGCGTACTCAGTT	38	1.46154
GCCGTAAACAAGAGAGAAAG	38	1.46154
ATCGGGCTTTAGTCACTTTT	38	1.46154
GATAAGGTTTAGGAACAATT	38	1.46154
TAGATCAATCAAGGTCTTGA	38	1.46154
CAACATCAGGTTTTACCTTA	38	1.46154
TCGACGTGAATGTTGAATTG	38	1.46154
CCCTCAAGCAGGAGAAAGTC	38	1.46154
CCAGACTTTCTCCTGCTTGA	38	1.46154
GGAATAGGAGGTGGTTGTCT	38	1.46154
CTGACCTGTGTTCTGAACTT	38	1.46154
CAGTGTAAGTCATCAGAATC	38	1.46154
GAAGCGCAGCTGGGGATACC	38	1.46154
AATGGTTTGGTCATGTTCTA	38	1.46154
CTGTTGATCAAGGTTCTAAA	38	1.46154
TGCTGAGCGAAAGGGAGAAT	38	1.46154
CAAGTACTGGTAAGAACCCT	38	1.46154
TCAGAGGGATACCTAAGGTT	38	1.46154
CCAAGGCAATGGAGATAGGT	38	1.46154
CCAACCTATCTCCATTGCCT	38	1.46154
ATAGTGTGTGTGTGGTGTGT	38	1.46154
TATTTTTCCATCAAAGCCAG	38	1.46154
AAAGAAAGAAGGCAAAATAG	38	1.46154
AGTATCACACACAAACCAAC	38	1.46154
ATCTCTATGTTGCTTGTACT	38	1.46154
CTGAAGGCAATTGAAGGGCA	38	1.46154
ATAGCAATTTCACTGGGGAT	38	1.46154
TGACGAATTACAAATGGATC	38	1.46154
CTTTGGGAAACATTCCCCTG	38	1.46154
GGTTAGAGAGAATCTGACAG	38	1.46154
ACTTCGCGAAAATGTCTCAT	38	1.46154
ATGCGTTGTCGGTCAAATTT	38	1.46154
TGCCAACACTTTGTCGGTGA	38	1.46154
GGGTCGAATTCCTCTCCAAT	38	1.46154
TGGCTTGAAACCAATTGGAG	38	1.46154
TTCACTTTGATACAGCCTAA	38	1.46154
AAAAATGAAGGCAATGAAAC	38	1.46154
AATGGTTGAGTTTCTGATTT	38	1.46154
ATTGCCTTCTAGTTTTCCTT	38	1.46154
ACACTCGGCCTCCATTACTC	38	1.46154
ATGTCCAACAAAGAAGCTAA	38	1.46154
GAAGCTGCTGACTCTGAAGG	38	1.46154
ATCAAGAAGTAGGGTGGGTT	38	1.46154
TTTGACTTCTGTGGGGAATG	38	1.46154
AGTCTCGGCCGACTGTCGAT	38	1.46154
TGAACTGGTCAATAAGGAAC	38	1.46154
TGAAAGGCAGGAATACCCTG	38	1.46154
ACCATTCCCGGTGCAAGTCG	38	1.46154
CAGGGCATAACGTGCTAAGA	38	1.46154
CTTAAAGAGTTTTCGGGTTT	38	1.46154
GTGCCCTTGAAAGCAATGAA	38	1.46154
TTGTAACCAAGCACCCTCTA	38	1.46154
CTAACTTTCCCATCCTTCTT	38	1.46154
GAACTCCTCAAACGGATTCC	38	1.46154
AGAGAGCATGGAAGTTGGGA	38	1.46154
TAGTACCTTCGATTATGGGT	38	1.46154
ACCCAAGAGCCCAAAACAGA	38	1.46154
CTTATGCTCCACAGAACTTT	38	1.46154
ATTAGAGTGAATCGTCCATT	38	1.46154
GGTCAGATATCGAAGCTAAT	38	1.46154
AAGGATTTCAACACTGAACA	38	1.46154
AACATCTCACCAAGAAAAGA	38	1.46154
AATACACCCTATGACCTGTT	38	1.46154
ATCATGACTTGGTCTTTTGA	38	1.46154
GTTTGGTTTATAAGGGTATT	38	1.46154
ACATTCTGTGAGTTAATACA	38	1.46154
AGAAGAGTATTCTGGAAGAG	38	1.46154
AGGTTGTAGCTTATGCTTCA	38	1.46154
ACAAGGTGATGATCAAGAAT	38	1.46154
TGAAAAGTGGAAAAGGAAAA	38	1.46154
ATGTACTCCATAAATACCTC	38	1.46154
GGTGACAAGAGACCTAGTGG	38	1.46154
GATTCGAAGGTTTTCAGATT	38	1.46154
CTACACACCCAGCCCCCCTG	38	1.46154
CTATCAATACTAACCTGTTA	38	1.46154
CGGCTTACTGTTATGAGGTT	38	1.46154
GCTTTTTTGTTTGAAAAGTG	38	1.46154
AACAATTTCACAACAAACCT	38	1.46154
TTGCACGAGAGAGGATACGT	38	1.46154
AAAAACTCAAAGAACCGAAA	38	1.46154
TAGCCAGCAGGAGTAAAATT	38	1.46154
TGTCTTTGGTGTTGCTGCCA	38	1.46154
ATCATTGGCTCGTACTTCCA	38	1.46154
CACTTGGCCTCATAACACCT	38	1.46154
AAGTTGGTTTCCAAATGGTA	38	1.46154
TCTGCGGGGAGTTTAAAGTG	38	1.46154
AAACCGAGAGAATTCAAAGA	38	1.46154
GCTAATTCTATATCGTGCAT	38	1.46154
AGATGATGTGATTCGGAATA	38	1.46154
CCGGGTTCTGGTCCCTCTTA	38	1.46154
AACATCGCGAGGAAAGAAAA	38	1.46154
AACGGGAAGATTGCCCAAGA	38	1.46154
AGGCCACGTGACGCCCGGGG	38	1.46154
TGTTTAACATAGTAGCAAAG	38	1.46154
GCACGCGTATATTTCTTCAT	38	1.46154
TGGATCGTAGAACTGGACCA	38	1.46154
GGCAAGGATCATTGGTACTT	38	1.46154
ATGAAAACATGAAAATGGCT	38	1.46154
AGCTTTACACGTGTGGAGAA	38	1.46154
TAGCTTTACACGTGTGGAGA	38	1.46154
GAGCAGCTTGATGAGGACAA	38	1.46154
GATTTTGGACCAAGCCTATG	38	1.46154
CCATCCATTCGGCTGTATCA	38	1.46154
AGATCTTGTCGATGAGACAC	38	1.46154
ATTAAATATCTGAAGTCGAG	38	1.46154
GTTGTTGTTATTACTGTGGA	38	1.46154
GAAGCTTTGAACATGTATTG	38	1.46154
GGAAACCCGGCCAACTTTGC	38	1.46154
CATTGTTGGGTAGACCTTTC	38	1.46154
TGAGCGAAAGATCCTACACC	38	1.46154
TTGTGATTGAGATGATGGTG	38	1.46154
CATGTCATGAAGTTCTCTCA	38	1.46154
CCCTATTAGCGAAATGATAG	38	1.46154
CCCCTATCATTTCGCTAATA	38	1.46154
TCCCCTATCATTTCGCTAAT	38	1.46154
GAGATGTTCTCGTTTGAAGA	38	1.46154
ACGACAACTATCAACCAAGT	38	1.46154
GTGCAGCGTATCAGAGTTTG	38	1.46154
AAGAACCTTACCTTGCGTAT	38	1.46154
TAAACTTTGCTGGAGATAGA	38	1.46154
ATGGAGAAATGGGTTTGAGT	38	1.46154
GAGGATGGCTACAAGGCAAT	38	1.46154
TCCTTGAATGGGAACGGTGA	38	1.46154
TTCTCAGATCTGGTGATTGT	38	1.46154
GCCGCTCAAGGGGCATTTGC	38	1.46154
GTTAACAACTGTTTTGGGCC	38	1.46154
ATTGTTTCATGTCTAGCTAT	38	1.46154
TTTTGGGACGGGAGCAGTGG	38	1.46154
AGTGCCTCCTTAGCAGAAAT	38	1.46154
ACGAAGAGTCTACCCAAGTA	38	1.46154
TGATTGGTTGATGAGGTTAG	38	1.46154
ATTGGTTGATGAGGTTAGTG	38	1.46154
GGAGACATGTCTAAAAGGTG	38	1.46154
AAACTTCAAACTGTCTCAAC	38	1.46154
ACATCAACCCTGCAGGCTTC	38	1.46154
ACTTGGCATTGAGGAGGGCG	38	1.46154
ATGAGGACTTGGAATTTTTG	38	1.46154
GTGATTTTTGGGCATGGCAA	38	1.46154
TTGGCTGTTTGGAAAGGATT	38	1.46154
TGAGTTCTTCAGATATGATC	38	1.46154
TATCACTACCTGCGTGGCGA	38	1.46154
GGGATGTGTCCTCGGACAAC	38	1.46154
GGTGATGACAAGACATTCAA	38	1.46154
TGAATGTCTTGTCATCACCA	38	1.46154
GCCTGACTTTGACAAATACA	38	1.46154
AGGATACTTCTTTTCCCCGA	38	1.46154
TGGAAGGTAAGAAGTCTTCA	38	1.46154
AGGATAGTTCATGTTTTGAG	38	1.46154
AGTCTCGAAGCCTCTCGCAT	38	1.46154
CAATTATTGTGGCTGCATAG	38	1.46154
CATTGATTTGACTGATGACT	38	1.46154
TCACACTGAGGAAGAACACT	38	1.46154
CAAGCGAAAAGGCTGTTCCA	38	1.46154
ATATGAGGAAGCTAAGAAGA	38	1.46154
GAAGGTTTGCAGAAAGATTT	38	1.46154
TGCTCGTATGGAACAGCCGG	38	1.46154
CCCTCGCAATACAGCTGATC	38	1.46154
GACACTGTCAAGGCGTTCCT	38	1.46154
CTGTTGGGGATGGACTCATA	38	1.46154
AACACATGTGTTCGCAGCAG	38	1.46154
ATCCTCTGGGGATTTCGCTG	38	1.46154
CCATTCCTCGACCGAATCCC	38	1.46154
GCAACCAAAACAATGGGCCT	38	1.46154
GCATATTTCTTGAAGATTGG	38	1.46154
ATTTTGGAGGGCTGGGAACC	38	1.46154
CATTTTGGAGGGCTGGGAAC	38	1.46154
TGCACTAAACTGCCCCAACT	38	1.46154
CGCTGCTATTGTTGAGGCTC	38	1.46154
ATCTTGACTTCTTGAGGAAC	38	1.46154
GAGGGGTGCACTGCAGGCCA	38	1.46154
AACATCCACCGAATCAACCT	38	1.46154
GGAGAGTTTGTATTGACTAC	38	1.46154
CAAGTGGGTAAGCCCAGTGC	38	1.46154
TGTTTCATGTGTTGCAACTT	38	1.46154
AAACACCAAAACAGCCACTC	38	1.46154
GGAGACTTGTGGATGGAAAG	38	1.46154
GACACGTGCAGCCCAAAAGT	38	1.46154
GCTGCACGTGTCTGCTAAAA	38	1.46154
CAACCCCATCTTATCAAACT	38	1.46154
CAAGTTTGATAAGATGGGGT	38	1.46154
AGCTCCGAGCAGCTATTCAA	38	1.46154
TCAGATTGTGGGACCTCAGT	38	1.46154
AGAAGGTCTGAACCCATTGA	38	1.46154
AGGAGAATCCTAAGAGTTAA	38	1.46154
GATGCAAGTAAATGCTTGAA	38	1.46154
CTACAAAAGAGAATCAAGTA	38	1.46154
CTTGGGTCGAATCATCGCTT	38	1.46154
ACAAGGTATAGTCAGCAAGA	38	1.46154
TGTGAATACTCCTCTAAAGT	38	1.46154
GTGTGTGGACCGACGCGAAG	38	1.46154
AAACGTACTGGGAAAAGACT	38	1.46154
TTGAGGCTCGATTCCTAAAC	38	1.46154
CAAGTCCCAAGGGTAAGACA	38	1.46154
ATGGTATGTGAACTGAGGTG	38	1.46154
CATTCACAACTGTTAGAACT	38	1.46154
GTGAATCATGTCATGGAATA	38	1.46154
CTCAGTAAACCAGATGTGGA	38	1.46154
AGATAAAAGGCCCACTACCC	38	1.46154
TATGCAGGTATTGGGAAGTT	38	1.46154
GATCTCATGACAAAACCAAT	38	1.46154
GAAAAGGGGCTGTCATGTGA	38	1.46154
AAGGAGAGTGGTCTTTTTAT	38	1.46154
GGACGGACGTCATTGTTCCC	38	1.46154
CGTGACAGTTAATGGAGAGC	38	1.46154
AGCGATTGGTCCGCTGCTGA	38	1.46154
TCTGCTAGGAATGTGCTTTG	38	1.46154
CAATCGAACAGCGACTGCTG	38	1.46154
GCCCCCAGTGAGAAAGAACT	38	1.46154
AATGGTCGGCCAGGCATTGG	38	1.46154
TGAGAAGAAGACCCGGGTGT	38	1.46154
AATAACACTACCCATTTGAT	38	1.46154
TGGGGGAACTTCATCCACAT	38	1.46154
CACTGACCCAAACAACACTA	38	1.46154
TGTGGTGTTATCTGACTATG	38	1.46154
AATGTGGTGTTATCTGACTA	38	1.46154
GAAAAGATTAGACTCTTGAC	38	1.46154
AAAAACCAGTACTAAACGGG	38	1.46154
GGTCCGTTCTGGAAAACTCT	38	1.46154
ACAATCCACACATGTTTCTA	38	1.46154
GAATGAATTGAAGAGTCAGC	38	1.46154
GATGGGGATTTTGGAAATGG	38	1.46154
AAAGATACATCTGACAGCAC	38	1.46154
GAGATGATATGCCCCCTGAC	38	1.46154
CGTATGAAAAGCACTGGCTC	38	1.46154
ATTTTCTTGTGCACTTTCTT	38	1.46154
AAATGTATATGCTCTCTAAG	38	1.46154
ATGAATTGGATGAAGATTGA	38	1.46154
TGGTTTGGTCTTTGGTCACA	38	1.46154
GATTTTGATCCTTAGATCAA	38	1.46154
AGTATGTTTTCCATACGAAA	38	1.46154
GTGATTGAAACCTTTATTGA	38	1.46154
TGTTTCCAGGATAGTTTAAC	38	1.46154
GGTTTCTGTAGACACATCTC	38	1.46154
GCGTCAGCTGGCGACTCTGC	38	1.46154
TAGAAGAGGTGAGTTTTTCT	38	1.46154
AAGGAAGTATGTGGGCTGTT	38	1.46154
CTGGGGAATTCTTAGATATT	38	1.46154
CTCGATACGTACCTCGACAG	38	1.46154
CATTCTGTTTTATGTACACA	38	1.46154
GTACCAACGTAAAGCCGCGC	38	1.46154
GAGGTTCCTTGATCCTGACG	38	1.46154
GATTACGTCCTTCGGGAGGA	38	1.46154
CAAAGTTTGGGTTCGAGGGT	38	1.46154
TCTGATATGGCAAGCCCTGT	38	1.46154
TTTCCCCAGTTGTTGTTGCC	38	1.46154
TGTTGCGTAACACTCGGGAA	38	1.46154
TTTCATCATTGCTTTGCAAA	38	1.46154
AAACTTCTGTCGAACTCTCC	38	1.46154
CTGCATTACGTGCTCACGAT	38	1.46154
GGGGAGATAAAGGCACTCTA	38	1.46154
AGATGGTTAGGAAAGGCTAG	38	1.46154
GGACGTGCGCTTCATCTTCA	38	1.46154
AAGCACGACCTATGTACCCC	38	1.46154
TATTCAGCCGCAAGAATCAG	38	1.46154
CGTGGGATGCTCGCCGGCTG	38	1.46154
TGTTTTTGTCTTCTACAAGC	38	1.46154
CCGATGAATTATTGGGATTT	38	1.46154
CCAAAATCCCAATAATTCAT	38	1.46154
CTCAACAACAAAACTTGGAC	38	1.46154
TGATGATTTGGATGAGTCTT	38	1.46154
GATGATTTGGATGAGTCTTA	38	1.46154
GCAGTTTCGCCGAGCGAAGG	38	1.46154
GGCAATTAAGGATTCATGAA	38	1.46154
TCTAATTCCAACCATTTTGC	38	1.46154
CTGATACATAGAGGCTAGCG	38	1.46154
GAGGCCTGGATGAAACAGTT	38	1.46154
TGCCATGGTTGTAGCGTAAC	38	1.46154
TTGGATGAAACGGTTAGAGC	38	1.46154
CTTCATGATGAGCCAACAAT	38	1.46154
GAGACCACAGTTTGTGTGTC	38	1.46154
GAATCCTGACACACAAACTG	38	1.46154
CAGAACTCTTTCACTAAAGT	38	1.46154
GATTCTTTGCAATCAGAGCT	38	1.46154
ACTCGGGCAAATTGAAACAC	38	1.46154
GGTTCCCGAAAGTCAGTGAT	38	1.46154
GAAACCTCTGACTTGCTTTT	38	1.46154
ATTTGTTTGAGTCAATCAAG	38	1.46154
CGAAGAGGTCAAATAAGAAG	38	1.46154
AGTTACCAGAAGAAGAAGGA	38	1.46154
AATCAGGAACAGCCCGTGCA	38	1.46154
AATCATCTTTGCAAGCTTAC	38	1.46154
GGCCTTTGAATGTGAAAAAT	38	1.46154
TTCCCATTTTTCACATTCAA	38	1.46154
AGCACTTTTCTCATTCGAGC	38	1.46154
GATGCTTCTTTATTGGGTTT	38	1.46154
GCGTGGCATCATGTCGAGTA	38	1.46154
GAAATGAGGTTATGTTGCTG	38	1.46154
CAAAAATCATTTTGTCCACT	38	1.46154
CAAACCAATATTACTTCGAT	38	1.46154
ACATGTGGTCCTTGACCGTG	38	1.46154
AGGGATTCACGTTTGGATGG	38	1.46154
AGAACGTCACGAAGTGGGGT	38	1.46154
ATCGGTCATGATTTGGTCAG	38	1.46154
AGAGTCAGTTGGATATTATT	38	1.46154
AAAGTGTTTGATGTATGGTG	38	1.46154
ATCGAAGTTGGTGCGATTGC	38	1.46154
GGTGTTGGCTATAGGGCTTG	38	1.46154
AAAGTTCTATGTTGATGCCT	38	1.46154
GCGCGTGTGTTATTGATGTA	38	1.46154
GCGTGTGTTATTGATGTAAG	38	1.46154
GTTATTGATGTAAGGGGCAC	38	1.46154
TGCATGATAATAGGATTGTA	38	1.46154
CTGATTTGGTTGATAGCTGT	38	1.46154
CAGTGTGATTGCGGATTATT	38	1.46154
GAACAATCCGGAAGGCATCC	38	1.46154
ACAAGTCTATTATGGTGTAT	38	1.46154
TTTTGGTGAGAATTGAGGAT	38	1.46154
TATACTCACAGAATCTGGAT	38	1.46154
TATGCATTGGTCATCTGGAA	38	1.46154
TGTCATTGTGTGAAAATCGG	38	1.46154
TTTCTCTATGCAGGATGTCC	38	1.46154
ATCCATCTGATGGTGCAGCA	38	1.46154
TTCCATGCTGCACCATCAGA	38	1.46154
TACAGATCATGAAATGACGG	38	1.46154
CGAAAGCACTAAGTCAAGCA	38	1.46154
AGTCTGTTGTGGTTTGAGTC	38	1.46154
TAGTTTCTCGAACCAAATTC	38	1.46154
AGGTGAGAGTGTGGTTTTTT	38	1.46154
ACGTGGATTCGAAAAATCTC	38	1.46154
AAGCATCTCCTAGGGCTGCT	38	1.46154
CTTGAATTTGCTTAAAATGC	38	1.46154
AGCACAAAGGGTATTTTGTA	38	1.46154
TCTAGCAGTGGAAGATGAGC	38	1.46154
TCTGGTGGATCATCTACAAG	38	1.46154
AGATCTACAAAGGTTGTTAG	38	1.46154
ATATGATGAATGGAGACTGT	38	1.46154
AAATCCTGTACCTACACTTT	38	1.46154
ACTTCGACCATATTCACTGA	38	1.46154
GTTTTTATACCGCATACCTC	38	1.46154
GAAGAAGATTCAGACTTTTT	38	1.46154
TCTATTTTCAAGGTGAACTT	38	1.46154
TAAATCCTATTGCTTTGTCT	38	1.46154
TAATGACTTAGAGACCCAAT	38	1.46154
TTTGAGAATTAGGGCTTTAA	38	1.46154
AATTGGAAGGTTTGAAGTTT	38	1.46154
AATTCGAATTTCAAAGTCAG	38	1.46154
ACAAACCATTTGTAAAGCAG	38	1.46154
TTTCTTGATCCTCTCCAAGG	38	1.46154
GAGCTCTGGAGTAACAACTG	38	1.46154
GGATTTCAACCAAAGACCGC	38	1.46154
GCTTCTAGCTCAGGTGAAAA	38	1.46154
TTTGATGTATTTGGGCTAGT	38	1.46154
TTCAGCTTCGGTCTGGGCAA	38	1.46154
CTGACTCGACCTAAAGATTA	38	1.46154
ACAGACATCTTGGAGCTTTG	38	1.46154
GAAACTAGATTATGAGTTCC	38	1.46154
TCTTCCAAAACCCATAATAC	38	1.46154
TTGAGGTTTTTAAAGGTGGA	38	1.46154
CTATTTTAAGTTTCAGAGCA	38	1.46154
GTCTGAAGTATCTGTACGCT	38	1.46154
TCTATGTACAATCGATTGCA	38	1.46154
GTATCATCAGATTCGTGTTA	38	1.46154
AAAGGTGAGTTTGAGGTTAA	38	1.46154
TGTGGTGAACTAGGAAAAGT	38	1.46154
TTGAGCAAATCATCGAATTT	38	1.46154
CAACATCAACAATTCGACAT	38	1.46154
ACGTAGAAGTTGTGAGAAAA	38	1.46154
TGACTTGAGAGACCAAGGTG	38	1.46154
TGAAGCATTTGTATGGAAAT	38	1.46154
GATGAAGTGAAATTTGAGCT	38	1.46154
GCGTATCATCCGCAAACAGA	38	1.46154
AAGAGTTTATTTTGGTGGCT	38	1.46154
TTGGCTTTGGTGTAGTGGTT	38	1.46154
AAGGTGAATTGAAGTGTTGA	38	1.46154
ATACATCATATGTGTTGTGT	38	1.46154
TATCAACAGACTCGACAACT	38	1.46154
GAAGTGGTCCAGGCAAAATT	38	1.46154
GGTCCAAATGACACTCAAAA	38	1.46154
TCAGAGTATACACATGCAGA	38	1.46154
TCATGCATACATTTGGACGT	38	1.46154
GCGCGACATGTACAGTTCGC	38	1.46154
CAAAGGTTACAAGAGAGGCT	38	1.46154
TCCAGCATCTGGTCAATGAA	38	1.46154
TCAGCCTCCAAGGAATCCCA	38	1.46154
TCTTGGTCGACATTGGGCAA	38	1.46154
AGGAGGCTGCTAGGGAGCTA	38	1.46154
GAAGAGTTCTTCGTTAGGAG	38	1.46154
AACTTGGGACAGTTAAGTGG	38	1.46154
CCACATTCTCGTTCTGACTA	38	1.46154
TGGCTGCAGGATTTACAAAG	38	1.46154
CCTCATAGTCGGTCAAATTC	38	1.46154
CCTGAATTTGACCGACTATG	38	1.46154
TTGGGACCATGGTCAGAATA	38	1.46154
AGCAAGTTTCATGTGGCAAA	38	1.46154
AGTTGGGCAGTTTTGATGTA	38	1.46154
TGACTCTTCTAAGGCTTTTA	38	1.46154
TGTATGGTTTGATGATAGGG	38	1.46154
TTTCATCATAGCACACGACA	38	1.46154
TTCATCATAGCACACGACAT	38	1.46154
GAGGGATAATTTGACAATTG	38	1.46154
GTGAAGGTAATCAATTAGAT	38	1.46154
ATCTTCGTATGGATTATATC	38	1.46154
CCAAAGAAAGACCAGAAGGG	38	1.46154
TTGGCCATGAGTGATGGTTT	38	1.46154
ATTGGCCATGAGTGATGGTT	38	1.46154
GATCTGATATTGCTGCTGTT	38	1.46154
[truncated: 58,001 more rows]

## Sheet: Guide Pool 2
gRNA target sequence	number of targets	Relative frequency
TGTATCCTAATAGGATTGTA	34	1.30769
CGCGCGAACTGAGTGAAAAT	34	1.30769
GTGCCCATGAGTGGCACATT	34	1.30769
CAGAACTTTGGCGTAAATCT	34	1.30769
CGGCGCGAACTTGTGTGACG	34	1.30769
TCAAAAACACTGCTGAATTG	34	1.30769
AGGAACTCATCAGCTCTCTA	34	1.30769
AGAGATAAGAGGAAAACACA	34	1.30769
TTTGAGGATTAGGGTTCTAA	34	1.30769
TTGGTGGATGGGTGTTAGTG	34	1.30769
ATTGGTGGATGGGTGTTAGT	34	1.30769
GATTGGTGGATGGGTGTTAG	34	1.30769
TGGTGGTTCAGATGAGGATG	34	1.30769
ATACCCTTGATCCAAACCTT	34	1.30769
ACTCCGCTTGGGGATAATAT	34	1.30769
AGCAGGGATGAAAGAGACGA	34	1.30769
GGCTATGTCGCAAAAGGACA	34	1.30769
CGAAGTCCCTAACTTTTGCC	34	1.30769
AGCAGATCAGATTATCAGAG	34	1.30769
CTTCATTGGGCCACTTAACT	34	1.30769
TGTTGAGAATATTGCTGGTA	34	1.30769
CTCATTGAGATTGGAACTTG	34	1.30769
AATCAGGTGGGGGGACCAAT	34	1.30769
TGTAGAACAAGATATAACAG	34	1.30769
TCCATACCTGAGATTTCTGT	34	1.30769
TCTAGAAATCGACGCGTTCG	34	1.30769
GTTGCATACGGGAATGTGAA	34	1.30769
TATGTCCGCCATTCGTGATC	34	1.30769
CAATGGTTTGTTCAGAGATT	34	1.30769
TGGGAAAGCCTGTCTTGCTG	34	1.30769
ACATCGACGGAAGATACCAT	34	1.30769
GAAATGTGAATTTTGGCTGA	34	1.30769
TCTGATGCAGGGCGCTTCAT	34	1.30769
ACTCACGGAACTCAAATTAC	34	1.30769
CTCTGGGTGCAGTAGACTCT	34	1.30769
CTTTATTGTTGCCCCGAATG	34	1.30769
GGTGAAGATCTTAAGAGGTA	34	1.30769
TGATGTTCTTTTGGTTTTGT	34	1.30769
GTTTGGGCAATCCTAAAATA	34	1.30769
CTTGGATGTAGGAGGGCTAT	34	1.30769
CCTACCCCGAGTGAGGATCC	34	1.30769
AGAGTTGGTGGATATGTTTA	34	1.30769
TAAGGCCGACTCCAAAACAG	34	1.30769
AGCAAACATCGCAAAAACTT	34	1.30769
GGTTGAATTCTCGAAGAATG	34	1.30769
GGATTGTATGAGTCGACTCA	34	1.30769
ACATAATATCCTGGGTGTGA	34	1.30769
CATTTTTCTTAGGATGGTTT	34	1.30769
GGTCGAATAAATCAGCCCAT	34	1.30769
TGAGGGGAAATTTGTTAGCT	34	1.30769
TTCAAGATACTTGTGACTCG	34	1.30769
TCAAGATACTTGTGACTCGT	34	1.30769
CAAGATACTTGTGACTCGTG	34	1.30769
TCTTTTGGCACGCATTCAAG	34	1.30769
GCGCCGCGAACAAAACATTA	34	1.30769
AATAAAATTTTGGTGGATGG	34	1.30769
CCAAAGATACCTTGAAAGGT	34	1.30769
TCGAAAAGATTTGGATAACT	34	1.30769
GAAAGTAGACATAGAACCTT	34	1.30769
CTTCTGCCATGTAGTAACTC	34	1.30769
GGATAATTCGGAGATGAAGA	34	1.30769
AATTTCTAGCAGAACTACGT	34	1.30769
AAATTTCTAGCAGAACTACG	34	1.30769
ATCAGAACGAAGGGAGGATC	34	1.30769
TGAGATGTGGTGACTTCATT	34	1.30769
ATTAATAACCCTAAGCTTAG	34	1.30769
CAATAGCTTCCTGAGCATCA	34	1.30769
CTAAGGGTTTACCTGCCAAA	34	1.30769
TTTAAGCAAAATTCGGAAGG	34	1.30769
CATTGGATGTACATCATATT	34	1.30769
GGAAGCGAAGTTTCGAACTG	34	1.30769
AAAAGTTTGGTGACCGTACT	34	1.30769
TTAGTTGGGCTTAAGTTAAG	34	1.30769
GGCTTTGTGGTCCACAAGAA	34	1.30769
CTTAGCATAGCAGTCTTGCT	34	1.30769
AAAAACAACTTTACGACCAA	34	1.30769
TCAGTGAGGCCAGAGCAGCA	34	1.30769
GGTCTATTACTTCCTGACTA	34	1.30769
TGTGAAAAACATCGGTTTTC	34	1.30769
ATGAAAGATCCGTCCCTGCC	34	1.30769
CTAGGATATGAATGAGCTAT	34	1.30769
TGATGGACCAAATTGGGGTC	34	1.30769
TTTGCCTATATTGCCCTTTC	34	1.30769
GGCAGCCTAGGTGCAATTTT	34	1.30769
TCATTTGGCACCCATGCTAA	34	1.30769
GGTGAAACTCCCATTTGTCT	34	1.30769
TCACCAATTCAACCCGCTCA	34	1.30769
TGGTTGGGATGCTTTTGGGC	34	1.30769
CAGAGCGGAGAAGATCGTGC	34	1.30769
GGTTGATTGCCAAATGATAC	34	1.30769
TAGTATGCTCAACTTCTAAA	34	1.30769
ATTGATGAAGGCAGAGTATG	34	1.30769
GGAATGGCGGCCATTGCAAG	34	1.30769
AAGGAATGGAGGAATATGAT	34	1.30769
ATTCCCAAACTACTTCATCC	34	1.30769
GTTTTTCGCGTGGTCTCGCT	34	1.30769
AAATCGTGTTTTATGGTGGT	34	1.30769
TGAAAAATCGTGTTTTATGG	34	1.30769
ATACAAAATCCTTGTCTGAA	34	1.30769
CTCACTACTTTCTAATGGAT	34	1.30769
AGGTACTTGGCAGGGTGGTT	34	1.30769
CAGGTACTTGGCAGGGTGGT	34	1.30769
CTGGAGGAAATTCTGCTTCT	34	1.30769
GATGATGTATGGTATTTGGA	34	1.30769
ATGATGTATGGTATTTGGAT	34	1.30769
TGAGGTTTTCACATATGACT	34	1.30769
TGGTTGGCCTGGCAGTGCGT	34	1.30769
GCGTACCGAACCTGACCTTT	34	1.30769
GTTAGGGAAAATGAACTGGG	34	1.30769
TCAAACATCCTAATTGACAC	34	1.30769
AGGAGAGGCCAATGATTGGT	34	1.30769
GTTATCCGAATGTAAGAATG	34	1.30769
TTTTCAAGGAAAGTTAGCTG	34	1.30769
AAGTCAGGAATTTAGGTCAA	34	1.30769
GGAAAGTTTGGAATTGGTGA	34	1.30769
GTTTGATTTTTGGATTCTCC	34	1.30769
CTAATCTCAGTAATTGACTT	34	1.30769
TTACGAGATTTCACATACAA	34	1.30769
CCGGTTTTCAATTTCATTGT	34	1.30769
CAATGGCAACGATAGGGTCG	34	1.30769
CTTTGCGTCGACCCAATACT	34	1.30769
TCTGCTTCCGGAAGTCTGTT	34	1.30769
CATTATAATAGTAACCACAC	34	1.30769
AGGGGATTTCGACTTCGACT	34	1.30769
GAGAAGAATAAATCATACAG	34	1.30769
TGAAAATACCTGTACAGTGG	34	1.30769
GTTCACGATTTTAGAAACAA	34	1.30769
TCAAGATTTTTGCATTCTCT	34	1.30769
ACGTGGACAACTATGGTTTG	34	1.30769
CATAAGCACCCTTGAACGTC	34	1.30769
ATAAGATGAACGGTGCGTAG	34	1.30769
TGCTTTTATGGCAAACACAG	34	1.30769
TGAAGACATGGGTGTCACAC	34	1.30769
TAATATAACTCAATTTGCCG	34	1.30769
AATATCTGGGAAGTACGACT	34	1.30769
ATTTCTGCGTGTGATTCATA	34	1.30769
GGTTATACCAAACTGGAAGA	34	1.30769
CGTCCAATTTTGTCTCCATT	34	1.30769
ATGTGACTGCGACTGCTTGA	34	1.30769
CAGGGAATAACCGACTCTTC	34	1.30769
TCTTTGGTGAAGGTTGTTTG	34	1.30769
GGGAGTTTGTGCTAGATATC	34	1.30769
CTGTTGTTAATATTCGGGTA	34	1.30769
ACTGTTGTTAATATTCGGGT	34	1.30769
TATGTGATGTTGGATGTTAA	34	1.30769
AATCATGTCACTCACTCACT	34	1.30769
TCATGCTGGCGGACATGCCA	34	1.30769
GAAGATTAGGGAAATACCTA	34	1.30769
CTTGAATTCTCTATTGATGA	34	1.30769
ATGATACTGTTGGGGAAACA	34	1.30769
AATCTAGTTGTTATGTCTCC	34	1.30769
CCGTTGAATCACAAGGTAAG	34	1.30769
TACCAAAGACAGCACTCATG	34	1.30769
AATCTGGATTGGTGCAAAAT	34	1.30769
ATCAACTATCGATCCAATTT	34	1.30769
GATGTTACCCCTATCATATT	34	1.30769
TCATATGGGCTAAATATAGA	34	1.30769
GTACGATGTGCCAAATGATA	34	1.30769
TTTCCTGCAGCCATATCATT	34	1.30769
GTTGAAGAATTGGGATAACT	34	1.30769
TGATATAGGGATGAAGTGCC	34	1.30769
TTTACCGTTAAATAATTCGG	34	1.30769
TTTTGCTGATATTCTAGGGG	34	1.30769
GTGGAATGATTGTTATGAAG	34	1.30769
ATCTTCGACTCTCATTTGAA	34	1.30769
GCAAAGTACGCTGGTATGTC	34	1.30769
GTGAACACTAAACTCAGTTG	34	1.30769
TTCCATCTTTTCTATGCTTA	34	1.30769
TTTCTGTGTGCAGGTGGGGT	34	1.30769
AGATCATAGTAGGAGAACTG	34	1.30769
GACTACCATAGCACGTTGGT	34	1.30769
CTACGTATCCTCGGGTTTAG	34	1.30769
CTCTAAACCCGAGGATACGT	34	1.30769
GAAAGAGGCAGAATTCGTGG	34	1.30769
AGGGGAGATTCTTAATCTCA	34	1.30769
AACCCCACCTTTACCTGGTT	34	1.30769
CTTTACCTGGTTTGGATCGA	34	1.30769
AAGGGGTGACGACCGGGGCA	34	1.30769
GACAAAGGCTCAGGTCAACT	34	1.30769
AACAGAAGAGTTCTGGGAAC	34	1.30769
AAGTTTCTTGGTGAATCCCT	34	1.30769
ACACCCCTCGAGGAAAGAAG	34	1.30769
CGAACTCACAACACCCCTCG	34	1.30769
AAGAGCAATCTGATGAGTGT	34	1.30769
GGGAACATGCAAACGCATTG	34	1.30769
AAAAGGAGGATGCCGGGAAG	34	1.30769
CGCCAGACAATCTGATTTGA	34	1.30769
GGAAGCTATCAGTTTCTGGG	34	1.30769
CTCGCATTTTTCCTTTGTTT	34	1.30769
TTTGCGCATTTGAATTAATC	34	1.30769
TGAGATGTCTGACTGAGTAA	34	1.30769
TGGACTTACCGATTGATACT	34	1.30769
GACATTGTTGAGACTTTAGT	34	1.30769
TGGGGAAAACTGGTCTTGCT	34	1.30769
ATGAGGAAATGATTCTTGAC	34	1.30769
GATTGAGTTTTAAAGCCTTA	34	1.30769
TTTTCAAAGGAAGTGTGTCA	34	1.30769
GTGGAAATAAGAAAAGAGTG	34	1.30769
AGTGGAAATAAGAAAAGAGT	34	1.30769
ACATGTCAAGAAAGTCAGGG	34	1.30769
AAGGTGTTTTGATGAAGATT	34	1.30769
GGTGAGCGACGACTAGCTGG	34	1.30769
TTTGTGAACTGGTTGGAATT	34	1.30769
GCATTTTGTCTGCATAAATC	34	1.30769
TTCACCCGTGAGGAGGGGAA	34	1.30769
GTCGAGGATGCGTTTTGCAC	34	1.30769
CTGTTGGAGATCTACCAAAA	34	1.30769
TTTACGGTGCACATGGTTCT	34	1.30769
TCAATATAAACACCGATCCC	34	1.30769
ATCAGAAGAAGGTCATCTAG	34	1.30769
ATGTGAATATCCAAGAGGAC	34	1.30769
TGGAGTTAACTTGTTCATGA	34	1.30769
TTGTTGAGGGAGAGAGGGAG	34	1.30769
TCATACCACTCATTCTTGAT	34	1.30769
CGAGTTACCTAACCAAACCA	34	1.30769
ACAGAAGGAAAACAATTAAG	34	1.30769
CTTATCAAAGGAAAACCAAT	34	1.30769
CGATTGGTTTTCCTTTGATA	34	1.30769
CCGAGATCATCACCACAGTC	34	1.30769
AATGGGGCTTGGTGTTTGAT	34	1.30769
CAATGGGGCTTGGTGTTTGA	34	1.30769
GCTTCAGCGCTTTTCTGACG	34	1.30769
AGAGATTGCTCTTGTGAGAG	34	1.30769
TTGAGGAGCTCCAGTGTTGT	34	1.30769
TGTCATGGGTTTTACAAGGC	34	1.30769
ATAGGCGAAAGGGGGCAGCT	34	1.30769
AATAGGCGAAAGGGGGCAGC	34	1.30769
AGGTTTCACAGATTTGGTCA	34	1.30769
TTCACAGATTTGGTCATGGC	34	1.30769
AAGCAGGTATTAAGGCCGGA	34	1.30769
CTTCAAAGATGTACAACCGG	34	1.30769
ATGGAAATGCTATGCGATTT	34	1.30769
ACTGGTCGAGCTTGTGACAT	34	1.30769
CAGACATTCTTCTAGCATAT	34	1.30769
CAGTGAAGATCCCGAGGTCC	34	1.30769
AGAGCAAAGTGAAAGAGAGA	34	1.30769
GCGCTCTCCTTAGAGAATAA	34	1.30769
CTCTTCTCGTTCAAGCAGTC	34	1.30769
ATGCTCCCTTTTTCTCTACA	34	1.30769
CTTAACATCTTCTTTCAAGG	34	1.30769
CTCATGTTCATATAAATCCA	34	1.30769
TGAATATTCATCTTTAGGTG	34	1.30769
GTTTGGTGATGTATTTAGTC	34	1.30769
TGAAGAGATGAAACTCTGTG	34	1.30769
AGGATCTGTGACCCAGATGA	34	1.30769
AACTACTAAGGGACTTGTTT	34	1.30769
GACACACAACTACAACACAA	34	1.30769
TCGTTGATGGGATTATCTAT	34	1.30769
TTGAATCAAGCCTTCATCTT	34	1.30769
CTTTTGTCAAAGATTGACAA	34	1.30769
GGATCAAAAGAGGTCCTTTG	34	1.30769
ACACCCTGAACTGGCAAAAT	34	1.30769
ATGTCCTGGCTTTCTTATAT	34	1.30769
CCGTCAACCGCCTCGACAAC	34	1.30769
CGGCGCGAAGGTGGTGGCGT	34	1.30769
TATGATCCCGATGGAGCTTT	34	1.30769
AGCAATGATGGTTAAAGAAT	34	1.30769
CTGCATTTAGGACTCGTTAT	34	1.30769
AAAAATCGGGGTGTTACAGA	34	1.30769
CTGGAACCATGTTCATCGTA	34	1.30769
AAACATCATTCCCTTTTTCT	34	1.30769
AGTTCACCTCAAAATTGGAA	34	1.30769
GCTACAACCTGAGTAGGTTG	34	1.30769
AGGGTGGCTCTAAGTTTAAT	34	1.30769
TTGCGGTAGTGTCGAAATGA	34	1.30769
TTAGTTGGAAATATCTGACC	34	1.30769
TTCTGTTACCAAGAATGTTG	34	1.30769
GGTAACTCTGGGTTGAAGTT	34	1.30769
ATACTTTCATTAAAGCTGTG	34	1.30769
ATCGTTTTGATTGGGGAGAT	34	1.30769
GATCGTTTTGATTGGGGAGA	34	1.30769
GAATACTCAAGATTCTGCTT	34	1.30769
AATACTCAAGATTCTGCTTG	34	1.30769
TCACAAATGTCAGATCTATG	34	1.30769
GTCCGTTAAGTATTTTTGGT	34	1.30769
CCTAGTGTTGGGGATCGGTG	34	1.30769
CCTCACCGATCCCCAACACT	34	1.30769
GCGCCGCGAATCGCGATTTT	34	1.30769
GTAAAGGTAAAGCTTTCATT	34	1.30769
ATGAAAAGGCTTAGGATTTA	34	1.30769
GTCTTGTTTTGCAAGAGTAT	34	1.30769
CATTATCCAGCAGGTGAATC	34	1.30769
CTCTTAAGAGTTTCGGGTCC	34	1.30769
GGCTTGACCCATTAGAAGTT	34	1.30769
TAGTTTTTGAGCTTTGCCTT	34	1.30769
TGAGGTCAAAATGGGGCATT	34	1.30769
GGTCAAAATGGGGCATTTGG	34	1.30769
TTATCAGCTTCACCTTGGGC	34	1.30769
GTATCCGAATGTAAGGTTGA	34	1.30769
AGACTAAAAACCCGAAAGGG	34	1.30769
AAAATAGAGAAAGAAGTCCG	34	1.30769
AGAGACGAACACCCATGCAA	34	1.30769
AATTACCCTTGTGGTAATGT	34	1.30769
TGCTTTGAATCTTTCTCTTA	34	1.30769
GTTCATTGGGCTGAAACGTG	34	1.30769
TTTGGACCTGTCATGTTTTG	34	1.30769
AGGGTGTTGGTTGAGTGGTG	34	1.30769
ATTGGGTGGTTAGCCCTTTG	34	1.30769
TTGCGTAATAGCTTGAAGAT	34	1.30769
ATCAGGAGGTTTGGATCATT	34	1.30769
CTTGTCAAGAATGAGGCCTA	34	1.30769
CAGCATTGGTGGAATGATGG	34	1.30769
GTCCTTATGAGGAGGAAATG	34	1.30769
GAAAGTATCCGCGACTCTCC	34	1.30769
TGATACGTGTAACACTTTTT	34	1.30769
TCATAGTTGCTTGGTGTCTT	34	1.30769
GTTAGCAAGAGATGGTGGTA	34	1.30769
CACTTGACTCTAATCAACCA	34	1.30769
TACCTTGAGAAACCAAGTTA	34	1.30769
CGAATGGTCATCGGTATAAG	34	1.30769
GAAGAAGAATTACCCATGCT	34	1.30769
ATTACCCTGAAGTGTGGGAA	34	1.30769
ACGTTGGAGTTTAGTAGCTC	34	1.30769
GGACGTTAACACATGCAGAA	34	1.30769
CTCTCACATACCTCCTAAGG	34	1.30769
GAGGAGTGACTATAAGATTG	34	1.30769
TGAGACTGTGCGTACCAGAA	34	1.30769
CCTCTAGTCTGATCCTTCTT	34	1.30769
AGCGCATCAGATGTTGGACT	34	1.30769
GTTAGATTCGTGATGAAATT	34	1.30769
TTGAAGTCTTCAAACCCCAG	34	1.30769
TGCATGATGCAGGACTGACA	34	1.30769
TAGGCCTATAATGATGATTT	34	1.30769
AGGTCAATTGGGGATGGTTG	34	1.30769
TGAAGTACAACTTTCCTCCA	34	1.30769
TCATCCAGGTAAAGCAAATG	34	1.30769
ATGAGGACGGTGACTTAAGA	34	1.30769
TAGGTCATTTTGGGTGTGTT	34	1.30769
GATCGCCAAATCTCATTCAG	34	1.30769
CATTCCAAAGGCTCATGTTG	34	1.30769
GTGATTAGAAACAACAGAAA	34	1.30769
ACTCAATTTCTTTGCCTCGG	34	1.30769
AGAGTGAAACTTCAAGGTTA	34	1.30769
TGTCATGAGCTAGGAATCAA	34	1.30769
AGGGAAAAACACGGATCTTC	34	1.30769
TCTGCATGTCTCTCAGGGAA	34	1.30769
TTCTGGGCCTACCTTCCTAT	34	1.30769
TTTGCCTTTTCGAGAGAAAA	34	1.30769
CTCACAAACTTTCACAAAGG	34	1.30769
GAACTCACAAACTTTCACAA	34	1.30769
ATATGTGATGTGCAGATGGT	34	1.30769
TTGGAAAATGGGCATATGAT	34	1.30769
AAGGCACAACCCCTATTCCA	34	1.30769
CCATCTGTCCCTACAATTAC	34	1.30769
CCACAAGTAAACCCGCTGTC	34	1.30769
CAGACTATGGAGTCTTTAGA	34	1.30769
CCTCTAAAGACTCCATAGTC	34	1.30769
AACATTGGAAGGCAATCACA	34	1.30769
TCTGTCTGCTTAACACATCA	34	1.30769
TTTTACTTCCATAATGGCTT	34	1.30769
TAATCATGTGATGACTTTGC	34	1.30769
AGGTGCAGAAGTGGCGGGTT	34	1.30769
GAAATTAGTGAGATTTACGG	34	1.30769
GCTTGGATTGAGCAGGTAAG	34	1.30769
TCTTTGGCTTCTCTCCGAAT	34	1.30769
GCCATAACTTGCTCAAGTTT	34	1.30769
TTTATTAGGATGTGATGCGG	34	1.30769
ACCTTAGTGCGTACTTCAAC	34	1.30769
GGTTTAGACTTTTGAAATCC	34	1.30769
ATTCACTTGCTGGCACATGT	34	1.30769
AAGGGAAGACTGAAGGTGAA	34	1.30769
TGATGAGACTGAGATAACTT	34	1.30769
ATTGCTGCTGCTGCTTGTAC	34	1.30769
AGTTACAGAGGTTCTGACAC	34	1.30769
TCTTCACGATCCTACTGAAC	34	1.30769
GCTTGGTAGCCTCCAGACGT	34	1.30769
GTAACATTTTGTCATCCATG	34	1.30769
GAATGAATTCTGATCGAAAT	34	1.30769
AGGGTTCAACGTCACGAGCA	34	1.30769
TCAGCCAACTCTGTATCAAC	34	1.30769
TTTCATTATGTCGGTGTTGT	34	1.30769
TGACGTTGCTCAATCAAGGT	34	1.30769
CATGCTGTAAGTCAAAAGGA	34	1.30769
CATCACACCTCCTAGGAAAC	34	1.30769
GATTGCAGGTGTGCATGACC	34	1.30769
GAGTTCCGGGAATCTGTTTG	34	1.30769
ACCGCACAGGTAAGCGTCCA	34	1.30769
AATCAACCGCACGACTCAAA	34	1.30769
AAGTCCTTAAAAACAAACGA	34	1.30769
AATTAATAAGAGTGGAGGTG	34	1.30769
TGAAAGTTGCATGATCATTA	34	1.30769
GGATTCGAACCCAGAACATG	34	1.30769
GGGATTCGAACCCAGAACAT	34	1.30769
TATGCTAAAGAGTGGGAATT	34	1.30769
ATCAAATTACCAACCAATCT	34	1.30769
CAAACATGGTCATGATATAA	34	1.30769
CGTTACCAACTCACAAATGA	34	1.30769
AAGTTTCTTGTTGTTTTAGG	34	1.30769
AGTTTTTCCGTTAGAGAAGT	34	1.30769
AGATTTTTGGTAATCAAAGC	34	1.30769
CTTTCTGGCTCTCTTGTCAC	34	1.30769
AATATGAAGCCTGTATCATG	34	1.30769
CAACTTCCGTTGTTTGTCGG	34	1.30769
GTTTGGTTCGAGGAAGTTCG	34	1.30769
GTTTACCTTCGTGGTAATGA	34	1.30769
AGACTATGTGCCAGCATTAT	34	1.30769
TTCATTTCAAATCATTGGCA	34	1.30769
GGAGAGGGATATCTCTGTTG	34	1.30769
TTGGGGCAAGACAACTGACT	34	1.30769
TGCCAATGTCACTAAACAAG	34	1.30769
GCCGATAATTGATGACTTGA	34	1.30769
GAATCTGATACCCACGCTCT	34	1.30769
GAAGACTTACTTGGTTGCGT	34	1.30769
GGAAAATCAAAAGACGAAGC	34	1.30769
CTTCACGAAAAATGAGATAA	34	1.30769
AGTCAAAAATGACATCTCTG	34	1.30769
TACTACAAATGTTGTGTACA	34	1.30769
TGTTTCAAATGTGGGAAGAC	34	1.30769
TTAGTAAACTACCTTGTGTG	34	1.30769
ACAAGACACTCTTCCTAACT	34	1.30769
AATTCGGCCAATCTCTCCAA	34	1.30769
GGGGTAAACATCAACAAATA	34	1.30769
CACAACATGGGATAAAGAGA	34	1.30769
CAAGGTCACACACATAAGGA	34	1.30769
ACAAGCAGAGTGACCAGGAG	34	1.30769
AACTGGAAACTTGAAGCACT	34	1.30769
GACTCTACAGTTGAGAGAAT	34	1.30769
ACATACAAGCGAGAGGAAAT	34	1.30769
ACGGTACCCATGCAAGGCAA	34	1.30769
ATGGGTGTGATTAAGTAAAT	34	1.30769
GGGGTAGCCTCTTGAACAAC	34	1.30769
GATGCTACGCTCTTTGAGAT	34	1.30769
CTTACAGCTGTTTGTTGGGA	34	1.30769
GGCTTGATGAGATGTGCACG	34	1.30769
AGCCATGGTAGAAGCGTTGG	34	1.30769
TCAGAGTGGGCATGATAGAT	34	1.30769
AAGATTTGGACCTTCAGAGT	34	1.30769
CGAACATACTGTGGGACCAC	34	1.30769
GAGAAGAAAGAAGAACGAGA	34	1.30769
ATTCATCAAACTACAAGGTA	34	1.30769
TTCACGTCTATGAATTGGTC	34	1.30769
TTTTGGGCAGTGTGAGGTTT	34	1.30769
CTGACACGACTTTATGCATG	34	1.30769
TTTTTACCATAGGGTCATCG	34	1.30769
TACCTGCATGTCGCCACCCG	34	1.30769
ATAATTGCCATACAAATGGG	34	1.30769
TGGGGGAGGAAATTGAAGAA	34	1.30769
ACTGAAACAAGTGTGACGAA	34	1.30769
ATCTGCAATTGTCCCAGTGA	34	1.30769
TTTATCATTGCGAGAGTAGG	34	1.30769
AGCATTCGGAATCGTGACTG	34	1.30769
GAAAGGATCAAGGTTTGACT	34	1.30769
CAAGGTTTGACTTGGATGTA	34	1.30769
TATATGGTCAATTTGCTGTT	34	1.30769
ATGGTCACCTTACCTTGCTG	34	1.30769
TGGGATGTGGTTTCCCGTCG	34	1.30769
TAGCATCCTCTCCCAATAAA	34	1.30769
TTTAGAGGATGAGGTGAAGA	34	1.30769
GAAGGGAATGTTCTAGAAGT	34	1.30769
GCAGCAGAAACCCAGATACC	34	1.30769
AAGAACCCTGCACCCTCACA	34	1.30769
TTGGTGTTTTGGTGAATTAG	34	1.30769
GAGTAAGCTCAAGAATTACA	34	1.30769
CTACTTTAGGACTTATTTCC	34	1.30769
CTGTTGCAGAGGAATTCGTG	34	1.30769
TGCAGAACATAAATAACACC	34	1.30769
CGCCGTGAATCGCGAATTAC	34	1.30769
AATAAGTCCATAGCTTCACT	34	1.30769
GTCTAAACAGTCAAGAAAAG	34	1.30769
GAAGACCATGGATTTTTGGT	34	1.30769
AGCGGCCGTTGGAATCGCAA	34	1.30769
CGCGACTTACTGGGAATGGT	34	1.30769
AGGCTAGGGTTGAGTTGTGA	34	1.30769
GAGGTGAATTTGGTGAATTT	34	1.30769
GATGGAGGCATTATAGGTCA	34	1.30769
GTGATGGGCAGATGGTTTGT	34	1.30769
ATTTTACCTGAACAGGATTA	34	1.30769
GGCGGGCACTCGGGCTTCAA	34	1.30769
CAGTTTCGCTCAGCGAAGGG	34	1.30769
CCTTTCAAGCCCATATCACT	34	1.30769
GATTTGATATTGCTGTTGTT	34	1.30769
GAAGGAAGCTTGAGGGTTTG	34	1.30769
TGGTGACTACCTTTATTCTT	34	1.30769
TGCTGTTGAAAAGGGCGTGC	34	1.30769
ATAACTTGGGGTAGTATGTG	34	1.30769
CAAACAATTGACAAAAGTCA	34	1.30769
GCTAGTAAGCGAGGGGACGC	34	1.30769
TGACATGGGATTGAAGTTTT	34	1.30769
CTTGTTGCATATTATCTGTA	34	1.30769
TTTTGCTTTCTCTTCTTTGA	34	1.30769
TTTGCTTTCTCTTCTTTGAA	34	1.30769
AGATGAACAAGCTGGTGAAC	34	1.30769
ACTAGGGGAAAATCACTTTT	34	1.30769
CTCAAAGTCCAGTAGTGTTC	34	1.30769
TGTGTCGGGACGGTGGCTAA	34	1.30769
TTCTGTGGTTTGGTTTGATG	34	1.30769
CTCACAATGTTTTCTTTTCA	34	1.30769
TGAGAACTTAAGAATGAAGG	34	1.30769
TTTGCAATTAATCTTGTACC	34	1.30769
CAATGAAATGAAGAGTTGGA	34	1.30769
AGGCTAGAAAAGAGACTTTT	34	1.30769
TAGGTGTGGTTTCACCAAAC	34	1.30769
GGATTACTCTTTAGAGAGGT	34	1.30769
AAAGTGGTCAACATGAAAGT	34	1.30769
TTGCCATCCTTCTTCAGAAC	34	1.30769
CAGAAGTAACACGAATATAG	34	1.30769
AACGGTTTCAACAACCCTGC	34	1.30769
AAGGAACTTGCTGATGAAAT	34	1.30769
AAAGTGTGTATGATAAGAAG	34	1.30769
GCTCGCACCACTAGATCACT	34	1.30769
AAGTTTTGAGGTGTTTGCGT	34	1.30769
TGGGTATGATTGTTGTGTGT	34	1.30769
ACAATGATTCTAAGGGCCAG	34	1.30769
AGCCTCATCATCTCTGAGCC	34	1.30769
CATATTCAAGTTGTTGAGGA	34	1.30769
ACGTATCCCCTCGTGCAATG	34	1.30769
TTCGATCCGTAAAACTTTGA	34	1.30769
AGATAGGTCTTATGATAATC	34	1.30769
AGGGATCAATTAGATATATC	34	1.30769
AACAACACAATCTGAGGTAA	34	1.30769
TTCAAGAACAACACAATCTG	34	1.30769
TCTGGCTTTCTGATTGGTCA	34	1.30769
ATCTGGCTTTCTGATTGGTC	34	1.30769
ATTTGTTCCCCGAATAACGG	34	1.30769
CTGTCCTAACTCTCTTATAT	34	1.30769
AGAGCCCATATAAGAGAGTT	34	1.30769
AAGACCCATGTCTTAATGAT	34	1.30769
GTACCTGGCATGGCTTGCTA	34	1.30769
GGATCGTCTGTTTCGACCAG	34	1.30769
ATTTTGAGTTGTTTGTGGAA	34	1.30769
TACCGTATCAACAGATGATC	34	1.30769
TGGTTGTTACAGCGAAGTTC	34	1.30769
TGATTACAACAGATGGACTT	34	1.30769
GTCTTTGTAAGGGATCAAGT	34	1.30769
ATTCCCCAAGGACGGGAGAC	34	1.30769
GTGTGAATCGGTGTGAATGG	34	1.30769
TGTGCAGGTGAGAGATAACC	34	1.30769
GATGCACCAACAACAATATC	34	1.30769
AGCATCACAATACACAACAA	34	1.30769
GGTTGAAAGACAAGTGGGGG	34	1.30769
GCGTTTTGTTGGCAAGGTTG	34	1.30769
CACGATAGTCTACGCACATG	34	1.30769
AAACAAAGTCTTGCTGTGAA	34	1.30769
CCATAGTTCGCACGTCAACT	34	1.30769
TAGAGATATCCTATCACCCA	34	1.30769
TTTGATCATTCCTAGAGGTA	34	1.30769
TGTATGTTGCTGTATGCTGG	34	1.30769
AAGTGTATCAAGTTCGAGAA	34	1.30769
TCTTCCATCAAATACATATG	34	1.30769
GGAAGGGGCAAGCATTTGTT	34	1.30769
TCAAAAATCAGATCATCTGT	34	1.30769
TCAAGCCATAAGAATGGAAC	34	1.30769
CTCATTCAAACACACTTGAC	34	1.30769
ATCCAACTTCAGTATCACAA	34	1.30769
TATTTTGGATGCAATTAGAG	34	1.30769
GTAACTCTTTTGTCTACTCT	34	1.30769
GTGAAAAAAGGAAGAAATCG	34	1.30769
AGTGATTTGTCAGATTAATG	34	1.30769
AAGCTCAGAAGAAATAGCCA	34	1.30769
TTGATGTCAGAACATCCTGT	34	1.30769
CTGAGCTTGGGCCCTTGCTT	34	1.30769
TCTGAGCTTGGGCCCTTGCT	34	1.30769
GTCTCAGGTAAAATTTCTGA	34	1.30769
GACATTTAGCTGCAGATTGT	34	1.30769
CCTTCAATCCAATTAGGTAA	34	1.30769
TCAATCCAATTAGGTAAGGG	34	1.30769
CCCTTACCTAATTGGATTGA	34	1.30769
CAATCCAATTAGGTAAGGGT	34	1.30769
TAAGATGTGTGGGTACGAAT	34	1.30769
AAATTGTGGTTTAAGATGTG	34	1.30769
GAGTAGCAGAGGGAAAATTT	34	1.30769
ACAAACGATCAACATACAAC	34	1.30769
CTAACTTAATCTCTTTGCCT	34	1.30769
CCACGTTTGCCTTACCCGAA	34	1.30769
CCATTCGGGTAAGGCAAACG	34	1.30769
GGGCATATGCAGTCATTTTC	34	1.30769
CCGTCAAACAGAAGTTGAGA	34	1.30769
ATGTAAGAAGCAAGCGTGTG	34	1.30769
ATCCATGTTTGTCAATATCA	34	1.30769
ACTTGGACAGTTGAAGATCT	34	1.30769
TCAATTCAACAACAGACATA	34	1.30769
CGAGAAGGAGGTCAAGATAG	34	1.30769
TGCATCAGCGTTTGGTCATC	34	1.30769
AATCCAAACAAATGTACGTT	34	1.30769
TTCAAGGTGAGGTTCTTTAG	34	1.30769
GATATTTTGAGCACATGAGA	34	1.30769
AATTCTCCACGAATTGGCCA	34	1.30769
GATTCTCCTTCTTGACAACA	34	1.30769
GTTTGTCAAAGTGTGAATTA	34	1.30769
CCCTTCAGGGGCCTTGAATG	34	1.30769
ACAGCTAAAATTGTATGAAG	34	1.30769
CGTTGGTAGTACAGATAGGA	34	1.30769
TCGTGCCAACCGAAGGAGGA	34	1.30769
ACAGAGAAAGCACTGAGAAT	34	1.30769
GGATAAGCCTCAAAGCAGAT	34	1.30769
AGAAAAGAGGAGAAATAGAG	34	1.30769
TTTCTTGCTTATATATGGCA	34	1.30769
GGTGATGGATAGGGCCGAAT	34	1.30769
AGGTGATGGATAGGGCCGAA	34	1.30769
AAGAAGAAGTGTTTCAAATG	34	1.30769
TTTATTGTACCAGTGGCTTA	34	1.30769
GAACTACTCCAGAAAATTGA	34	1.30769
CCATTTTCCTCTGGAGTCTG	34	1.30769
AGACCAATTGTATCACCTTG	34	1.30769
ACATAGCCAGTACCTTGGGG	34	1.30769
TGAATGTGTTGACAACCCCT	34	1.30769
GGGGTTGTCAACACATTCAA	34	1.30769
GGGCATGTGATCTCAAGAGG	34	1.30769
TATTTCAGGTGATGGTATTG	34	1.30769
ACAGGGTCCGTGAGATATAA	34	1.30769
AGATCAACCTTTATATCTCA	34	1.30769
GCAAGTCAAGAGAAAAACAA	34	1.30769
GAATTAAGGCGCGAACGCCA	34	1.30769
TATCAGATTCTAGAAAGGAT	34	1.30769
AGACTCAAGTCGACTCGGTA	34	1.30769
TACCTGCTTAACCTACTGTT	34	1.30769
GGGGGTAGATACCATGAACT	34	1.30769
TGGTCCAGTATACCCAGCAT	34	1.30769
TAATCCACCAAACTTCTAAC	34	1.30769
ACAAATTCACATCATGCACT	34	1.30769
TTTCGCCTTTCGAACATTCA	34	1.30769
GTGTGTATGGTTTTTGAAGT	34	1.30769
TAAATTGACATATGGATGAG	34	1.30769
CTAAATTGACATATGGATGA	34	1.30769
GAGGAAGAAAACCTTTTAAG	34	1.30769
TCCCTTAACATCCAAGGTTA	34	1.30769
ACTGAAGTCCTAATCATCAC	34	1.30769
TGCTAGGAGAATCAGGTAAG	34	1.30769
TTTTTAGCTGAAATCGACTT	34	1.30769
CATGCTCATCATAATACCTT	34	1.30769
GGACCTGTTGGGATTGGTTT	34	1.30769
GCTTTTATCTAGACAAACGT	34	1.30769
TTTCGTCTCTCAAATATCAG	34	1.30769
TTTGAGACTGTTTGACTGTT	34	1.30769
ATGGTCTAAAGGCTTAAGAG	34	1.30769
CATGGTCTAAAGGCTTAAGA	34	1.30769
AAAACTTAGAATGTGAGGTT	34	1.30769
GTGCCTTTAATGGGCACAAA	34	1.30769
GCAATTCTCAGTTCCATGAT	34	1.30769
AGATGGGATCCAGATGATGG	34	1.30769
GAATGATTCGTGAGTTAGAG	34	1.30769
ATCGACACGGTTCATCTCGC	34	1.30769
TACGGCAAAAATCAGAATTT	34	1.30769
GGATCGAAAAAAGGACGAAA	34	1.30769
AATTCTCTTTCCAAAAGCGG	34	1.30769
ATAGTGCATCACCCAGCCTG	34	1.30769
GTCGAAGAGCCATTACCCTA	34	1.30769
TAAGATGGTTCCATAAGACA	34	1.30769
CTCAGACTGTTGCTGTTTTG	34	1.30769
AAGTCAAACGCCATATGGTA	34	1.30769
GGCTTGATGCCTTAAGTTGG	34	1.30769
AGGTGCAAATAGATCAAGTG	34	1.30769
GGGAGGGATTCAGAGTGAAA	34	1.30769
GATCCCATACCTCAACCAAT	34	1.30769
AAGGTCTTGTTCATTTTCAA	34	1.30769
AGGTTCTAGATGAGTTTTAA	34	1.30769
TTAGCTTTTGGTTCTAAAAG	34	1.30769
AAAAGCTAAACTTGATCCAC	34	1.30769
AGGGGTATAGTCAGCAAGAA	34	1.30769
TCCAAACCTCGAGGATGTTC	34	1.30769
TCCTGAACATCCTCGAGGTT	34	1.30769
GTGCAGACGGCTGTAGCAGC	34	1.30769
TGGTAGTCTGTCTGAAATTC	34	1.30769
TGGGTGGAAATTCTGGATCT	34	1.30769
AGTCAGTCAATAGATAAAAG	34	1.30769
AGAAAGGGGGGGTTGAATAA	34	1.30769
ACACCTCATACATGATATAT	34	1.30769
TCATGTCATGTAAAGCATAT	34	1.30769
GATGAGCTGTTACCCGACGA	34	1.30769
CAGCTGCATGGCTCTCAAGG	34	1.30769
AATCCATCCCACCTTAGCTT	34	1.30769
AGGAGATTGAAAGAATCTTC	34	1.30769
CAACACTTTTTTGACGGTGA	34	1.30769
CGTCACCGTCAAAAAAGTGT	34	1.30769
GGCAATGGAAAAAGGTTACA	34	1.30769
ATCTCAGTTGCTGACTTTGG	34	1.30769
GATTACTTGGGTGATATTCA	34	1.30769
AGATTACTTGGGTGATATTC	34	1.30769
AATTCACTTCCCCAGCCTGT	34	1.30769
GGGACGTTACTCAATATAAA	34	1.30769
TTGTAAGCTATCCAAACATC	34	1.30769
AACATCTTCTTGATGGCGGT	34	1.30769
AGTCGGCTGAGTTTGGCAAG	34	1.30769
GGTCTGGTGGAATCTAAAGA	34	1.30769
GGGAGCAAATGGAGTAAGAT	34	1.30769
ATTGATTCCAGGGGAGCAAA	34	1.30769
TTGGTCAATATTGGTGAGTG	34	1.30769
TGGGAAATCCTCACCATCCA	34	1.30769
AAGAGAAGTTCCTCCCTTAG	34	1.30769
AAGGCCTCCTTGATATTCTT	34	1.30769
GCTACTCCATATGGACTTGA	34	1.30769
GAAGTATGCTAGATGACTTT	34	1.30769
TGAGATACGCAGTTTTTCTT	34	1.30769
GGAAAAGAGGGTAGTATTGG	34	1.30769
ATCTTCTTTTTCTTCTTCAG	34	1.30769
CCCATAATGGAATTCACAAT	34	1.30769
CTATTGTGAATTCCATTATG	34	1.30769
CCTATTGTGAATTCCATTAT	34	1.30769
TCATGATCAAAAGGTGATGT	34	1.30769
GCCATAGAAGTAACAGGGAC	34	1.30769
GGCGCAACAGGTACAGTTCG	34	1.30769
CTTCTCTCTGGTTTATGGTA	34	1.30769
GGAAGGCTCTATTTATAGAG	34	1.30769
CATCTCTTGCTCAACCTACC	34	1.30769
GTACCAACGCAAGGTTGCGC	34	1.30769
GATTCTTTCCTGCTGGCGTC	34	1.30769
TGGCTATTGGATGCACCAAG	34	1.30769
GGAATTGCTTCTGTAAAGTT	34	1.30769
ATGTGTGGGTAAGCGTGAAG	34	1.30769
GCTTACCCACACATCTGAGT	34	1.30769
CGCTACTTTGGCATCCAGAT	34	1.30769
TCTTTAGCGAGATAGCATGT	34	1.30769
TGGAGGCTATTCAAGTGGCT	34	1.30769
ATGGAGTTTTAGTTTGTCTT	34	1.30769
GGAGTTTTAGTTTGTCTTAG	34	1.30769
GAGTTTTAGTTTGTCTTAGG	34	1.30769
TCAGCTTTTGGTAAGCCATT	34	1.30769
TGAGTGTTACGACTCAACTG	34	1.30769
GGTTAACAGTGCTTGGAAAT	34	1.30769
ATGCTCATCCCTTTTACGGT	34	1.30769
AGCATGAGATTGGACGTAAA	34	1.30769
GACTCTCTGGGGAAGTCCGA	34	1.30769
TAATATGACATATCAGGTGA	34	1.30769
ATCATATTCTGCAGGGAGAA	34	1.30769
AGAACAACCCTACTCTGCGG	34	1.30769
TAACTGTTCTGCGGACCGGC	34	1.30769
CAAATAAAGATCAACCACAA	34	1.30769
ATAAAAAATTTCGTGGCTGC	34	1.30769
TACGTGGGCTGTTTTTCAGA	34	1.30769
AGTGGTTTTGAGGCTGTTTT	34	1.30769
TCTTACCCCCCGTGATGTAG	34	1.30769
AGCATAGGTTGTTCCACCCA	34	1.30769
CATATCACATGTTTACAGCG	34	1.30769
GTCTACTGTAGGAAAAACTC	34	1.30769
GAGATTTGAGTCCTTTAAAT	34	1.30769
GGTGTTGATGCAGAATGGTC	34	1.30769
CAAGCATACACTTTTGGTTT	34	1.30769
TGATGGGAGTGAGCATACAA	34	1.30769
GTGGAGGCCAAGTTGCAGTC	34	1.30769
TTGTTGTGAGTGTGTATGTT	34	1.30769
TTTGTTGTGAGTGTGTATGT	34	1.30769
TGACGTGGGAACTGGAGAGC	34	1.30769
TAATCCGGGAGAATCTTTTG	34	1.30769
GACACCGCAGAGTGTTAAGT	34	1.30769
ACCGTTGTTGACTCAATATT	34	1.30769
TTTTGTTGACAAGATTGTTC	34	1.30769
CTTAAGTAAGTGAAGATTTG	34	1.30769
ATCCAAAAAAAAGAGGACTT	34	1.30769
TTCAGGTTTGATGCAACCAT	34	1.30769
TCACGTAACAGTAGATCATT	34	1.30769
CAAGAGGATACTCCTGAGTT	34	1.30769
TCTTTCCATAACTTCACACG	34	1.30769
GTTTATCTTTCCGTCACAAC	34	1.30769
AAAAAAACGGGGCATTCCTT	34	1.30769
ATTTTTACATCACTTCACGT	34	1.30769
GGGGCTGACCCAGTTACTAT	34	1.30769
TCGTCTTCCAAAATGGGTGG	34	1.30769
CTCTATGATCTTCTTCTTAT	34	1.30769
GGAACAATCTGGTATGGATT	34	1.30769
GCCCACATCAGAAGTTCTGA	34	1.30769
CCACATCAGAAGTTCTGAAG	34	1.30769
ATGTGAAAAGTGAAGGATTT	34	1.30769
TAACATTCGCCATATAAACA	34	1.30769
AGCCAATCACAGACAAGTTC	34	1.30769
GTTCACCCAATTTCTTGAAA	34	1.30769
TATAGGCCTTTTCAAGAAAT	34	1.30769
TTTTGGCATTTGGTCAAAGA	34	1.30769
ATTTTGAGGTTTTTGGCATT	34	1.30769
ATTAGGGTTAGGTTATTTTG	34	1.30769
CCCTCAGAAGTGAAGTGGGC	34	1.30769
TGTGCTCATTTATCCGATTG	34	1.30769
AAGATGGTCTGATAGGTTGA	34	1.30769
GGTTTGTGATGTTATGGGAG	34	1.30769
GGTTGGATTGGTAGTGGTGG	34	1.30769
GAAGGAAGGTTTGGAGAGAA	34	1.30769
TTTTTGTAACGTAGCATGGA	34	1.30769
CGCAACTCGGCTGGGGAAAT	34	1.30769
TGCATGAACACCTACTGAGG	34	1.30769
AGAAAACCCCCTAAAACCCT	34	1.30769
GGGAAGTTGGAATACGCGTT	34	1.30769
ACTGTTGGGGATTAACCTTC	34	1.30769
GTTTGCAGGTCTACGAGGCT	34	1.30769
TGATGATTCTTTGGCTGTTT	34	1.30769
CATCACAGAAAACAGAATGC	34	1.30769
TGTGAATGGAAAGGTTTGGA	34	1.30769
TGCGCAACGGAAGGGTGATG	34	1.30769
ATATGGACAAAAGGATCTTG	34	1.30769
TAGAAATGAATTTTGGAGGC	34	1.30769
ACGTTGTGACGGACGGGGCA	34	1.30769
GTTTATGCCCAAAGAGGTGG	34	1.30769
CAGGCGCAAAAAGTTCGGTA	34	1.30769
TGATTCAGGTAAATTTTCGA	34	1.30769
TAGTTTCGTATGTAGGATTT	34	1.30769
GTGGTGATCATAGAACATTA	34	1.30769
GTTGAACATAAGGAAATTTC	34	1.30769
AATTTTACCCTCATAAGGAT	34	1.30769
GCCTAAGTCAGCTGCCTTTT	34	1.30769
TCAATATTGCAAAAGGATGA	34	1.30769
AATCAGGTTCTACAGAAATG	34	1.30769
ATCAGGTTCTACAGAAATGT	34	1.30769
GGCATCAAGCCCCCAAATCA	34	1.30769
AGGAAATACCAGAATACCAC	34	1.30769
GATGACTTGACGAGGGCCAA	34	1.30769
CTCTGATACGTAACACTTAG	34	1.30769
AAAAATAAGCTGAACGAGCA	34	1.30769
TGTTAACCGGTTAATAGCAT	34	1.30769
TAAGTAGAATGCGAATCTGT	34	1.30769
AGGCTGGATTTAGAGATACC	34	1.30769
CAGGTGAAGGATAACCATCG	34	1.30769
ATTGTAGAATTACCAGCGAT	34	1.30769
CAGAAGAAGCTGACGACTGG	34	1.30769
TCTGAAGAGGAAGCCTCTGA	34	1.30769
CAACCAATGCCTAATTTCTT	34	1.30769
GTAGAGGTAAGCGTCCAAGG	34	1.30769
TGAACTGGAAAGGGGTTTCC	34	1.30769
TTCTTCCCTTTTTGTTTTGT	34	1.30769
CACTTGGTAAAGGCATACAC	34	1.30769
GGTAAAGGCATACACTGGTA	34	1.30769
GTAAAGGCATACACTGGTAG	34	1.30769
AACAACCAAGGTTGGCCCAA	34	1.30769
TTCTAAAGTTGTGTACGATT	34	1.30769
AGGAGTGCATTGGTTGATAT	34	1.30769
GCTGGTATGCCCGAATATTA	34	1.30769
TCAATGTCAGAAGCCGAGAA	34	1.30769
TTTGTACTTTCCTTGCTACT	34	1.30769
TCGTGCTGAGTGTGTATGTG	34	1.30769
CTTCGAATCACAAGGTAAGG	34	1.30769
ATACTACAACATTGTCCATG	34	1.30769
CACGTTTTTCACATTTAAGT	34	1.30769
CTGCCCTAGGTTAAAAGATG	34	1.30769
GGCCAAAGATGAGTCAACTA	34	1.30769
AAGCATCTCGTTGTAATCCC	34	1.30769
GTAGAAGAATTGGAACTGCA	34	1.30769
AAAGACGAAAACGCACAAAA	34	1.30769
GCGATTTTACCAGTAAGTGC	34	1.30769
TGGGATAGGATCTAGAAGGG	34	1.30769
AAGGTAGTGGGTTCGAAACC	34	1.30769
GGTCCTACGAAGATATGCCT	34	1.30769
AGTGGATGAAGCCACCACTC	34	1.30769
TATAACAACTGGTAGAAGCT	34	1.30769
CACAATATTGTCTCCCCCAG	34	1.30769
CGCGTTCTCGCTGAGCGAAG	34	1.30769
TACCCGCACTATGATGGAGA	34	1.30769
CACCTTCTCCATCATAGTGC	34	1.30769
TACCCTTCCTCCTATCTATT	34	1.30769
TTCTCAAACTGAGCGACCGT	34	1.30769
ATATGTTGTATGGAATGTGT	34	1.30769
TCACCTGCATATCATCTACT	34	1.30769
GTTGTGGTGTATACAAAAAA	34	1.30769
GATCACCAGAGCTTATCAGT	34	1.30769
GCGCACGTTTTGGATTAATC	34	1.30769
GCAAGGGAGAGAAAATTTCT	34	1.30769
GAGATAAAGAAAACTCTGCT	34	1.30769
TGCATGATGTACTCTCTGTA	34	1.30769
TCCAGTTGGCACTTGTGACC	34	1.30769
GCAGAAGTGAGAAGAAGAAG	34	1.30769
GACCACAACAGGAGTAACCA	34	1.30769
TTGTTTCCGCTTCTATTAGT	34	1.30769
ACATTCTAAACTCGGAGCGC	34	1.30769
TGCTTGTTAACAAATGTGAA	34	1.30769
TTCAGCTTAAAACCTTTTCA	34	1.30769
TGCTTCTTTTTTGATGGCTT	34	1.30769
GGCTTTAATGTTGAAATTAG	34	1.30769
CAGAATCACAGATATGTTGG	34	1.30769
TCCCAGGGAAGCTGAAATCT	34	1.30769
TAAAAGATACCAGACTCTAC	34	1.30769
GTTGTCTGCGACTCAGGCTG	34	1.30769
GAGGCCTCTGAATAGCTGCC	34	1.30769
AATTCTCAACCAAAGCAGAA	34	1.30769
GGACGTCACACATCCCTGCA	34	1.30769
GGGCAAGTATGATCCTGATG	34	1.30769
ATAGGTCTTAAGGTGAATTT	34	1.30769
TCTCTTGTTGGGGGATCAGC	34	1.30769
ATGGGCTAAGGATGATTGAA	34	1.30769
GGTCACTTATAGGCAAAATG	34	1.30769
GCACTTTGAATAAGATGATA	34	1.30769
AGCTTTGTGAGTGTGTGTTA	34	1.30769
CATGATCATGGGAAGCTGTT	34	1.30769
GATGTGAGATGATGGCTGAT	34	1.30769
AGATGTGAGATGATGGCTGA	34	1.30769
TAACTGTTGCTGAAGGAGGT	34	1.30769
CATATCAACCTCAGAATTAC	34	1.30769
GTGGGGTGCACCGATACTGT	34	1.30769
TTGTTGATGTGTTGGCATGA	34	1.30769
AAAAACCATTTTCATACCTC	34	1.30769
TGAAAGGCGGGCAATTTATC	34	1.30769
ACGTGTGGGATCTAGTTCCT	34	1.30769
ACACGCGCCAATGCGCTTCC	34	1.30769
GGATGAACTGAGGTGTTTTA	34	1.30769
GTGGGGAATTTTTCCCACGC	34	1.30769
GATTCTGACTGCTGGACTGA	34	1.30769
ACAGAAGCAATCCCTAAATG	34	1.30769
AACCCCTCTTTTCATTTTGC	34	1.30769
TCCACTCATTTCACCATTAT	34	1.30769
CAAAAATAAAAGAGAAGTGG	34	1.30769
TTTTGGCAAAAAGTCAAACT	34	1.30769
ATGGCTTGAAATTTGAAGTT	34	1.30769
AGAAAGTGTGAAGGAAAAGC	34	1.30769
TGCGCATTTTTGGATTAGTC	34	1.30769
TTGGCATTAGGGGTTAATGG	34	1.30769
AGTTTGGCATTAGGGGTTAA	34	1.30769
CCTTTCCAACTTCCACATAC	34	1.30769
ATGGGATCTCAACTTCGACG	34	1.30769
TGTACTAAGCTGCCCCAGCT	34	1.30769
GATCGTTAATCTCGGCCCAG	34	1.30769
GTTTTGTTCCCGAATTTGGA	34	1.30769
ATTCGAACTGGCGCATGAAG	34	1.30769
GGAGAACCCTCCGGTGTTCA	34	1.30769
ATGCTCAGTTTGGTCTTGAA	34	1.30769
AGCATCGCTCTCATGGTCCA	34	1.30769
GAAGAATTTGGAAGAATTGC	34	1.30769
TTTGAACAAGGTAACTTTGG	34	1.30769
TTACTAGCAGTTATAATCGA	34	1.30769
ATGCCATTATCTCAAGTCTT	34	1.30769
TGAGACACATGGTTTCATCT	34	1.30769
AAATAACGAACGCACGACTA	34	1.30769
GATGGGAATATCAAGGAGAT	34	1.30769
GGCTTTAGGATGAGTGGTGA	34	1.30769
TTCAGCAGGTCAATACTTGC	34	1.30769
GGACTAGGTTAAGGTGGTGG	34	1.30769
CAGAAAACACCTGGATCCTC	34	1.30769
AATTTTTAGGGGTTTGTGAA	34	1.30769
TAACCGCTTGATTCTGATAC	34	1.30769
GGCTTCTAGTGTTGTATTTG	34	1.30769
GCTTCTAGTGTTGTATTTGT	34	1.30769
AACATCATCTGGAGGAAGGT	34	1.30769
TTTCTATCAAATCCTGCTTT	34	1.30769
TTCATCCCAATAGTAGCTTC	34	1.30769
GAGTTGTGTGTATGATGCTA	34	1.30769
TTTAACATCGCATGGCTCGA	34	1.30769
CTGAGAGCATAAGCGATCTG	34	1.30769
AAAGAAAAGATACTCTACTG	34	1.30769
CTGAAGGTAGGAACGGGTCT	34	1.30769
CAAAGTAGGGGCATCTCTAG	34	1.30769
ATGCATTGGTGATGAGCAGA	34	1.30769
CAATCCACCATTGTTCAAAG	34	1.30769
ACCATTTTCAAGACTCATGC	34	1.30769
ATGGGTGGTACGCGTATGGA	34	1.30769
TTCAAGAATCATTCAAAGCT	34	1.30769
ATTCTGTAGACTTAAAAGCC	34	1.30769
GACAATGATCTTTTAATCGA	34	1.30769
CGCGGCGCGAACTGATGAAC	34	1.30769
ATTTGAAAGAGGAGATCAAG	34	1.30769
GAGCAGTCCAGGAAAAAATT	34	1.30769
GTCTGGTCGTGGCGGTGCAC	34	1.30769
TACCGTTTTCTTTAAGATGG	34	1.30769
TATCAGATTTCGGAGAGGAT	34	1.30769
AGAGGAAATCGTCAAGAAGA	34	1.30769
GAACAATAGCTGCTTTAGTA	34	1.30769
GGGCGCTCTACGGAGGCTAT	34	1.30769
TGCATCTCGGAAGGAAGCAA	34	1.30769
TGAATATCATCAATGTACAG	34	1.30769
GGTAACTCGAAGTGCAAGAA	34	1.30769
CAATTCTCTTCTTCAAGGTA	34	1.30769
GTCAACAGAACCAACAGAAG	34	1.30769
ATCATAAAAAGGCCCTTGTA	34	1.30769
TGGTTATAACAACTCGAAGT	34	1.30769
TTTTTCTTCTTCTTCTGAGG	34	1.30769
AACCCCTAGAACATACCTTG	34	1.30769
AAAACGCAAATGGGGGCGCT	34	1.30769
TCCCGTCTACCAAGCTGAAG	34	1.30769
AAAAGTTGTGAATATGGCAT	34	1.30769
CAACTTTTTAGAACCTTGTC	34	1.30769
AGAATAAGTACCCTTTGCCG	34	1.30769
TTTCAACCATATCAAAGTGT	34	1.30769
GACCATGCCGTTACAATTCT	34	1.30769
GGTCAAAAGTGATGAAAATG	34	1.30769
ATCCCATTTCCACTCTGGAA	34	1.30769
CGGCTCATCTGCAGTGAGGG	34	1.30769
ATACGGCTCATCTGCAGTGA	34	1.30769
AGGAACAACTGACTCCACTG	34	1.30769
AAAGGAACAACTGACTCCAC	34	1.30769
GATGCTCTATCTTCGACTTC	34	1.30769
TGATGTTTGAGGTCAAGAAG	34	1.30769
TAAGGAGATTTCTTTGGTAA	34	1.30769
TCTTTGGTAAAGGTTGTTTG	34	1.30769
TCTGTTGATTCATTGCTTTC	34	1.30769
TCTTTACCCACTTTCCTTCT	34	1.30769
ACTAGAACCCTAGTCTCTTA	34	1.30769
GCGCATATCAATATCTGGAG	34	1.30769
GAGCCAAATATGTGTTATAC	34	1.30769
TGTGGTTTAGGATCAAGATT	34	1.30769
GTGGTTTAGGATCAAGATTT	34	1.30769
TTCTGGGCTCTGGCATCTCT	34	1.30769
AGTTTACATTACCCCCATCT	34	1.30769
TCATAGTTCCTTCGATTAAA	34	1.30769
GTTACTTCAGATCGAGTCTT	34	1.30769
CCAAACGCTTCTCATCGATG	34	1.30769
CCTCATCGATGAGAAGCGTT	34	1.30769
TCTTAAGTTAATCACCAAAG	34	1.30769
ACTTGGTCATATGAGACAAA	34	1.30769
AAAAGGAGGGTGCAAGCCTA	34	1.30769
CATCTCTGTTAGGTGCAACG	34	1.30769
GGCATTCAAAGTTGTCATAG	34	1.30769
GAGATCATACCATTAACTCA	34	1.30769
GTTCGCGGCGCGAAACAAGG	34	1.30769
TTGCCCCTGGGATCGCCCTG	34	1.30769
GCAGGTCGGTCCATCCGACC	34	1.30769
CAGTGCAAAAACCTTTCTGT	34	1.30769
ATACCGCATTTACTTGTGAC	34	1.30769
TTACCACTATAATACTGACA	34	1.30769
CCATTGTTGTTGTTGTTGCG	34	1.30769
CCTCGCAACAACAACAACAA	34	1.30769
TTTAGTAGGATCTGATGATG	34	1.30769
GTAGATTCATTTTATTCCCT	34	1.30769
GAATCTGAGGGTGAGACCAA	34	1.30769
CTATGCTGGGGAAAACTAAC	34	1.30769
GTACCAACGTAGAGCTGCAC	34	1.30769
GCACTCGGCACACTGACAGC	34	1.30769
AGGCACAGATAGAATCTGGT	34	1.30769
GTGCCTCTTCTGGGTACGAA	34	1.30769
AATTGATAAGTTTCTCGCTG	34	1.30769
CCCACTTGGGGCATCCAAGA	34	1.30769
AATAACATTATCTGTCGGTA	34	1.30769
CGGGAGAATTCAGAATCTAT	34	1.30769
ATGGAAAGTGATACTTCCCA	34	1.30769
CTTTGCTGTTTCGACGATGC	34	1.30769
ACTCAAAGTGATGCTTGGCC	34	1.30769
TTAGAATCTCAAGGTTTGGG	34	1.30769
AATTTTTCCCAGTTGCGCGC	34	1.30769
AAGAAACAACTTTGGAAAGC	34	1.30769
ACCAACATTTTTTAGACCAA	34	1.30769
ATCTCTCTGAGGACTCCGCC	34	1.30769
CCTTTCTTATCCCTTTTTGT	34	1.30769
TTTGGTACTATGGAAAAGGA	34	1.30769
TCAGACATTTCATGGTATAA	34	1.30769
GGTATGGTGAGTTGAATGAA	34	1.30769
TTATGTTTGAGGTGAGTTTT	34	1.30769
GAGAGGAATAACTCTGTTGG	34	1.30769
GACAAGATTGTTAAGACAAG	34	1.30769
GCCTGTTTGGCAGATTTGGT	34	1.30769
ATTCGTAAATCGATAAGGTA	34	1.30769
TTCGTAAATCGATAAGGTAA	34	1.30769
TCGTAAATCGATAAGGTAAG	34	1.30769
AATGAGATGCATGATGTGCA	34	1.30769
CTTGCAGAATTTATTCAAGT	34	1.30769
CTTTACTTTCCCGTCACAAC	34	1.30769
AGGGTCGTCTGGTACGACAA	34	1.30769
GGAGCTGGTGTATGGTATTG	34	1.30769
CTTAAGGGTGGTTTGGCTCA	34	1.30769
AATCATCATTGCTTTGCATT	34	1.30769
ATCATCATTGCTTTGCATTT	34	1.30769
AAACCCTATGTTCCTATTTT	34	1.30769
TATTCGTTGTTTTTATCCCC	34	1.30769
TCTGCTTGCTCATCATCTGT	34	1.30769
TGTTATTGACGAGGAACATT	34	1.30769
ATAAGCATGGATTTTGTGTC	34	1.30769
GCGCCGCGAATCGCTGTTTT	34	1.30769
AGGAGAACTTGTGAAAGACG	34	1.30769
TTATTACCGCAGGTTTATTG	34	1.30769
AAAATCCCTCAATAAACCTG	34	1.30769
GAAGGAAGTTGATGTTCTAG	34	1.30769
TCAAGGCTTACGCGCAGAGA	34	1.30769
TGAGATGGCCTGTAGAGGGG	34	1.30769
GGTCAAAGAAGGAGTTGTAT	34	1.30769
CTGCGGAAATTGGGCTTGCA	34	1.30769
TACCTTTCTGGGTAAATTCA	34	1.30769
AATTTTATGGAGGATGCTAA	34	1.30769
TTCGCATTTTCGAATAACTC	34	1.30769
TTGCACCTCCCTTCTTGCTT	34	1.30769
AGGGAGACCATGTGTTTCTT	34	1.30769
CGTCGACCGGCTGGTGAGCA	34	1.30769
CTTTCCTCTTTTTGGATTTT	34	1.30769
GACCTCAAAACACAAACCAA	34	1.30769
GCTTGGAAGGCTGTGATAAA	34	1.30769
GGAAGGCTGTGATAAAAGGA	34	1.30769
GTTTTGTCTTCAGTTCTGGT	34	1.30769
ACTACAACATTTGCCTTACC	34	1.30769
GATACCACTTCTACCTTCGA	34	1.30769
CTGAAAGCTCTTGTACGAAG	34	1.30769
AGATTTATCATGATAAGAGG	34	1.30769
TGAGCTAACTTAAGAGTTAC	34	1.30769
AGTCACTCGGCGTTGGACCA	34	1.30769
ACAACTCTGATGCAGACATT	34	1.30769
TCATCACCATCATCACTATC	34	1.30769
GAATATGATGGTTCGTATGT	34	1.30769
AATGTTTATGATGGCCTTTA	34	1.30769
GTAGGAAATTCTGCAGTGGC	34	1.30769
TGCGTCTTGTACGCTCTGGA	34	1.30769
GCGTCTTGTACGCTCTGGAT	34	1.30769
ACCTCATCCAGAGACAGACT	34	1.30769
GTCAATTCTAAATCATGAGT	34	1.30769
AGGGGGGTGCACTGAGGCTG	34	1.30769
TTTTGCCTCATATGTTCGAT	34	1.30769
ACAGGCTGATAAGAAAGTGG	34	1.30769
ACAGTGCGAGCTAAGAAATG	34	1.30769
AGTGCGAGCTAAGAAATGCG	34	1.30769
GTGCGAGCTAAGAAATGCGG	34	1.30769
AAGATGAAAAACGAACGGTT	34	1.30769
GTTCAAGTGACTTGTTTAGG	34	1.30769
TGAGATGGTGCGACTTCATT	34	1.30769
TGGTCCTATCAAGATATGTC	34	1.30769
GGCTATGGATAGGTAATGGA	34	1.30769
GATTCACAACATCTAAATCA	34	1.30769
GTGAGGAACTGATTTCTAGC	34	1.30769
ATGTGGCTTCATTTTAAGCA	34	1.30769
CAAAGGGTGAACATGTGAAT	34	1.30769
GTTTGACATCTTTTCCTTCA	34	1.30769
TCTTGTGCTCAATAGTTTTT	34	1.30769
TCTCGATACGCAATCAAATT	34	1.30769
TGCGCGAACTGAAGCGTAAT	34	1.30769
ATTACAAGGCTTCGGAATGG	34	1.30769
GGATACTCTGAACGATCTAA	34	1.30769
TTTGACGTGAATGTTGAAAT	34	1.30769
TTACTCGAGAGAGAGATATA	34	1.30769
CAAGAGATCGGTATTTGGGG	34	1.30769
AAGGGTATGATCCTATGATG	34	1.30769
TGTTTTGAGTTGATTCGGTA	34	1.30769
TACCAAAGACAGCCCTTATG	34	1.30769
ATATGTGATGTATGTTGCTT	34	1.30769
AGACTTTGCTAGGAACAAGG	34	1.30769
GCAGTGGGAGGATTTTCTCT	34	1.30769
GGCCAGTTCACGCCACCTCT	34	1.30769
TTCTGAAATTAACGTGTTCG	34	1.30769
GGACCTGTTGTGCCTTGGCT	34	1.30769
ATTTATCTTTTCGTCACAAC	34	1.30769
GCTTGAGCATTACTTGGGCC	34	1.30769
CTAAGAGGTTAAATCATCTA	34	1.30769
GGTTTGTTTGGGGATTTTGG	34	1.30769
TAGCCTTAGCAGCCCTTAGT	34	1.30769
CTTAAGGTAGGCTTAGGATT	34	1.30769
GACCTTGGATATCTGTGATC	34	1.30769
GGCACGTTGGAAATGTGCTG	34	1.30769
AGGCACGTTGGAAATGTGCT	34	1.30769
GTCAAAATATAAGTGGAATG	34	1.30769
ATATAAGTGGAATGAGGTTT	34	1.30769
ATCCACACATCTGAGTAATA	34	1.30769
CCTTTCGGATTAAAGAATGT	34	1.30769
ACTTACAAAAGCTGTTTGAG	34	1.30769
GGCATGTGGGGCACATCAAG	34	1.30769
CATAAAAATGGGACTGGAGT	34	1.30769
TTCGACTTTGCTTCGTTGTG	34	1.30769
CGCGTGTGAGGGAGGGGACG	34	1.30769
TGGGGCATTTAGGGCTGTCA	34	1.30769
TATAGGATTCAAAGGTGAGT	34	1.30769
GTCCCACTAATGGGCATGAG	34	1.30769
TCTCTCATACATTTCACGTT	34	1.30769
TTCTGGAAGTTGTCAATTTA	34	1.30769
CATCACGGGAAATAAAAATG	34	1.30769
ATCACGGGAAATAAAAATGC	34	1.30769
GGTGGTATCAGCACATTCGA	34	1.30769
ATGTCCTATAAGGCCAAGAT	34	1.30769
TGTCCTATAAGGCCAAGATG	34	1.30769
ATCCTTTCGTAGCAACTTGC	34	1.30769
ACTAGGCATCTCTTTAGAAC	34	1.30769
TCGGCTGTTTGTTGCAATGT	34	1.30769
AAATGGGCCAAAGCATGGTT	34	1.30769
GAAAAGATCCAAGTTTGGAA	34	1.30769
AACTCTGAACTGTCACTTTT	34	1.30769
GAAGGAGAATCATATGTTTA	34	1.30769
AGTCGTTCAATTCTGATGCA	34	1.30769
GGGTGGGCGTTGGATGTCAT	34	1.30769
GGAATGTTTCTTTCTCTCGT	34	1.30769
GCAGTATCGTCAGATAGCTT	34	1.30769
TCACCTTCTGAAGCCAGCTG	34	1.30769
AAGTCAAGCACACTTAACTA	34	1.30769
TCAAAAGATCCTCAAGCGAC	34	1.30769
CCGGGGAAACAATAAAGCAA	34	1.30769
TGAGGGAGGTGTGACGGGCG	34	1.30769
CCCTACCATCCGCAAACCAG	34	1.30769
CATCCACGTCTTTGAGTTGG	34	1.30769
TGTATTGTTGCATCTGGAAA	34	1.30769
GTTGAGGATAATCTCATTTA	34	1.30769
TGAATAAAAACACAATGGCA	34	1.30769
TCCAATGGTGAAAACCAAAC	34	1.30769
GCCAGTTTGGTTTTCACCAT	34	1.30769
GGAGATTTTGGGCATAGGAT	34	1.30769
TGGAGATTTTGGGCATAGGA	34	1.30769
GGCTTGAGATCCCTTAGTTT	34	1.30769
AACCCATCCGGGGACAATGC	34	1.30769
TTTTGGGTCTGTTGAGTGTT	34	1.30769
TTGGAGAAATAGAGAGAAAA	34	1.30769
CAGAAAAGGGTGTTACAGAA	34	1.30769
CGTTTTAGATATTCCTCAGA	34	1.30769
GAGCTTCGCTGAGCGAAGGT	34	1.30769
TGGTTGTTGAATATTGGAGA	34	1.30769
GCAAACCTGTCGGTTTATCT	34	1.30769
ACACCCCAAAGTGTAAAGTT	34	1.30769
TGTTGAAGTTACTGGAAATG	34	1.30769
TACCCGGTATTTGTATTCAG	34	1.30769
TTCCCTATTTTGAGGGTAGC	34	1.30769
CTGGTATATTCTATCTTTCT	34	1.30769
TGCTCAGATCCAGACTGCAC	34	1.30769
TTCTCGGTTTTTCTCCTTCA	34	1.30769
TCTTAACACAGTTGAATTGA	34	1.30769
GGACCAAACGCCATGAAATA	34	1.30769
GTGATATCTGATCTTTTCTC	34	1.30769
TGCTTTATTTGCATCTTTGC	34	1.30769
TTCAGGTTCCAAGAGGGTGT	34	1.30769
TTTCAACAATGGTCTGATCA	34	1.30769
GACAACTCTGAAGTTAGCAA	34	1.30769
TTGAAGGGTATGAAGAAAGC	34	1.30769
TGTACGCTCATTCATATTCA	34	1.30769
GGATCATGACTTGGTCTTTT	34	1.30769
GGAAAAAGTTGCATATCGAG	34	1.30769
AGCAATCCGTCAGAGATTAG	34	1.30769
TGATGATTTGGATAGGCTAA	34	1.30769
AATGTGCCAACTTTTACTGA	34	1.30769
AGTTGAAATCCCATCAATGA	34	1.30769
TCTTGACCATTGGATCCATT	34	1.30769
TGGCGTGGGATTTTCTTTAG	34	1.30769
TGATCAATGCATGTACAAAC	34	1.30769
CTCTTCCTACACCAGTTACC	34	1.30769
GTACGTCACCTACTGGAATT	34	1.30769
TTGTGACGTACGTCACCTAC	34	1.30769
TGCTGTTTTCTGCATAATGC	34	1.30769
CAAAAACGTCCCTCATGATG	34	1.30769
GTGTGTAGCGCCTGTGAGTG	34	1.30769
GGCTTCTTTTTATCATCTGC	34	1.30769
GTTGTCTAAGAGTGTGTAGA	34	1.30769
GAGTATGGTACGAGTATGAG	34	1.30769
CTCAATGCGTACCTCAACAG	34	1.30769
AAGGCTCATGGAAGGGTTTT	34	1.30769
AACCCTGATCTTGTTTCTAA	34	1.30769
TACTCCCGCAGTCAGATCCA	34	1.30769
GACTGTGTTTCGCGTAAATT	34	1.30769
TGCAGGTATTGGGAAGTTTT	34	1.30769
ACTCTGTTTGAGGTGCCGTT	34	1.30769
GTTGCAGTGTGAAGCGTAGA	34	1.30769
GAATGAAGCAAGCGTTTGAT	34	1.30769
AGAGAATTAGAGGGTGTGAC	34	1.30769
ACATCTCATATACATCCTAT	34	1.30769
TTTGTAGTTTTGGGTTGTTT	34	1.30769
TTGTCCCTTTGGAATCTCTT	34	1.30769
CACTGCTGCTGCGTTGGATT	34	1.30769
CTTGGTTTTTGGTGGAACTT	34	1.30769
AGACCAAGTTTTTGGCTTTT	34	1.30769
GCTGTTACACATGGACCTGA	34	1.30769
CAAGAAGGAGGTTGTCATGA	34	1.30769
TGGAAATTGGTGTCAAGGAA	34	1.30769
CTTCTGTGCGCACTTCAACA	34	1.30769
AGGAATGGTATTTGAATGAT	34	1.30769
AAAGTGATTTTCCCCTAGTT	34	1.30769
AATAATTTGCAGTGGAAATG	34	1.30769
ATGACAGGCTCTTTGAAAAG	34	1.30769
TTAGGTATCCTTGGCATTTG	34	1.30769
GACCATTTCGGACTAAAGTC	34	1.30769
CAGAAGCAACTTTACAACCA	34	1.30769
GCGAAACTGCGATTCTGCTA	34	1.30769
ATAGAGCACCCTTCAATCCA	34	1.30769
AGATAGCAACTTGGATAAAA	34	1.30769
GTGTTATGAAGGAGATATGA	34	1.30769
TCATTGATCCCATCTGGATG	34	1.30769
TTGATTCTAGAACTCATCAT	34	1.30769
CATAGGCAAGAAATATGGAT	34	1.30769
ATGAAGGGATCCATATTCTA	34	1.30769
GATGTGAGATGAAGCGAGAG	34	1.30769
GATTTTTTACACGTGTTAAC	34	1.30769
CTCTCTTTTTATGTAGCGTT	34	1.30769
TTGGTAATTAAGAGAGGTAT	34	1.30769
TAGCAGAAGAGGCTGATGAC	34	1.30769
CTTGCGATACAGCTTATCGG	34	1.30769
TATTGTGCCAGTTCCTAAAA	34	1.30769
ATCAAAGGTCTTCCAGCAAT	34	1.30769
TAGTTCCTTGAGTTGAAGCA	34	1.30769
TTGTGTAGTTCTGTAGGATT	34	1.30769
TTTGTATCTGGAGACTCTGT	34	1.30769
ATGTTGTGCTGGGTATGAAC	34	1.30769
TATGTTGTGACTGTTGTGTA	34	1.30769
TATTGGACGTCGATTGGATT	34	1.30769
TGCAGTTTCGCTCAGCGAAA	34	1.30769
TTAAGGAGTATGCTCAAAAA	34	1.30769
ATGGAGTACCACAAATGTAG	34	1.30769
GTAAAAGGGGTGGTTTACAA	34	1.30769
CAATCCCAGTCTCTCGTCCT	34	1.30769
TTGTCTGGTTGGGAGCTGCT	34	1.30769
CAGGAATTCGCTGCAGACGT	34	1.30769
GATGTGGTGTGGGGGAAGGC	34	1.30769
AATAACAGTAGCATTGCAAA	34	1.30769
AAGATGTAGCAACTGCAGCA	34	1.30769
ATACCGATCACTACTAAAGG	34	1.30769
TTGAGAGTAACCATGACTTG	34	1.30769
ACCGACTCATGAATGAAGGT	34	1.30769
TCCTACCTTCATTCATGAGT	34	1.30769
TTGGGGATTCCAACTGCACT	34	1.30769
TCAGAAGAAAACTCAAGATA	34	1.30769
TCTGGTAAAGAGAGGGGCGT	34	1.30769
ATGGATTCTGAAATAGACAT	34	1.30769
AGAGCCTGCTGATGTCAACA	34	1.30769
TTTTGAATGACTGTCGAAGA	34	1.30769
GCAAATGGAATTAGCGAAAA	34	1.30769
AAAGGTGAGATTGTGATTGA	34	1.30769
GAGATTGTGATTGAGGGCTT	34	1.30769
GAATTTCAGTGCAGTTTTGG	34	1.30769
CAACACCAATTCCTATACTG	34	1.30769
CACAGTATAGGAATTGGTGT	34	1.30769
GAAGCTGTGAAGCAAGGTTA	34	1.30769
GGGGGGATTCTGTAACTCAG	34	1.30769
CTAATGATCACTCAACTTTC	34	1.30769
TGTGTAGCTTGCCTATTTAT	34	1.30769
GGGGATACATAACCAAAAAA	34	1.30769
CTGTTGGGATTTTGAGGATA	34	1.30769
GTATGGATTTTTATGGGTGA	34	1.30769
CAATTCTTCTTTTGGACTTT	34	1.30769
AAAAGGGGGGAATTGGTTTA	34	1.30769
TCCTGATGAGGAAGGAAGTG	34	1.30769
GTTGTTGTGAAAATATGTTG	34	1.30769
GGAGGAAGATCAAGAACCTT	34	1.30769
TGAAGTTTTTGTTGTGTTAG	34	1.30769
GAGTAAGCATTGTTCTTTTG	34	1.30769
AGAAGAGCTTCACAACGAAA	34	1.30769
GGGATAGCAACTGATGTGAC	34	1.30769
TGGGTTCATAGATAGGTATG	34	1.30769
AGCGCGACGAATATCTGTGT	34	1.30769
CGTTGAGATTAGAGGTCGAA	34	1.30769
GCCTACCATCATCTGATTCA	34	1.30769
AGAGATGAAATTCTGAGTTT	34	1.30769
TTGAAATGTGGGGGTGTAAA	34	1.30769
ATGATTGGTGGAAATATAAG	34	1.30769
AAGGATGAAGTTTTCAAGCA	34	1.30769
GAGGATGAAGCTGAATCATC	34	1.30769
CGAAGGAGTGGCTATCAACA	34	1.30769
TGAACATGAACTTGTTCAAA	34	1.30769
ACAAGATCTTTTACTGATCA	34	1.30769
GAGCACTATACGATTTTCCA	34	1.30769
CACCTTCATAGCAAACCTCT	34	1.30769
ATGGGGTAAAGTGAGGCTAG	34	1.30769
CTCAGCAGTGTTTTGTGGAG	34	1.30769
TCTTTTGATTGGTTTTTGGA	34	1.30769
GATGATTTGTAAGGTGAACA	34	1.30769
TTGGTTGAAAATAGGCCTAT	34	1.30769
ATCAGAGGGAGTCGTCCATT	34	1.30769
AGGTACAATGAGACTGTGTG	34	1.30769
CTCAAAGTTTATACCAGTCC	34	1.30769
TACTGAACCATTCACTAAAG	34	1.30769
CAAAGGGATATCCAGGATTA	34	1.30769
TGAGGATGTTCGTGCAAAGA	34	1.30769
TGTTTCAGATGTGGTAAGAC	34	1.30769
TGTTGTAGCTTGAGTTGAGA	34	1.30769
ATCCAAATTTTCACATGTCT	34	1.30769
AACCAAGACATGTGAAAATT	34	1.30769
CACGTTCATTTGTTCCTTTC	34	1.30769
GCGTACTGAGTATAAGAGAA	34	1.30769
GAAGGGTTGTCTTTACTTAT	34	1.30769
GGACATCATTTGGAGTGTGT	34	1.30769
GTGAAAAAGCTGATTTTGAA	34	1.30769
CACTTCATCCAAGTCTCTTC	34	1.30769
AAATTCTTCGAAAGATTGCC	34	1.30769
ATTTTAACACAACATACCTC	34	1.30769
CAGCGGTTCAAGCAGTGGTG	34	1.30769
ATTCTGTAATTGGGTCCTGT	34	1.30769
ATGAGTTAACCGGTTAACGC	34	1.30769
TTTGGGGTGTTGGTGCGAAG	34	1.30769
GAGCATTCCAATAACCACAG	34	1.30769
TTGATGGTGCACAAATGGTT	34	1.30769
TTTCGTTTGTGACAGCTTGC	34	1.30769
ACACGCTGTTTCACAGGACC	34	1.30769
CGGAAAGTGGTCCTTTCTTG	34	1.30769
GTCTGTTCATGATGAGAAAT	34	1.30769
GTTGAATGCAAAAGCACTTC	34	1.30769
CAGACAAAATAAAAACCCAT	34	1.30769
TGGTATATGGATGGTTTGAG	34	1.30769
GTTTTGTCAAGGTGTGCACT	34	1.30769
TAAGCTATCTCCACTGTCTC	34	1.30769
ATGTGGTTTTATGTTGGGAA	34	1.30769
TTGCCATTTTTATGGTTCAA	34	1.30769
TGCCATTTTTATGGTTCAAA	34	1.30769
GGTCATACGCGTATGATACT	34	1.30769
ACATTTCTGGAAGAATTAAG	34	1.30769
CGAAGAAGCTCAGGTCCCAC	34	1.30769
AAACAGATTTAGAAAGCCGG	34	1.30769
TTGCAATACAGCTTATCGGA	34	1.30769
TCTCGTATCTACCAGCACAC	34	1.30769
CACAGTCAAATACATAATCA	34	1.30769
AAACCTCATACAGATCCTTC	34	1.30769
TCACCAGAAGGATCTGTATG	34	1.30769
ATTAGATCTTTCGGTTCCAT	34	1.30769
AGGTTTATGTTCGACTCAAA	34	1.30769
GTATGTCATATGTGAGTGGT	34	1.30769
GACAGTTCAAATAGGTCAAA	34	1.30769
ATTTGGGATATAGTCATTGA	34	1.30769
TGGAGGCCTTTTATAGCTGA	34	1.30769
AATTAGGCTTAGGTTTCAAA	34	1.30769
CTTTGGATGATGATCTGATA	34	1.30769
ACTTTGGATGATGATCTGAT	34	1.30769
TAGAGGTCACTTTGAAATTT	34	1.30769
TTGAAATTTTGGGTGAACTT	34	1.30769
TAGAGGAAAAGGGAGGGCGC	34	1.30769
AGGGTTTTAAACCTCTGGTC	34	1.30769
TTGTGTAGAGGTTTGGTTTG	34	1.30769
TGATGTGTTTAAAGGCTTGA	34	1.30769
AACCTATGGTGACAATAACA	34	1.30769
GAGCGGCTCAACTCCTGTGC	34	1.30769
GATAGAGGATTAGGAGTTGT	34	1.30769
CACTGGATTTGAGAAATACC	34	1.30769
GAGGACGAAACTCTTTTAGT	34	1.30769
CCAGAAGAACAAAAATCTGA	34	1.30769
GGGTTTGATCTAGACATAAC	34	1.30769
AGGGGCAGACACCCTTTTCA	34	1.30769
GCAAGGTATAAGGTGGGCTT	34	1.30769
ACCAATCGTAATTTGATTTC	34	1.30769
TCTGGAGTTGCTTCAGAGTC	34	1.30769
GCTTATTTATGTGGCTTGGT	34	1.30769
GTTATTGAGAATGATGATGC	34	1.30769
GACTACCATCTATGATCTGC	34	1.30769
TGCAAATTTGAAAGATTAGG	34	1.30769
CATATTCGAAATTCTGGCTC	34	1.30769
TTTCACACACGTGCACCTTT	34	1.30769
GGTCCTGTGAAGCTGTGTGC	34	1.30769
ACTCCCCAGATTAGGGCTTT	34	1.30769
GATACCGTTGGATGATGTTC	34	1.30769
GCTGAAAAGTGGGGTTTTTG	34	1.30769
CTTTTCAACAGCCGAAGCCC	34	1.30769
TAAGCGCCCCAGGATACAAG	34	1.30769
GATTGGTCAAACAATGATAG	34	1.30769
TGGTCAAACAATGATAGTGG	34	1.30769
ATCTTTCAGTGTAATAGAAG	34	1.30769
TAGGCACGGTTGAACTGCTA	34	1.30769
AAGGGAGTCGATTACGCGAA	34	1.30769
GGTTTATATGGTCATAGCTT	34	1.30769
TGGGGAGCATGACCAATAAA	34	1.30769
AGCTTTGGTTTGGCAGGTTA	34	1.30769
ATATACTCTATAAATACCCC	34	1.30769
CTATCCAAACCATTAGAACA	34	1.30769
TGGACGGTTCACCGAATGGA	34	1.30769
ACGCTAGACTATATTTCAGA	34	1.30769
GGACCTAAGCATTGCAATAA	34	1.30769
AGGACCTAAGCATTGCAATA	34	1.30769
GGGCATATGTGATCTGTTTT	34	1.30769
CTGATTCGTTTGAGAGAACA	34	1.30769
TGAGAATATGACATGGGAAT	34	1.30769
ATGAATGAAGATGAAGAACT	34	1.30769
CGCGCGCTGGGCAATTTTCT	34	1.30769
GAGTGATCTTGGCAAAGGGC	34	1.30769
GACATGTCATATGAGGCCTA	34	1.30769
GTCACTCTAACACACTCCAT	34	1.30769
GAGGGTGGAGAGGTGTGAAC	34	1.30769
AGGGTGGAGAGGTGTGAACA	34	1.30769
CTTTTATAGCCAAATTCAAG	34	1.30769
GGACATGTTATTTCAGGTGA	34	1.30769
TCAAAGATTTTTGGGTTCGA	34	1.30769
GAAAGGTTGGGAGAAGAAGC	34	1.30769
GTTGGTGCCATGAGATAATA	34	1.30769
AGTTGGTGCCATGAGATAAT	34	1.30769
TTATTGATGTATTGACGGTA	34	1.30769
GGTCTGTCAGCCCATTTACT	34	1.30769
TGACAACACACTCCCTTTTA	34	1.30769
GGAGTGAAAAGTCACTAGTG	34	1.30769
TTTGAACAAGATCACTCTGG	34	1.30769
GTGGTGGTCATAGAATGTTA	34	1.30769
ACTCAACCAACAGACCCACT	34	1.30769
CTGGGTGTGAGTCTGATTAT	34	1.30769
CCATGGCATTTCTCTATGTG	34	1.30769
TCAACTTGCTGGGGAATACC	34	1.30769
AGAAGAGAAGAAGAAGCTGC	34	1.30769
TAGTAGTGCCAATTCCTGCT	34	1.30769
TCTCTAGCTCTACGTCAGTT	34	1.30769
GCGATCGTTGGAATCGTGTT	34	1.30769
ATGAATGGTTACAGCAGCTT	34	1.30769
CTTTGCCACCACAGCAGGCG	34	1.30769
TGTCATGTTGTTGGTGACTC	34	1.30769
ATTTCCCAAATCTTCAGAAA	34	1.30769
TTCCATAGCTCAAACAGTAG	34	1.30769
GGTGGCAAAATGATGTGTTT	34	1.30769
AGGTTTATATCCAACTTGAG	34	1.30769
AAAGCATTTCGATAAGAAGT	34	1.30769
CTTGCATATGTCTGCATTAA	34	1.30769
TGATCGTCCCTTCGAATGCT	34	1.30769
AAAACCTGAAAAGGTGATCC	34	1.30769
CAAGCTGGTAGAGGATTCAG	34	1.30769
GCTGGTAGAGGATTCAGAGG	34	1.30769
CTCTCTGCTGGTACGCGTAT	34	1.30769
AACTTGCAAGTGAAGCAAAG	34	1.30769
CTTCTCGTGCCAATCTTTGT	34	1.30769
TCTGTGTAAGTTATTGGAAT	34	1.30769
ACACCCAAAACCCAAAAAAT	34	1.30769
TTCCAAACACTGGAGAAATA	34	1.30769
GCTAGAGCCAAAGGGCTAGT	34	1.30769
GAACATGGGTCCTAATGTAA	34	1.30769
CATTCTCCTCAAGAAAGGTA	34	1.30769
AGAATTCCTCAAAGAAAATG	34	1.30769
ACACGAGGAACAAAGGAAAA	34	1.30769
TATCCAGAGTTATTCATTTG	34	1.30769
TCCAAGTCATCCATGTCAAG	34	1.30769
TATTAGGGATAGCTTCTAAA	34	1.30769
TTCTGATTTTGGGGCTATTA	34	1.30769
AAATTCCATACCTATAGCCT	34	1.30769
TTGATTCAATTAGTGTCCTT	34	1.30769
AATGCCATGTATTCTCTAGG	34	1.30769
CTAGATTCTCATAGCAGAAG	34	1.30769
GAGGGTCCTGACCAGTCATC	34	1.30769
TCACTCACTCCGACATTGTG	34	1.30769
GGGATCAAGTCCCTAAGGCA	34	1.30769
CAGATTAAAAATGGCACCAG	34	1.30769
CCCACGTGTGGACTGACTGT	34	1.30769
CCCACAGTCAGTCCACACGT	34	1.30769
TTTTGAATTTCCATTTTCGG	34	1.30769
TCAATTCTCTTCACTCTTGC	34	1.30769
AGTCTCGCAGTCTCCCGCCT	34	1.30769
AATGGTAAAGGGAGAGGTTA	34	1.30769
TGCTTGACTTTAAGGCTTGA	34	1.30769
GGTAATTTTCACTGTAGACC	34	1.30769
TTCGGCCAAACTCGTCATGC	34	1.30769
ACCTCCTTCATTACACCTTG	34	1.30769
GACCTCCTTCATTACACCTT	34	1.30769
TTAGTGATTGGGTACTGATA	34	1.30769
TTCAACATGCCAAAGATGTT	34	1.30769
GGGTTCTCTTCAAAATCATA	34	1.30769
TGTCGCTTCTTGCTATATTG	34	1.30769
CTAAAGACAATTGCTACCTA	34	1.30769
CGTGGTGATGGCTTGCTCTT	34	1.30769
GAGAGGTAAAGAGATTCCTT	34	1.30769
ACCAATTTGTTCACGTAAGT	34	1.30769
AAAAGAGGTAGGGAAAATTT	34	1.30769
TCTTTGTAAGGGATTAAGCC	34	1.30769
GGTCGGCTGAGTTTGGCAAG	34	1.30769
ACAGATTTTCTCTTCTTTTG	34	1.30769
CAATGGTGTAGCTACTCAGC	34	1.30769
AGGTAGAAGCGGTATCTTAG	34	1.30769
CTAGGTTTTCAAGCTCGTTG	34	1.30769
GCTAGGTTTTCAAGCTCGTT	34	1.30769
GGAACACTAGATCCGAGTGT	34	1.30769
CGGGTCTATGAATAATCAGA	34	1.30769
TAAGGATTGGCACTGGTACA	34	1.30769
TTATATGTAGAAGATTGGCA	34	1.30769
TTCCTATTTTTGGTCATGCT	34	1.30769
GGGATACCTTTAAGATAGGA	34	1.30769
AAAGGAATCGAGCATGAGTT	34	1.30769
ACGAGGTCATTTTACTCTTG	34	1.30769
CTGGGGCTTTGAATTTTGCA	34	1.30769
CTGTACTCAGCTTGAATTGG	34	1.30769
CATGCTTGAATGCAGAATTT	34	1.30769
CTGGGGAAAAGGGAAAGCAC	34	1.30769
GAGTGTGGGTCTCCTCGCCT	34	1.30769
GCTTTTCCATTCTCGAAGCA	34	1.30769
AGTTAACCATATGCGTTAAT	34	1.30769
GGCTCAAGGAGATCAGTATT	34	1.30769
CGGAATCACCATACACCTCT	34	1.30769
ATTGACTGCCAGGTCAAATT	34	1.30769
GAGAGGTTGATAATTCGTAT	34	1.30769
AACAGCGCCAAAAACTTGAT	34	1.30769
AATAATATCAGTCAAGGACT	34	1.30769
AATACCATGCCCCAAAGAGT	34	1.30769
TACGTTATAATAACTGTTGG	34	1.30769
CGACCATACAAAGCTTCGAA	34	1.30769
TTATGCATCAAGGCAACTGA	34	1.30769
GGAATTAGTACGTATCAGTG	34	1.30769
GAAGCGAGAACCTGGGATTT	34	1.30769
TAAAATTTCCTCTTCCTGTT	34	1.30769
TGTTGTGAAATTCCATGTTT	34	1.30769
ACCAACTCAACTCAGTACCA	34	1.30769
AAGTGATGTCTTCTCCCTCT	34	1.30769
GATTTGAAGCCCAAGAAAGT	34	1.30769
GAGAGTTAACCTACTTTCTT	34	1.30769
AACTGAAATCTAACCTTCCC	34	1.30769
AGGTACAAGACCGATATCTA	34	1.30769
TCATCCCGGCAAGGCTAATG	34	1.30769
ACTTACAAGGATTGCCGCTC	34	1.30769
GGAGTTCGCTCAGCGAAGGG	34	1.30769
GTGTATGAGTGGTTGTTTGA	34	1.30769
TTAGTAACTTGTGCCTTATT	34	1.30769
AAGGAAGTATATGAAAGACT	34	1.30769
CTTTAAGGCCATACTTCGAC	34	1.30769
GAAGGTATTCAAGGCTGTTT	34	1.30769
TTCCACTCAAGACTGAAGCT	34	1.30769
ATCTGGTAATTGTCAAGGTT	34	1.30769
CTTCTCTAGCAATGAGTATC	34	1.30769
CTATAAGAACGGGAACACTC	34	1.30769
AACCTTCACATCCATGACAT	34	1.30769
CTTGAGGCTTCAGTTGATTT	34	1.30769
GAAAACAAGCTCATGCTGAA	34	1.30769
AAAACAAGCTCATGCTGAAA	34	1.30769
CAACATACTCAGTAACAGAA	34	1.30769
GTCCATTGGATCAACATGGA	34	1.30769
AGCATCCTAACATGTCCTAG	34	1.30769
CAATGCTGAAGTTTATGGAA	34	1.30769
GAGATTGTAAGGGAATTTAA	34	1.30769
CAAAACTTTCAACTACACAG	34	1.30769
GGCTATCATCATTTAATCGT	34	1.30769
GGTCATGTCCCGCAAACGTA	34	1.30769
ACCCGTTCCAGGTTACATAC	34	1.30769
GCATGATTTAGAGTTGGCAG	34	1.30769
GGGTCCTTTTCGAACCCTAA	34	1.30769
AAGATTTTGGTTCAATCCAA	34	1.30769
GCTTGGTTGAGGCCTCTTTA	34	1.30769
TAACGCGGTGAACTGACTTA	34	1.30769
CATTCAAAAATAGGGAACCC	34	1.30769
GAGCTTGTGTTCTTGAGCAA	34	1.30769
TGAGGATTGACCATCAGAGG	34	1.30769
GGTTGAGGATTGACCATCAG	34	1.30769
GTGGTGGAAGGCCCCCTGGC	34	1.30769
TATTGACCCTTTTGCCTCAG	34	1.30769
ACTGTTGGAATTTGAAGAGT	34	1.30769
ATTCTCAATAGATTTGGTAC	34	1.30769
GATAGATGGACCCTTGTTGG	34	1.30769
TCAGCACGAGGTCACCAACC	34	1.30769
GATAATCATAGGAGTTATCA	34	1.30769
TCCATCACTCGAGAATCAAA	34	1.30769
TCAGAAAAGTTACCTGAGCC	34	1.30769
AGAGAGGATCGAAAGACTTG	34	1.30769
GCCTTTCATAAAAACCCTAA	34	1.30769
CATATAGCGTGATAACCACA	34	1.30769
TGCTATTGAAGAATGTGTCA	34	1.30769
TTGGGCTTGTGACGGGCGTA	34	1.30769
CGCTTATACCGATGACCATT	34	1.30769
GTTGGTGAAGGTGGTCTGGT	34	1.30769
TTGAGTTGGTGAAGGTGGTC	34	1.30769
CAAAGGTGGCAAAAATGATT	34	1.30769
AGTGGTGAAACTAGTGGATG	34	1.30769
CCAACCGTTCCAAGAGCCGA	34	1.30769
TCACCAATATCTTCCCCAAG	34	1.30769
AGATCAATTTAAATTCAGCG	34	1.30769
ATATTGTGATGAAGTGGTTG	34	1.30769
CAGCCCCAACTTGTGCAACT	34	1.30769
AACGCATAAAAGAGGTTTTT	34	1.30769
CGAGATTTACATCAAAGTTT	34	1.30769
TGAAGGTGGAGAGATTACTT	34	1.30769
ATAAGTCGTTTAAGTTGTCG	34	1.30769
TAGCAGTTAATCAATCACAT	34	1.30769
AAGCAAGTATGTGGATCAGT	34	1.30769
AGCAGAAATGATAACATACA	34	1.30769
AATGATATCACAACCTTGAC	34	1.30769
GGCAAGTTGATTTAGGCATG	34	1.30769
TCCCAGAGAAGTTACCATGG	34	1.30769
CGTTTATCTTTTGTCACAAC	34	1.30769
TCTTGAGTTGAGTAGCTCTG	34	1.30769
ATCCTCTTATCAGAGTTTTC	34	1.30769
AAAGCAAGTGAGAGGTTTTC	34	1.30769
GGCTGCTACATGTCGGTGTT	34	1.30769
GTACAACCTTGATAATGTGC	34	1.30769
TGATGGACTTAACAACTGGA	34	1.30769
TTTTGAGGATAGGACTCAGC	34	1.30769
ATCATGTGATGTGTCACGGT	34	1.30769
TAAATATCCCCAGCTAGAAA	34	1.30769
CATCTTTCTTTCTGTCGTGT	34	1.30769
AGTGATTGATGAGTTTCCAG	34	1.30769
TACGCGTATGGTACACGTAT	34	1.30769
GGAGCAATTAAAAGAAAGTT	34	1.30769
TGTTGCCTTCAACTTTGAGC	34	1.30769
GCGTGTAGTTTGGCATGGTA	34	1.30769
AGTTCCATTTAGCCTCGTCC	34	1.30769
AAAACCCGAAAGTTTAACCT	34	1.30769
AAACCCGAAAGTTTAACCTG	34	1.30769
CCACGAAGTTGGGCACATTA	34	1.30769
CCCTAATGTGCCCAACTTCG	34	1.30769
TGACTTAGAGTTGGCTGCGG	34	1.30769
GGCTCTTAAGATAAGAGAGG	34	1.30769
ATGTGAAGTGGGAAAATTTT	34	1.30769
CTGAGCTTGAACTGGAGGAG	34	1.30769
GATTATGAGATCTTCCTATG	34	1.30769
ACCCTCTTGAAGTCTCTGCA	34	1.30769
AACCCTCTTGAAGTCTCTGC	34	1.30769
AGGCTAATAGGTTTGTGGTG	34	1.30769
CATGTCAAGAGTCAGTTGAT	34	1.30769
ATAAAGGGATCAAATCCCTA	34	1.30769
TATAACTTGGCTGATAAGCT	34	1.30769
TGATTCGATTTGGGTCATTG	34	1.30769
GTAACACACTCTGACTCCTC	34	1.30769
TACCCATTTTTCCAATCTTA	34	1.30769
CAATCTGTTTTGGGTCTATG	34	1.30769
TGATCCCCAGCAGGTCATGG	34	1.30769
CTGAGTGTGAGTTATGATTC	34	1.30769
TTCCTCATACTCAAATTGAC	34	1.30769
GTGGGGCCAAGCGTTATGGA	34	1.30769
TCCAGTGGGGCCAAGCGTTA	34	1.30769
TCCGAATTTCGACGGGAATC	34	1.30769
CTTTGGTATGGTTTTGGACA	34	1.30769
TCGTGGGAAGCAAGGCCCAT	34	1.30769
TTGGATGGTTAAGTTAGTGG	34	1.30769
TCTATAGAAATGCAATAGGC	34	1.30769
AAGAAAAATGTCTTGGCCCA	34	1.30769
ACTAATGATAGATTCCTTTG	34	1.30769
AATAACAAAAGGGAGGGCGC	34	1.30769
TGTACATTCGGATAATTGAT	34	1.30769
AACCCTTAGCATACTTGTTT	34	1.30769
CTAGTGGCGAATGTGTGTGT	34	1.30769
CAACACACACATTCGCCACT	34	1.30769
ATGGCACAAGGTTTAGGTTT	34	1.30769
TAGGCCTTTTGGAAGCAGAT	34	1.30769
TGTAAAGTGTACTCCCACTG	34	1.30769
ATGTTTAGGATGAATTGTTG	34	1.30769
TTGGATCAAGGTGAAAAAAT	34	1.30769
TGCTATGCTTAAGGCCAAAT	34	1.30769
TTTGCTATCAGCTGGATGGT	34	1.30769
AGTTCTCCTTTGCTATCAGC	34	1.30769
TTGCTTGAATTTGGTTTGAT	34	1.30769
AGAATTGGAAGGTGTGGTGA	34	1.30769
AGGCTCAGAATTGGAAGGTG	34	1.30769
GCTTTTTGGGATCACAAATT	34	1.30769
AACACAGATAGACACTCACC	34	1.30769
GAACGAGAAATCTGGACCGC	34	1.30769
TCTTGATGGATTTTGATCTC	34	1.30769
GTTATCCGCGACTTGCGCTG	34	1.30769
TTGATTGGCTATTGAGATAA	34	1.30769
GCTTCCAAGATTCAAACATT	34	1.30769
ACCAGAACACGCTGCCTGTT	34	1.30769
TCCAAACAGGCAGCGTGTTC	34	1.30769
AAATTCTGCTTGGGTTTCAA	34	1.30769
TACCAACACACGAGATAAAG	34	1.30769
GCTGAAGGCTGTGGAAGAAC	34	1.30769
ATGAACTTTGGTGAGCTTTT	34	1.30769
AATTATTGAGGAGATGCATG	34	1.30769
TAAACCTATGATAGTATGGT	34	1.30769
GAAATGGAAAGATGATCATG	34	1.30769
AGGTCAAAATTCCATCAATG	34	1.30769
TTTTAACTTCTGATGTAACG	34	1.30769
TCGCTATGAACTGCTGCTTG	34	1.30769
CTCGCTATGAACTGCTGCTT	34	1.30769
ACAAGTCATATGTGAGGTTT	34	1.30769
ATTGCCCGAATGGTCAGAAG	34	1.30769
AGGAGTGTGTTGGAGGGCAC	34	1.30769
AGTGTGTGTGAGAGGGTTTT	34	1.30769
TGTTGGTGGGTCTTTTTGAC	34	1.30769
CCCAACCATTCTATCATAAA	34	1.30769
CCTTTTATGATAGAATGGTT	34	1.30769
TCTAAAAGCAACCGAATAGA	34	1.30769
GTTATAGGTGCAGTAACTTT	34	1.30769
CAACACCGAGAATTTTATAC	34	1.30769
AGAGAAAAGCATATGATAGA	34	1.30769
GAACCCGGTTCTTATGCAGG	34	1.30769
TAAACCACCTGCATAAGAAC	34	1.30769
TCGGGTGTTTTCTGACTTAG	34	1.30769
ATCAAAATTACAAGGTAAGG	34	1.30769
TAAACGACATTAGACAAACT	34	1.30769
GGAGAGTGTTTTAGGAGGCT	34	1.30769
TTTTAGGAGGCTTGGTTCAA	34	1.30769
GATTGGATGATGAGATAATG	34	1.30769
TGATTGGATGATGAGATAAT	34	1.30769
TTCTAAGGTGATGTTATTCA	34	1.30769
AGGGAACACCCACAAGACAG	34	1.30769
ACCGCCTTGATCGAAAGAGG	34	1.30769
TGATGTGTCATAATGTGGCT	34	1.30769
TGGAGGTTCAGAAGTTAGTG	34	1.30769
GGAGGTTCAGAAGTTAGTGA	34	1.30769
AGCCCAAAAAATGCCTGCCA	34	1.30769
CGGGGATGTTTTCGATCGCC	34	1.30769
TTATAGAGAGAAAACTCTGT	34	1.30769
AGGGCTTTTGAAATGGTGTC	34	1.30769
ACTATCACCTTCTTGCTTGT	34	1.30769
GGATCGAAGGCGTCACCAAG	34	1.30769
AAGAAAAATGCAAAGTCAGT	34	1.30769
ATGTTGTCAGTTTTGGATTT	34	1.30769
AGTGAACCTATGATTTTGGT	34	1.30769
TTTTTGGGACTATTGAGCTG	34	1.30769
TGATGAAGAACGGCGTACGC	34	1.30769
AAAATCGGTTCTTCAATGTT	34	1.30769
CCCCCCCCAGTGTCAGCCGG	34	1.30769
CCCCCGGCTGACACTGGGGG	34	1.30769
GATCGAATCTGTAATCGAAT	34	1.30769
AAAGCCAAGGAAAAGTAAAA	34	1.30769
GTATATCAGAAGCTGTACAG	34	1.30769
GCATGTCATGAAATCCTCTC	34	1.30769
CTTGCCTTCTTGCCAGAGCC	34	1.30769
ACATGGGATCATTGGTATAA	34	1.30769
TGGTCATAGTTTTAGCATTA	34	1.30769
AGTGCAAGACTTGAAACCTT	34	1.30769
GATCCAATTGAGAGGGGAAC	34	1.30769
TTAGCAGTAACGCCAGCATC	34	1.30769
TTTTCGAAGATGTTGCAGAT	34	1.30769
TGAAACAAGGAGAACAAGTA	34	1.30769
ATATTGACAGATGCAGGTTT	34	1.30769
GAAGAGTGAGGGGTTTAGAG	34	1.30769
TAAAGGGTGCCAAGTGTATT	34	1.30769
AACTGTTTCACCTGATCGAG	34	1.30769
CCTGTCAAAAGGTCCTCTCC	34	1.30769
CCTGGAGAGGACCTTTTGAC	34	1.30769
TAAGGACAAGGTAAGTAAGA	34	1.30769
GCAGTTGTTTTGGATTTCTT	34	1.30769
GCCAGTGGCTTCCTCTCCTG	34	1.30769
ACCTTATGCACAAACTCAGG	34	1.30769
AACCTTATGCACAAACTCAG	34	1.30769
CTTGGTCAAAGAATTTTCTA	34	1.30769
AGAACTATGCTCAATGAGGG	34	1.30769
CAAAGCATCCATCAAGATCA	34	1.30769
ATTGAACCGAAAGCCTCAAA	34	1.30769
TTGGGATTTGATTATCAAGT	34	1.30769
GGGGGTGAGAAAGGCAAAAG	34	1.30769
TTTAAATCCCTTCTTCCAGC	34	1.30769
CACTCCAGTTCCACATCTGG	34	1.30769
TGGCAATGAAGCATGATGAA	34	1.30769
ATCGAGCATCAGAAACCTTC	34	1.30769
GTCTGATTGAATCTAAAGAT	34	1.30769
TTTCTTAACAAACTGGAAGG	34	1.30769
TGATGAAACATGTTTGATGT	34	1.30769
CGTCGAAGTTCGTTGAGTCA	34	1.30769
GAACTTCGACGCTACGGAGT	34	1.30769
AAAACAAGGACCTTTTGGAT	34	1.30769
GATCAATCAGAGGGCAATTT	34	1.30769
AGCCGAATTCAGCTTGTTTT	34	1.30769
CTGCTTCAGCATCAAAGATT	34	1.30769
GAGTCAGTTTGGTTAACTTT	34	1.30769
AGAAGTAGTGATCGACCCAA	34	1.30769
GATGTCTTCGAGTTTCGAGT	34	1.30769
AGGTGGGGGACGCGGCGCGA	34	1.30769
GCAGTTGTGTATCAGACAGA	34	1.30769
CTACCTTTTAAAAGCTCATA	34	1.30769
TCACCATCATCACTAACCTC	34	1.30769
ATTCTGGAAGAGATTCGGAA	34	1.30769
TATCCATATCTGCCTCTGAA	34	1.30769
AGGGGTGGTTTTTCTTATGC	34	1.30769
CCATTCCAGCGGACATACTA	34	1.30769
GGAGAATCATCTGGCCACAG	34	1.30769
TGTCTGTTTGGCTAGTGGTT	34	1.30769
AACATCTTTTTAGCTCCTTC	34	1.30769
ATCGGTGATATGTCGAAGTT	34	1.30769
TTCGAATGAGTGGGGAAGCT	34	1.30769
TCGCAGGAATGATAATGACG	34	1.30769
ATTGGTGGATGAGTTTAGTG	34	1.30769
AAATGGGAAACGATCCAAAA	34	1.30769
AATGGGAAACGATCCAAAAG	34	1.30769
ATTTTCTCCCAATACATGGG	34	1.30769
ATTTATAGGAGGATCAACTT	34	1.30769
GTTGAAGAAGCTGATCTCTT	34	1.30769
ATTTACCAACTCACGGTTGA	34	1.30769
TCTTAGTGAGTTGTGGTTTA	34	1.30769
AAAAACTCATTCTGGCAGTT	34	1.30769
GTTTTGGCCTATGGGAGTTG	34	1.30769
ACCATTTTCATCAGAACTTC	34	1.30769
AAACCTAAGATATCCAGATT	34	1.30769
GGGTAAATGGTCTCCAAAAT	34	1.30769
AAGTGCTTTTGTATAACATG	34	1.30769
CATGTTTCGCTGAGCGAAGC	34	1.30769
GCACCATACAATGAGGCTAA	34	1.30769
TGGAGTTGATAATATGGCTA	34	1.30769
TGTGATATGGGTATATGTAT	34	1.30769
CCCTGTGGCTTCTACAGTTG	34	1.30769
GAAGAGCTCTTCATTAGGAG	34	1.30769
AGTGTACCCCACTTTGGTTA	34	1.30769
AGCTAACTCCTCTGAGGAAA	34	1.30769
TAGGCTATATTTGATGAAGT	34	1.30769
GTAATCATCGACTGGCTGGT	34	1.30769
ATCGAAGCGGGTTTGAAGTT	34	1.30769
CGGTTGTGACTAAAAGGTAA	34	1.30769
TTGAAGCGTATTGCACAATT	34	1.30769
CTGGTGGACTGTGAAATTTT	34	1.30769
TTGGGAACCTAAGCTAAGGC	34	1.30769
ATGGTAGCATTATACTTGTA	34	1.30769
GCGTTTTGGTGGTGATGTTG	34	1.30769
TTTCATAGTACGGGTATGAA	34	1.30769
TTTTCATAGTACGGGTATGA	34	1.30769
AAGGCATTATGCTCGTTTTA	34	1.30769
TCGATGTTGCTGTTGTTTGA	34	1.30769
TGATAATAAGATCCCCCACT	34	1.30769
AGAAGATGGAGAAAGGGCAG	34	1.30769
GAAATTGGGTACAGAAGGTT	34	1.30769
AGATTCAAATACACGGGTCT	34	1.30769
TGGGGTGTTATCCCAAATTG	34	1.30769
AATGGGATTTTGTTGATTTG	34	1.30769
AAGCGAGTCAACCCTAGCCT	34	1.30769
GTCGAAAGAGGCGTAATGAG	34	1.30769
ACACCTTGTGTGGAAAGTGT	34	1.30769
ACAAGCAATCAACATACCAT	34	1.30769
TTCTCAGATGTACTTTTTTG	34	1.30769
GAGTGGAGCTGAAGCACCAA	34	1.30769
AAGATTGATGAGAGAACTTT	34	1.30769
GCTTGAAATTTGGTGTTTAA	34	1.30769
ATCCATTATAACTGCTACTG	34	1.30769
GTCCACTGAAGAAAAATATG	34	1.30769
TACGTAACACCGAGGTCATT	34	1.30769
CCAATGATATTGAATCCTTT	34	1.30769
ATAAGAAATGGATGCAAGAA	34	1.30769
AAAAAGGGTCAAATCCCCTG	34	1.30769
TTTTGAAGTTGTAGCTGAGT	34	1.30769
CAAAGGAATAAGGAGCATAG	34	1.30769
CTAACCTTTCTGTCTTTCTT	34	1.30769
GAAGCAACTAGCTGTAGCTG	34	1.30769
GCTTGGCTTGACAGGAATTG	34	1.30769
GGTGAAAATGAGACATAATG	34	1.30769
CGTAAGAAATCATGCACACA	34	1.30769
AACTGCGTTGCTGTTCGCAG	34	1.30769
TGGTTGGAGTGCCTTGAGGG	34	1.30769
AGACGAAAGATACATGGAGC	34	1.30769
AGCAGATGAAGGAGCAATCG	34	1.30769
CATCAGAGAGCATCTCTTCT	34	1.30769
ACAGTGTTATCTTGGGGAGT	34	1.30769
CAGTGTTATCTTGGGGAGTA	34	1.30769
AGTGTTATCTTGGGGAGTAG	34	1.30769
GGCAAGGCGGCCAAAGCTGA	34	1.30769
GCTGCTTGAGCAGCTAGCAT	34	1.30769
ACATCAAACACTCTTCAAAT	34	1.30769
AGGTACAGCTGAGTTGGTTT	34	1.30769
ATTTTTGGCTTATGTGCACA	34	1.30769
AGTTAGTAAAGAAGGAAAAG	34	1.30769
GTTAGTAAAGAAGGAAAAGA	34	1.30769
GAACCAACTCCAGCAACATT	34	1.30769
GAGGATGAAAATATTCCAAG	34	1.30769
GTCCCACATCCTGATGGTCA	34	1.30769
GAAAGAATTGTGAGTCTGCA	34	1.30769
TCAGGTCCTTCGTCTGGTCC	34	1.30769
TTTGGTAATCAGTCAGATCA	34	1.30769
TCTCGGTAAGGGATGAGGTT	34	1.30769
GATGGGTGCCTAGTCTCATT	34	1.30769
TCTGTCGAAGTCGAAGCCAG	34	1.30769
GATTGTATTAGAGCGGTATG	34	1.30769
TGATTGTATTAGAGCGGTAT	34	1.30769
GCATTGTCGCTGAGCGAAGG	34	1.30769
CTGAAAGACTTTGCATATGT	34	1.30769
AGAATATTGGTCTTAAGATC	34	1.30769
TTAAGAGTTACTTCGGTAAC	34	1.30769
CTCAATCACAACCCAGGGAA	34	1.30769
CCTTCCCTGGGTTGTGATTG	34	1.30769
AGGGTTTGGGATGGATTTGG	34	1.30769
GAAAGTGGTATTGAAAACTT	34	1.30769
AAGAACGTAAAAACAGAGAA	34	1.30769
TGGTCAAAAGAGGTGTTGCT	34	1.30769
CTTGACTTGTCAGAAGTCTA	34	1.30769
GCGAACAACAAAATTCTCAC	34	1.30769
GACGAACGTCACACCTTAAA	34	1.30769
TAAGAAAGGAAATAATCGTG	34	1.30769
AACAGAGTGCTCTTCTAGTT	34	1.30769
GCTTAATCCTAGAAAGGAGA	34	1.30769
GTGATGCCAAGGTATTGGCA	34	1.30769
TCCGTCATTCGAGAATCAAA	34	1.30769
GTCTAGAGAGGAGGCGGAAG	34	1.30769
CTCAGTGATGGGTCATGCTC	34	1.30769
GGTCGAATTGGTCCTGTCGA	34	1.30769
CTGAAGAGATATCCTTGAAG	34	1.30769
TAGGTTAGGGTGAGTGGAAA	34	1.30769
CTTGAAGAGGTGAAACTCTG	34	1.30769
GAGTTCATCACGAAGTGGGA	34	1.30769
TGTTATTCCATAATGATTCC	34	1.30769
ATATGGGCATTATGAGTATT	34	1.30769
TATGGTGGTGAATATGGGAG	34	1.30769
TGATTTGGGTAATTATGGAT	34	1.30769
GAACTAGCACAAATTGCATC	34	1.30769
TCAGAGTTGAAGTCCCAACT	34	1.30769
CCTTGGGGTTTTTGATCTAT	34	1.30769
AACATGAAACTCAACATGAA	34	1.30769
GGGGTTCTGGTGCAAGGTGG	34	1.30769
AGTCTAGTGTAGTTCCGTAG	34	1.30769
TGATGTTGGCAACCATGGAT	34	1.30769
GATGTTGGCAACCATGGATG	34	1.30769
GGGTATAGGTCATGACAGTT	34	1.30769
TGCGATCCTTTACCCGGATC	34	1.30769
GGTTATGGATTGGTATGGGT	34	1.30769
TTTGAAATGAAAAGCCAAGA	34	1.30769
GTTTCATCAACATGGGAAGA	34	1.30769
GTGGTGGAAGTGTGGAATTT	34	1.30769
GAAGAAAGATCCATGACCTT	34	1.30769
CAAGGTCATGGATCTTTCTT	34	1.30769
TCTGAATGAGTGAAAGATTG	34	1.30769
CAAAACAAAGCAAAAAAAGG	34	1.30769
TTGAAGGAGTCACTTGGCGT	34	1.30769
ATCTGAAGAGATTGTTTTGG	34	1.30769
GGTTGAGGTCCATAAGAAGT	34	1.30769
GGTCCATAAGAAGTTGGCCA	34	1.30769
ATTTTGAGTGAAGCACCAGC	34	1.30769
GGAGATTGAATAAGAATCTT	34	1.30769
CACCAAATTCACCTCAAACC	34	1.30769
TGGTATCAGAGCCTGGTTCT	34	1.30769
GTCGTACCAACTTTTACTGA	34	1.30769
GATCTTGGAATTTGGATGAA	34	1.30769
AGAGAAAATTGTTTGTAGGA	34	1.30769
AAGGATGAATATGTGACCAT	34	1.30769
CTCTGAAATCGGCAAAGATC	34	1.30769
TTAATGACTCTGACACAGCA	34	1.30769
TCAGGCAAGCATTTAAACAT	34	1.30769
TGATTCTGTTGGAAGTTCTG	34	1.30769
TCCACCTGAAAAAGGAAGGA	34	1.30769
GGGGGGTGTATTTTCACAGA	34	1.30769
TCAGATTAAGACTGTCGTGT	34	1.30769
CTGAGAGTAGTAGTATCGAG	34	1.30769
AGATGGAAGCTCGTGTTCGA	34	1.30769
GAACCTCCTTTCGGGATACC	34	1.30769
AGAGATGTTGAGGGTTTTGT	34	1.30769
TTCCTCGTCAATTGGGTTAA	34	1.30769
GATGACATACTCACAATTGC	34	1.30769
AACATCACAAAGAATGGGGT	34	1.30769
CGTTGGGAGGCGTGAAGACC	34	1.30769
GTCAATTTGAAGTTGAATGA	34	1.30769
GATATTGGATGATGATGATT	34	1.30769
ATCGATGGAACAGGGTATGG	34	1.30769
CGGAAAATCCTGTTCCTCAA	34	1.30769
GTTCATGGATACAGAAAAGG	34	1.30769
TTGAATATGAGATGAAGCAG	34	1.30769
GTGACAGTACATTCTCCACA	34	1.30769
AACCCCCATCAAAGCTCGGT	34	1.30769
ATCCCATAAGGACAGCTCAC	34	1.30769
GAGGGATGAGAAGTTAGAGA	34	1.30769
TTCTTCTGATGTAAACATCT	34	1.30769
TGAGTGGGAGTTCTGAATCT	34	1.30769
AGTATATGCAGACATTCTTC	34	1.30769
GGAAATAACCATGACCAATG	34	1.30769
TTCATCTGAAGGACAAGCAG	34	1.30769
CTTAAAATGATGAACAAGTG	34	1.30769
TGTTTGAATGGTTTGGCTAT	34	1.30769
GACTTGTCCCTGGTTGACAC	34	1.30769
GTTGAACTTTGAAGAGGTTG	34	1.30769
GGAATCCATTTCATATTTCA	34	1.30769
AGAAGCCATGAAATATGAAA	34	1.30769
ATTCCTCCAACTCACTTTAG	34	1.30769
AGATTCCTCCAACTCACTTT	34	1.30769
TCGTTTTGATCGTTTTGATT	34	1.30769
TTCTGGTTTCCGTGGAAGAA	34	1.30769
GGTATATGGACCAAGGATGC	34	1.30769
TGTGTTAAACCTGTCCCAGA	34	1.30769
ATGTGTTAAACCTGTCCCAG	34	1.30769
TTCTCTGTGTTGGGTCATCA	34	1.30769
CGGTTGGTAGCTCCCCTTGT	34	1.30769
GGCATTAGAAGTATGGTTGA	34	1.30769
TGGGAGGCAATATGATCTCA	34	1.30769
CTGAAGGCATTTCGTTCGTG	34	1.30769
ATGGTTGAGGATATCCTCCT	34	1.30769
AGAAGGGCAGGATGAGAAAG	34	1.30769
GCAACTCTTCCCGTCAGAGT	34	1.30769
CAAATCAAAGAGGAGGATGT	34	1.30769
GATGCTGAATTTTGAAATTC	34	1.30769
AGGCTTTCTTCATCTTCTTC	34	1.30769
CAAGCTATTTTTGGGAATTG	34	1.30769
TGAGATCCCCCTTTAGTTCT	34	1.30769
GTATGATGCCCCAGCTGGTA	34	1.30769
ACATGGTCATCTGTTGTGAC	34	1.30769
GAAGAATAGATTTCCTTATC	34	1.30769
AGACTAGAGATTCTTTAAGG	34	1.30769
TTTCAAAACCTCAACCTTAT	34	1.30769
TCTTGTTGTTTGGATTTTGA	34	1.30769
TTAGTTAGTGGGTCATGCTC	34	1.30769
AACCTTCCTGTGAGGTGGGG	34	1.30769
GCCGATTATGGGATTACTTC	34	1.30769
[truncated: 58,001 more rows]

## Sheet: Guide Pool 3
gRNA target sequence	number of targets	Relative frequency
TTCTGTTAATCGGTTAACAA	30	1.15385
TTTGGGATAAACAATGCTGG	30	1.15385
AATGATTTGAACGCTTGATT	30	1.15385
TTTGAAGCCAGAAGAGGAAT	30	1.15385
TCGTTACAAACGTTTGAGAT	30	1.15385
ACACCCAGCCTCTTCTATTC	30	1.15385
GTTTTGCGTGTAAAAACGTT	30	1.15385
GAATAGCAGCATGGATCAGT	30	1.15385
GTAATTCAACTAAACCTTGC	30	1.15385
ATGGCAATTCAACATGCAAT	30	1.15385
AGCATTTTTGGTAGGAATTT	30	1.15385
GATAGAGGGTTAGGTGTTGT	30	1.15385
GGTGTTTCAACACCTTCAAA	30	1.15385
CCAGAAGGTGACTTTCAGCA	30	1.15385
CCTTGCTGAAAGTCACCTTC	30	1.15385
CCGGGCTCGGGCCCTTCTTC	30	1.15385
GGAAATCAAACTTCAATGGT	30	1.15385
GAGCTTCTGCCAGAGAAGAT	30	1.15385
TTTTTCTCCAAGTGCACTAG	30	1.15385
TGATGCTTGAAGTTGTGAGC	30	1.15385
TGCCTCGGTCTATTTCTTTT	30	1.15385
GACATCATCAAGGGGAAGGT	30	1.15385
ATTAAACTCCCCAGCAGAGC	30	1.15385
GGATAAAGGATTTGATGGAG	30	1.15385
TACTCAGAGCATACGCCATC	30	1.15385
AGACAAGGTGCCATGTGATA	30	1.15385
ATTCTGAAAACAACCCATGA	30	1.15385
ATAAAACTTTTATGGCCAAG	30	1.15385
GTCTTTTACCTATTTCCATT	30	1.15385
CTGTAATGGAAATTGGAGTT	30	1.15385
ACATCTTCAGGAAACACATC	30	1.15385
GATTAGGGTTTATGTATCAG	30	1.15385
GGTTTTGGGACAAGTCAAAC	30	1.15385
CAAAGGTGATGTTTTATCAG	30	1.15385
TTTAAATGTTTCCCCGGATG	30	1.15385
CCTAATTTCGGTCAAAATTT	30	1.15385
GTTGTAGAGGATGACAAAAT	30	1.15385
ATAATTAATTGCAACCACAC	30	1.15385
GTAGTGACCTTAAGAGAGGG	30	1.15385
CCAGATAAGCAATGCTCTGA	30	1.15385
TGAAGCTGAGCATGCTAACA	30	1.15385
ATAGGTTGGAAAGTTTTTCT	30	1.15385
CAAAGAGATCGAATGTTATG	30	1.15385
CGTTTGGATTGAAGAACGCA	30	1.15385
GAACCATTACTGTTGGAATC	30	1.15385
ATTCAAAAGTTGATCGATGA	30	1.15385
AGGTGGTGCAGTGACCGGAA	30	1.15385
TAAGACCACAGTACTCTCAA	30	1.15385
TTTCTTGGTTATGGGTAAGG	30	1.15385
CAATTGCTAAGACAACTCTT	30	1.15385
TGTCAAAATGTTTAGAAGCT	30	1.15385
CCTTCATCTCCTACTTCATC	30	1.15385
GAATTAGAGAGTGCTGAAAT	30	1.15385
GCCGCCTATGCCCTGTTCCA	30	1.15385
GTACAAAAACATCTTCATTG	30	1.15385
GTATCCATTGAAGATGGTGA	30	1.15385
GTAAGTGTATCCATTGGGGT	30	1.15385
TAGCAGGAATACGCTGTTCA	30	1.15385
TGGGCCTCTTACTTCCCTTT	30	1.15385
ATAGCGAATGTTGTGCATAT	30	1.15385
TACGGAGACAGACGGACTCT	30	1.15385
GGGGTATATGCTGACTCACC	30	1.15385
TAAGAGAACGGTTGGTACAG	30	1.15385
ACTATTTTACCCTTGCCTTA	30	1.15385
CACAGCAGGCCATGTTTGAG	30	1.15385
TCATCTTCGGGAGTATACTC	30	1.15385
AAACATGGCAATGAACAAGG	30	1.15385
AGAATAGGTTCCAAGTGAAT	30	1.15385
AGGCGCAACACACAAACCAC	30	1.15385
TGAGTCGGTTTAATCGCTAA	30	1.15385
GATTTGGGCTTGTGAGGCAA	30	1.15385
ACAAGGAAAGAAAAAAGGAC	30	1.15385
CAGAGAAAGAACGAAGTACT	30	1.15385
TCGTGACTCGACGAACTACA	30	1.15385
TTGACTCAGTTGACTTGAAA	30	1.15385
TTGTATCAATTGATGCATTG	30	1.15385
ATACCTAACACCGGGGTCGT	30	1.15385
TGGTTTATAGGTTGTGTATA	30	1.15385
ACCGGCCCGAAAATAAATCG	30	1.15385
ACAGGTTTCCAAAACACGGG	30	1.15385
ACAAACAAGCAAGAAAAGAT	30	1.15385
GCCGAGTGTATCGCCGTGGG	30	1.15385
TTTGCGTCCTGAGATCAAGC	30	1.15385
TCCGGTTCAGGTAGTTCGAG	30	1.15385
CACCAACACCTTAAACAAGA	30	1.15385
CAGAGCTTGGTATGAGAGAC	30	1.15385
TTAATGCATGGATAGACAAA	30	1.15385
TTCTTGATTAACCAGCTCTT	30	1.15385
CAGTAGGAGAGCGCATATGT	30	1.15385
TGCCTCTTCTGCGTTTCACG	30	1.15385
AATAAAGACTCTTAGAGGCA	30	1.15385
GGGCAGATTTGAAGGTATTT	30	1.15385
CCGCGCGAACTGAAGCGTGC	30	1.15385
TGTTATTTTCCCTTTCCTTT	30	1.15385
ATTGGGTTTGTGCCTCCTCA	30	1.15385
TCGTATTTGTGTTGAAGATG	30	1.15385
GGTATTTTCGAGTATTGGTG	30	1.15385
GGGCGATACACCGAGATGAG	30	1.15385
TCGAAGACGGTGACTTAAGA	30	1.15385
ATTGGTTTCATTCCACCTAC	30	1.15385
ATTTGGCAGGTTGTGGACAC	30	1.15385
TGCTAAAACAAGGAGAAATG	30	1.15385
CCAACTCATTTGGACAAGTG	30	1.15385
CTGTTGAGGTATTACCAATT	30	1.15385
GGTTGATGATGTGCAGGTGA	30	1.15385
TAGGAGGAAACTTGATCTCT	30	1.15385
GCTTAGGGACTGTTTTGTTA	30	1.15385
CAAAGATTCATAACTTCTCT	30	1.15385
TGAGTGGAGAAGATGAAGTC	30	1.15385
GTGTAATTGTTGGTAATAGT	30	1.15385
GCTTGGTAGAGGCCTTCTTG	30	1.15385
TTGAGTTTTGTGAGTCCGAA	30	1.15385
ACGTGATGCGATGACTGATT	30	1.15385
GACGTGATGCGATGACTGAT	30	1.15385
GGGTAGGGTATTTGTCCTAG	30	1.15385
AGATCACAAAATGACCCCCT	30	1.15385
TTGAATGGAATTTGGGAGGC	30	1.15385
TCTACTGGAGGCATCAAAAT	30	1.15385
CAAAAGCCATAAACATCAGT	30	1.15385
GGAAGGAAAGAAGCGAAAAT	30	1.15385
TGGAAGGAAAGAAGCGAAAA	30	1.15385
TCTTGCTCAGATGTGTTGAC	30	1.15385
GTTCCCCAAGCAGAATCCCA	30	1.15385
TTTCTTGCTGATATGTTTGA	30	1.15385
TTTGACTTCTGTTTGTATGT	30	1.15385
GGAACCAAATTCGTGCATTA	30	1.15385
GATGACTTCCAGTCTGATTC	30	1.15385
AGAGTACCAATATTCGTACC	30	1.15385
GTGATATGCACACTTCGCAT	30	1.15385
ATAATCAGGGAAGCCACTCT	30	1.15385
TTTCACTTCAGAGGCTCAAA	30	1.15385
ATCTACCAAGCCGAGGAAGA	30	1.15385
GAGGTTTCAGAAGTGATTGT	30	1.15385
AATACTTCGAAACTGTCTAT	30	1.15385
GAATTTGGCCTTTTGGCTAA	30	1.15385
GAAGAAGCCACAGGGGACCA	30	1.15385
TCTCGACAGAAGCCTGCAAC	30	1.15385
GAAGCCTCAGACGGGCCAGT	30	1.15385
AAGATTGTTTCGCAAGCAAC	30	1.15385
AGTGCAGAAAACTGAGGAAG	30	1.15385
TTAATTTCTGAAGGAATGGA	30	1.15385
CTAACTTTCCCTAGTCTGTT	30	1.15385
TTAGAAGCTCTTAATGTGTG	30	1.15385
TCCTTTTGGGTTGTGCTTTC	30	1.15385
TTGACCAAACAGTAGGTAAC	30	1.15385
TCACTGGTAAGATTGCGAGG	30	1.15385
TATAGGGAAGGTTTGTTCTC	30	1.15385
GCATGTCAAAAGTCTAGTCT	30	1.15385
TAGCTTTTGATTGGAAGCAT	30	1.15385
ACTTACTGGAACATAAGGAA	30	1.15385
TTGGTAAGTTTGAAAAACTC	30	1.15385
TCAGCCTGGCATAGGGAAGA	30	1.15385
ATACTTCTTGAATGCTTTGA	30	1.15385
GGATCACAATGAAGTGAATG	30	1.15385
TTTCATCCAAGTGCTAAACT	30	1.15385
TGGAGATTTAGACTTGGGTG	30	1.15385
CCTACATGATGATTTTCAAA	30	1.15385
CCCTTTGAAAATCATCATGT	30	1.15385
CAACTTTCATAAGGCATATG	30	1.15385
TGCTTTTGGCTTTATCTGAC	30	1.15385
AAACTCAAGAGTACCCATTT	30	1.15385
CCGACGAAGAAATGAGGTAC	30	1.15385
CTTGGGGAATGACAACTCTG	30	1.15385
TCATAATTATGTGGACCATT	30	1.15385
ATTGGAAACTGATTTTGACA	30	1.15385
GCATTTAATGCTTGAATTCT	30	1.15385
TCTTCATTCTCTAGCAGAAT	30	1.15385
CGATGCAGGCTTCCTCAAAG	30	1.15385
GTTGCTCAAAAGATTTGATA	30	1.15385
CGAATGTAGAACTGGATTTT	30	1.15385
GGCGACTCTGCTGGGGACTT	30	1.15385
AACGAATGGACCAACTTGGC	30	1.15385
TATCATTGGATACAGCCTAA	30	1.15385
GACATGACGTTCAACAGTGA	30	1.15385
GTTGGTTTTGTCCCACCTGT	30	1.15385
TATTGATGGGCCTCCCACGT	30	1.15385
GGCAAAAGTTTAGGGATTTC	30	1.15385
GTAGGTCAATAGCTTCTTCA	30	1.15385
AAACCTCGAGAGTTCAAAGA	30	1.15385
GTCTGCGCATTTGGATTAAT	30	1.15385
CCAACTTCGGACTGATGAGA	30	1.15385
GAAGGGAGAAGTGAAGAGGT	30	1.15385
GTTAAGAAAGAGGTCAGAAT	30	1.15385
ATGAAAATTGCATCCATCAG	30	1.15385
TGTTGATACAGAACATCAAT	30	1.15385
AATCACTGCTAGAAACCACA	30	1.15385
TCACGTTGGTTTTAACTTAG	30	1.15385
TGTCAGAAACAAGGCAAGAC	30	1.15385
AGTGGTTTTCCACCTTCAGT	30	1.15385
GCTGTGTGCCTTTATTATCT	30	1.15385
GCTCACTAGCCAGCTTAATA	30	1.15385
CTCTCTCTCTCTCTCGCCAT	30	1.15385
TTTTCCCGGTGAGATGGTTC	30	1.15385
TATGAGGCCTTTTGTGGGAT	30	1.15385
TCTGAAGACCAGTCAATCTG	30	1.15385
CCATACCCAGGACATCATGT	30	1.15385
ACATGATGTCCTGGGTATGG	30	1.15385
TGCCTCAGTCAATACCTTTT	30	1.15385
TTCCAGGCACTAGAGGCATA	30	1.15385
AAGATAGGAATACCCCGAGG	30	1.15385
TGACTGCAGTCTGCATAACA	30	1.15385
TCTGACAGAAAGAACCTGTC	30	1.15385
CTGTAACTGGAGAGAGAGTC	30	1.15385
ATTCTCGTAATCGTGTCGGT	30	1.15385
GAGATTCATGAAGGATCCTT	30	1.15385
TATGCATGATTTTGCCTGTG	30	1.15385
TTTCCATTGCTTGGTTATGA	30	1.15385
AGGTATTTTTTCTGCTTAGG	30	1.15385
TCTGAAGATTCTGACGTGCA	30	1.15385
TTCTACTTCAATGCTCAAAG	30	1.15385
ACTTCTACTTCAATGCTCAA	30	1.15385
GCTAGTATCTCAGAACATCG	30	1.15385
TGGAGTACCCGCAATCTGCT	30	1.15385
ACACCTGACACAGAGTCTCA	30	1.15385
AAGGAGTGACTACAAAATAG	30	1.15385
AAGGTTTAAACTGTCATCAA	30	1.15385
GAATGGTTACTGCGGCGGCT	30	1.15385
TATCTAGGGCATCCCTGGAA	30	1.15385
ATTGATGAGACAGTACTTTT	30	1.15385
ATCAATTTTGCCTTCATACT	30	1.15385
CAAAACTAGCAAGGAATGTT	30	1.15385
CCCTTATGCAGTCTGGTTTG	30	1.15385
CGGGTGCCCCGGAGAATTCA	30	1.15385
GTCTGTACTTGCGTAGGCAC	30	1.15385
TGCTCTATTGCCTGTTGGTT	30	1.15385
GGTTCCCCAAATAAGGAACC	30	1.15385
GCTGGGCTGGATGTTGTGTT	30	1.15385
AAGAACGCGGTTTGGAGTTG	30	1.15385
ATAAGACAACTCGACAACAA	30	1.15385
ACAATTATCTGATGACTTCG	30	1.15385
CTTGCTGATAGAAATTTGGC	30	1.15385
GCAGACGTACCCCACGCGCG	30	1.15385
TTTCGATGATGTCAAAACAC	30	1.15385
GGTTTCTGTAGACACACTTC	30	1.15385
CGTAAAAAGACGCAACTCCA	30	1.15385
TTTCTGCGCTAGTTTTTCTG	30	1.15385
TAGAGATAGGATGCTGGATT	30	1.15385
TACAGAGAAACGTGTTCGAA	30	1.15385
AGGGAAGTGCATGAAGGGCT	30	1.15385
AATGAGCAGCACTGGCCTAT	30	1.15385
TATTTGTCTGTGAAACTCAG	30	1.15385
AAAGAAGGAGATTGAATTTC	30	1.15385
GAGGGCCGGTACAATCCTGA	30	1.15385
ACCCACTCCATCTCGCTTCG	30	1.15385
AGGGGGTAAGAAAATAAGAG	30	1.15385
CAAAGTCAAGGTTTGGTATT	30	1.15385
TCATGTCATGAGGTTCTAAA	30	1.15385
CTAAATGGGAGGTTTGGTGA	30	1.15385
TGGGAGGTTTGGTGAAGGAA	30	1.15385
CCTCAGCAGTGTTTTGTAGA	30	1.15385
GTTCACTCTACTCCTCATAT	30	1.15385
GTAAATCAGACAACGATTGC	30	1.15385
AATCGAAAGAGGGGATGATG	30	1.15385
CTTATCTTATAACCTGGGGC	30	1.15385
TGCATAACTTTAGGAAACTT	30	1.15385
CATCCATCAGATATAATTCT	30	1.15385
GGTCCTAGCTTTGTGACTCC	30	1.15385
ACTATGACTTGTTTCAACTA	30	1.15385
CCACGTGTGAGCATAAGGAA	30	1.15385
ATTTCAGCTTTGCAGGCCCA	30	1.15385
TTATCACTATTGTGATTGAG	30	1.15385
TTTGCAATGGATGTTATCTA	30	1.15385
CAATGGGGATACGAAAAGCA	30	1.15385
CTTCACTGTACCAAAAAGGG	30	1.15385
TGATTTGTGGTTATTGTTTC	30	1.15385
CATGTGTAATAGGTCTAATA	30	1.15385
AAGATTCGAGTTGGGAAGAA	30	1.15385
AAACTTCATTTTCTGCTCTG	30	1.15385
ATCCAATAAGCTATACTACA	30	1.15385
ATAGCACCAAGGCCGTGCCA	30	1.15385
ATATAACTGCCCATGGCACA	30	1.15385
AGTCACTCGAGTTTCAGGAG	30	1.15385
CTTCTTCCTCATCAGGATCA	30	1.15385
GGAACTGGGTTCCTTATTAG	30	1.15385
GGGAGATGGAACTCCGCTTG	30	1.15385
AGAGTTAAGAAGAGAACTCC	30	1.15385
AAGAGTTAAGAAGAGAACTC	30	1.15385
ACAAATGTTTAGGCCAGGTT	30	1.15385
GTAGGCACCTTGAACTTATG	30	1.15385
GAAAAGATCTTCTGAATTTC	30	1.15385
GTTTTGCAATTTTGAGGTCA	30	1.15385
AAGGCCTGGTGGGATTTTGG	30	1.15385
TAGGCTAGTTTTAGGTCTGG	30	1.15385
CTTCTAGGAGTGAAGATGGA	30	1.15385
TTCCACGCGCCTGAAGACTG	30	1.15385
GCAGTCTTCAGGCGCGTGGA	30	1.15385
CATATCTTGCTCGACCTAGG	30	1.15385
TTGAAGAAGTCACTTGGAGT	30	1.15385
GGATAGCTTTTGGATAATTT	30	1.15385
CATTTTGTCCTCTCGAATAA	30	1.15385
GTTGAGTATATGATGTATGT	30	1.15385
TGGAGGCCAGCAAAAGACAG	30	1.15385
ACGTAGAAAGGCCCATAGAG	30	1.15385
TCTGAAGAGGAAGCTTCTGA	30	1.15385
GGGAGAATCAGGAGACCCTA	30	1.15385
TCGTATGTAGATAGAGGGAT	30	1.15385
CAACGAATCAGTATAAATCT	30	1.15385
ATTTTGTGGGGAGACCGGTG	30	1.15385
TTGTGGGGAGACCGGTGTGG	30	1.15385
ACGCTGAGAATGCTGGAACC	30	1.15385
TAGGGATTTATTCTGCACTG	30	1.15385
AAACTTTCTCATGGGTATTC	30	1.15385
AAGGAAAAAGAGGGTAATTC	30	1.15385
TCTTTTCCGGTTGCAACAGG	30	1.15385
TTTTCTTTTCCGGTTGCAAC	30	1.15385
GTTGCAACCAGAAAAGAATA	30	1.15385
GAACTACGAGGATATGTTAT	30	1.15385
AAGGAAGTTTCAGCTGTTTG	30	1.15385
AGCGCATTTTTTGCATGTCA	30	1.15385
TGTGAAGCTTGCCTATTTAT	30	1.15385
CAAGCCAAAATCAAGCTAAT	30	1.15385
AAGAATCTGGGCTCTGGCTT	30	1.15385
GGGTCATACCAAGCTGGTGG	30	1.15385
AGCAAGACTGCTAAGACAAG	30	1.15385
AGTCAGAATAGGGGTTGCTT	30	1.15385
TGAGGATGGTGATTGAACGA	30	1.15385
CCAAACCTAGTTTGTGTACA	30	1.15385
CCATGTACACAAACTAGGTT	30	1.15385
GCAAAGGAGATATGTGAAAC	30	1.15385
TACATCAAGTGAAGTGTGTT	30	1.15385
CTCTGCTCTTTCACGTTGTT	30	1.15385
GGAAGAGACGCCATTCAGTA	30	1.15385
TGATATGAGTCTGAGACCAA	30	1.15385
ATTAGGGTTCATGTGTTTTG	30	1.15385
GGATGTTTTGGATTGGTTTT	30	1.15385
ATGCATCATAGGGTCTGTTT	30	1.15385
GCTGTTAGAGGCATGGTTTG	30	1.15385
TGGGGTATAGGAGCAGGCTG	30	1.15385
AAGTTTGCAAAAGTCTTGCT	30	1.15385
CATCCAACTGGGCGGTGCAA	30	1.15385
CCGGCGGCCCTTCTGACATG	30	1.15385
GGCAGCTTGGAGCCAAAAGG	30	1.15385
CACCAACAAAGTGGTCGCTC	30	1.15385
GAAGAAGGCATCCTTCTGGA	30	1.15385
CTCTCTGAAACTCAACAAAT	30	1.15385
CCTGCACGTTACCATTGGTA	30	1.15385
CCCTACCAATGGTAACGTGC	30	1.15385
AAGATTAATCCCACTGATAC	30	1.15385
TGTCACTTCATGGTTAAGGA	30	1.15385
GGTGAGAGAGTAGAGAGGTG	30	1.15385
TATCATGCAAAATGGCCTTA	30	1.15385
TGTGTTTTCTATCTATGGGT	30	1.15385
GGAGAGCCAGTCAGGAGGCA	30	1.15385
AGACATACGGTACAGAGCCA	30	1.15385
AACTTCTTGAGTTGAAGTGG	30	1.15385
GAAGAAAACCAGAGTCAGGA	30	1.15385
AGTGTTGTTTACTCTCATAG	30	1.15385
GATCCAAAGGTTTTCTGATT	30	1.15385
AGTCACCATTGGAGGTGAAG	30	1.15385
CTGTCCTGGATTTCTTATAT	30	1.15385
GGTTCCCGCGCGGAGTACCG	30	1.15385
TCAAAGAAGTACAGTCTGAA	30	1.15385
TGTATCTTTTGAGTTGGTCT	30	1.15385
CAAAGTGTGAATTCCATTCA	30	1.15385
GGTCCATTTAAAGTTAATGG	30	1.15385
GAAGGGTTACATGTTTGGTT	30	1.15385
ACACATAGGTCATTTAAAGA	30	1.15385
CACACATAGGTCATTTAAAG	30	1.15385
ATGATTTTCAAAAAACCAGG	30	1.15385
TGCATGAGAGAACAGGGCAC	30	1.15385
GCGACTCTTCGGGGAAGCAA	30	1.15385
CCACAGCATTGTCCCCCCAG	30	1.15385
TATTATCACAGGTTCATTGA	30	1.15385
GCTGCAGTAGCTGCTTTCTT	30	1.15385
GAAGCAGAAAGGAGCGAAGA	30	1.15385
CCTCAACAATAAGATGATAA	30	1.15385
CCTTTATCATCTTATTGTTG	30	1.15385
TGTAGATAATCAAGAATAGC	30	1.15385
ATGAACTTTCAGCTGTCTTG	30	1.15385
CTTTCATCATTGCATCCATT	30	1.15385
AGTGTATTTTCCATGACAGG	30	1.15385
CTTAGTGTATTTTCCATGAC	30	1.15385
GTGTTGTTGCTAGTAAGCAA	30	1.15385
TAAACAAGATGGAGACACAA	30	1.15385
TTAAACAAGATGGAGACACA	30	1.15385
CCTTCTTTTGAGAAATATAC	30	1.15385
CCTGTATATTTCTCAAAAGA	30	1.15385
CGAGTATCAGATTGATGTTC	30	1.15385
GATTGAATATCCGAAGTCGA	30	1.15385
TTAGGGATTTTGGGGAAATT	30	1.15385
GATACCGATGGATAATGTTC	30	1.15385
GAGACCCCCGACACAGCAAA	30	1.15385
TACACAAAGATCCCTCCTCC	30	1.15385
ATTTGAGTTGGGAGGATTAT	30	1.15385
TAGGGTATGGCTAAGTGTGT	30	1.15385
GATAAGGCGGCCAGAATCAA	30	1.15385
TGTGGGGCGGCATAGGATTT	30	1.15385
GATAAAAGCTACCCTTAGGA	30	1.15385
TGGGGGAGAATAATACTCTC	30	1.15385
TCCAATTGAGTTGGAGCATA	30	1.15385
AAAAGTGGTGACTTTTCAAA	30	1.15385
ACTTTAAGTAAGGAAAAAGG	30	1.15385
AAGGCATTTGTGAGTGGTTT	30	1.15385
TTCTGGATTTGGGTTGGATT	30	1.15385
TTTAAAGGATGCTAAAGCTG	30	1.15385
GATTACCAAATACTCCGAGA	30	1.15385
CTCAGCTGTAAATACATGCG	30	1.15385
ACACTTTGGACGTTTGATTG	30	1.15385
TATGGGGAAGGTTTGTTCTC	30	1.15385
GCAGTGTGGCAAAGCATTCT	30	1.15385
TGTTGTGTTGGGTCTGGAAT	30	1.15385
TCGGGGTAGAAACCTAGTGG	30	1.15385
TCCCACTCAACCATATTAAA	30	1.15385
TGCAAAATCATCACAATCTG	30	1.15385
GTGTTCCCGGGTTGTTCCAA	30	1.15385
GACGTACCCTTGAGTTATAA	30	1.15385
GGATACTTCCCTTTCTGGAA	30	1.15385
GGAAATCTCCTGAGGTACAA	30	1.15385
AGTGGTATAATTTTGGGGTT	30	1.15385
GTAAGCGCCCGAGGGGCAAG	30	1.15385
TGAGTTTCGTAAGTCCGAAT	30	1.15385
TTGATGTTACCCCTGGGGAT	30	1.15385
TGATGTTACCCCTGGGGATT	30	1.15385
TGCCAAAATAGGAGCCTGTT	30	1.15385
TTCTTTTTAGTCGCAACTGG	30	1.15385
AACAATTTGTTTCCTCAGCC	30	1.15385
AGTGCAGTTGGAATCCCTAG	30	1.15385
TGGGGCTTTGGGAGGACCAG	30	1.15385
CTTCTTGCATGTTTGCTTTT	30	1.15385
GATACTTTTGAGGACAAGAC	30	1.15385
CTTCATCGATTCAAAGACAA	30	1.15385
AAAGTGTTTGGGGAGCTTTA	30	1.15385
TGGGCTTGGAAAAGATAAAG	30	1.15385
TGGAGTTCGTCCCCTAGACA	30	1.15385
TGGCAATGTAAGTGCATCTT	30	1.15385
TGATCATGAACATGTCTAAT	30	1.15385
ATTCATGAAAAAGAAAGAGC	30	1.15385
AAATTCAGGAAGCTTGAATT	30	1.15385
TCAGGAAGCTTGAATTTGGC	30	1.15385
GTGTACCTTTGCTTTACAAA	30	1.15385
TGACTATCCCAAACTCCAGA	30	1.15385
TTTCTATTTCATACCTCCTA	30	1.15385
TAAGGATAGAATTGAGATCT	30	1.15385
GGTGAAACTAAAGTACAAAG	30	1.15385
CACCTTCTCCATTGTAATAC	30	1.15385
GCACCTTCTCCATTGTAATA	30	1.15385
AGGCTCATAATGTGAATTTT	30	1.15385
CATAATGTGAATTTTGGGCT	30	1.15385
TGTAAGACTGTACTTCTGCT	30	1.15385
TATGTAACACCAGGGTCGTT	30	1.15385
TTCACACAACACAGGCTCAA	30	1.15385
ACATTAACAACAGCTTCAAC	30	1.15385
TGGTGAAGGTTGGAAGCACA	30	1.15385
AGACAGAGGAGGCCCAAGCT	30	1.15385
CTAAGATGTAGGCAAATGGC	30	1.15385
CAGGTGACGGCCATGCAAAA	30	1.15385
GGAAAGTAGCAGAGAGTGGA	30	1.15385
AGGAAAGTAGCAGAGAGTGG	30	1.15385
GCAAGGAAAGTAGCAGAGAG	30	1.15385
CGCAAAGATCTGCCATTCAA	30	1.15385
AGAGATTCGTCGATCATTAG	30	1.15385
AGGCTCTCCCATGTGAGGAG	30	1.15385
GGATAATAGCCGCCAAAGGT	30	1.15385
CAACTTATCCAGATTCTGAC	30	1.15385
TTGCATATGTCGGCATTAAT	30	1.15385
TATCGACATACTCGACAACT	30	1.15385
ATCAAACGATCTGCACTAGT	30	1.15385
GCAAAACCACCATTACCACG	30	1.15385
AGGGCTCTGCATTGCAAAAA	30	1.15385
GCCCCTGCTTCATGCCTTGA	30	1.15385
CTGGTTTTTGGGTCTAGGGA	30	1.15385
CATCCCTAGACCCAAAAACC	30	1.15385
AAATGGGACATGTTTGGCTC	30	1.15385
CTTTGGGAAGAGAGACTGCG	30	1.15385
GACGCCTTTTGGGCTGAATT	30	1.15385
GAGGAATGATTCCATTATGT	30	1.15385
CGGTGTTTCATTCTTTGTCT	30	1.15385
ACTAGCCTCTTAGAAATCTT	30	1.15385
ACACGTGTGGACACAAGGAA	30	1.15385
ATCATTGGCTCTGGAACAAT	30	1.15385
CGTCCCAGAGGATCTGAAGA	30	1.15385
CCAGATCCTACCACTCCTCC	30	1.15385
GGAGATTGAGAGGAGAAATT	30	1.15385
ATGTAAATCGTTGCCTAGTT	30	1.15385
AGGTGTGAGTTTCATTCAGG	30	1.15385
CAGTTCGCGGCGCGAACGAG	30	1.15385
GTTTCCCAAAAAACGGAGAT	30	1.15385
CTTATTCGGTATGTTCACTA	30	1.15385
GTACATGATCAGCGGTCTTC	30	1.15385
AAAGGGAGAAGAAGAGAAGA	30	1.15385
GTTTTTACGCGTATGATATT	30	1.15385
TCTTACTGTTTATGGTGACT	30	1.15385
CTGGGGTAGTCGTGAAAAAC	30	1.15385
AGCGGCCGAGGCAACGGAAA	30	1.15385
AACTGCGCTTGACCAACATG	30	1.15385
AAAACAAATTCTAGCTGTGA	30	1.15385
GTTGCGTCTGATTCCACTAT	30	1.15385
AATGAGGTACCTTAATCTGA	30	1.15385
TTTTACGCGTTTGGATTAAT	30	1.15385
GAAACATGAGGTGCATTGAA	30	1.15385
TTCAACAATGGCCTGATCAA	30	1.15385
GAGATTGTTGGAACAAAGTT	30	1.15385
CTCGTATGTTAACATTCTGA	30	1.15385
CGCGCGAACTGGGTTGGGGG	30	1.15385
AGAATCTGGATCCCCTTTAA	30	1.15385
TTTCTTACACAGCTCCCTAT	30	1.15385
TACCAAGCTGGCAGAGACTT	30	1.15385
TTTCTTGTTTATGGCATGGA	30	1.15385
CTTTTTTCTTGTTTATGGCA	30	1.15385
ATATTTCCCTTTCTCTCTTT	30	1.15385
GGTGTTTTCCGATGAGATTC	30	1.15385
GGTGAATTGGAGGTTTTTGA	30	1.15385
CTTTCGAAATTAGGGTTCAT	30	1.15385
GAAAGAAAGAAGGAAAAGGG	30	1.15385
GCATAGGAGAGGAAAAGGCA	30	1.15385
ATGTGAGATAGTATTGAAGG	30	1.15385
GTTGTGTTCCGAGTATCAGG	30	1.15385
CATGGCAATTTTGCTTGTGA	30	1.15385
AAAACAAGTAGGAGCTAGGC	30	1.15385
TAGGAGCTAGGCTGGGAATT	30	1.15385
GGTTTTAGGCTAGTTTTCTA	30	1.15385
TTCTAAGGTGACATGATGTT	30	1.15385
AGATAAACATCAAGACCCCA	30	1.15385
GGTTGAGTGTGTTTTTTATG	30	1.15385
AGGAGCAATTAAGAGAAAAG	30	1.15385
CTTTTCTCTTAATTGCTCCT	30	1.15385
GAGCAATTAAGAGAAAAGTG	30	1.15385
GTTCAAGATCCCCTTAGTTT	30	1.15385
TCACCAGAAGAATTTCCAGG	30	1.15385
TCCAGTTCCTCTTCACTCGA	30	1.15385
GCCCTCGAGTGAAGAGGAAC	30	1.15385
CCTTCGAAGGCAGATACCCT	30	1.15385
CCAAGGGTATCTGCCTTCGA	30	1.15385
TGTGTTTTGGAAGTGAGAAA	30	1.15385
AAGAAGTAGAAAAAAGGGAA	30	1.15385
CTGCAAGTTGTGGTGATGAG	30	1.15385
TGAGTACCTTGCTCACCAAT	30	1.15385
TTTGATTGATGAGAAGCGTC	30	1.15385
GTGTGGCGAGGAAGAATATA	30	1.15385
GTATCCCTAATGCCAATCCT	30	1.15385
CATTTTGGATATCAACCGAG	30	1.15385
CACTCGGTTGATATCCAAAA	30	1.15385
TTACTGACATGGTAAACACG	30	1.15385
TTCGCAAGAGAACCAGGCTC	30	1.15385
CATTCAGTATGTCACGCAGA	30	1.15385
ATTGGTATAAGCAACACCAC	30	1.15385
TATCAAAGCAGGAAAGATTT	30	1.15385
TTACCTACTGGATTCGAACG	30	1.15385
ACACCACGTTCGAATCCAGT	30	1.15385
AACAGTATCTCAACACACAA	30	1.15385
GTTTAACAAGTTCACTGACA	30	1.15385
AAGCATTTACTGGTAGGGGT	30	1.15385
TGGTATTTCAAGGTGGCTAT	30	1.15385
TTGAAAAGACTTGACTTGCT	30	1.15385
CGCTCAGATGAATGCCCAGA	30	1.15385
CATCTGGGCATTCATCTGAG	30	1.15385
GCCAGAGTTTGTGCCTATTG	30	1.15385
TCCTCAATAGGCACAAACTC	30	1.15385
GGTTAAACACATTACCCATT	30	1.15385
TCTATCACAACTTAAGAAGT	30	1.15385
TTACTAAGGCAGCTTTCACA	30	1.15385
CAAACACGATAGCAAATAAT	30	1.15385
GAAAGAAAGAAGAAGCTCGA	30	1.15385
AGAAAAGAAAAGAGGAAAGC	30	1.15385
TGAAACATAGGCTATTGGGT	30	1.15385
TTGATCATGAGGTGGTTTGA	30	1.15385
GGTGAAATTATAGGTCCATA	30	1.15385
TTGCAAAGCAAGTGTGTGAT	30	1.15385
GTGGCTTAAATTTGAAGAAA	30	1.15385
CCTTACTATGCTCAGGAAAA	30	1.15385
CTGAAACATCAGCCATAGGT	30	1.15385
ATAATGAAACAATCATGGCA	30	1.15385
TTTCTTTGTCTTCCATTGGT	30	1.15385
AGATCCAGCTTCGCTTTGTA	30	1.15385
CAATAGGATCTGTGATGGTA	30	1.15385
TGTTGCACAGATCATTCACC	30	1.15385
TTGAGAGTCACACCTGTGAC	30	1.15385
AACTGCACCTGACCAACATG	30	1.15385
TCACCGTAATGCGTTAATGA	30	1.15385
CTATCAAGCAGAAGCTCAGA	30	1.15385
GGTATGAGGTGCTTGGAACG	30	1.15385
CCGAACCATAGAAGAGAGAA	30	1.15385
TCTTACCTCTTACATCTTCA	30	1.15385
GTGTTGTTTGGATTGGGTTT	30	1.15385
AACAACCCGCCAATATTTAA	30	1.15385
ATAAAGGCAACACACCACAA	30	1.15385
CCTTCACACATGCACCTTTA	30	1.15385
TGAGCTATTAGGGTCGAACG	30	1.15385
CGTCACTCAGAAGGCCATCA	30	1.15385
TCTAAGAGTCCGGGGCCGGA	30	1.15385
CTTCATGTAAATCACCATGA	30	1.15385
GGTGATTTGGAGGTTTTTGT	30	1.15385
TTGGAACATGACATATATGA	30	1.15385
TTTGGATGGTCTAAATGATA	30	1.15385
ATTTTGGTGGTATGGACTTT	30	1.15385
CTCAAACCACTTGATATCTT	30	1.15385
GTTAGAACTGCTTGAACTTG	30	1.15385
CACATTATCACATGTTCTGG	30	1.15385
TTCCATTGTGATACTGAAGT	30	1.15385
TAAAACCTTGACTTTCTCTT	30	1.15385
TTACCCGAGAAAGAGACTTG	30	1.15385
GTGGGGATTACCAAGGAGAG	30	1.15385
AGGTGAGAAGTACTTGGACG	30	1.15385
GTGTTTTGCTACACGTTAAC	30	1.15385
CGATGAAGAGGCGGATCGAG	30	1.15385
CTCTGGATAAATGGTGACTC	30	1.15385
CAGTGACATATAGGATAGAG	30	1.15385
CACTCTATCCTATATGTCAC	30	1.15385
CTTAGTTTTGAAGAAAAGAG	30	1.15385
AAAACCCTTTGTGACTCCAA	30	1.15385
TCCCCTGATCAAGCAGCTCT	30	1.15385
GTTAATATTTCCCAGTCGAG	30	1.15385
GCGCTGCAAAGTGAGGTTTT	30	1.15385
GGTTTACTTTGCATTAATTG	30	1.15385
GTTTGAAAGGTGAAAGAGAA	30	1.15385
AGTATGTATGTTGGTATGTG	30	1.15385
TATGTATGTTGGTATGTGAG	30	1.15385
CGTTCCTCCTGTTACTACTA	30	1.15385
GGGTTCAGAGGAAAATGTGA	30	1.15385
TATTCTCCTCTTCAAGGATT	30	1.15385
GTCCAAACAGTAGTCAAGAC	30	1.15385
TGGAGATTTAGAGGTGTGGT	30	1.15385
AGAATTTGGTGTTTGGGGTA	30	1.15385
TAAGGGCTTTTGGATGAGGT	30	1.15385
TTTGAGAGTGTTTAAGGAAT	30	1.15385
ACATAAGGTTCATTGGGCTG	30	1.15385
GTGATCTAATGGTTTCTGAT	30	1.15385
ATCTACTCATAGATGAAGCT	30	1.15385
TCATCAGATAATCGTTACTG	30	1.15385
AGTTATGCCCAGGGGCACCT	30	1.15385
GAGGACAATTCAGTCATTAG	30	1.15385
GGTGGAAAACCCCCCTGGCT	30	1.15385
TGGTGGAAAACCCCCCTGGC	30	1.15385
GAAGAAGGATCGATGACCTT	30	1.15385
GCATTTCTTTCAAGATAGCT	30	1.15385
TCGACCATTCCCTCCTCAAC	30	1.15385
GGGGATAAACCTGTTGAGGA	30	1.15385
TGGGGATAAACCTGTTGAGG	30	1.15385
TTATGCTGTTTGGGGTAGAA	30	1.15385
TGAACTGTAGCCTCGGCGGA	30	1.15385
AATCAGAATTCTGCACAGCA	30	1.15385
TCATTGGATAGCTGGAACAA	30	1.15385
GGGTCAAAATGGAGACTGAG	30	1.15385
AGATTCGTCAAAAATCGATA	30	1.15385
ATTTTGTATCCGGGTTACCG	30	1.15385
TACCCATTCCAAGAAATCAA	30	1.15385
ACAAGTTCCAGTACACTACA	30	1.15385
AGGAAGAAGGAAGGAGAAAG	30	1.15385
AGTGATGAAGATGAACCAGA	30	1.15385
GCCAGGAACCACATGGGTGG	30	1.15385
TTTGCAGGCCAGGAACCACA	30	1.15385
TTTTATGCAGAAAGCTTATG	30	1.15385
ATCCAAATCCAGCCTTGTCC	30	1.15385
CAGTTCTCAATAGCAACAAT	30	1.15385
AAGAAGGTGATTCGAGAAGA	30	1.15385
AGGAAATTGAGAGCAACTCA	30	1.15385
TTAAGGTTTTAGGCTTCTAA	30	1.15385
GTTTAGGGGTATGGGAATCA	30	1.15385
GCTGAAGCAAGGGAGCATGT	30	1.15385
CCTTTTGGTTTCTTGAACGA	30	1.15385
TCAAATCATTTTGCCGCGTT	30	1.15385
GGTAGAAGCTTCTTGTGCTT	30	1.15385
TTTTGCCTGAGTCACCCTTT	30	1.15385
TCTTATCCATACATCGGAGT	30	1.15385
GCTAGGGTAGTCGAAATCAA	30	1.15385
AAAATCTCTTAGAAAGGGGG	30	1.15385
AACAAGTTTGCATAAAATGC	30	1.15385
TGATGATTGGATGATTGAAT	30	1.15385
TTTGTTGATTGATATTGAGG	30	1.15385
TTCACATCCAAATTTCTGAT	30	1.15385
ATCCGGGTTGAGGTCCAACC	30	1.15385
TTCAGCGTCTGAAGAGGTTT	30	1.15385
ATCAAACCACACGACCTAAA	30	1.15385
TAACCATGATGACTTCGCTG	30	1.15385
CAAATTTGGGGTATTACACT	30	1.15385
AGATCTCAATAGAATGACTC	30	1.15385
TCTCAATAGAATGACTCTGG	30	1.15385
AAGACACCTCCTTTGGAAAT	30	1.15385
ATATACAACTTTCATGTTGG	30	1.15385
ATGAGTTTCGAAGTTTGGGA	30	1.15385
GGAAAGGATCGAGAGGCTTG	30	1.15385
TTGGGAGTGGTAAATGGTGA	30	1.15385
TGGGAGTGGTAAATGGTGAT	30	1.15385
AATGTTAAGTGAGATTCTCT	30	1.15385
GGAACTGGGTTCCATAACTG	30	1.15385
AGCAAGGTTTTGGTCTTTTG	30	1.15385
TACTCGCATTTTCTTTTGTT	30	1.15385
CAATTACTGCCCCAATTCCA	30	1.15385
ATCTACAGAAATTGTTTGAG	30	1.15385
GGAACTGGCTTAGCTGGTGC	30	1.15385
CAAAGCTAGAATCCGGAGTT	30	1.15385
TTCTCTGGAATGGGAGTATG	30	1.15385
CAAAGGTGGTCCCTTGAACA	30	1.15385
CTTGACTGGAAGATTCTGCA	30	1.15385
AGTTATCTCACTTGTCTAAC	30	1.15385
AGTATCTTAACAATTCCGCT	30	1.15385
AAGGGTGACTTTGAGTTTTA	30	1.15385
TGGCTAGTACCTCCATGAAG	30	1.15385
GAAAGGACCAAGCAGTGAAA	30	1.15385
AAAACAAGAGTATCCTGAAG	30	1.15385
GAAACACTGCATAAACCTAA	30	1.15385
GACGAATGAAGTGGGATCTT	30	1.15385
TCTGATAGATGTAACACCGG	30	1.15385
GAGGCCTTAGGAATGATTGC	30	1.15385
ATCCGGAAGGCGCTCAGAAG	30	1.15385
GTTTGCGAACAAAAGGATAT	30	1.15385
AGCTGCAGAATCTCACCCAA	30	1.15385
CCTCAAGAGTTTATGGGTTC	30	1.15385
CACCGGTTATCAGAGTAACT	30	1.15385
ATTTCGACATGGGAAGAAAA	30	1.15385
ATGTTGTCGTCATAGTTTAG	30	1.15385
ACCTTTACCTCGGGCATTCA	30	1.15385
GAAGATGAAGATGAGGATGG	30	1.15385
AGTGGGCAAAGCTCTATGCC	30	1.15385
GTTCCTCTCATCGGTACGAA	30	1.15385
CTCTGATAATGATTCCACTA	30	1.15385
CGGGTTCTTTGTAATATTGA	30	1.15385
TAAACCACTTGTACAACAAT	30	1.15385
TATTCGGATTCAACCTCAAA	30	1.15385
ACTCTGTAGGGGAATCAATC	30	1.15385
ATTGATGGTGCTACAATTCT	30	1.15385
CTTGTTGAGTGATACGCGTA	30	1.15385
AATAGTGACTGAACGTGAAA	30	1.15385
GTTACTCCGATAACTGGTAT	30	1.15385
TTCCATACGTTGGATCCCTC	30	1.15385
GGTATCTAGTTCCCGTTAGT	30	1.15385
TGTGTTCTTTTGGGTTTTTG	30	1.15385
TTCAAGTTCATACCAGTCAG	30	1.15385
TGATAACCCTGGCGATCTGG	30	1.15385
ATTGAGCCGACAGCGTCTAA	30	1.15385
TGGAGGTGAGGCAGATGGAT	30	1.15385
GGAAGTTTTGTTCAATTCAA	30	1.15385
ATACGCGTATGATACGCATA	30	1.15385
TCTCTAGACCAATGGGTTAG	30	1.15385
CATATTGAGCTCTTGAGGTT	30	1.15385
TTGAAGGGATGTGAAAGTTG	30	1.15385
TTTTCCGATTGATTGTGTGT	30	1.15385
GGTTATACACCTCCTATTGA	30	1.15385
TTGATTGGCCCAAGCAAAAA	30	1.15385
TGCAGCTCTAGACAAGATTT	30	1.15385
TTGGTGATTTGGAGAGAGGA	30	1.15385
CCTGGATAACCCCCATGGTG	30	1.15385
TCAACAACATCAATCTACAA	30	1.15385
TAATTTGTTTATCCCCAGCC	30	1.15385
GGCCTCGCTGTACAGGTCTT	30	1.15385
CCTCGCTGTACAGGTCTTTG	30	1.15385
CCCCAAAGACCTGTACAGCG	30	1.15385
GGCTGAAAACAAAAGGATAA	30	1.15385
TCTAGATTATGGGTTCGTGT	30	1.15385
ATCTAGATTATGGGTTCGTG	30	1.15385
GACGTCACACTACTGGTGAA	30	1.15385
GAAATCTCCTATAGAGCCAG	30	1.15385
GTGAGGCTTTAGGAAAGGTT	30	1.15385
CATTGATCATTTCACCCGAT	30	1.15385
GGTCTTGAACCTTGTGTTTG	30	1.15385
ATAATGACAAAACCTTGCCC	30	1.15385
TGTCATATAGGTTAAATGGA	30	1.15385
ATGTCATATAGGTTAAATGG	30	1.15385
ATGAAGGTGAAAAAGAGATT	30	1.15385
TGAGTTAAGGTGAGGGAGTT	30	1.15385
AGAAAATAATCGACTCTTCT	30	1.15385
ATCCAAAAGTTGATTAGTGA	30	1.15385
GGAACAGATTCAAGCAGACA	30	1.15385
AAGCGAGCCTCTCTTTTCTG	30	1.15385
AAAAATGAAGCAAAAGGTTG	30	1.15385
TCTATCCAGAGCCTCTCAGT	30	1.15385
AAGGAAAAAGAAGAAGGAGA	30	1.15385
TTTACGATATTGATTTGTCG	30	1.15385
TGTGGCTCAGTCAAATTTTG	30	1.15385
ACATGTCAAAGAGGTCATTT	30	1.15385
AACATGTCAAAGAGGTCATT	30	1.15385
TTTGTTCCCCCGAATGGTTT	30	1.15385
ACGAAACCAAAACCATTCGG	30	1.15385
ACATATCAAAGCATCCAAAA	30	1.15385
AGGTTGGTGATTTGGGCATA	30	1.15385
GAATATTGCCCAGTCGAGTG	30	1.15385
TAAGACAATTGATGAAGCTC	30	1.15385
TTGGCTGAGGGATTTGGTCA	30	1.15385
TGGAAATGAACAAGGTAAGG	30	1.15385
CTTCATCCAGTTGTTTGATT	30	1.15385
AATGCTGCCATGGAAGAAGA	30	1.15385
AAAGAAGAGGAAAAGGCACA	30	1.15385
AGTGCACGAAACTCCGTGTC	30	1.15385
AGAAAGACCTTGAGTAGAGT	30	1.15385
AAAAGGGTCAAGCTTTTGTG	30	1.15385
CGATGCGAATTTCATTCTAG	30	1.15385
CCTCTTACACCGACCACTTG	30	1.15385
ATGAAGGAGGTTTATTTATG	30	1.15385
ACAAGAGAAAATAATGGAAC	30	1.15385
TCCTTTCTTCCCTACCAAAG	30	1.15385
TTCTGTAGTAAGCCTTGATA	30	1.15385
CAAGGCTTACTACAGAAAAA	30	1.15385
TAAGATAAAGGAAACTCCGC	30	1.15385
TCTGAGAATACCGAAGTGAG	30	1.15385
CTTAGGGGTAGATTTGAAGC	30	1.15385
AACAGGTCAGAGGTTTCCTA	30	1.15385
GTTGGATTAGCTTTTGCACG	30	1.15385
GTACATCTAGGTATCAGTTT	30	1.15385
CATGGTTAGGCACATAAGTC	30	1.15385
GTGACAAAGCTGTTTAAATT	30	1.15385
AAAGCCATCCCTTGGAGTTA	30	1.15385
AGGGACTATAATCTTTCGTA	30	1.15385
TCGGGGGTTGGTTATGTAGA	30	1.15385
TGATTGGTTGATTAAGTCAA	30	1.15385
TTGGTTGATTAAGTCAATGG	30	1.15385
TGAAGAGGAGGTCGATTTCT	30	1.15385
TTGCTTCACTTTCACCATTT	30	1.15385
TGCTTCACTTTCACCATTTA	30	1.15385
AAAATAGGCATGATAAGGTG	30	1.15385
CGGATCATCACCTGAACAAG	30	1.15385
CGTACGAGCCTTATTTGCAG	30	1.15385
CACTGTTCTTGAGGAGTCGA	30	1.15385
GACACAACATCGGGATTATC	30	1.15385
GTTTTGGTTCGTAAGTTTCG	30	1.15385
AAAAATATGCCAGGTTACTG	30	1.15385
ATCGTTCAAGGTTTATCCAA	30	1.15385
TATTTTGAGTCTGAATCCAT	30	1.15385
CATCAGAGCAGTGATCTTTC	30	1.15385
ACGTTTAAAGGATGTATCAG	30	1.15385
ATAGGTCATAGTCCTTTTTT	30	1.15385
ATTTGAAAATCAACAGGGCA	30	1.15385
TTCCAATGAGGAAAATCTCA	30	1.15385
ACATGCAAAATGTGTTCTTA	30	1.15385
CGCTGAGCGAAGCATGAAGT	30	1.15385
ATTAAGTCGGTAAGCTGTTT	30	1.15385
TGAGCCGGTTCTGAGAATGA	30	1.15385
TGAGATTTCGGATGTACCAC	30	1.15385
AAGGCAATAAACGGTTCAAA	30	1.15385
TCTAATTGAAACAGAGGTTT	30	1.15385
CTCTAATTGAAACAGAGGTT	30	1.15385
AGGGGATGTGTATTATACCT	30	1.15385
TAACAACTGAGCATAAGACA	30	1.15385
CATTAATGTTGACATATGCA	30	1.15385
GGAACCAAAATCTTACCGAC	30	1.15385
TGGCTGAAGTCTTTGGAAAA	30	1.15385
GGAGATTTCTTTTCAGGCAC	30	1.15385
ACATGGTCTCACTTCCTAGT	30	1.15385
AAGAAAGTCAGAGGTTTCTT	30	1.15385
TAGAACCGTGGCTTTCTGTG	30	1.15385
GATCAAACTCAAAAGATCCA	30	1.15385
TCATAGAACATTTCTCATGT	30	1.15385
GAGTCGACTCAAGGCTGTGT	30	1.15385
ACTTAAAAGAAGAGTTGTAG	30	1.15385
GATATGAAGTGGGGTCTTAG	30	1.15385
TTCTGGCCTATGGTCCCCTT	30	1.15385
GAAGACTTCAATGTTGGGCG	30	1.15385
GGCCGAGTATTCTCCAGCAA	30	1.15385
GATTTGAGGTATTTTGGGAG	30	1.15385
CTTTGCAAAGGAATTCTTGG	30	1.15385
GGGAAAAAGATGACTTCGCT	30	1.15385
GTATCTGAAGACTCTGCAGG	30	1.15385
AAGTGTAAAGTGTTAAGCGT	30	1.15385
GAATAAATGAATCAAGCAGA	30	1.15385
TATCGGTGTGAGAGTATTGT	30	1.15385
GTTTCATTGATGATTCATGT	30	1.15385
ATTTCAGTCAATCAGCTAGA	30	1.15385
TGATTGACTGAAATTTCTTG	30	1.15385
TGTGCTCCGCCAAAGCACAA	30	1.15385
CATAGAGGCTAGCATAGCCA	30	1.15385
CTCTTGAATGGCTTTGATCT	30	1.15385
CATCCCTCAGAAGAAGAAAG	30	1.15385
GGGGAAGCAAGTCCAGATAG	30	1.15385
TCAACTAAGACGTCAATATG	30	1.15385
AATTGGATTTCTTGTTGAAG	30	1.15385
GACTGTTTTACCCTTGTCTT	30	1.15385
TAGAGAGACAGGGTAAGAAG	30	1.15385
CATGTCTCAGTTGGTATTAG	30	1.15385
CTAACATGTCACATGGGATG	30	1.15385
TGGCTGGTTTGGCAAGGTTT	30	1.15385
AGGGATGGTTGGCAAGGTTT	30	1.15385
AAACAAAGGGAAAATGGGGC	30	1.15385
GAATGGATGAAAGAATGAAT	30	1.15385
TCCTCAAAATCTCACATTTT	30	1.15385
AATTGTGATGGTTTGGAGTG	30	1.15385
ATGAAAATTCTGCCTGGGAT	30	1.15385
TGATTGATGAAAATTCTGCC	30	1.15385
AGCTTCCTTCATCTTGCATC	30	1.15385
CGAGTTCTTCAACAAGGAAC	30	1.15385
AGGCTAGGCTTGTTGGTTAA	30	1.15385
GGGGTTATAGGCCTAAAAGT	30	1.15385
TTTGGCAGATGGAGGCCTTT	30	1.15385
GCAGATGGAGGCCTTTTGGT	30	1.15385
GATGGGCTTGAAATGATGGG	30	1.15385
AAAGTGGATTTATGGTGAGA	30	1.15385
CCTATGTATCTTCAAGATGA	30	1.15385
CTAAGAAAGACGGAAAGGTA	30	1.15385
CCAAGTTTGATTATTGAGAC	30	1.15385
CCTGTCTCAATAATCAAACT	30	1.15385
TTTCGGTAACACATTGAGGG	30	1.15385
ATGAGGTCATGTAAGGCTTG	30	1.15385
GGTCATGTAAGGCTTGAGGT	30	1.15385
TTTAGCATGGCTATGGTTAG	30	1.15385
ACAAAGTTGAAGGAAAAGAT	30	1.15385
AAAACAAGAGAAGAAAGTTG	30	1.15385
TGAGTCTAATATGAGGATCA	30	1.15385
ACATACAGGAACCAACAACA	30	1.15385
GCACGAGACCGCCTTTCTTT	30	1.15385
CAGATCTGGACACGTGGCTG	30	1.15385
GGCGCGCAAGCTGGATTTCG	30	1.15385
TTGTGCTGGGGATAACCAGA	30	1.15385
CATATTCTAAGCACAAGTGA	30	1.15385
TTTCATCATTGCTTCTCAAA	30	1.15385
TGTTGACCAGTTCTCCGGTG	30	1.15385
TGAACGATCCTCTTCATCTC	30	1.15385
CTCACTGACTTAAATGCATG	30	1.15385
GCCAAATGAGGATGTTTGGG	30	1.15385
TCTAAGGGGTAAGGCAATGA	30	1.15385
AGAAATCGTGGAGAAATCAA	30	1.15385
CTATCTGAATGATTGTGGAC	30	1.15385
TCGTCTAGCAGTGTATCAGA	30	1.15385
CGTCTAGCAGTGTATCAGAT	30	1.15385
TTATATCACTGCTATGATTG	30	1.15385
TGGATGAAATTCTACAGTCT	30	1.15385
CTGAGTGAAATTCTGGATCT	30	1.15385
TTTGTGATGTGAAATTGGTT	30	1.15385
TTATGCTGCTCTGGTTACTC	30	1.15385
GCTGCTCTGGTTACTCTGGT	30	1.15385
GGTAGTAGCTTCCTGCGCTT	30	1.15385
GTATGCATTGATAGAGAGGA	30	1.15385
TTGGCAGGCAAATTAAAGCA	30	1.15385
GGGTTGAAGGTACTTGACAA	30	1.15385
CAGATCCCACATGTCATTTC	30	1.15385
TGGAACTTTTCTCATTCGAG	30	1.15385
GAGGTCTGGTTTGAGGGATT	30	1.15385
TTCTAATGCTCCCCTATTTT	30	1.15385
GCACCCGTGTGATCAGGCAT	30	1.15385
TGCACCCGTGTGATCAGGCA	30	1.15385
AAGGACATGCGTCATCGGGA	30	1.15385
TCTCCCAAGGGCGGGAGACT	30	1.15385
AACTTACTTGTCTAGAAACC	30	1.15385
TAAGTTTTCATTCATCAGGT	30	1.15385
ACCAAGCCTTTTTACCCCTT	30	1.15385
TCCAAAGGGGTAAAAAGGCT	30	1.15385
GTGAATCTGAATGATGGTTG	30	1.15385
GGTGAATCTGAATGATGGTT	30	1.15385
ATGATCCTCTAGCTGGTAAA	30	1.15385
AATTTTCGTTGAGCGAAAAG	30	1.15385
AGATGCAGAGTTTCAGAATC	30	1.15385
AGTCCTCAAGAGATCGACAT	30	1.15385
GGGGTGGTAGATAATTCCCA	30	1.15385
TACTGTGATGCTTCACTGTT	30	1.15385
GCTTAATGGGGTCATGATGA	30	1.15385
CGCTTCAACCGGGAGTTCCA	30	1.15385
GTTCCACGAACAGTTCTACA	30	1.15385
AGATCATCTTCTCCTTCTGC	30	1.15385
ATTGGTTTCCTCCAATATGA	30	1.15385
GGTTAATCAAGAAGCTCAAG	30	1.15385
TGATTAACCACTTCTTGACT	30	1.15385
TCCCTCTGAAGATTCTGCAG	30	1.15385
CATGAAGACCCAAGCTGAAT	30	1.15385
CAGAACATGTCGAACACTTA	30	1.15385
AGTCTTTTAGGGTTATCCTT	30	1.15385
AAAAGAATCCAGAGCCCTTC	30	1.15385
TTTCTCCTTCTTTCTTTTTC	30	1.15385
GGAACCGGTTCCCATACTGG	30	1.15385
AAGAAGTTGTTTTGGTGACC	30	1.15385
GGTTCAGAAAAAGTTGTACA	30	1.15385
AGTGTTATATCCCTTTTGAA	30	1.15385
CCGTACAAGCCAAAGATGAA	30	1.15385
CGATGGCCACCAGAATAAAG	30	1.15385
TCCAAAATGGCGTTCACATC	30	1.15385
CCCTCTGTATTTCTCAAAAT	30	1.15385
TGCAGTGCGGTGGCTATCCA	30	1.15385
ACTCGGCTGGAGAATTCGGC	30	1.15385
TCCCTTTTGAAAACTCTGCA	30	1.15385
AAATGTGGTGACTCCACTGG	30	1.15385
AATTGAACGGTTTGTTCAAT	30	1.15385
CTATTTGGAATGTTGATGTG	30	1.15385
TCGATTTATTGGTCCATATC	30	1.15385
TTTTCCACAATCCCGATTCA	30	1.15385
TGGAGAGAACAAGACGGCTA	30	1.15385
GTGGAGAGAACAAGACGGCT	30	1.15385
TTGAGTGAATTGTCTGTATT	30	1.15385
GCAACGTGAAGGGTTTTTGC	30	1.15385
TTGACTTAGGGTTTGTGGAG	30	1.15385
AGTGTGGTTGAGGGCTGTTG	30	1.15385
TTTGGTGGTTCAGATTGAAT	30	1.15385
CGTTCAATGTGAAAACTATG	30	1.15385
TCTGGAATGTTTTGTTGTGA	30	1.15385
TTTCTATGACAGTCTGAGTT	30	1.15385
GAGGACTAATGAAGGTTTTA	30	1.15385
AACCATCAATGGTTAATGCT	30	1.15385
ATTTTAGGGGCATGTCATGT	30	1.15385
TAGGTGAGGAATAGCAAGTT	30	1.15385
TGATGTAGCTATTACATGCT	30	1.15385
GTTGATGAGTTCAGGAGTTT	30	1.15385
GGCTGAAACTCACGAGAAAC	30	1.15385
ATTGTTATGGTGTTTAGCTA	30	1.15385
ACACTCACCGTAATTCCTTT	30	1.15385
GATGGATGTATCCTATTGAA	30	1.15385
TATGCATGATTTTTCCTGAG	30	1.15385
TGGGATTGTATGATCGTATA	30	1.15385
GGGATTGTATGATCGTATAT	30	1.15385
TGCAATCGATTTGAGGCATA	30	1.15385
CTTCGAAGATGGGTTTAGGG	30	1.15385
AGTTTGATTGCCAAATGATA	30	1.15385
AAGCTTGAAGATTTGTGATC	30	1.15385
CTACCAGTATAACACAGATC	30	1.15385
CCAAATACCTTCCATATGCT	30	1.15385
CCAAGCATATGGAAGGTATT	30	1.15385
GGCTTAGATGTGGAGCCTTT	30	1.15385
AAAGACAAAGGAAGAGCAAA	30	1.15385
GGAAGGGCCAAGCTTTTGTT	30	1.15385
GAAGGGCCAAGCTTTTGTTT	30	1.15385
ATACCTCAAGCGAATAGCTC	30	1.15385
TTTCTCAGCTCATCTAATTT	30	1.15385
GGAGAAGGCATTTATGCAGA	30	1.15385
GTATGTTCAGTCAGTATAAG	30	1.15385
TTCTGCATATCATCCGTAGA	30	1.15385
AACTAGGGATCAATTCCGAA	30	1.15385
TTGATGAATGATTATCGTTG	30	1.15385
TGATGAATGATTATCGTTGT	30	1.15385
TTGGGTTAGTGAAGGTTGTC	30	1.15385
CTTGAGCACTACCCTGCCCC	30	1.15385
TATTCCGTGTTTAAGTGGAA	30	1.15385
AAGCTAGTTCAGGGAGTGCA	30	1.15385
GAAAGAGAGATATGCTTGGA	30	1.15385
TACCGTTACCGACACACTGC	30	1.15385
CAATCTGAATGAAAGTAAGA	30	1.15385
TTCTGTATCCATTCTCAACC	30	1.15385
AAATGGTTACTTAAATGAGG	30	1.15385
AGTTGAGCCCAAGAATGTCA	30	1.15385
TGGAAGATGTAGTTCTGATG	30	1.15385
AAAGGAATTCAACACTGAAT	30	1.15385
CCCAAGGGAAGAAAATCAAT	30	1.15385
TACATGGAGGGATCTTGTTG	30	1.15385
CCTATGAGATCCATACCAGA	30	1.15385
AAGAAGTTGTTCTAGTGGTC	30	1.15385
AACTTCAGAGGTAGAGGTAG	30	1.15385
TATGATCATATATGGGTAGA	30	1.15385
GAAAAGGTCAAGCTTTTATT	30	1.15385
TTGTGTATGACATTGGTATC	30	1.15385
CTCATGCCTACATATCTCCA	30	1.15385
AGAACTGGGTGCAAACCCGA	30	1.15385
ATATTCACGTGGAATCCTTT	30	1.15385
TTGTAACGTAGCCTGGTTCA	30	1.15385
GGTTTCTGTAGAAACATTTC	30	1.15385
GGATCTTACTGACCTTGGGT	30	1.15385
CAGGTTAATCACAAAAATAG	30	1.15385
AAGACAATTCAAGTTCATCT	30	1.15385
AAAATCCCGCCGCGACAATT	30	1.15385
AATAACAAGGGTGCTATACT	30	1.15385
ACTCGATGATCTCGTGGAGG	30	1.15385
AGGGGTAACATTAACAAAGA	30	1.15385
GTTCAAAGGCTAATGCAAGC	30	1.15385
ATCTTCAACAATCCAACGGC	30	1.15385
TGAAGAGGTGATGATAATGG	30	1.15385
AGGCATGGCCTCAGGATAAC	30	1.15385
GAAGGGTGAACTCGGCTGGG	30	1.15385
GCTTTTGGCTTGAAGAATGC	30	1.15385
TTGTCCTTTGCATGATGGCT	30	1.15385
TGTCCTTTGCATGATGGCTC	30	1.15385
GTCCTTTGCATGATGGCTCG	30	1.15385
GGGGTACATACCAACTGCTA	30	1.15385
TGAAGGCATTGAGCTACCAC	30	1.15385
GTGGTAGCTCAATGCCTTCA	30	1.15385
AGGCATTGAGCTACCACAGG	30	1.15385
CGCGTAGCATCGTTTCGATT	30	1.15385
GATCTGATCAGATGATGTTC	30	1.15385
AACAGAAGCTCAGAAGAACG	30	1.15385
ATCTTCCCTTACAATGAACA	30	1.15385
TCGCATACATGCATAAGCAG	30	1.15385
TCTGAGGTGAAGAAGGAAAT	30	1.15385
TTTCTGTAGGAACACTTTTT	30	1.15385
TAGTTTTCCTATAGTTCACA	30	1.15385
TCTGATAGATGTAACACTGA	30	1.15385
GATGCGTCGTTGTTGGGTTT	30	1.15385
AGGTCAAGAATTTCAACTTC	30	1.15385
AAGCTCAAGAGTATCCCGAA	30	1.15385
CGTACGCCAGGTAGTATCTG	30	1.15385
TCTTCATGGACATGTCAGGT	30	1.15385
CTTCATGGACATGTCAGGTC	30	1.15385
GGTCACTTCACCAACGCAGT	30	1.15385
TCACTTCACCAACGCAGTAG	30	1.15385
GAGCGACATAGCCGGGGAGA	30	1.15385
GCTCTCTCTACTTTATCTGA	30	1.15385
CATTCGGACGAGCAGACTCT	30	1.15385
ATGAGATGAACTGGAGGTTA	30	1.15385
AATGAGATGAACTGGAGGTT	30	1.15385
CAAAACCAAAAGGCGTTAAT	30	1.15385
ATCAAGCATTTACTCAGTAT	30	1.15385
CTGATGTGATGTTCTATTAT	30	1.15385
TGTGAATAGTCATTGATATG	30	1.15385
AACCAGTTTTGTGACTTTTG	30	1.15385
GTAGGTACATTTGGTCTTTT	30	1.15385
CTGTTGTTGTTTGGAAAGGA	30	1.15385
GAGTATAAAGCCTGTATCTT	30	1.15385
AGGGAGAAGTCATAACGTTC	30	1.15385
CATCCCCAGCAGATCGCAGA	30	1.15385
GAAGTTTGTTTTTGTTGTTC	30	1.15385
ACAAATTGGTTGAACAAGTT	30	1.15385
TAGAAGCGCGCAGAGGAAAG	30	1.15385
ATCAACTACAACAGGTTAGG	30	1.15385
TAGGTTGCAGGCAAAGCAGG	30	1.15385
TCGGAAATGCAAGATCTTTA	30	1.15385
TGAGAACAGTAGTGACTTGC	30	1.15385
CCTGATTCATACCAACAAAG	30	1.15385
TGCATAAGTCGAGAATCGTG	30	1.15385
TATTTGTTTCCCATAGATGA	30	1.15385
TGCTTTGTTGAAGAAGTCAC	30	1.15385
GAGGTTTGAGTGGATCATGG	30	1.15385
GTATTTGTAATGCTTCACAA	30	1.15385
AATCGAAGTATCCTTATCTT	30	1.15385
TTAGGGATACCTTCAATCCA	30	1.15385
ACTTGTTCGGATTCAAACAA	30	1.15385
GAAAAGACAAAGAGACAACA	30	1.15385
CTATGATTTTGGCTTCATGG	30	1.15385
TGGTGGCAAAAGGTGCATTT	30	1.15385
GCAAAAGGAGGCCTAAAGGA	30	1.15385
TAATGGTATGACAAGTATCC	30	1.15385
TAACCAAACTCGAAGAATAT	30	1.15385
AAGTCTCAAAGGGGTTGACA	30	1.15385
TGGGGATTTCCTTTCCTAAG	30	1.15385
CAAAATCTCTTGGCGTTAAC	30	1.15385
AGCTAGAGGTTGGGGATGAA	30	1.15385
CTGATTTCACATTTCCATTG	30	1.15385
AATGCAGTTGGAATCCCCAG	30	1.15385
AGCTCAGAGCAGTTATTCAG	30	1.15385
CGGGACGGGCATAAACAAGG	30	1.15385
GAGAAGAACACATCCATATA	30	1.15385
TTTCATGGGAAAAGAGGGCT	30	1.15385
TTTTCCCATGAAACCATGAC	30	1.15385
CAAGGCCTGTCATGGTTTCA	30	1.15385
AGAAATCTCTTGAGGTACGA	30	1.15385
AGATGGACGCTCGTGTTCGA	30	1.15385
TACACTAAGCTCTCGTCATT	30	1.15385
TTGATTCCAACAGCTTTAGA	30	1.15385
TCACCGATCCCATCCGAATA	30	1.15385
GAGCTATTGTGATGGCTGTT	30	1.15385
AATGCACCCACTTTCACTGA	30	1.15385
ACTAAACAGGTTTGGTGTAA	30	1.15385
TCATTGGTAAAATTGCAAGA	30	1.15385
TGAAGTTGAAATACAAAGGG	30	1.15385
CCTTCTACTGCTCTTTCCAC	30	1.15385
CAAGTGGAAGGTGATGGAAA	30	1.15385
ATTTCCATCACCTTCCACTT	30	1.15385
CATTTCCATCACCTTCCACT	30	1.15385
CGTCGAGGATGTTGCTTCAT	30	1.15385
GAACAATCCACCTACGTTTG	30	1.15385
AAAATCAATCATTCCCCAGC	30	1.15385
CGTCCGTCACATTGAGGGTA	30	1.15385
TCGTAAACTTCTTTCATTTC	30	1.15385
GTATGATCAAGGTTTTCTGA	30	1.15385
TGATAAGACACTGCCCTTAA	30	1.15385
TGTATCCCAATGGGAATAAG	30	1.15385
TCTCACTTGAATATGGGACA	30	1.15385
CTCTTTCACACTTTCCTCCA	30	1.15385
AAATAGTTCAGAGGTAGGCT	30	1.15385
AATAGTTCAGAGGTAGGCTT	30	1.15385
ATAGTTCAGAGGTAGGCTTG	30	1.15385
CGAGAACATTGAAGCTGATC	30	1.15385
CTCTCCATATAACCAGACGT	30	1.15385
CATGAGTTGAAAATCCACTG	30	1.15385
TGCATCATGTTCATATTTCT	30	1.15385
AGGGATCAATCCCTAAGACG	30	1.15385
ACTCCATCTCAAAATGAAAC	30	1.15385
CGCTTTATGAGACTCAAAGC	30	1.15385
GTGTTCCAAATGGGGCTAAG	30	1.15385
GACTTGCTGGGAATTTGTAC	30	1.15385
TGCACAAATTCAAGAACCAC	30	1.15385
CCCCTATATTCTTATTCCCT	30	1.15385
ATTTTTCAGGCCATCCCAAT	30	1.15385
TCTTGAAAAATGGCTAGATT	30	1.15385
GTTGTTGCTGGTATAACTGC	30	1.15385
TTCATGTTTTTATCACAGGT	30	1.15385
ACCCACGAAGAGCCTCGTCT	30	1.15385
GACGGGAAACCTGCTCGCGG	30	1.15385
TTTTGAAGTCGGAAAGTGAA	30	1.15385
TACGGCAGCCACGGTGGTTG	30	1.15385
TGAACCATGGTGTGAACAAT	30	1.15385
CAGACAATTCAACCTGCGCT	30	1.15385
ACTGTCTCCATCTGTTTTGG	30	1.15385
CATTCTTCACCTCAGTCCAA	30	1.15385
TGAGTTTCGTCCTCCTACTC	30	1.15385
AACCGACTTCCGACAACAGA	30	1.15385
TGAGCTTTTGTTGATATAGT	30	1.15385
TGGAGGACACTCGGGTCTCA	30	1.15385
CTGATCTGAAACATTCCATC	30	1.15385
GTAGGCTGACAGATTTGCAT	30	1.15385
AGCTGAAACCCCAAGAAATT	30	1.15385
GTGATGGGAGATACGCGTAT	30	1.15385
GTGATAACTGACAGTCTGTT	30	1.15385
TGATAACTGACAGTCTGTTT	30	1.15385
GATAAATGATTGCCCCGGAT	30	1.15385
ATCCTCTTGTAAACTTTCCA	30	1.15385
CTCAAGAAGATTAATTGCAA	30	1.15385
TTCCATGAGCAGTTCTACAT	30	1.15385
TCGAACTATGAGGGCAAAGT	30	1.15385
TTTGAGCCTTTCCATTTTTT	30	1.15385
TTGTTGTGTTGATTATATGC	30	1.15385
TGTTGTGTTGATTATATGCA	30	1.15385
ATCTTGTATGTCATGGGTAG	30	1.15385
TGTCCGAGGAGGCTGATGAT	30	1.15385
ACTTTGACTTTTGAGAAAAG	30	1.15385
TCCATCTCATGTGATTCGTA	30	1.15385
TCCATACGAATCACATGAGA	30	1.15385
ATACAATTGTCCATGACAGA	30	1.15385
TCACACCGAAGAAGAACATT	30	1.15385
GGACGATTTGATATGAAAAT	30	1.15385
ATTTGGTTTTGACACAGTTT	30	1.15385
TGAGAAACTCCAGACCATTG	30	1.15385
TAACAGCTTCTTCTTAACAA	30	1.15385
ATGGAGTTGTGGATATTTTG	30	1.15385
TTCCATCAGCTATGCCGCCT	30	1.15385
AGCAAGCAACAAGGAGTAAT	30	1.15385
GAGCAAGCAACAAGGAGTAA	30	1.15385
ATGGACAGGGAAAGGAAAAC	30	1.15385
CAATCTGGATCTTGGAGAAA	30	1.15385
CCTTGCAAACACATTCTGAA	30	1.15385
CCATTCAGAATGTGTTTGCA	30	1.15385
AAGCTTTAAGTGTGTGTGCA	30	1.15385
TCACTCTCTCCAAGGTGGCT	30	1.15385
TTGCTTCACTCTCTCCAAGG	30	1.15385
GGAATCGAACCGTCTCTTAG	30	1.15385
AGAAGCATTTCATGACAGCA	30	1.15385
AAGAAGCATTTCATGACAGC	30	1.15385
ATGATTTGGTTAAGTCCTAT	30	1.15385
TTGTGGAGAGGGAAGAGAGA	30	1.15385
TTGGTTTGTGATTTGAGCAT	30	1.15385
GTTTGTGATTTGAGCATTGG	30	1.15385
GATGATCTGTGGCAACTCTA	30	1.15385
TCAGAGCAGGTTGGTCCATC	30	1.15385
CTATATTGATGTAGATGTGA	30	1.15385
GTTGTATCGGTGAGTCAGCT	30	1.15385
TTCATTTCGGTAATTTCCCC	30	1.15385
GAGGGATAGAGAAGAAGACC	30	1.15385
GCATCGGCATTCACAGGACG	30	1.15385
AAATCATTATAGTTCACCTC	30	1.15385
GGAGGATCTTGTTAAGCAAA	30	1.15385
CCGGGTTCCAGCTGCCTGAA	30	1.15385
GTCATAATGGATGATTTGGA	30	1.15385
TAAGCCTTAAACACCAACTC	30	1.15385
TGTCCTATAATCGTCCGAGA	30	1.15385
TGCTGTTAGGGTCATTGATT	30	1.15385
GCTGTTAGGGTCATTGATTA	30	1.15385
AGAGTATTAGATCGATGTTG	30	1.15385
TTAGCACCCTCTACATCCAC	30	1.15385
ATTCGAAAATCATGTGATTC	30	1.15385
CCGAAAGTGACACCGAAGTT	30	1.15385
ACCATCGCATTGGAAATCGG	30	1.15385
TTGTAACAAGAAAGGAATGT	30	1.15385
GTAACAAGAAAGGAATGTTG	30	1.15385
AGGGAAGAGAAAGATGGAGA	30	1.15385
TCCTGAGAACCCATCCATGA	30	1.15385
GTCTATGAGACGGTAACGTA	30	1.15385
TAAGCCATACGCGTATGAGA	30	1.15385
CCCTTGGAAGCCTCTGAATG	30	1.15385
TCCTAAATCAAGTAGTATTC	30	1.15385
GGAAACTGCAGGTTTTCGCA	30	1.15385
ATTCCATTCAAGGCTGAAGT	30	1.15385
AGGGAACCACTATAAAATCT	30	1.15385
TTTGTATTGACTTGTGATCC	30	1.15385
TCATGCATACATTTCCTGAG	30	1.15385
AGCTCAATTCCTGTGGAGGA	30	1.15385
GCAACACCACTGGCAAAAGG	30	1.15385
CTTTTCTGCAACGCGTTAAC	30	1.15385
GTTTGAGGTATGCAATTTTG	30	1.15385
AAATGTGAAAAGTGAGGTTT	30	1.15385
AATTTGGTAGCTAGGTTTTT	30	1.15385
ATTTGGTAGCTAGGTTTTTG	30	1.15385
GGTATGTCACTGCATGAAGT	30	1.15385
TACTTTTCCCTTCCTCTTTT	30	1.15385
ACACATCACAAATGTTACCT	30	1.15385
TCCTAGTTTTCTTCAGACTT	30	1.15385
TTCCTAGTTTTCTTCAGACT	30	1.15385
GATTCCTATCAAATTCTCAA	30	1.15385
AGGTTCTTGGCGATCAAGGC	30	1.15385
CCAAGGGGACATGGAACTGT	30	1.15385
GTCACACTTCGACACATCGA	30	1.15385
GCATCTGCCTTGTCATCAGC	30	1.15385
CTATGACCCGTACACAATGG	30	1.15385
GGTTCCTTACTTTCAGGCAA	30	1.15385
CAAAGTTGGATCAAGTATGA	30	1.15385
CTTCATACTTGATCCAACTT	30	1.15385
GCGAACAATTCAATCTTTAG	30	1.15385
GCTTCGAAGATGGGTTTAAG	30	1.15385
TGGAACTTATATGCTTGCTG	30	1.15385
AGTGCCAAATGATATGGTCT	30	1.15385
AGGATCCTTGGTGGAGTCAT	30	1.15385
AAGTGGTTAGAATCATCAAT	30	1.15385
AAGTTCCGATTTCCCCAAGC	30	1.15385
CGGTGGTAGCTAATTCCCGT	30	1.15385
GATAACTTTGGCACCTTTTC	30	1.15385
CTTGACTTGCCAGAAGTCAA	30	1.15385
TTTGTGTCTGTACTTCTCGT	30	1.15385
GCAAGGCTGGCAATGGTAAT	30	1.15385
TGCAAGGCTGGCAATGGTAA	30	1.15385
CTTGAGAATACATAGGCACA	30	1.15385
ATTTTCCCTACAGTCGGTGA	30	1.15385
TTAACCTCTTCTTCAGCTCT	30	1.15385
CAAGTACAAGCGCGAAGAGA	30	1.15385
CATCTCTTCGCGCTTGTACT	30	1.15385
GAACCAATTGAAAGAGGAGA	30	1.15385
AGCGACACCATTGGGGAAAA	30	1.15385
CTGTGTCGGCAATTGGAATA	30	1.15385
TAGCTTGTTCTAGTAGGTCT	30	1.15385
AGTTTCAAATCCAATCCAAA	30	1.15385
TTGAGGGTGGAAAATGGTGA	30	1.15385
TGTATCATTTCATGACAGGT	30	1.15385
ACAACCTCCTTCAACTTGCC	30	1.15385
TGCTTGGTCAAGGTATGATT	30	1.15385
ATGATAATCTACCACAAGAA	30	1.15385
GCCGGATTATTTGGATCATA	30	1.15385
CTGAATCAGTGGAAGACCCC	30	1.15385
CCTGTTATGCATGAATGAAT	30	1.15385
CACCACTACATGTGGCCTCT	30	1.15385
GTAATTCAGGTTGACTTGAT	30	1.15385
TGCTTGAGAGAACAAGGCGT	30	1.15385
ATGTGCCTTGATCAACCAGA	30	1.15385
GATGGCCTTGGTGCTCTCAA	30	1.15385
TTGTTGTGGTATCTACCCTC	30	1.15385
GAAAGAACAGTTAACTTTGA	30	1.15385
GTAGAAACGACAGTGCTCTG	30	1.15385
AGGTTGCTAACACTTTTTGA	30	1.15385
TCTCCCAAAAGGGGATTATT	30	1.15385
CCCTGGGACGTTTACCTCTG	30	1.15385
GCTGGAAAGGAGCTCGTTGA	30	1.15385
AGATAGTGATTGTGCACTCA	30	1.15385
CAACTAAATCAGGAAAAACA	30	1.15385
TGATAAGCGTAGGAAGGATT	30	1.15385
ACCTGCACGTTACCAACAAA	30	1.15385
CTGATGGACGCAGTTTTTAC	30	1.15385
AAAGTGAAAGTTGGGCTGAG	30	1.15385
ATGTGTTAGGCCAGGAAATG	30	1.15385
TCGCTTAGAGTAGACCTATT	30	1.15385
TTCAAAAAGCTAGTGCAAGC	30	1.15385
CATAGTGCATGTGCCGAAGA	30	1.15385
CTGGAAGAAGGACATCGCAG	30	1.15385
ATGCCTACGATAGGGGCATA	30	1.15385
GACAACTATTGAACCAGTAG	30	1.15385
GTACCCGAAACTCTTTAAGA	30	1.15385
CCACCAACTCATAATCGAAG	30	1.15385
GAGTTTAGTCGTTTACCCGT	30	1.15385
CACGTCAAACTTTCACCAGC	30	1.15385
CACCATTTAATATGGTTGAG	30	1.15385
ACCATTTAATATGGTTGAGT	30	1.15385
ATTTAATATGGTTGAGTGGG	30	1.15385
CCTCGGGTTTGTACCACCAT	30	1.15385
AAACCTAGTGAATTGTTGAA	30	1.15385
TACCGTACACGAGTGAAAAT	30	1.15385
ATTTTCACTCGTGTACGGTA	30	1.15385
ACCGTACACGAGTGAAAATG	30	1.15385
AAATCATCCACCAAAAGGCT	30	1.15385
AACATGAAAAAGTTGGGGAA	30	1.15385
GAAGGGAGTTCATCTTCAAG	30	1.15385
TGACAGGAAAACTCCGCTTG	30	1.15385
TCCTAAGTAAAGCCAAGATG	30	1.15385
TGATACTTGAACATGATAGG	30	1.15385
AACGGCCTTCCAGGCACGGG	30	1.15385
TACTCCACCAAGACCCATCA	30	1.15385
CAAGGATTCAAAGATAGTCT	30	1.15385
TGTTAACCGATTAACACCCT	30	1.15385
TGGAAGATGTGGTACTGATG	30	1.15385
TTCTTCAGGTTTCAGCTTTG	30	1.15385
TTTTCAGTAAAATCGATCTG	30	1.15385
AGACGTTTTATCACAATCTT	30	1.15385
CATTGAAGTAGATCCAGACA	30	1.15385
TGATCAGATAAGATGTTTTC	30	1.15385
ATTTTTGGTGACTGGAACAA	30	1.15385
GGTTAGGTGTGGTACAAATG	30	1.15385
TATATTTCCATCAAATCCAG	30	1.15385
AATGAAAGAGTGAACTCGAC	30	1.15385
GAGATTTAGGACTTTATGAG	30	1.15385
TGAGAAATGGGAAGATTACA	30	1.15385
ATGGTGTGCACAAGGTTGGC	30	1.15385
GTGTTTTCCTCCTCTTATCA	30	1.15385
CCATCAAAATCTTTCTTAAC	30	1.15385
ACTTGAAAATATCTTCCCGA	30	1.15385
GGCATTCTACGGAAGTCATC	30	1.15385
GTCAACTCTTTTCCAGTAAT	30	1.15385
AACTCTTTTCCAGTAATCGG	30	1.15385
GTAACCAAGGGTCCATACAG	30	1.15385
TTGATGTTCATCTGGATAAT	30	1.15385
CACATCATTTTTCTCATACA	30	1.15385
AAATTCTAACTCACAACATG	30	1.15385
AACAAATTTATCCACAGAAC	30	1.15385
TTTCACGCGTAAGTGTTATT	30	1.15385
AACCGTCTCAAGTTCAAGAA	30	1.15385
GTTGAGAAGATGTGTTACGG	30	1.15385
CATGAAAGAGTGGATACAAA	30	1.15385
CCTGCAATAGCTGGGAACCC	30	1.15385
TCAGATTCTGGAGAAGATAG	30	1.15385
ATAAGCATGGAAGATGATAC	30	1.15385
TGAGTTCCAAATGACATATA	30	1.15385
AGTTGAGTTGTTGATTTAAG	30	1.15385
ACACTTGGAAAATTCTCCAT	30	1.15385
AGCAGCTTCCAACTCAGTGT	30	1.15385
AAGTTGCTCTTCAAATGAGG	30	1.15385
CCAAGCATAGGGAAGGTATT	30	1.15385
CCAAATACCTTCCCTATGCT	30	1.15385
ACATTCAGATAAAGCTGAAG	30	1.15385
AGGCTCTTTGTCAAAATAAT	30	1.15385
AATTCCATTCCGGAGGAGTG	30	1.15385
ATGTTAAAAACTGCATTGGT	30	1.15385
CTCTTTCCATCTTCCATCTC	30	1.15385
GAAAATAAGTTTGAAGGAAC	30	1.15385
ACATCTTTTAGGTCTTCGAT	30	1.15385
GATGGTGGGAATCCAACACA	30	1.15385
CCACGAGTTCAAGAACCACA	30	1.15385
GGGGAAAGGATATTTCTGCT	30	1.15385
TCCTCTTTTTTTCAAAGCTC	30	1.15385
ACCCGAGCTTTGAAAAAAAG	30	1.15385
TTTTAGAGGATAAGGGCTTT	30	1.15385
TTTCCTAAAGCTTAAAGGCA	30	1.15385
TTGAAGCATGTTTGATGATC	30	1.15385
GGAATATGGAACAAACAGCT	30	1.15385
TATGGAACAAACAGCTTGGA	30	1.15385
CTGCCTGGGTCCTTTAACTT	30	1.15385
ACACTCAAAGCAAGACTCAA	30	1.15385
ATCTGAAGAAGGGACACCGT	30	1.15385
CAGAGACGCGTGGAAAAGCA	30	1.15385
AAAAAGGGTTTTGAAACTGA	30	1.15385
CGGTTCCGAAGACCAGCCGT	30	1.15385
ATTGACAAGATCGAATGAGA	30	1.15385
AGACGGGGAGTTTACTCCAA	30	1.15385
GTTGAGGGTTAGGAACCTAG	30	1.15385
TTGAGGGTTAGGAACCTAGT	30	1.15385
AAACAAGCTTAGCTGGATTG	30	1.15385
TGGTGGCTTTTCCCTCTTTC	30	1.15385
GAGGATGAAGTGCTTGGACG	30	1.15385
AAAAGGTGCAGTGATGTTTA	30	1.15385
GATATGCATGCTCACACACC	30	1.15385
GAATCTCACTGTATCAAGTG	30	1.15385
CATGAAAGGACAAATAGTGG	30	1.15385
GGTGGATGCCTTTGCTGCCA	30	1.15385
ATTCTGCAGGACAGCAAAGT	30	1.15385
AAGCATAATTTGGCAGTGAA	30	1.15385
CAAATACAAACACGAACAAT	30	1.15385
AGGAGTGTAGTGAACAACCG	30	1.15385
ATCACCAACCCCACGGCCAC	30	1.15385
TTATCACATCACCAACCCCA	30	1.15385
CTCATATGATATGATAAAGG	30	1.15385
GGTCTCATATGATATGATAA	30	1.15385
GCATGATCCAGATTGTCAGG	30	1.15385
TACTCACTGACAGAATGAAT	30	1.15385
AATTAAGGGAGATGTGATAA	30	1.15385
ACCACTTTCATGATAAACCT	30	1.15385
ATTCCAACGGTCGCTCGCGT	30	1.15385
CCAAGACAACAGAAAGAGAT	30	1.15385
GAGAGCTGAGAGTTTGGCTA	30	1.15385
GTTTATCTTTCAGTCGCAAC	30	1.15385
GGAGATGAACGACTGGTATA	30	1.15385
TACATCCATGGAAAACCAAC	30	1.15385
TCAAGGCCTATGCGCAGAGG	30	1.15385
GTGGTCGGGTAAAAAAACAA	30	1.15385
GCAATGTGCAAGCATATTTA	30	1.15385
AAGTATGAACTCCTTTTTCT	30	1.15385
GTTCCATTAATAGGCATGAG	30	1.15385
AGCCCAAATGGCGGCCCAAA	30	1.15385
CAGAAGGGACAAGCCAGAAC	30	1.15385
TGGGGTTCTGATGGAGGGTA	30	1.15385
ACATTCCAAACATCATTTGG	30	1.15385
CCACGTAGTTCTCCCAAAAT	30	1.15385
GTTGGACTGAAAACCTGAAA	30	1.15385
TTTTGGGGCTAGCATGTGAA	30	1.15385
TTTTTGGGGCTAGCATGTGA	30	1.15385
GTGAATCGATGGGAGGTGGT	30	1.15385
TTACGAAGCAAAGTAGATGA	30	1.15385
TGAACCGTATGTTTTTGAGT	30	1.15385
AGGAGTTCAGACATCCAATG	30	1.15385
TTTTGTTTCCCGAGTAATGA	30	1.15385
GGGACTTTTGGGGATAGTTT	30	1.15385
CCTTGTTCCCAGCAAAGTCT	30	1.15385
AACAAGCTTTCCCCTCTTTT	30	1.15385
CATGGGGTTCTGAAGCACGT	30	1.15385
AGTCAGTCAGTTAATAAAAG	30	1.15385
AGACAAAGGGAGGTGCAACT	30	1.15385
GGAACAGGAGTTAGGGTTAT	30	1.15385
AGGTCATCCAAAGTAACCAA	30	1.15385
TGGTTGAGGGGTTTGGGTGT	30	1.15385
GTGAGCGCTTGGTGGTCACC	30	1.15385
GATGATGATCGGGTACTCTG	30	1.15385
GTGTAGGACTCCAAATTTGT	30	1.15385
GAGGCGCCCTCGAAACACTA	30	1.15385
CTGCCAAATTCTTCCTCAGT	30	1.15385
AAGCAAGTATGTGATAGGTT	30	1.15385
CCATGACTTGGAAGAGAATT	30	1.15385
TGTATGAACTGATATGTGAT	30	1.15385
TGAAGGTGGAGAAGTCACCT	30	1.15385
TGATGGTTTTCCGTAAATTT	30	1.15385
CGAGAGAAGAGCCTAAAGGA	30	1.15385
AACACGAGAGAAGAGCCTAA	30	1.15385
CCCAGAAGTTCTGAAAGGAG	30	1.15385
AAAAGAGAGAGAGGTTGGAG	30	1.15385
GGTAAGTTGCACGACTTTGC	30	1.15385
AACGCCGGTGCATTACGCCC	30	1.15385
TGTGATCATCAATGGAAACA	30	1.15385
TGAGAATCAAAACCCTAATT	30	1.15385
CAATGAAGCCAAAACATTAC	30	1.15385
TGAACGGTAAAAGTTGGAAT	30	1.15385
AGACCAAGAATCTCAGGTAA	30	1.15385
TTTGGTCTTTGTCTTGGACT	30	1.15385
CACTACTTTGTCTCGTGTGC	30	1.15385
CTGTATTCTGCAAAGGTCCA	30	1.15385
TTGAATTTCATTAACACCCT	30	1.15385
GGTAAGTTGCATGACTCTGC	30	1.15385
GACATGTTCTAATGGTTATA	30	1.15385
GTTCTAGTGGTTGAGAAAGA	30	1.15385
TGTGTCAAATGAAAGGTGTT	30	1.15385
CTTATCAATTGGACAGAGCT	30	1.15385
GTGCAGAAATTGGTTAAAGC	30	1.15385
AGCATGTGCATTATGAAAGT	30	1.15385
CTCATGCGGTTGAATTATGT	30	1.15385
ACCCGCACTCTGCTGGAGAT	30	1.15385
ACCATGTCAGTAAAGTTTGT	30	1.15385
TGGCCATCTTACTTTCTGTG	30	1.15385
GGTACCTCAGGAATCTCGTC	30	1.15385
AGAAGGGTTACTACATACTT	30	1.15385
GTGTGTTAGAGGAAAAGGTT	30	1.15385
GAAATATTCTAAATCTGAGG	30	1.15385
TAACTGTTGTCATGCAAAGT	30	1.15385
TTATTTAGAGTAGCTTGGTA	30	1.15385
GAAGGTTTTTTAGGACAGTT	30	1.15385
CATGGAAGCACCTCTGGAAT	30	1.15385
CAACATGGTAGCAGTGGAAG	30	1.15385
GCATGAAGGAAGCCTGCTCG	30	1.15385
ATCGTTAAGAAAGTCTTCTC	30	1.15385
TCTGAGAGATATGGCGCAAT	30	1.15385
TGTTACTCACAAACCATGGA	30	1.15385
ACCCAAAATAAAATTCTCCA	30	1.15385
GGCTCATCAAAACAAGAGAA	30	1.15385
TCAGAATTAGGAACTGTTGG	30	1.15385
GGTTGTGAGGATGCTTGATG	30	1.15385
TGGTCTATGTGATGTTTGGT	30	1.15385
TTTTTGGTCTATGTGATGTT	30	1.15385
GTGTAAGAGCCCTTAGAGGT	30	1.15385
TGCTGCAAGTAACAAAGCTC	30	1.15385
CGCAACGGTGAAGGTATTCG	30	1.15385
TAGAAGAAGCTGATGACTGG	30	1.15385
TAATGGTTTCTGAAGGTGTA	30	1.15385
TGGTGGATTGGAATTAATGG	30	1.15385
CAAAATAATAATGAGGGAGT	30	1.15385
GTATGAAAAGAAAGACAAGA	30	1.15385
TAATGTGGCTAGGGACATGT	30	1.15385
TGTAGATTGCAGCCAAGTAA	30	1.15385
ATCAAGATTGGGATAATGTT	30	1.15385
TTTATCACGGTTGAAGGAGA	30	1.15385
ACAGTATTTACAAGCAGCAG	30	1.15385
CAGTATTTACAAGCAGCAGT	30	1.15385
AGTATTTACAAGCAGCAGTG	30	1.15385
CCCGAACCCCGTACCTCTAA	30	1.15385
GTTTTGGAAGTATTAACATC	30	1.15385
CGCTTAGGTTGAGCAAGAGA	30	1.15385
GAAAGTTTTGAGGTATAGCA	30	1.15385
TCCTGTTCAGAAAAAAGACA	30	1.15385
CCTGTTCAGAAAAAAGACAT	30	1.15385
GAGTAGTGGCTTTCTGCTTG	30	1.15385
CCGTTTAATTCGAAGGCAAC	30	1.15385
GGTAACTTAAGCCTTTGCAA	30	1.15385
TGGCCCTGTGTATCCTGCAT	30	1.15385
GTAGTTCTGTAGTTGTCTTC	30	1.15385
AAAGTAATTTTTTGTGGGGA	30	1.15385
AGTTGCAATTGGTGTTCATC	30	1.15385
GGTTCGCTTAAGTTTGTCGA	30	1.15385
GACTCATGAGGGAAATACTC	30	1.15385
GTCCATGCAACAGAGAGAGA	30	1.15385
TGAAGTTTTCATAAGAATCC	30	1.15385
ACTCATTACCATCACACCTT	30	1.15385
AAACGAGTACCCGAACAAAA	30	1.15385
TGAAAGAGAGTGAAAAACAG	30	1.15385
TTCCAAGGCTGCTAGGGTTA	30	1.15385
TTATAAGAGGTTGTTTGGGA	30	1.15385
TTGGTTATAAGAGGTTGTTT	30	1.15385
TTTGAGAGTGTTTGATGAAT	30	1.15385
CCTATGTGCATTCTTGGCCA	30	1.15385
ATGTTTTACAGAGGCAGATC	30	1.15385
TTTCTTTACATGATCTGAGA	30	1.15385
AGCAGCATTTTACACGAATT	30	1.15385
GTCTACTGTTAAGAAGCAAT	30	1.15385
ACATTTGTCCCTTCAGGTCT	30	1.15385
CTCCACTGGTTTCTCTGACT	30	1.15385
TGATCTTTGGCATGACATTT	30	1.15385
GCACCATTGGGGAATTTCCG	30	1.15385
GATAAATTCCTATGAACATG	30	1.15385
TCCTTTTTTGATGGAGCATG	30	1.15385
TCATGTTCAACCCGCATGGG	30	1.15385
ACTAAGGAAGAGCCATGATT	30	1.15385
ACTGGCTCTATAGGAGGTTT	30	1.15385
GATGACGAGCTTGAGAGCAT	30	1.15385
CAGGAAAATCCGGTTCCCAA	30	1.15385
AGGAAAATCCGGTTCCCAAT	30	1.15385
CCCGGACTCGAGGGGAAAAT	30	1.15385
CCCCGGACTCGAGGGGAAAA	30	1.15385
AGGTACGGTAATGAACTGAA	30	1.15385
CACCCTTTCAAAATAAACCT	30	1.15385
AATGGATTAGGGTTTGTATT	30	1.15385
AAGTTATCCGCGACTTGCAC	30	1.15385
TAGAATTTGCTTCGAGGAAT	30	1.15385
TTCAAACTTTCACACCCTTC	30	1.15385
AGACAATCAGCTACCCGTCA	30	1.15385
AGAAATCTAGGAAGTACAGC	30	1.15385
TTGAATTTGAGTGGCAAACA	30	1.15385
AATTTGAGTGAACTTGGGTA	30	1.15385
ACTAATCCAACTGATTGCAA	30	1.15385
TGTGGCCAAGAAACCTATCA	30	1.15385
CAACACCAAAGTTTGCTGAT	30	1.15385
AGCAGAACAACATACAGCGG	30	1.15385
TACAGCTGTAACAACAACCA	30	1.15385
ATGTTTTGAAGGGGGGCAGA	30	1.15385
GTCCTTTAAGAGTGTATGAG	30	1.15385
GACCTCTCATACACTCTTAA	30	1.15385
AGAAGATGATGAATCAGGCT	30	1.15385
AACGAAGAAGATGATGAATC	30	1.15385
AAAGAAAGAATACAGAGTCA	30	1.15385
GGTGGCTATCAACAAGGTGT	30	1.15385
AGAAGAGAGAGAGATATGTT	30	1.15385
GAGAAGAGAGAGAGATATGT	30	1.15385
GATTGGTGGATTTTGTGAAG	30	1.15385
ATTGGTGGATTTTGTGAAGT	30	1.15385
TTGGTGGATTTTGTGAAGTG	30	1.15385
AACTTCTCAAAACCGGAGAA	30	1.15385
GATCTGATTGTGCATTTCGG	30	1.15385
GAATTGTATGGCATTGGTCT	30	1.15385
GCGCTAGCATCATAATTATG	30	1.15385
TGGCTCAAGTTTTGAGGTTG	30	1.15385
TATGGTTCTGCTCAGGTGTG	30	1.15385
GCTCCTCTTCTTCTCTTCCT	30	1.15385
CACAAGTTACCGCTCCGAGA	30	1.15385
GATAGAGGATTTTATGGAGA	30	1.15385
TCTATTAACCGGTTAACACC	30	1.15385
TAGATTTCTGAGTGGATGAA	30	1.15385
TTGAAGACATCATTGGGGAT	30	1.15385
CCATCTGTTTTTGGTCTATT	30	1.15385
TTGGTCATAAGAGTATGTTT	30	1.15385
CTTTTTAGAACCAAACCTCT	30	1.15385
GTTATATTTGTGAACAATGG	30	1.15385
GTGCATTGGTTTGGCCAGTT	30	1.15385
TTATAGGCCACTTGCTTTTT	30	1.15385
CGTTTGTAAGGGAGGGGACG	30	1.15385
TGCTTTTTTGGGATGAACTT	30	1.15385
CTTTGTAGAACCCGTTTGAC	30	1.15385
GTCAAAAGCGTTGGCAACCT	30	1.15385
ATATGATGTAGCTTAGGAAT	30	1.15385
TTTGTAGAAGTATTTCTACG	30	1.15385
GTTGCTGGGGGTTATCTTTC	30	1.15385
CTCTACCAAGACAGAGCAAT	30	1.15385
GAGGTTAAGTGAGTGTTATG	30	1.15385
ACCTGATATTGCTTATGCTG	30	1.15385
TGCTTAGACCTTTTCAACAA	30	1.15385
ACTGTTATGGCTGGATTTGG	30	1.15385
TCCATCGGTATCACATGGGA	30	1.15385
TGAAGCCTTCAGAATGGAAG	30	1.15385
TAGTTTGTGCGAGCTTTTGA	30	1.15385
AGCAAAAGTCAATTAGGTCT	30	1.15385
AGAAAAGGTTCTGAGGTTGA	30	1.15385
GGGTTGATCCACACACCTTT	30	1.15385
GCATCCCCCTCCTTTCTTGA	30	1.15385
GGCATCCCCCTCCTTTCTTG	30	1.15385
TCTGCAGACCAAGAGCCTGT	30	1.15385
ACTACATGGCCAGATAGAGT	30	1.15385
ACTGTCAAGGACTGCCCACA	30	1.15385
AACTGTCAAGGACTGCCCAC	30	1.15385
GCCCTCAATATCAATAGAAT	30	1.15385
TTTGAACTTGAATTCCCTCA	30	1.15385
AATAAGCTGACTTGCTTTTG	30	1.15385
AACGCAGACAGGACAAGCCA	30	1.15385
AAAAGAAAGAAATGAAGTGG	30	1.15385
GATGAAGATGATTACGGTGT	30	1.15385
TATGCAATGAAATGATCCAG	30	1.15385
ACGTCGACTAAGCGACTGCT	30	1.15385
ACAGCTCAAGCCCCTCACTT	30	1.15385
AAGCCGAGACGAGAGCAGAG	30	1.15385
GGTCTTGGTATACACTGGTA	30	1.15385
TTGGTATACACTGGTAGGGG	30	1.15385
TATGATGTTTGGATGGAGTT	30	1.15385
ATGATGTTTGGATGGAGTTT	30	1.15385
TTGGATGGAGTTTGGGTAGG	30	1.15385
CGGCGCGAAGGAGGTTGACG	30	1.15385
ACAGGCAAGAACCAACAACA	30	1.15385
ATGAAACCAATACCACTAGG	30	1.15385
TTCCTTCACTCAGTTCTTTC	30	1.15385
CTCCAGAAAGAACTGAGTGA	30	1.15385
TTAAGAGTTACTCCGGTAAT	30	1.15385
TTCTTTCAGAATATCTGCCG	30	1.15385
GGAGGTAAACAACTGGTGTA	30	1.15385
AAAAAAAGCATGCCACGGGC	30	1.15385
ATTGCAAATGTTGTGCACAT	30	1.15385
CTAGGGTTGACTCACTTATA	30	1.15385
CAGACCGGTGTACTTCTCAA	30	1.15385
TTATGTAAACCAGTTGGAAG	30	1.15385
TTTATGTAAACCAGTTGGAA	30	1.15385
ATTACAAGTTGGGACTTCAG	30	1.15385
TATCTCATTTTTGCCAGTTT	30	1.15385
GTTTTGATACTCGTTAGACT	30	1.15385
CTACTCTAATAATCGGGAAT	30	1.15385
GAAAAGTGTTTGCTTTAGCT	30	1.15385
GATGGGGGCACGAATGTTCT	30	1.15385
GGGGCACGAATGTTCTGGGA	30	1.15385
TCAGTGCAAGAAGCCGAAGA	30	1.15385
TAGTCGTATCCTGGTGTTGT	30	1.15385
ATTCTGGGGCATACTGACCA	30	1.15385
GCTGGGGGTGAATTTATCCA	30	1.15385
GATGGCTAGGGACTCTGGTT	30	1.15385
TGGTTAGATTCCCCAGCTAA	30	1.15385
ATGTCGACCTACCTCATGAA	30	1.15385
GTGAAGGAAAATCACCTTGT	30	1.15385
AAGGAAAATCACCTTGTTGG	30	1.15385
ATGAACCAAAATGATGACGA	30	1.15385
GGCACTGGCTCTATTCACCC	30	1.15385
ACACCAGGCACAACCTACAA	30	1.15385
CTTGCTCGACCTGACGTGGG	30	1.15385
CTTTCTCTCCAAGCCACAAC	30	1.15385
ACAGTTACAGTTGGAATTTA	30	1.15385
CAGGTTTGGTGTGATGGTTA	30	1.15385
TCCTAAATAAAGGCCAAGGA	30	1.15385
AACACGCTTACCACCAGGCC	30	1.15385
GGATAACTATGTAGGGCTTT	30	1.15385
GGGAGAAACAAACAACTCCA	30	1.15385
GCAACTCGTACTTTTACCGT	30	1.15385
TTGCTCTAATTGCAAGATCT	30	1.15385
TCTGCACAAGCATGGGCAAG	30	1.15385
GAGCGTACTATCCGAATATT	30	1.15385
ATATTACCCTGAAGATGTGA	30	1.15385
GTTCCAGCATTCTCAATGTT	30	1.15385
TTAAGCAAGAAAGAGACATG	30	1.15385
AACCCACAAGGTGTGTTCTA	30	1.15385
TTTCTTAAATGAGCGATCAT	30	1.15385
CTTACTGTTGACAGTTTTTC	30	1.15385
TGAAAAACTGTCAACAGTAA	30	1.15385
AACGCGTGGTGTAGTGGATG	30	1.15385
GGATCATTTTGTGACAAAAG	30	1.15385
GCTGACGTACCTCGAGAAGA	30	1.15385
TGCTGACGTACCTCGAGAAG	30	1.15385
CATCTTCTCGATGGAGGAAG	30	1.15385
AGGGCATCGAAAGGCTGTCT	30	1.15385
TGGGATTACAACGAAATTCC	30	1.15385
TTTTCAGGTGGAGTGTCAGA	30	1.15385
TAGTTTATGAGGTTATGTAG	30	1.15385
TCAACACGAGGTCACCCACT	30	1.15385
TTTTCGACAAGCTAAGACTT	30	1.15385
ACCCCATGAGTATTTATTTG	30	1.15385
TATCGACACACTCAGTTACA	30	1.15385
AAGGCTAGATTAGTAGTCAA	30	1.15385
AATAAATCGCGTGTCGGAAT	30	1.15385
TCTGTGAAGTTCTTTCTCAG	30	1.15385
ATATGGGCTTAAGAGATGAC	30	1.15385
AAATTGTCTAGTGGCATTTT	30	1.15385
TTTGAATCCCTAATTTTGCC	30	1.15385
TTTTCTTTTGCCAAGAATCT	30	1.15385
GATGAAGTACTGGGCTCTGC	30	1.15385
GAAACCTCAGGATGAAGTAC	30	1.15385
TCGAGACATTCTTCTTCCTC	30	1.15385
TCCACGAGGAATATCTATGT	30	1.15385
ATGAAAATTCTGCAACCTTA	30	1.15385
GTTCAGAGTGCACCTAAGAG	30	1.15385
GATGTCGGACGCCGTTATGT	30	1.15385
GAAAAGATTGTGAGTCTTCA	30	1.15385
AAGTGATTGGTGTATGCATA	30	1.15385
GGGAATTTTTGGAAGTGTGA	30	1.15385
TATGGTGAGGGCTTGCTCCT	30	1.15385
CCGTAGAGGTAAGCATCCGA	30	1.15385
ACCCATATGGAGCTCTTGAG	30	1.15385
TTTTCTAGAACGGACACCGA	30	1.15385
GAGGACCGATGAAGACTGTT	30	1.15385
TGAGGACCGATGAAGACTGT	30	1.15385
CCAACCGCATCAAGAAGAAG	30	1.15385
AGCAATCGAAGAACTTCAGA	30	1.15385
GCAATCGAAGAACTTCAGAT	30	1.15385
TGTATTAGGAGATTCAGCTT	30	1.15385
GAAAGTATTTGTGACTCAGT	30	1.15385
TGAGGGCTACTTTGGATACC	30	1.15385
AATGCAGTAGGGGAAGAGGT	30	1.15385
TTCGTCACAATGGGAAATGG	30	1.15385
TGTCATGGATGTGAAGGGTA	30	1.15385
GAAAATTAGGGTGTTACAAC	30	1.15385
GTGATTGGAAGCATGTCATG	30	1.15385
TGATTGGAAGCATGTCATGT	30	1.15385
GATTGGAAGCATGTCATGTG	30	1.15385
TAGCCAAGGCAATTGGAGAG	30	1.15385
AAGCAGGGTGGTAAGGGGAA	30	1.15385
ATGCTGTTTTGGTTGAGTTT	30	1.15385
TAGCTCAAGCCCACTAACCC	30	1.15385
CTTTAACTTTTGGTGGAGTG	30	1.15385
AATGTGAAGGCTTGTCTGGG	30	1.15385
GTGTTTATCTTTTTGAGCGC	30	1.15385
CACAATTCAGATCCAAGGCA	30	1.15385
AGGATCTGCTGATTTCCATC	30	1.15385
CCACATAGAGAAAGGCCATG	30	1.15385
CCCCATGGCCTTTCTCTATG	30	1.15385
GCATTGTTTGCATATAAAGT	30	1.15385
GCCTCTTTGGATATTGTCTT	30	1.15385
GGGTCAAAATTGGTCTTTCT	30	1.15385
GGCTTTATGGTGAGTGGTGA	30	1.15385
ATGAATCTGACAAAGAATGG	30	1.15385
CTCCTTAACTTTTGCTTCAC	30	1.15385
CTTAACTTTTGCTTCACAGG	30	1.15385
CCATCGGCTCTTGGAAAGGT	30	1.15385
CCAACCTTTCCAAGAGCCGA	30	1.15385
CTTGTCTTTATATCTCAAAG	30	1.15385
ACCTGAAAATCCATCCATGA	30	1.15385
GCATATGATAGGTCAAAATG	30	1.15385
TTTGATGTCAAAAGGCATTT	30	1.15385
CTGTTATATTTTTGGGTTGG	30	1.15385
TCTTGCCCTTCACATCTTCA	30	1.15385
AGTGTGTTGATGAGCCTGTT	30	1.15385
AAAGGAGGGGTTTTCAAAGG	30	1.15385
TTGGGATGGGTCTTGAAGGT	30	1.15385
AATAGGTGAAAATACGCGAC	30	1.15385
TAGTGGGGAAAAAGGAGTAG	30	1.15385
CCTTCGATCCAAACCAGATA	30	1.15385
CCTTATCTGGTTTGGATCGA	30	1.15385
TCTGGTGACTGTGAGCGCTC	30	1.15385
AGAGCGCTCACAGTCACCAG	30	1.15385
CACTGTCGTACTTTGAAAGG	30	1.15385
CACTAGCCAGATGAGAACAG	30	1.15385
GCCTGTCCAAACATTGACAA	30	1.15385
CGCCCAAACGAGGTTCTCAA	30	1.15385
GCCCAAACGAGGTTCTCAAT	30	1.15385
CTGATCTTGAGAGCCATATT	30	1.15385
GGCATATATGAAAGGTTTGA	30	1.15385
TCGCGTATCACTCACAACAG	30	1.15385
TTTTTGTTAAGACATCCGTG	30	1.15385
CTCTGCCGGGGAAATCTCTT	30	1.15385
TCACAAGATGTATTCCCCAT	30	1.15385
TGATGCGTGGTATGTCGTCG	30	1.15385
CCTGGCTCAGGTCCTTCTTC	30	1.15385
GCACTATTCGTTCGAAAGTT	30	1.15385
TGGAAGGATGAGGAAGATGG	30	1.15385
AAAAATTTCTCAGCGTTAAC	30	1.15385
TTGCCCAAAGACACATGTCA	30	1.15385
TTTGATACACAGCTCCCTAT	30	1.15385
AATTAGGATTAGGGTTCTTG	30	1.15385
ATGATACCTTTTGCACTACA	30	1.15385
AATAATATCACACCCTAAAC	30	1.15385
ACTATCCTCGAAGAATCGAT	30	1.15385
TCAGTTGCACATAGACTCGT	30	1.15385
AGGATTTGGTATGCTGTTTG	30	1.15385
TGATTTGATGAGGGAATATG	30	1.15385
ATTTGTTGTTGGCATTTCAG	30	1.15385
TCATCGCATCACCCCCTATA	30	1.15385
GGGCAAAATTTGGTGAACTT	30	1.15385
TTGAAGCATAGGTCAGGAAT	30	1.15385
CTGGTGCTTATGGTTGTGTT	30	1.15385
ACGGTTCCCATCGAGTACGG	30	1.15385
ATTGATTACAATGGATGTGT	30	1.15385
ACACATCCATTGTAATCAAT	30	1.15385
CACACATCCATTGTAATCAA	30	1.15385
AGGTTAAGCAAGAGATGGCA	30	1.15385
TCTAAATCACCTTCAGATCC	30	1.15385
TTTTCAGGTTAAGTGTTTCT	30	1.15385
GAATCAAACAAATACCAAGA	30	1.15385
TGCAAGGAGGATCAAAATCT	30	1.15385
CAAGAAAAGAAGTTTTGGCC	30	1.15385
ATTCCTCAGAAAATTCAGCC	30	1.15385
AACATCTTATATTGGTCCTA	30	1.15385
GGACATCAATATGGGGCAAA	30	1.15385
ATTGGCCATATGTGGTTGTT	30	1.15385
CCATCCCAAACAACCACATA	30	1.15385
GTCTGAAGCCCTAAGAAATT	30	1.15385
GGGAATCGGTTCCCCACTTA	30	1.15385
ATGACATGACACAATGCATG	30	1.15385
TCCGTTGTTTTGAGAGGTAT	30	1.15385
GAATACTTAACCTTTGTATG	30	1.15385
CATAGCAAAGGGCCACGGAG	30	1.15385
AGGTACGAAGTGCCAGGATG	30	1.15385
AGATTCTACAGTGGGAATCT	30	1.15385
CTCCACCAGCTCATAATTGA	30	1.15385
TGTGTGACGCTGGTGAGAAG	30	1.15385
ACATGACAGCTCCCTCACCC	30	1.15385
TTGTGGTAGTAAATGAAGCA	30	1.15385
AAAATTCGGATTTTCGTTTG	30	1.15385
CCTTTTGGGAGAACTACGTA	30	1.15385
TTCAGGTAAATGAGAAAGTC	30	1.15385
CTTTGAGTCCATATCACCTT	30	1.15385
GTGTGCCGAACCTAACCTTC	30	1.15385
ACCGACTAATGTGAATAAAT	30	1.15385
ATTTTGGGTAGTGGGAGAGT	30	1.15385
GAAAACATCGAGAAAACCCT	30	1.15385
GGATGGTTTGCTTATTATTA	30	1.15385
CCCAGAACATGACTTCCTTC	30	1.15385
AGATTCTGTTTGGTTCTTCT	30	1.15385
GAGGTACCATCTGGATAGAG	30	1.15385
TGAGGTACCATCTGGATAGA	30	1.15385
TCAATAATCGACTCCGCTTG	30	1.15385
GATTTTCGAGTTGATGAAAA	30	1.15385
CTTCGAGCATTGTTTCTGAT	30	1.15385
CTTGCATATGTCGATGTTGA	30	1.15385
ACAAACGGTTCCGACGGGTT	30	1.15385
CTACTGTACATGATCAAATT	30	1.15385
GGATGAGTTTTGACCTTATG	30	1.15385
TTGAAGTTCTGTCAAATTAG	30	1.15385
AGGGAGAGAGACAGGAGGTG	30	1.15385
AAGAGGTAGGGCAAATTTTA	30	1.15385
GCAGCAGCAGCAATGCTGAG	30	1.15385
ACAAGGTGGTCATAGCCCGC	30	1.15385
TATCATGCCTTGCCCTCTAT	30	1.15385
TTGAGGCATGAGGTTTAAGA	30	1.15385
AGGAGGATATGAGAGGAAGT	30	1.15385
CTCAGAAACACAGATACAGT	30	1.15385
ACGGAAACAATCACTTTCCA	30	1.15385
GGTACAATCAAAACATATTC	30	1.15385
ACAAGAAACAGTAAGCCAAG	30	1.15385
TTACTTGCATGCAGTATCTA	30	1.15385
TATCTGTCTGTAAAACCCAG	30	1.15385
CCCGAGAGAGGAAAATCAGT	30	1.15385
TTTTTCTCTCGTTTATGGCA	30	1.15385
GTTGATAAGGAGGTGTGAAT	30	1.15385
TTGATAAGGAGGTGTGAATA	30	1.15385
GCTGATGACACTTTACTTGT	30	1.15385
AGAGAGGGAAAGTTGGTTGA	30	1.15385
ACAATATGCAAACATAACAC	30	1.15385
GGGGTGAGATTGGCCTTGTA	30	1.15385
GTAGTTTCTCGAACTAATTT	30	1.15385
TAATTATTGCGGGGTTTAGA	30	1.15385
TCTGTGTATTTTCACGTGTA	30	1.15385
AATTTCGAATCTATTCGCGG	30	1.15385
GGCAAGATCGTTCAGGAAGG	30	1.15385
CCGAGTCGATTGGACTTGAT	30	1.15385
GAGTATGATTGTAAAATGCA	30	1.15385
GCGTGTCAGAAGTCTGTGGA	30	1.15385
TTGATATCCCAGTTCCAGCT	30	1.15385
TCTTGAAGACTTCATACTTT	30	1.15385
TTTTAGCTTCTGATGGAGAG	30	1.15385
GGATGATTTCAAGACAGCTA	30	1.15385
TAAAGGTGACTTTGATGTTT	30	1.15385
TAGACCTTTACAAGAATAAG	30	1.15385
AAAACAACATTTCGATGCCC	30	1.15385
ATGGCCCTCAAGTAGGCCAA	30	1.15385
CGCAGTATCGTCTTCCCCAG	30	1.15385
AAAGCAACAGCGATCTGCGG	30	1.15385
TCTGCAAGAGCATGGGTCAG	30	1.15385
GACCGTGGATCCATGCTGCT	30	1.15385
TCACCAAGCAGGTGGTAGCT	30	1.15385
GATGCCCCGGCCGTGACACA	30	1.15385
TTCTTTTTCTTCTGAGGAGG	30	1.15385
GCTCTGATACAAACTGAAGG	30	1.15385
CCTAACTAGGGTCAATTCAA	30	1.15385
CCGGTTAACACGCAGAAAAA	30	1.15385
CCATTTTTCTGCGTGTTAAC	30	1.15385
TAGAGTCTAGGTAAGGGGGT	30	1.15385
AGGAATGACTGACTCCACTA	30	1.15385
CACTTTCCAATTTTCGATTT	30	1.15385
GACTCCAGATAGTGTGATGT	30	1.15385
CAATTGAGTGTTGTATCGTG	30	1.15385
TTCACCACCTCTACCTTGAT	30	1.15385
CTTTCTTGAATTCTCGTGGT	30	1.15385
TCGGGAACGAACGCGTCGAG	30	1.15385
GGACCATACCCCTCTTGGGC	30	1.15385
AAAAACGTCCAAGCTCTGAC	30	1.15385
GCTGACGCAGTTCCTTTTTC	30	1.15385
ATGCTCAAAGCCCACGGATT	30	1.15385
GATATGCATGCACACATATT	30	1.15385
TATCTCTACTCAAATACGAT	30	1.15385
TCCGTCTCATGTGATTCAAA	30	1.15385
ATCCTCTGGTGCATTGAGGA	30	1.15385
ATTCCAAGAGTCAAGACTTA	30	1.15385
CTGTCTTGAAGACCAGCAGT	30	1.15385
GATTCGAATTTGCTTCAAAG	30	1.15385
GGTCTAGAGATATCAGAACT	30	1.15385
AGTCTTGAAGCCTCCCGCAT	30	1.15385
CAAGTTGCAGTAGCTTCTTT	30	1.15385
TTAACTTACTTAGGACCACA	30	1.15385
TGCTTGGGCTTTCCTTGCTT	30	1.15385
AACCGGTCAAGAGTTGACTT	30	1.15385
TTACATGAATGTGACCAAGC	30	1.15385
CATATCCAGAGTGAAACTTG	30	1.15385
ATGTGGTCTTTGAGCTAACC	30	1.15385
TTGCAAGGGTTTGAAGGTTT	30	1.15385
ATAAAAATGGAACTGGTGTT	30	1.15385
ACGTGTGGGGCTCATCAAAC	30	1.15385
GATCGGTAGTTATTGTCTCA	30	1.15385
AACTGTTGAATTCAACAGTA	30	1.15385
TCAAATTCAGGCCCAAGCTC	30	1.15385
GTCAATGAGGTTCTGTCAAT	30	1.15385
TTCGAATGAACGGTTTGGCC	30	1.15385
AGAAAAACATAGGATAGATG	30	1.15385
CTGACAGAGAGAGGTGGGAA	30	1.15385
TGTGAGCTACCAACCAAACT	30	1.15385
TCGAAGAGAAGACTTGGGAG	30	1.15385
GAAGACTTCGTAGTAAACTG	30	1.15385
CGACAATAAGGTCGAAGCAA	30	1.15385
AGAACATCTTTAGCCATGTC	30	1.15385
GGAGACTCCTCAACAGCTGC	30	1.15385
TCACTTTACCCACTCGCACA	30	1.15385
AAGGGAATAAGTGAGTAAAT	30	1.15385
TACTTGGAAAGGAAAAAGAG	30	1.15385
GAAGACAAAGAAAAATGGGA	30	1.15385
CCCGGATCACTCTCTTTCTT	30	1.15385
GGGGGATCAGCAGGAGTCAC	30	1.15385
GAGGGGCACGATGATACTTA	30	1.15385
GGTTTTGAGGTATTTTGAGA	30	1.15385
AGGCTGTCATGTGGTTTGAA	30	1.15385
AACTTACGAAGGCAAATGGA	30	1.15385
TTATAACTTACGAAGGCAAA	30	1.15385
GAAAAAGTCAAAATTGTGTG	30	1.15385
ATTTCTCAGCATTTTCTTCA	30	1.15385
TTGTGAAGCTAATGGAACAG	30	1.15385
TCACAATCGGGATAACAACC	30	1.15385
CACAATCGGGATAACAACCA	30	1.15385
AGTTCATTGGGCGTTTAATC	30	1.15385
TCATTGAAGGTAACATTTGT	30	1.15385
TTTTGAAACCTGAGGTGAAC	30	1.15385
AAGGGACTATGCTAACCTGT	30	1.15385
GATGATTTAGCAAAGGCAAA	30	1.15385
GTGAGGTCTGGTAAGCTACT	30	1.15385
GAAAAGCCTGGGCTTTGAAT	30	1.15385
TTTGTCAACTCCATTGAATA	30	1.15385
GGTTTCGTGGTTCACAAAAA	30	1.15385
TTTCATGACAGTGTAGAATT	30	1.15385
CTCTTCTTCTCAATAAACTC	30	1.15385
GGGGAAGATGATTTTATGGA	30	1.15385
AGGTACGAAGTGCCAAGACG	30	1.15385
TTGTTGGTTCTCTGCGTTTT	30	1.15385
CTAACTATGTTGACCAGAAA	30	1.15385
TTTCTGGTCAACATAGTTAG	30	1.15385
ATCTATTCCGGAGTGGAAGT	30	1.15385
AGAGGCCTTGCTGAGCGAAG	30	1.15385
TGTTGACACAGACCATCAAT	30	1.15385
TTGTTGACACAGACCATCAA	30	1.15385
[truncated: 58,001 more rows]

## Sheet: Guide Pool 4
gRNA target sequence	number of targets	Relative frequency
AACTCTCAACTCAAACCCAA	27	1.03846
AGGTAAAAAGTTTCTCTGTG	27	1.03846
TGGATTGGGATTGGGCCTTT	27	1.03846
AGGAAATAGCTAGAATGAAA	27	1.03846
TTGCATTACGTCACTTCCCA	27	1.03846
ATGATGGGTTTGGATTTATT	27	1.03846
ATCCCTAACTTCGAGGGACA	27	1.03846
CGGCCATGTCCCTCGAAGTT	27	1.03846
AAAATTGACTCTTATGCATG	27	1.03846
TATCTTTCGGTCACAACCGG	27	1.03846
ATCAGCCGGAGGATCGTTTT	27	1.03846
AGTGTTATGCTTAAGCACTA	27	1.03846
GCTGTGAGGGGGAGAAGTTA	27	1.03846
TGCGAAAGTGACAAAACAAG	27	1.03846
GCTGGATAGGTTGGCTGGAA	27	1.03846
GAAAGTTAAACAAGGCAACC	27	1.03846
CTTTTTCAGCCTTGGATCAT	27	1.03846
CAACAATGGAAAAGAAGAAA	27	1.03846
CTGCACCCTCTGAATTGTTA	27	1.03846
AAGTTTGGAGGAAACTAGAA	27	1.03846
CTTTGATACCTCAGCAATGC	27	1.03846
AACAAGCCTCCTCTGTTTTC	27	1.03846
GGCAATCACCCATTCGACTT	27	1.03846
AGTCGAAGCTGGAATTAAAG	27	1.03846
AGGGAAGTTTCATTCTCCTA	27	1.03846
TGGGGTTCTTCACGGGGAAG	27	1.03846
AGGTGATTTGTGAAGCATAA	27	1.03846
TTGATTTGGAGGCTTTATGG	27	1.03846
TTTTTGATTTGGAGGCTTTA	27	1.03846
GTTTTGTTGAGGGGATTACT	27	1.03846
AATCATGGAAAAATAAGGGT	27	1.03846
TTTCAGAGGGGAGAATCCGC	27	1.03846
GATTGTTGGAATTGATAAAG	27	1.03846
GGTTGTTGTGTGTCGGCATC	27	1.03846
AAATGTTATGCACCAGTATC	27	1.03846
AAGCTCTGGAAGATAACGAT	27	1.03846
TTTCATAGTGGACAATTAAG	27	1.03846
GGCCAAGGCAATTGGAGAGT	27	1.03846
CCCCAACAATTACTAAAGAA	27	1.03846
AATCAGTCTAGAGAGACTTA	27	1.03846
TGAGAGAAGGACTAAGAAAA	27	1.03846
TACGCGATGAATACTGCCCC	27	1.03846
TGTTCCAAGGGGTAGAAGAG	27	1.03846
GCTGAGGATTAGCGGGATCC	27	1.03846
TCTAGTTCATCTTGTTAACT	27	1.03846
TTTCACATATATGGTCAACA	27	1.03846
TGGTGATAGTTCATCCTCCT	27	1.03846
TGACCTCTTCTCTAATCTTG	27	1.03846
ACTCGTGAATGTCCTCTGGT	27	1.03846
TCCGTCTCATGTGGTTTAGA	27	1.03846
GGATGTCCTGGGGAGTTAGG	27	1.03846
CGAACAACAAAATTACGCGC	27	1.03846
TCCATATTTGATATGGTGGT	27	1.03846
CCATATTTGATATGGTGGTA	27	1.03846
GAGAGAAATCAAATCTTCCT	27	1.03846
GAGTCTGGGGTCCAGAAGAT	27	1.03846
AGAGTCTGGGGTCCAGAAGA	27	1.03846
AAGGATCTGGGCAAAAGTTA	27	1.03846
TGCACACTTTTGGATTAATC	27	1.03846
CTTCAGATCTCTGATCTTGT	27	1.03846
TAGAGAATGTTCAGATCTTC	27	1.03846
AGTTGAATTGATTTCGGGTT	27	1.03846
TACGAGGAAATTGTTTTTAG	27	1.03846
TTGAGACTTGTTACATAGTA	27	1.03846
ATTTTTTGTAGACCTTGTCG	27	1.03846
CTTCTCAAAGGATGAGGAGC	27	1.03846
GGAAGAGAAGAAGAGGAGCT	27	1.03846
GGCAGAATGTTTATGGGAAC	27	1.03846
CTGATGATTTTACATCTGAG	27	1.03846
TTATCGCTTGAACGCTGGAT	27	1.03846
TTAGATTTTACGGGGTTCGG	27	1.03846
ATCAGAAGAAGTCCAACTTG	27	1.03846
TTCTTTCAAGATAGCCTATC	27	1.03846
GTTGATGGAAAGAGAATTGG	27	1.03846
ATGACAATTCTCAAGCCAAA	27	1.03846
TAGAGACTGGAGAATTCAGA	27	1.03846
CTTAGTCATGGTATGTTCGT	27	1.03846
GGTTGATATCCTCTCTTTCA	27	1.03846
ACCAAATCTTTTGACTCCAC	27	1.03846
TGAAAGGGTAAACTTGGCTG	27	1.03846
AAAGCCAGGGCATGAGTGGA	27	1.03846
GCAAAGTCTTGTTGTGAATG	27	1.03846
AAAACTCGAGGATAACTCGA	27	1.03846
GGCTATTTGTGAATGGTTTG	27	1.03846
TTTCAGCTGGTGTGTGTATT	27	1.03846
GGTCTGGACTAGGGGGTCTT	27	1.03846
GGGTCTGGACTAGGGGGTCT	27	1.03846
ATCGTTGAATAGTGTTTTCT	27	1.03846
AAGTATTTTTGGCATCACAG	27	1.03846
GGGTCATTTGCGTCGACGCA	27	1.03846
ACTTTAATTGTGGTGAAGAG	27	1.03846
GCAATCTCCTTTTTCATCCC	27	1.03846
GAGGTGGGATCAGGTTCTAA	27	1.03846
TTCTCTGAATTGTGCTTAAC	27	1.03846
GAAATGTGAATTCTGGCTAA	27	1.03846
TCCATCAGATCATAAATCCT	27	1.03846
CCCTATCAGATCATGTATTT	27	1.03846
AAAAGGTCAAGCATTTATCT	27	1.03846
ACCATTAGTACATACCTTGT	27	1.03846
GTTGGGCTGTTTTGGGTGAT	27	1.03846
AGAACTGAACTTGAAGCTGA	27	1.03846
GATAATGCCATGAATGACTG	27	1.03846
TTTTTAAGCTCAGCTAAATC	27	1.03846
TTCCGAGATAAGGAGTTTTC	27	1.03846
CCTCAAGAGTTACAGGTTCG	27	1.03846
CCCCGAACCTGTAACTCTTG	27	1.03846
TGACCTTGCTGAAAAGATTG	27	1.03846
ACCCATCTGGAAACACTGCT	27	1.03846
GATTTTTTCCTAACTTCCCA	27	1.03846
AACTCTGGTTTGAAGGGTTT	27	1.03846
AAAACTGAAGATAAGGGAAA	27	1.03846
ATATCCAAAGAGGCTGTTAG	27	1.03846
TACTCTATTATGCACATAGC	27	1.03846
ATGATGTTTGGGTTGAGTTG	27	1.03846
CTTGTCATTTCTTGTTTTCG	27	1.03846
TCAGGCCAAAGCTGATAAAC	27	1.03846
AAGCCACTAAGGGAACCTTA	27	1.03846
ATTCATAGCTCTTTGGTAAG	27	1.03846
TGATGTTCTGAGTTTCGAAG	27	1.03846
GATGTTCTGAGTTTCGAAGA	27	1.03846
CAAAAAAGCATAGGCTGCTG	27	1.03846
CATATGTTGACCTAACAAAT	27	1.03846
CGGGAAAGAGCGGATGCGAA	27	1.03846
TTGGAGTTTTGACCCAAATT	27	1.03846
CAAATAGTTAGCATTGCAAA	27	1.03846
AGACCCTACCGGGGAAAAGG	27	1.03846
ACCGGAGGAACGCCAGGGCT	27	1.03846
TTCTTCTTTTTGGTCGAGAG	27	1.03846
TCTTCTTCTTTTTGGTCGAG	27	1.03846
ACTTCAGGAGAAAGCTTAAC	27	1.03846
ACAGGAATAGTAGTTTCCTT	27	1.03846
TGTTTCGACAGCAGGAGTAG	27	1.03846
TCTGCGACAATGCCGTCTGT	27	1.03846
TTCAGGTACTGGCACGAAAA	27	1.03846
CACTAATCAGCAGCAATACC	27	1.03846
CAATGTTGTGGATGAAAGTG	27	1.03846
GTAGGTAATAACTGATAGTC	27	1.03846
GAGAAATGGCAGAGTGTTTG	27	1.03846
CTTGACTGAGAACACCTCTG	27	1.03846
TTTTGGTAAAGGAAGGGTTA	27	1.03846
GAACTGTTTGAAGTCTCACT	27	1.03846
GTTTTCTTTCAAGAGATCAT	27	1.03846
CTCCTGTGTTCTCATTTCAA	27	1.03846
ACAATATTGGTGTCTAGACC	27	1.03846
TTCCAACGTGATCCTGGTTC	27	1.03846
CTCGTAATGCCATAATCTCT	27	1.03846
TATGCCCAACTTTACCACAG	27	1.03846
TGTGCTTCACCAGCTCAATA	27	1.03846
ATCGGGTACTGTTATAATCA	27	1.03846
GCAACTCTAAGGGGATGGAC	27	1.03846
GAAAAAACTCCACGCAACAG	27	1.03846
CATTTTTCCGTTAGAGAAGT	27	1.03846
AGTCAAAAGATCACATGTTA	27	1.03846
TGAAGAAGAGACTTTGGTGT	27	1.03846
AATCATCACTGTTGTGATTA	27	1.03846
AGAGGAAGGAGCTTCCATGC	27	1.03846
GAGGAAGGAGCTTCCATGCT	27	1.03846
CAAGATCACCTTCTTTGTAA	27	1.03846
AAGACCCTAATTTGAAGAAA	27	1.03846
ATTGGGATTCGTTGGTAGTA	27	1.03846
ACATCACAGAAATGAAAATG	27	1.03846
TTAAAGAAATCATTTGGCGT	27	1.03846
AGAAGATGTTACCGAGTTGA	27	1.03846
GTTGTTTGTTAGGACGCCCT	27	1.03846
ATGTGATTTCATCGAAGTAC	27	1.03846
ACCGTGCGTTTAAGGGATTT	27	1.03846
GCATGAATGCAACGGGATCA	27	1.03846
TCCAGATGTATTTCCTGAAG	27	1.03846
GGAAGGGTCAAGCCTTTATT	27	1.03846
ATGACTATGTTGACCAGGAA	27	1.03846
GATGACTATGTTGACCAGGA	27	1.03846
CCATTGCAATCCAAACCCTA	27	1.03846
CCCATTGCAATCCAAACCCT	27	1.03846
GTAGCTTGGGGAGGACAAGC	27	1.03846
TGAATGCAAGGTCCTTTTAT	27	1.03846
TTGACAGGAATTGGGGGTTG	27	1.03846
CCATTCACGAGCTAGAGGTT	27	1.03846
ATTGCTTCCATTATGCCAGA	27	1.03846
CAAGGGCATAGTCAGCAAGA	27	1.03846
TTCTTTTGCCACAACACACA	27	1.03846
GGCACTAGTTCAGTTCAACC	27	1.03846
TGGAACTCGCAATGCTTCTG	27	1.03846
ACTGAATTCTACCCTGTCCC	27	1.03846
ACGGACAGAGGAAGAAAATA	27	1.03846
GTCTCTTGTGACATATCTTG	27	1.03846
TGTAACGTTTGATATGATGT	27	1.03846
GACTTAGTTCTGAAACCCAA	27	1.03846
GTAGAGAAGAACAAGAAAAC	27	1.03846
AAATCAAAGGAATGGATTGT	27	1.03846
GTTATTATAGCCGTTATTGA	27	1.03846
TTTGATGTGTTAGTCAAAGA	27	1.03846
TTGAGGGCTACAAAAGAAAC	27	1.03846
GTAAGAGGGAAAGAGAGATT	27	1.03846
TCTTGTTCTTCGAACTTTTG	27	1.03846
CAGAAGTGTTAGGGTTTTGA	27	1.03846
TAGCACATATCCGAATTTGT	27	1.03846
CCACAATATAGACAAACAAC	27	1.03846
TGTGGATCGGTTAACTAAAT	27	1.03846
GAGAGGTAAAGAGATTGTTT	27	1.03846
GGCAGAATGTTTAGGGAACT	27	1.03846
ACGCTGATGGCTGTAGCAAA	27	1.03846
ACTCCGAAAAGCGTTAAATT	27	1.03846
ACCTTAAAAGGGCCTTGTGA	27	1.03846
GGTTCATCCCAGGGTGTTCT	27	1.03846
CCAGAAGAGGGACCCGAACC	27	1.03846
GGAGAAGTATGACAAAAAGA	27	1.03846
CAAGTAAGGATCAATTACAA	27	1.03846
CCATCTTTATCCTTTTTGAC	27	1.03846
GTGATTTTGCAAGAGGCTTT	27	1.03846
TCTGGTTGAACCAAAAACAG	27	1.03846
ATTCATAGCTCTCTGATACG	27	1.03846
TTACCTTGCTGAAAAGATTG	27	1.03846
CACGCAGTATTTAAGAGATA	27	1.03846
CCAGAAAGAGAAGTAGAATT	27	1.03846
ATCAATTTGTTCACATGAGT	27	1.03846
TACTCGAAAACGGGCTGGCT	27	1.03846
TGCGTGTTGTTGGTTTGTTG	27	1.03846
TTGAATGATGTTCAAATGGT	27	1.03846
GGAAGTAGCACAAGGGCTGT	27	1.03846
GAAGTAGCACAAGGGCTGTT	27	1.03846
TGGAGGCCTTTTGTGTGCTA	27	1.03846
AGTGTATCTCCAGTAAAAGT	27	1.03846
ACTTTCACTGAAGGTATCTT	27	1.03846
AAGATACCTTCAGTGAAAGT	27	1.03846
GGAATACCATCAGTAAAGGT	27	1.03846
CATTGGACCCTCTTTTACTA	27	1.03846
CCATCTTCAATAGAAGCTGA	27	1.03846
AGTAGTCTTGTGTTTGGTAG	27	1.03846
TTGTGTCAGGCTATGAAAGG	27	1.03846
ATTTGAGGTTTGTAGTGATT	27	1.03846
TCCATTACTGAAGATGTTCA	27	1.03846
TCTATTTTGTTGCGGATATC	27	1.03846
TGAAAAGGAACCTGCTCGCA	27	1.03846
TCAAGACCCTGCTGGGGACG	27	1.03846
CTAGATAAGGTAAGTTTCCT	27	1.03846
TTGTATGTTGCTGTTAGTGA	27	1.03846
CCTGGAGGACATACCACTAC	27	1.03846
ACCATTTTGTGGAGTAACCT	27	1.03846
AGGCTATTTATAGGTGAGTT	27	1.03846
CTTGGTGACAGTTTTGAGGT	27	1.03846
CGGTGACCGATTGGGACCAA	27	1.03846
GAGGTAAAGCTAACTGTTTT	27	1.03846
GTGGACCAGTTTTGACAGTT	27	1.03846
GGCATAAGGTCATTTTTCAA	27	1.03846
TTTTCAAGCAAAGATGGCAA	27	1.03846
AATTTTGGGGTACAACACAC	27	1.03846
TCGCGGCGCGCGAACAAGGG	27	1.03846
CGTTCTCGCTAAGCGAGAAG	27	1.03846
GCCATCTTTGCGCTTGTACC	27	1.03846
TCCGGAAAATGAAAACAAAA	27	1.03846
TCCTAAATTCATCGATCAAT	27	1.03846
AAGGCCAGGCTGGTAGCACA	27	1.03846
TAAGTATGGACTTTGTGTCT	27	1.03846
CCCCGCGAAGTTCAAAACTC	27	1.03846
TACTTACCTCATCTTTACCA	27	1.03846
GCAACAAGGTTCAATGGTTG	27	1.03846
CAGAAGTGTACTTTCTTTGA	27	1.03846
AGCAGTGCCACTTTCTGCTA	27	1.03846
GACCATTACCCTGAAAAATA	27	1.03846
ACCCTTCAGAGAAGCAGCTT	27	1.03846
TCCTCACAAACAAACAGCTG	27	1.03846
ACCCTCGTGAGTCATCTTTA	27	1.03846
GGCAAAACGCGCTGCCATCT	27	1.03846
AAAATAGAAGTGCATTCCCC	27	1.03846
CTAAATTGGGCCTCCCCATG	27	1.03846
TGTTGGGTCTCCAAATGACG	27	1.03846
GCTTGAGCCCTTCTTGTTGA	27	1.03846
ACAAGAAGGGCTCAAGCTCA	27	1.03846
GGTACTACCATCTAAGTTCA	27	1.03846
GGGCGCTAGGACTCGAACCC	27	1.03846
AAAAAGTAGCTGACTTAGGT	27	1.03846
TCAGAAAAGTTTCCCGAGCC	27	1.03846
ATATCCAAGAACATGTCATT	27	1.03846
ATATGCAAAAGTGAGGTTCT	27	1.03846
GTTCTTGATATGCAAAAGTG	27	1.03846
TGATCCACGGGATGTTATGT	27	1.03846
TCAAGCCATAGAAATGGGAC	27	1.03846
ATGTCTTTTCTCGTATTAGG	27	1.03846
TTAGGAGGCAACAACATGGG	27	1.03846
GACCATACCTCCCACAATAC	27	1.03846
TGGAGGTAAAGGTGAACTCA	27	1.03846
GTTACATACTGCATGGCTTA	27	1.03846
AAGGGATGCCAAGAGTGTTT	27	1.03846
CAGAGGACTGTGCCAATCAG	27	1.03846
AGATCAATGACTGTTTTGAG	27	1.03846
GAATGCATTTGGTGATATTA	27	1.03846
GGCAACTTAGGCAAAATCAA	27	1.03846
GTGCAAAATCTGATAGATGA	27	1.03846
ACTAATCCTCTACCTAATCA	27	1.03846
CTTCAATGCACGACCAACAC	27	1.03846
TATTGTGAGTTCCATTATGG	27	1.03846
GCGCAGCAAAAATAGTTTTC	27	1.03846
TGTAGCATTTTCACGACGGA	27	1.03846
AATCCTTGAAACGGTTTTAA	27	1.03846
GGACATAAACACATGCAGAA	27	1.03846
GCATAGGGAAAAACGCTCGA	27	1.03846
TAAGCCTTGTTGTAGGCTTG	27	1.03846
CAATTATGCAACCTCCAGAT	27	1.03846
GGTATCTTCCAATAATTCCA	27	1.03846
GAGCCATGTTTTCGATAAGT	27	1.03846
ATGGATTTGAGAGGCAAACT	27	1.03846
GTTCAAGTTTTGGTCTTTTG	27	1.03846
AAGGGACTGTGTGAAGTACT	27	1.03846
TGTTCATAGGCTGTGGCAAT	27	1.03846
GCTTGATAGGATCATGATGA	27	1.03846
GGAAAGGAGGTTATGCAATT	27	1.03846
AACTCCTGCTTCTAGGCTCA	27	1.03846
AACGTGTGTTCCACCTGGCG	27	1.03846
TCGTGCTACCAATGGGGTTT	27	1.03846
AGGACAAGGATCCTTGGGGA	27	1.03846
GATGTCTGTATTCACAAAAG	27	1.03846
GTCTGTATTCACAAAAGAGG	27	1.03846
TTTGAATATTGGTTCGCATG	27	1.03846
CTTGATCCTTAAATCGATCG	27	1.03846
CCCCCGGTAATACGATATCG	27	1.03846
CCGCGATATCGTATTACCGG	27	1.03846
CGAAAACAACAAAATCCAGA	27	1.03846
AGTTTGGAGTTCGCTCCAAA	27	1.03846
TGCGGCCGTGTGTCATGGGC	27	1.03846
TTTTAAAGGTTGCATCAACC	27	1.03846
ATTCTTAAAACAGCTCATGA	27	1.03846
GCATCTAGATGGGATCGGTG	27	1.03846
AAGCTTTGAAATGATGGAAA	27	1.03846
CTTTCTCCTCTTCACGCTTT	27	1.03846
CTTCTTGCTCAAATAGTAAA	27	1.03846
TGCTTGACAGGAGGGCACTC	27	1.03846
TTTGAAAGATATGCTTCTTG	27	1.03846
CAAGGTCGTGGATCCTTCTT	27	1.03846
GTCTGGCATAACGACTTGTA	27	1.03846
ACTTCGGGAGAGAGTCTAGC	27	1.03846
TGGTAAATCATATAGTTGAC	27	1.03846
TATTGGTCTGGTTCTAGTTG	27	1.03846
CGTCACGAATCCGAGGTAAG	27	1.03846
GGCTCTAGCTGCTATGGCTT	27	1.03846
TTATTCAGTTGCAAACCGTT	27	1.03846
CTCTGATACAATTCTAGAAA	27	1.03846
TTGTAGACGATCAACAAGAC	27	1.03846
TAAAAATGCATATTCCACAG	27	1.03846
TGCTAAGGCTTTGGAGACTT	27	1.03846
CCGGACGAGGCTAAAGGTAA	27	1.03846
ATCATGAAAAGGAAAAGATC	27	1.03846
TTTCAAAGTGAGTATGGTGA	27	1.03846
ATTGGCTCGAAAATAAATCG	27	1.03846
TATTTCCTTGCTTCAGCTCG	27	1.03846
AAGATCAATTGTCAGACCAA	27	1.03846
TTGCAATGCTTAGAATCAGT	27	1.03846
TAAGGGTTTTGCAACCCCTA	27	1.03846
ACTTGGGGATTTGAGGCCTA	27	1.03846
AACTCCATTCCATAATGCCT	27	1.03846
CTGACTGATAAGAAAATGGT	27	1.03846
TACAAGTGTTTGACTTCTGT	27	1.03846
GACGCTCTGAGGAGACCATC	27	1.03846
TACATATTGATATAGGGTTG	27	1.03846
GAAAGGTGAAAATGATGTGC	27	1.03846
GAAGAGAACATAAGGATTGA	27	1.03846
ACCATATTGAGAAATTCGAA	27	1.03846
TCACAAGGTTGGATTGGTGG	27	1.03846
CGTAAGGAACAAAGCAAGGA	27	1.03846
AAATTCTAAGGATGGTCTTA	27	1.03846
GAGACAACTGACCACAAACT	27	1.03846
AACCTAATTACTATGTCCAT	27	1.03846
GATATGAGGATGATGAGCTA	27	1.03846
AAGCATTCTCTAAGGCTGCT	27	1.03846
GCCCCAAATCAATATTACAA	27	1.03846
GCCTTTGTAATATTGATTTG	27	1.03846
TACCTACAGTTTGAACCAAA	27	1.03846
CTGAGTTAATTGAAGCTAAC	27	1.03846
AGACGTCAATATGGGGCAGA	27	1.03846
GGATATGAGGATCATTGAGA	27	1.03846
ACACAGACTTTCATCCACCC	27	1.03846
GGGGTGGATGAAAGTCTGTG	27	1.03846
GAAAGCTATAGAGGGGAAAG	27	1.03846
CAGGGTCTGGTTTTGGCCAT	27	1.03846
GCCATTGGGCTGCTAAAACT	27	1.03846
TCCAATTACCGTGCCAAGCC	27	1.03846
AAGAATCGTGATCATAGTGT	27	1.03846
TGCTCTTGACTGGAGGAGAA	27	1.03846
TCAATAAATCAGTGGACGTT	27	1.03846
GACACCACTGTTATCTGTCA	27	1.03846
CACTTGTAGTTCAAATATTG	27	1.03846
TCGGTCAATCAGGGTAATGG	27	1.03846
CTCCTAAGTCATACTTTCAC	27	1.03846
CTCCCTTCTTCCTCTACCTT	27	1.03846
GAGGTCATTGGAATAGGTTT	27	1.03846
CTCCTCTGGGGGAAGGGAGG	27	1.03846
AGCTGTCTTCTGGCAAGGGT	27	1.03846
TCAGCCATTTGTCTTCGCAC	27	1.03846
GCCTCGATACGTACTTCAAC	27	1.03846
AGATTTGCAAATCATATGGT	27	1.03846
TAGACACAAACACATGCAGA	27	1.03846
GGGTGAAGTGGGACACGTCA	27	1.03846
GAAAGGAAAATTGACTTTTG	27	1.03846
GGAAAATTGACTTTTGAGGT	27	1.03846
AGTATTCATGGATGATTTCT	27	1.03846
TATTTATTTCCCATAGAGGA	27	1.03846
TCTGATCAACTTCACTTTCT	27	1.03846
AATTCCCTTGGTTAGGGTAT	27	1.03846
ACAGTAGGAGCAGGAGATGG	27	1.03846
CTTAGGATCCTTCTTTTGCT	27	1.03846
AACAAGAAAATCAAGTCCTA	27	1.03846
CGGCGCGAACATGCCCTTCG	27	1.03846
GTTACATGGTTTGCCATTGT	27	1.03846
CATTTTCCTGTTGTTTTGAG	27	1.03846
TTCTCAATAAATGGAGGTGG	27	1.03846
TGGCTCTTCTCAATAAATGG	27	1.03846
ATTTGGCTCTTCTCAATAAA	27	1.03846
ACTCTTCCTCTGAATAAAGG	27	1.03846
GAACCAATTGTCAAATTGAT	27	1.03846
ACCAATTGTCAAATTGATTG	27	1.03846
TAAGGAGTTCTCATGCTCTG	27	1.03846
CTCAAGAAAGTCCTTCCAAT	27	1.03846
GATCTCAAATTACCATCAAT	27	1.03846
GACTACCATCTGTGATCTAC	27	1.03846
TCCTCTTCATCTTGGTAGAC	27	1.03846
AAGCGTCTTGTAGATTTTGG	27	1.03846
AGAAGAAGGAAGGAACTATG	27	1.03846
TGGATAAAACTTTGACAGTT	27	1.03846
GGTATAAGAAATTACGTCCT	27	1.03846
GTATAAGAAATTACGTCCTT	27	1.03846
TTGGATTTTGATGATTGTGA	27	1.03846
ATTGGATTTTGATGATTGTG	27	1.03846
GCATGAAAAATGCAAGGTTT	27	1.03846
ATGATTTGGTCAGCTCATGT	27	1.03846
TCACATATGAGGTGTGTGGA	27	1.03846
AGGGTCACATATGAGGTGTG	27	1.03846
GGCAGCCTGTGTACAAATCA	27	1.03846
AATGTCAAGGTTTGGTATTT	27	1.03846
AGTTTGTGAAGTATGAGGTT	27	1.03846
TGAGAAAGAGGTTAACAACA	27	1.03846
CTTGAACAACGATTCACAAG	27	1.03846
AGTGATAAAGGGGAAGGCTA	27	1.03846
TTGATGGCGTTTGAAGCAAC	27	1.03846
AATATCTGGGAACCAAGCTG	27	1.03846
GCTTTTTGATCCAGATGTTG	27	1.03846
ACCTTCAGTGGACGTGGGTA	27	1.03846
AGAACAGTTAACTGACCCTG	27	1.03846
AACAGTTAACTGACCCTGAG	27	1.03846
CAGGTTGACAGATCTCCTTC	27	1.03846
CGGTCCAATGTTGTTGTTGT	27	1.03846
AGTGGGAATTATGAGTTTTT	27	1.03846
GATGGAGAGTGGATTTTGGG	27	1.03846
GTGTGATTTCGATAGAGATT	27	1.03846
TTACATGATCCCATTGTAGG	27	1.03846
TTTCACACGGCGACAAACTG	27	1.03846
GGCTTTGGGTATGCTGGCTG	27	1.03846
CAAGAATATCTACTCAGAAA	27	1.03846
TTCACGCGATTACCTCTTAT	27	1.03846
CGGAAAGGTTAGAATGTGTG	27	1.03846
GGTGCTTGGCTCAATTTTGG	27	1.03846
AGTTGTTAGAGTTGTCAATA	27	1.03846
AAACAAGACCTCAATTGATG	27	1.03846
ATAATGTCAGTGTCGAGACC	27	1.03846
TAACTTCGCCAAGGTAGACT	27	1.03846
AGTTATCAAAGTGTGAGTTC	27	1.03846
CAACCTTGTTCTTCATCTTT	27	1.03846
ATCAATTCCCCAATAGAGTC	27	1.03846
AGGGAAAGGAGCCTCCATGC	27	1.03846
AAAACACCTGTTGTAGAAGA	27	1.03846
GTAACAAAATGTCCCCCACG	27	1.03846
GCTGAGCAGCTTGGGCTTCT	27	1.03846
TTATCTTTTGGGAATTGGAA	27	1.03846
GTGGGGTAAAGAGATTGCTT	27	1.03846
TAGCGAGTGGATGGAGTAGC	27	1.03846
GTAGCTTCTGGAGTTGTTTT	27	1.03846
CTCCCAGAGCTTAGTATGAA	27	1.03846
AATTCTCTAATCTAGGTAAG	27	1.03846
TATCTAGAACTGTTGGATTA	27	1.03846
ATGGGTTAGCTGTACGCATT	27	1.03846
GACTGGAAAATATGGGTTGA	27	1.03846
CTGAACAAATTAATTCTTCG	27	1.03846
GAAATCACTCGAGTTTCAGG	27	1.03846
GCCTGTTCGAATTGTTGATC	27	1.03846
ATCTTGGGAATTTGAGGAAA	27	1.03846
CTTTCGTTTTGTTTATGTTG	27	1.03846
AAAGATGGTTTCCTTCACTT	27	1.03846
TGAAGGATTGCAAATGTTAC	27	1.03846
GAGGGATGAAGATGGGGGGG	27	1.03846
TGGTTCATGAGCTGACTTGA	27	1.03846
TGGTTTTTGTTTTGAAGTTG	27	1.03846
TGATTTGGAGTTGGCAGCGG	27	1.03846
AGATGTGAGATGTCGGGCAG	27	1.03846
TGAAGCATCCGAGACTCTTT	27	1.03846
GAAGCATCCGAGACTCTTTG	27	1.03846
GTGGAAACAACCATGCTCTG	27	1.03846
GTTCAGCTGGCGACTCTTCT	27	1.03846
GTACAAGGGTATTGGCAAGG	27	1.03846
ACAGTTCGATGCAGGCTTCC	27	1.03846
AAGAAGGTGAACGAAGAAGA	27	1.03846
GAAGAAGAAGGTAATGAAAC	27	1.03846
AAGAAGAAGGTAATGAAACA	27	1.03846
AATAGGTTAAAGGGCTCAAA	27	1.03846
AAAGAGGCTTTTTAGTGGTT	27	1.03846
TTTTCCTAATGTACCTCTCA	27	1.03846
CGAAACTTTCAACTAAGCAG	27	1.03846
TTTCAGAGACAATCTTTCAG	27	1.03846
TAAAGGGAAAAGGCCCAAGA	27	1.03846
GTTCATGGTTTCAAAAACAA	27	1.03846
CAAAGAACTTTGGAATATCA	27	1.03846
GAGGTAGTCGTATCCTGGTT	27	1.03846
ATCCAGATAGGATTTGTTAA	27	1.03846
TGGTGTAAGTTTTGCTACAA	27	1.03846
TTGAGGTGCACTTTAATGTG	27	1.03846
CACTTGGGCTGTGTTCAGCA	27	1.03846
ACACAGATGAAGAGATCACT	27	1.03846
TCTGAAGTCGAAACCATTTT	27	1.03846
AAGGAAGTCAGAGGATTCCT	27	1.03846
GCCAATTGATTTTCCTCCCT	27	1.03846
TCTGTACTCACATGGGTTTA	27	1.03846
CTCCCTGAGAGATAGAGCTT	27	1.03846
TTCTTGTTCCTTCTCATTCT	27	1.03846
TGGGTGGTTATCCAGATCAT	27	1.03846
GTAGTATGTTACATGTTTTG	27	1.03846
CTTTTACCTAAGAACCTCTT	27	1.03846
TCGAGAGCGTAGAATTAAGA	27	1.03846
AAGCAGGTCATTTAAAGTTG	27	1.03846
ACATCCTAAGTAAGGATAAG	27	1.03846
GGACTCATTTGAAGTGTGTT	27	1.03846
GGGAGAACGGATGTGGAAGG	27	1.03846
ACTGTATTTCGTGTAGATTA	27	1.03846
GACTGTATTTCGTGTAGATT	27	1.03846
TTGCATAACATACTCTCTGT	27	1.03846
AGTTGTCTTCTCGCAAGAGC	27	1.03846
TGGATGGGACTTGCGCGCGC	27	1.03846
AACATCATCACCCTCAAGGA	27	1.03846
GTTTATCGCTGTGGTAAAGT	27	1.03846
GAGAAATAATCCCATGAAGT	27	1.03846
TCGATAGTTGGATAGATTTA	27	1.03846
TCAGATGCAGATGAAAGGCG	27	1.03846
TGAAATTAATGCTTCTGGAC	27	1.03846
TACTGAGTCATATGTGACTC	27	1.03846
GTCTCTCGTATGTTGAGCCG	27	1.03846
ATGTTTATGGGTACCCTTCA	27	1.03846
CCTTTGACTCGATGAGATCT	27	1.03846
CACTGAAGGAAAGGATCCTC	27	1.03846
GGATGATGCTGCTATTGCTG	27	1.03846
CCTAACGGATATTACCCATT	27	1.03846
GAGTGGGTGAAAGGCAAGTG	27	1.03846
TTGAGGAGGATGACCAGACA	27	1.03846
CAGGAAAAGTAGTGGTCGAA	27	1.03846
ATTTGAGGATTGGTATGAAG	27	1.03846
TTTGAGGATTGGTATGAAGA	27	1.03846
AATATGGTTATAAGATGGTG	27	1.03846
TCGCATTATGTCGGTGTTGT	27	1.03846
AAAACACTTCACAGGAGCAG	27	1.03846
GAGATGAAGTGCCAGGACGG	27	1.03846
TTTTTTTCCCGTGTTACTGA	27	1.03846
TTTCGATGTCCTGTTGATGT	27	1.03846
ATGACCACTACTAAGCTTTA	27	1.03846
GATGATGAGTTATGTTGATA	27	1.03846
TTTGAATCGCGAGTCAAAGT	27	1.03846
TGTCGTATTTTGATTGTTAC	27	1.03846
AGGTTGGTTTTCTGTTGTTG	27	1.03846
GGTTGGTTTTCTGTTGTTGT	27	1.03846
GTGTGAGCATGTGTCCATTC	27	1.03846
AACTATCTAAGTGTGATTTC	27	1.03846
CAGTACAGAGCCATAGATAT	27	1.03846
CAGCAGCTTCCAACTCAATG	27	1.03846
AGCAGCTTCCAACTCAATGC	27	1.03846
AGAATGTCAATTTCCAAAAG	27	1.03846
ATTTGCTGTTGATCTAGATT	27	1.03846
TGTTGGAGAAGAGTGGTGCT	27	1.03846
GAAAACCATAGCCAATTCAA	27	1.03846
CTCCAAATTCTCCAAGCAGT	27	1.03846
TTTAGGGTAGCCCTAAGTGG	27	1.03846
CTGAGGTGTTTTTGTGGATA	27	1.03846
GGACTGATTTGAGACAGTTG	27	1.03846
TTCAAGTCATGGTTTTTGAA	27	1.03846
GTGAAGAACAAAGACAAGAA	27	1.03846
TGGGGTTTAGAGGTCAAAAT	27	1.03846
TTCGCCCAGATTTTGTAATG	27	1.03846
GACTGTTTGAGGTGAAAAAT	27	1.03846
TTTGGGAAATTAAGTTGGAA	27	1.03846
GATTAGGGTTTCCTCTGGTC	27	1.03846
TGGTTCTGCTAGGATTTTGG	27	1.03846
GGCAAAAATGTGAGAAAAGG	27	1.03846
ATTGGATAGGGTTTATGTTT	27	1.03846
CACCACTTAGACCATCCCTA	27	1.03846
CATAAATACCCCAGGTGCAT	27	1.03846
TTTGCCATCATCAAAAAAGG	27	1.03846
TGATGATCTAGGTCAAATTT	27	1.03846
CAAAAACAGCCCACAAGCTT	27	1.03846
GATTGTGTATGCATGCTGTT	27	1.03846
GCAGACACTGTGAAAGCAAA	27	1.03846
ACCCATTTACTATCGGATAT	27	1.03846
CTGTTGACTATGTGTCCAAA	27	1.03846
GAGAAATTGTTGCTTAAGTA	27	1.03846
AGGGAGTTAGCATAATACGT	27	1.03846
TGGTATATGGCGAGGTGGGG	27	1.03846
TCAGCTGATGGTATATGGCG	27	1.03846
CCACTATCCGCTATTTCTTC	27	1.03846
CGGAAGAAATAGCGGATAGT	27	1.03846
GCTTCACCAGCCTGATTGAA	27	1.03846
TACTATGAATGTAATGAACC	27	1.03846
CACTTGTTCCTTGAGAGACT	27	1.03846
TTGATTAAAAAGAGGAGAAG	27	1.03846
TCAGAGGATTAAAACTCTGA	27	1.03846
GTGGAAAAACTCTTAGAAGG	27	1.03846
TGGAAAAACTCTTAGAAGGG	27	1.03846
GCTTACCGTTGTGTGAAAAT	27	1.03846
GCAATACCACTGGCGAAAGA	27	1.03846
CTTGCACGGGTACCGTACCT	27	1.03846
CTTTCAAATATCCAACAGGT	27	1.03846
CGAACAACCAAAATACACAC	27	1.03846
GCTGGTGAGAGAGGGGACGC	27	1.03846
GAAATATACGTGATATAGGT	27	1.03846
CAAAAACAGCCCACTTTGTT	27	1.03846
TCTGAGAAAGGAAAAGACAA	27	1.03846
TATACGCGTATGGGATTGGC	27	1.03846
GGAGGGCATTCTGGTTTCAA	27	1.03846
TATCTGAACTGTAAGGCATC	27	1.03846
TGAGGTCTATGGGTGAAATT	27	1.03846
TTTTTGAATTGGTGGCTTTA	27	1.03846
TTCGTCTCATGTCATCCAGA	27	1.03846
TGATACAGACCAATGAATTT	27	1.03846
GTGTAGAAGAGTTAGTAAAA	27	1.03846
CTAATGACGGGAAAAATCGA	27	1.03846
GAAAGGACTTGATAACGATG	27	1.03846
TGCTTCAATTTTGGTGAAGA	27	1.03846
TTGGATAAAGCAAAAACCGG	27	1.03846
CACATGCCCTTTAGCCGATA	27	1.03846
ATCTTGCCCCACATTTCCGT	27	1.03846
TTTTGGTCTTTTGGTGGTTA	27	1.03846
AGGGAACTGAGTCAGCAACA	27	1.03846
AAGGGAACTGAGTCAGCAAC	27	1.03846
GCTGACTCAGTTCCCTTTTC	27	1.03846
GGAATCATCAACTGAACAAG	27	1.03846
ATTATGCAGTTGTGTACGGT	27	1.03846
CTGGAAAAGTCAAACTTCAT	27	1.03846
CCAGCTTATAGTTGTCTGTT	27	1.03846
TTCTGAAGTTGATTACGGTT	27	1.03846
TCGAGTCCTTCTTCTGTAAC	27	1.03846
GGTTTGAAGTGTCATATGAC	27	1.03846
GGGAATGTGGAAACCTGTTG	27	1.03846
AGGGAATGTGGAAACCTGTT	27	1.03846
AGGGATGAAAAGTGAGGTTA	27	1.03846
AAGGAATTTGGGGTTTAATG	27	1.03846
AAACAGTTGTGGAGACAACC	27	1.03846
TTTTCTGTGATGGTTGTGAC	27	1.03846
GGTCTCTACCTTCGGCAGGT	27	1.03846
TGGAATGCACAAGACGCCTC	27	1.03846
ATAGGTATTTTTCTGCTTAG	27	1.03846
TCATTCGACACTCATGCTAA	27	1.03846
AATGGTAGTCCTCAACTGGT	27	1.03846
TACAAAGGTCAGATTACAGT	27	1.03846
ACCATTCATCTTTGGGCGAT	27	1.03846
GTCACCATTTCTGTCGCGGC	27	1.03846
CAGAGTCACCATTTCTGTCG	27	1.03846
TAGGTCATTTGTGGCTGGTT	27	1.03846
GATGAAGAACTACCCGATGA	27	1.03846
AACTAAGGTCTTTGGTTTCA	27	1.03846
TTGGATTAACGTTTGCTCAA	27	1.03846
CAAAGGAAAAACTTAAGACT	27	1.03846
GTGGTACTTGTCATATTCTC	27	1.03846
CGTTAACTGATTAACCATAT	27	1.03846
ACCACCTGTAATGTCATTCG	27	1.03846
ACCTGTAATGTCATTCGAGG	27	1.03846
TCCTCGAATGACATTACAGG	27	1.03846
ATGGTTTGGTTAGCTTCTAT	27	1.03846
ATAAGCCAATTAAGTGACAA	27	1.03846
CCAAAAGTGAGAACCTTTTC	27	1.03846
GCGTACTGTAGGTGATTAAT	27	1.03846
CCAAGAGGATCAGTAATAGC	27	1.03846
TGATGGTTTCGTCTGAGTGA	27	1.03846
TCCGACGGAAAGAACCTGTT	27	1.03846
GCCAAACAGGTTCTTTCCGT	27	1.03846
TCAATAACAACATACAGAAG	27	1.03846
GTTTTCTGGGCGCATTCAGT	27	1.03846
ACATTCCATATTTCCATGTT	27	1.03846
AGAAGAGGGTAGAAGAAATA	27	1.03846
GCCGCTGCTATGAAGAGAAG	27	1.03846
TGTCTGGAGCTGAGCAGCGT	27	1.03846
CGCCCATAGATTCATGAGGC	27	1.03846
ATCAATTTACCAAGGTAAGG	27	1.03846
CATCAATTTACCAAGGTAAG	27	1.03846
TTCATCAATTTACCAAGGTA	27	1.03846
CTAACTCATGATTGAAAGCA	27	1.03846
GCATTGTCTTCTTTGGGCGG	27	1.03846
GTTTAATTGGTTAGTTGACC	27	1.03846
AAGTTTTTCACTCTGTTAAC	27	1.03846
TCTCTGAAATCGGTAAGTTT	27	1.03846
TAGGTCGGTTAAGTTGTCAT	27	1.03846
ACAAAGGCTGTTGGGTTTTG	27	1.03846
GGCAAGGTGTTTGTGAGCTT	27	1.03846
GGCAAGTTGTGAGTTGGTGA	27	1.03846
CAAAACTCTTTTACCAATGC	27	1.03846
AACAAGCTATCGGGTACCAG	27	1.03846
TTCTACACCCGAGGATACGT	27	1.03846
ATCTCATTTAGCCTAATGGA	27	1.03846
AGTTCGCGGCGCGAACAAAG	27	1.03846
GCCGAAAACGGCACCTAATT	27	1.03846
AATGTTGAAACTGACGAGAA	27	1.03846
GTTTTGCAGTTGTGTACGGT	27	1.03846
GGAGCACCACCGTGGAAGAT	27	1.03846
CAAAGAGTTATGTTCTTATG	27	1.03846
AAGTATGAACATGGAGAATC	27	1.03846
GGCATTTGAAACATAGATCA	27	1.03846
GCATTTGAAACATAGATCAT	27	1.03846
GAGATTCAAGGGGAAGATTA	27	1.03846
TATGTGAAGGCCTTGGATTT	27	1.03846
AGGCCTTGGATTTTGGTCTT	27	1.03846
CAAGAAAAATGCATGGTGTG	27	1.03846
TCAATGCTAAGGCAAATGGA	27	1.03846
CTTCCCGGTCGGCCGGATTT	27	1.03846
ACTGGCTCTTGATAGCCAAC	27	1.03846
TGACAGTATGTCTCGAGTGC	27	1.03846
TATCGCTGGGTTCTAAGTTG	27	1.03846
GGAGGTGCCTGTTGGCGAGG	27	1.03846
ACAGTCATTCCTCCCTTTTT	27	1.03846
AACTTCTTGAAAATGGACAA	27	1.03846
GGGTTGTAGGTATTGCTGTA	27	1.03846
TAAACAGACTCAAAGAACAT	27	1.03846
AAAACTATTACAAGGCTTTG	27	1.03846
GTGAGTGTTTTGGAGATTTA	27	1.03846
TAGGCCATGGCAAGGAGCAA	27	1.03846
TTTTCGAAATTCCAAAACCA	27	1.03846
GACTGTTTTAAGTCATGGTG	27	1.03846
TTTTAAGTCATGGTGTGGAT	27	1.03846
GATGATTTTGGTGAAATGAG	27	1.03846
ATTGATTTTGTAAGAGGAAG	27	1.03846
TACCATCTGTGATCTGATGG	27	1.03846
ATCGGTTCCAACCAAAGGCG	27	1.03846
GCACCCCCGAGTATTTCGAG	27	1.03846
TGCTTTGAGCTATCAGGACT	27	1.03846
TGGGTTTGTGAAAAGACATG	27	1.03846
GTATGATGACAGGATAGGAC	27	1.03846
ACCAGCATGATTGGTATTCT	27	1.03846
GTTTGGCGTGTGAGTGTGAA	27	1.03846
AAGAAAAGATACGACGAGTC	27	1.03846
TTATCCCTCTTTGTCGCAAC	27	1.03846
CAAATACGGAGAAAAACATG	27	1.03846
GCAAATACGGAGAAAAACAT	27	1.03846
AGCAAATACGGAGAAAAACA	27	1.03846
TTCCAGGTGCAGATTCAGAA	27	1.03846
AACTTGGCAGATTTGGGGTA	27	1.03846
TTCGGAGGTTGGTTACATAG	27	1.03846
GCATAACATATGAACATAGG	27	1.03846
ACAAAGGGAAACACCTAACC	27	1.03846
GAGCTCAACTAGAGAAAGTT	27	1.03846
TGAATGTTTGTGTTGCATGC	27	1.03846
AATGTTTGTGTTGCATGCAG	27	1.03846
ACAATCACAAGACCAAAGCT	27	1.03846
TGAAGATTTGGGCAAGTGAG	27	1.03846
CCATCAAGATTCTCAAAGAA	27	1.03846
CCCTTCTTTGAGAATCTTGA	27	1.03846
GGTTGATCCTGCCAAGATCA	27	1.03846
CAATTCCTCTTTTGCTAACC	27	1.03846
AAAGGGACAAGAAGAGCTAA	27	1.03846
CAAAGGGACAAGAAGAGCTA	27	1.03846
GGTGATACGCGTATGGAAAG	27	1.03846
AAGAGACTCCTCTGGGGAAA	27	1.03846
AGGTATGACGACCAATTTGA	27	1.03846
AGGGAATGGTTGAAGACCTC	27	1.03846
GTCCTGAACCAGGTTCTCAT	27	1.03846
CTCTCTATGGGTACCATCAG	27	1.03846
TCTCTATGGGTACCATCAGA	27	1.03846
GTAAAAGCCATTGCATTGTT	27	1.03846
GAGTATTCCTTTCAAAGTTA	27	1.03846
TGAAACTAGGGTTTTGGATT	27	1.03846
ATATGGGGTAATGTAAACTA	27	1.03846
ATGAAGAGAAGTTACCCTAA	27	1.03846
GTCTCCGCCAAAGATTTATA	27	1.03846
TCTCCGCCAAAGATTTATAC	27	1.03846
AAGCCCGTATAAATCTTTGG	27	1.03846
ACGATCAAGGAGGCTACCTT	27	1.03846
ATTAAACCTACCGCCTCTAA	27	1.03846
TATGGGGATAGAGGATTTGA	27	1.03846
TTTGGTATTTGAAGCTTTTG	27	1.03846
TGGTTTTACAAAGGAAGTTA	27	1.03846
GCTTGAGTTCACACTTTCTA	27	1.03846
TCTGTTTGTTGTTAGATGTT	27	1.03846
TTATCACGATAAGAGGAGAA	27	1.03846
GCAACCCCGATGAATTATTG	27	1.03846
CAGTTTCATGGCTGGTTGAC	27	1.03846
GGATTTTGTGAAGTGACTAT	27	1.03846
GAAGATTTGTTCTCAGGTCT	27	1.03846
AAGCAAGTGTGTGTATCAGT	27	1.03846
GTGTCATATGGAAGATGTTT	27	1.03846
CACCGTACTTTGAAAGGAGG	27	1.03846
CTTCAGGTCGCGCCGCGTGA	27	1.03846
AGGTTAGAGGTCATTGGAAT	27	1.03846
GGATGGTTGGCAAAGGTTAG	27	1.03846
TGATTGAAAGTAGGAACGAC	27	1.03846
ATGCTCAAATTAAGTTGGCT	27	1.03846
GTGTTTTAGGGCCATTTTCA	27	1.03846
AGATGAGATTCAGCGGTCTT	27	1.03846
TCTCACGCTGACACATTGCA	27	1.03846
ATGTTTCGTTTGAACCTATG	27	1.03846
TTGGAATTAGTGAGTTTCGA	27	1.03846
CAATTTCGCTAAGCGAAAGA	27	1.03846
TGGTAGCGGATGCTCTAAGT	27	1.03846
AGAAGAGGGGGTAAGAGATA	27	1.03846
GTTGTTAAAGAAGAAAGTGG	27	1.03846
ATCTGGGCATCTCCCAAGGA	27	1.03846
TGACCCTCTCCAAGGTGTCT	27	1.03846
CTATGAACCGTACCTACAGT	27	1.03846
TATGGTATTTAGGACATGTT	27	1.03846
GAAGGAAAGACCAAGGAAGA	27	1.03846
GAAAGTTCTAATGGCCACTT	27	1.03846
CAAGATGAAAACTCCAACTC	27	1.03846
AACAACTGCGAGTATGACAT	27	1.03846
GTGGCGCGAACTTGCTGCAA	27	1.03846
ACTGGTTTTGTGCCTCCCCA	27	1.03846
TTGGGTGATATTTCAAGAAA	27	1.03846
TAATGATTTGAACGCTTGAT	27	1.03846
ACGCGACAACGAGATTAATC	27	1.03846
ACAAGGTGTTCGACTTCTGC	27	1.03846
CAAGGTGTTCGACTTCTGCG	27	1.03846
GAGACTGAGAACTCAGAAGA	27	1.03846
TACAGAAAAGAAAAAAGGAC	27	1.03846
CGATACAGAGCCATAGAGAT	27	1.03846
GAACAACCAGGTATGTTGAT	27	1.03846
GCAGAGTATATTGTTGCAGC	27	1.03846
TTAACCCTTCTCAATTGAAA	27	1.03846
GCCAGATTGTGGTGATTAAT	27	1.03846
TGGTGTATGATGCAAAAGTG	27	1.03846
TCACCGGACTCAAACAATGA	27	1.03846
AGCTTCAGAGAAGTTACCAT	27	1.03846
CAGATCTTGCGCATCTTTAA	27	1.03846
CCTTAAAGATGCGCAAGATC	27	1.03846
GCACCTCCTGGCCAACGCAT	27	1.03846
TAGAGTCTTCAAAAAGATCT	27	1.03846
CTTCATTCCCGAAGGTTATC	27	1.03846
TGTTTGCTTGTGTGTTTTTC	27	1.03846
TACGCAAGGTTAAGAAATTA	27	1.03846
ACGAAATAGGGTTACCGGCT	27	1.03846
ACTTATCTTTGAAATCGGCA	27	1.03846
ACCTCCAATCTTGCCAAAGT	27	1.03846
ATGGTTGATTTTTTTGGAGA	27	1.03846
TTTGGAGAAAAGAGGAGTTT	27	1.03846
CTTTCTAGGAAATTCCCCAA	27	1.03846
CGTCATGTTCTGCACAAGCA	27	1.03846
TGTTCCTAAGTTGCTTCAAA	27	1.03846
TCTTCTTTGGCTTGGTAAAC	27	1.03846
CAAGGGGGAGTTTGAAAGAT	27	1.03846
GGAACCATATCAGATATAGA	27	1.03846
CATAGAACTGTAGCAAGGTG	27	1.03846
CTGCTGAGGATAGAATCATC	27	1.03846
GGTGATGATGATTCTTGTTT	27	1.03846
CCCTAATTTCGGTCAAAATT	27	1.03846
AAATCGAGCAACCACTTGCT	27	1.03846
GTGGTTTGGGGAAGTCCTGC	27	1.03846
AAGAGAACTTCAAATTTGGC	27	1.03846
AGCCCTAATGCTTGCAACTA	27	1.03846
TCTCATCAATAAGGTTCAAC	27	1.03846
ACAAGAGGTTGTGAACCAAG	27	1.03846
CTTTCAGGGAGCTTCTCGGG	27	1.03846
GGGAGCTTCTCGGGTGGAGC	27	1.03846
CTTTTTCTTGGTTATGGGTA	27	1.03846
GAAGTTTGTTGTTGTTGTTG	27	1.03846
AGACCAAATGCTATGAAATA	27	1.03846
GAGGTTTTGGATTGGTTTAG	27	1.03846
AGAGAAAAACTCCATGGAAC	27	1.03846
GAGAAAAACTCCATGGAACA	27	1.03846
GAGAAAGAAACAGAAAAATG	27	1.03846
ACTTCTTGTCATTATCTGCT	27	1.03846
ACAGCAACCATCATGGAAGA	27	1.03846
CAAGCTTTGTCTCTCGTCAG	27	1.03846
GATGAGCCGTTACCCAACGA	27	1.03846
GGCTTGGATTAGCCCCGTTA	27	1.03846
ATTAAACCATGGCCGTTTCG	27	1.03846
TTGTACTACCAATGGGATTT	27	1.03846
TATGGCGCCAGGACATTGAA	27	1.03846
AGCCATATCTCTTAGATACT	27	1.03846
GGTTTCTATGTTCCTCTTTT	27	1.03846
GTTGGCAACCATGGATGGGG	27	1.03846
AGTCCTAAACAGATCCCATT	27	1.03846
TATGCTTGTGCTGAGATCTC	27	1.03846
TTAGAGGTGAAGTTGCTCTA	27	1.03846
CGAGGAAGAAGAAGAAAAAC	27	1.03846
TTGATGGGTTTTCAAGGTTG	27	1.03846
GCACTAAGTTTGGAGGAAAT	27	1.03846
CCCTTACGGCCTCTTCAAGA	27	1.03846
CATGCAGGCTTAGGTTTTGT	27	1.03846
TCTTCTGGAAGATTCCGCTA	27	1.03846
TTTCAGATCATTGTCCTATT	27	1.03846
TTTTCTTTCTCAAATTCGGA	27	1.03846
CCCATGCATTGAGTCAGTTG	27	1.03846
TCGGACATGCGTCTTGGGAC	27	1.03846
CAAAAAGAAGGTGAAGTACT	27	1.03846
TCACCTTCTTTTTGTTGTCT	27	1.03846
AGGAATTACCTTGTAACAGA	27	1.03846
AGTAACCATGTAGCGCGAAC	27	1.03846
GGCTTTTTGTGAGGCTGATC	27	1.03846
TATATCCATGTATGGCTCTA	27	1.03846
CCCTGCATCTTATCTTGCCC	27	1.03846
TAATGCACCTGGGGTGTTTA	27	1.03846
TTAGAAGGGTTTTACATTAG	27	1.03846
TATCAGATTCTGGATAGAGT	27	1.03846
AACAAAACTGGTGCCCCCCA	27	1.03846
GTGGGGGGCACCAGTTTTGT	27	1.03846
GTTCAAGAAGTTCAAAGTGA	27	1.03846
TTGAGAGAAACTGGGACTGG	27	1.03846
CCAGACTCTACTGGGGAAAA	27	1.03846
CCTGTGTTCGAGAAATACAA	27	1.03846
ACAGCTTGGCGACTCTGTTG	27	1.03846
TTTTAGTTGTCTGTGATAGT	27	1.03846
GAAGAGGGTCTTTGACAGAA	27	1.03846
TTGACCGCCAAGATGGAAGA	27	1.03846
AGTGCAGAAGTTGTACAACT	27	1.03846
AACCTCATGAGGGCTGTCTT	27	1.03846
TCCGTTGTTGGAAAGAGAAT	27	1.03846
TCATAGTTCTGGTGCATTTG	27	1.03846
GAAAAAAGAACCAACTCATT	27	1.03846
CTTGAAAATTGAAGGAGTTA	27	1.03846
AACCAATCTCATACCTACTT	27	1.03846
CTTTGTTTGTTATATCTCCA	27	1.03846
TCCCTTATCCATAGCCTGCA	27	1.03846
CACTTCAGTTTTATGCTAAT	27	1.03846
TCCTTTAATGGAAAGAGAGT	27	1.03846
GATTCACAGCTTCTTGTCTA	27	1.03846
AAAGCTTGATGAAGCAGAAT	27	1.03846
AAGGTGAATTGGTGATGGGG	27	1.03846
GTCCGACGAAGGATCAGAGG	27	1.03846
TGCTAATGAGTGTCCGACGA	27	1.03846
ATGGTTCCTAAGTCCTCTTT	27	1.03846
CAGCAGAGTCGCCATTCTGT	27	1.03846
CAAGGGTGAAAGTGAGAATT	27	1.03846
CAAACAGAAGTCAAATTCTT	27	1.03846
AGCTTCGGCCAAATCATTCC	27	1.03846
TGCCAGATCTCTCCATTTCT	27	1.03846
TCTTTCTTAACAACCGCTAG	27	1.03846
TGGCTTCTCTGAAAGACGCT	27	1.03846
GGCTTCTCTGAAAGACGCTA	27	1.03846
GTTTCACTTCAGAGGCTCAA	27	1.03846
TCTCAAGCAGCTTGTGTAGA	27	1.03846
GTATTCTTTGATCTTGTCGA	27	1.03846
ACTGTCAAGTACATAATCAG	27	1.03846
AACTGTCAAGTACATAATCA	27	1.03846
CAGTTCTAGAGAACTCAATG	27	1.03846
AATTAAAGGAAGTGTACTAG	27	1.03846
AATCACCAGTCTGGTACACC	27	1.03846
TTTGAAAGTGGCCTATGAAC	27	1.03846
GTTTTAACATGACTATACTG	27	1.03846
ACTCATATCATCAGATACTC	27	1.03846
TTTCCCCAGCTTCTTCAAGG	27	1.03846
CATTTCTTCATTATTGGCCT	27	1.03846
CTTTTGGAATACGCATGCCA	27	1.03846
CCACAATTGAAGAAGCCACA	27	1.03846
GCGCCTGTTCCCATCAAGGC	27	1.03846
CGCCTGTTCCCATCAAGGCT	27	1.03846
CTAGGACTCTCAGGCAAGGG	27	1.03846
GGACCCTGTCGACATCAATA	27	1.03846
ATCGGTTGACCTAACGAAGT	27	1.03846
GAATAACAAAGGGCAAATTT	27	1.03846
GTAATGCAATGCCTCTGTTT	27	1.03846
CCCCAAAAGTCATATATGAC	27	1.03846
CCTGTCATATATGACTTTTG	27	1.03846
ACCTGTCATATATGACTTTT	27	1.03846
ATACATAAGGTGAAGGCAGA	27	1.03846
CCCAAGGGTTATCTTGATCA	27	1.03846
GTGTGCCGCTGCTTTACAAA	27	1.03846
CTCCTGTCCACAGACCCATT	27	1.03846
AGTATTCTGTTGAAAGCGGT	27	1.03846
ATCAACTGCTCCTTGACCTG	27	1.03846
GAAGGAAAGGAAGCAAAAGA	27	1.03846
GTTTGAAAAACTCAGGATTT	27	1.03846
GGGAAATCAAATGAAGAACC	27	1.03846
AGCTCAGAATTTGGGACATG	27	1.03846
ATGTTCTAATGATGTGGAGA	27	1.03846
GAATGGTGAGTTTTCATTGG	27	1.03846
TGCAGAGCCCTCAGATACAA	27	1.03846
GTATGACAAAGATAAAGACA	27	1.03846
GAACTATAAAAAGTGAGGTG	27	1.03846
TGTGTGAACTATAAAAAGTG	27	1.03846
TTCTTCTTCAGCTTCAAATA	27	1.03846
TCAACTGTAAACACATGTGT	27	1.03846
GTACTGATCTCTGATGACTG	27	1.03846
TCCTTTCCCTCAGCAGAGTC	27	1.03846
AGTTCATCCCAAAAACCAAA	27	1.03846
TTGGTTTTTGGGATGAACTT	27	1.03846
TGCAATTGAAGGCTTTTTGA	27	1.03846
TGAAATCTGTTTTGGGGTCT	27	1.03846
GGTCTTGGCTATGAGGCTTG	27	1.03846
GATGCACAACTGAGCCCCTT	27	1.03846
ATTGAAGTGGGGGAGGAAAT	27	1.03846
GTTGTTTCAGTTGTATATCC	27	1.03846
TTCTTCTGGAAGTGTTGATT	27	1.03846
TTATTTGTTGATGTTTCCCC	27	1.03846
TTTCTTCTTTTCGAGCAAGA	27	1.03846
CTTTCTTCTTTTCGAGCAAG	27	1.03846
AATGTTGTATATGGTCAAAG	27	1.03846
AAGATATTCTTGATGGAGAT	27	1.03846
AAAGATATTCTTGATGGAGA	27	1.03846
CTGTTGCCTTAGCCACTGCC	27	1.03846
GGGGGTTAGTTATGCAGAGA	27	1.03846
GAACATCTGACCCAAGATAT	27	1.03846
ATATCTTGGGTCAGATGTTC	27	1.03846
CCAAGATATAGGTTGACTCA	27	1.03846
CATGAGTCAACCTATATCTT	27	1.03846
AATCTCCCTGAGGACTCCGT	27	1.03846
TTTTATGCAAAAGGCTTATG	27	1.03846
GTCAACCAATACAAAGGCAA	27	1.03846
GATTGGGTGGAAAAATAGGG	27	1.03846
TTTTTGCATAGATTTCCTCT	27	1.03846
TGTTATCAGTGACTCGTGTT	27	1.03846
ATGTTATCAGTGACTCGTGT	27	1.03846
CCATCATTCTTCAATCCGAA	27	1.03846
TGAACATGAGACAGCGGAGA	27	1.03846
GTCCGTATCATATTCTGGAG	27	1.03846
CGTGAAGAAATCCATTCTTT	27	1.03846
AAGTCAGGAATCGTTTAGAA	27	1.03846
TCAGAAGTTACGTGCTAGCT	27	1.03846
TCAGAAGATGAAGATGAATC	27	1.03846
TAAGAGCAATATTCTGAGTC	27	1.03846
TCAAGTCAATCCAATTGGCA	27	1.03846
CCTTTGCTCTTTTCACGTAC	27	1.03846
CCAGTACGTGAAAAGAGCAA	27	1.03846
GAGAACTCCGTGCTAGGTGA	27	1.03846
AATGAGTGGATACGAATGGA	27	1.03846
ATACTTGAATACACGCCATC	27	1.03846
TTCTTTGTTTATGTTACCCC	27	1.03846
GTTTATTTCTCAGGGTTTTA	27	1.03846
ATGTCCTTGGTGCTCTCAAA	27	1.03846
TGCACGCCTCTGAATCATGA	27	1.03846
ATTGCTGGGATGGACCCAAA	27	1.03846
TTTGGGTTTTCCCTTGTTCG	27	1.03846
CATAACCAAGCAATGGAAAT	27	1.03846
AAGGCATTATGTGTTAGGGG	27	1.03846
AGGCATTATGTGTTAGGGGT	27	1.03846
TGAGCACTTGAGAATGGTAT	27	1.03846
GATCACGTCTTCTATAGATA	27	1.03846
ATCACGTCTTCTATAGATAT	27	1.03846
TGGTTTCTGAGATTTTTCTC	27	1.03846
AGAAAAGAAGATCAAGATTG	27	1.03846
TTGAGCATTAAGTCTCCGTT	27	1.03846
CGAGAAAGAGCAAAAGCGAA	27	1.03846
GGAGTACCCGCAATCTGCTG	27	1.03846
ACGAAAACAGTCAGCCTCCA	27	1.03846
GTACCATGAGACTCTGTGTC	27	1.03846
TGTTCAGTAGAGAATTCCTA	27	1.03846
CAACCGACGATGCCCCTTCT	27	1.03846
CACCAGAACAACGACTCTCT	27	1.03846
TCCCAACATCGAAGGTTTCA	27	1.03846
GAGTTCCTAGAGTTGAAACA	27	1.03846
ACTTGATTAAAGCTAAGGAA	27	1.03846
TTATCGAGCTTTCACTTTTT	27	1.03846
GGACTCACCCTGACATGGCT	27	1.03846
AGTACTCGAAGAAGAAATGT	27	1.03846
AGATATTGTTTGCATACTCT	27	1.03846
GAAGAGCGAATTCTTTAGCA	27	1.03846
AATGTATATGGGTAATGGAC	27	1.03846
TGCTGCTGAAACAGACGCAC	27	1.03846
AGCAGTGGAAGATAAGCAAG	27	1.03846
CCCCACGCGCGAGGACGACA	27	1.03846
CCCTGTCGTCCTCGCGCGTG	27	1.03846
GTCTCATTATGAATTGCAGC	27	1.03846
ATTAAGATGGTGAGGAGCGA	27	1.03846
TACACTCCATGACTTTTTAA	27	1.03846
GATCCATCAAGGCTCTGCTG	27	1.03846
TCTCCTCAGCAGAGCCTTGA	27	1.03846
TGCTGTTAGCTTTGGGAGGT	27	1.03846
AATCCTAGTAGCTAGTTTGA	27	1.03846
ATCCAGCATCCTATCTCTAC	27	1.03846
GGACATGGCTGTTTTTCTAG	27	1.03846
AGTGCCCCATGATGGTTCCA	27	1.03846
AAAACATATGGGTACTGTAC	27	1.03846
CATGTTTCATAGGTCAAATA	27	1.03846
GACACATTCAAAATCCATCT	27	1.03846
TCCCTTGAGCTCTCTATAAA	27	1.03846
GGAGAATTGGAGTGGAAGAT	27	1.03846
ACATTTCAGCAAATTGTCAA	27	1.03846
TTGAGTTTGAACCGGAGGAG	27	1.03846
CTTGTACGTTAACTTTCTGA	27	1.03846
CCTACATGGTTGACATTCTC	27	1.03846
GTAGGCATTAGTTGATAGTC	27	1.03846
TAAATCAGACAACGATTGCT	27	1.03846
TGAACCCGTAAACTCTTTGA	27	1.03846
ACTTCATGTTGAGCACAAAG	27	1.03846
CAGCGTGTCTTGGTGGATGA	27	1.03846
GTCGATATGGAGCTCGCTGA	27	1.03846
TGGTTGAATGTGAGTGGGGG	27	1.03846
TGAGATTTTGGGCATAGTGA	27	1.03846
TTCCTTTCTCCTTCTGATTC	27	1.03846
CTCCCTTCAAGGTATGGTAA	27	1.03846
GTGCCTCTCATGGGTGCAAA	27	1.03846
ATGGATCGACATAAACAAGG	27	1.03846
CAAGAATTATATCTGATGGA	27	1.03846
TGCAAATGTTTGTTCTCTTT	27	1.03846
ATAGAGAAAGAAGAGAAAGA	27	1.03846
CGCGTAAAATACACAGAAAG	27	1.03846
TGAAGTACTTTGATGGCAAA	27	1.03846
ATGATAGAGCCAGAAACATC	27	1.03846
CTGGAGTAAATTCTGGATCT	27	1.03846
GAATGCTTGTTGGTGTGCTT	27	1.03846
AATGCTTGTTGGTGTGCTTG	27	1.03846
AGGATGGACACGTGTCATTT	27	1.03846
GTGATAAAATGTGACACCCT	27	1.03846
CCCCTTTGAGCCTTTGAAGT	27	1.03846
GCAAAGCCATACTGAGCAAA	27	1.03846
GTCAGACAGCAAGCAAACGC	27	1.03846
TGACTGTTTTGTGACAGGCT	27	1.03846
CACAGATTTGTACCTTTATG	27	1.03846
TCTTCTGAGATGATAACAAA	27	1.03846
CTGATTCTCTAATCATTAAC	27	1.03846
GAAAGTCTCCATGACCTGCT	27	1.03846
TGGACTTGAACCCACGCCCT	27	1.03846
GACCATGTAGTATAGCTTAT	27	1.03846
CTTGATGAAAGTGCTAGAAC	27	1.03846
GCATCGAATGCGTTGGGACA	27	1.03846
AAAACCTAAAAAGGCGACTC	27	1.03846
GGCTGAAACTCACGAGAAAA	27	1.03846
GGAAGATAGTGAACTACCCG	27	1.03846
CACATGCCTCTGAATCGTGA	27	1.03846
CGAGGCTAGGCAGAAAAGAA	27	1.03846
GGAACATGAGCTTCATCCAA	27	1.03846
GGTGTGATAGTTTGAGAGAA	27	1.03846
AAGAAATTGTCAACTCTTCT	27	1.03846
AAAGAAATTGTCAACTCTTC	27	1.03846
AAACAAAACTTCCCCTTTTA	27	1.03846
TTCCGCAGTCTTCAGGCGCG	27	1.03846
AGAAGTCCTTTAGAGGTTGG	27	1.03846
GTTAGAAGTCCTTTAGAGGT	27	1.03846
TGAATACTCATCCTTAGGTG	27	1.03846
AGATTTTAGAGATCTGAATC	27	1.03846
TTTTCAACCCACTTTTTCTG	27	1.03846
TACAGGCAGAATTGCCTAGA	27	1.03846
AATCTGAATGTGGTTGGTGT	27	1.03846
TGGGTGGTAGCCTCGGCGGA	27	1.03846
GAAACAACGAAATAAACTAC	27	1.03846
GATTTATGAATCCAAGTCTT	27	1.03846
TACCGTTTTATGAACACTAC	27	1.03846
AGGATGGAAGTAAGAGATGT	27	1.03846
AGAGTCATAGTATATAACAG	27	1.03846
ACAACTCTTGCAATCACTCA	27	1.03846
GGTAAGGGTTAGATCAATCA	27	1.03846
TGAAAGAGGTTCGGAACAAG	27	1.03846
CCAATGAAGCACCATGCATA	27	1.03846
CCTTATGCATGGTGCTTCAT	27	1.03846
TGATGATGCTCTAGCTGCTA	27	1.03846
GGCATATTATAGGAAGATGT	27	1.03846
AAAGAAAATGGAATCTTCCT	27	1.03846
GAAAATGTTACAAATGACTC	27	1.03846
GTGTACCGTCAATTATGAGT	27	1.03846
GGCAGAGGAAGCCCAAGCTA	27	1.03846
AGGCAGAGGAAGCCCAAGCT	27	1.03846
ATCTCACCCAGAGTTAGAGC	27	1.03846
CATCTCACAAAGCTCCTTTT	27	1.03846
TGCTAAGTCTCATACTGAAG	27	1.03846
TGACTGGAAGGGTTGCTCGT	27	1.03846
CTCACTATAAAGCAACCGAA	27	1.03846
TTCAGAATAAACCGTCCACT	27	1.03846
TTCAGATATAATCCATACGA	27	1.03846
ACTCAAGGGTCAGTCAAGCT	27	1.03846
TGGTCACGCACTAGTTGTTA	27	1.03846
GCAGTTTTGGTGATTTGGAG	27	1.03846
GCTTTTGGGATAGTTCAAGT	27	1.03846
TTTGGGGTCAGTTGGATTTT	27	1.03846
GCACAGAAGATCAAACAAAA	27	1.03846
GACGCCATTCAGTATGGGCT	27	1.03846
ATCTTCTCAAGATCATCCAT	27	1.03846
GGCTTTTTGAAGGGTGTAAG	27	1.03846
GTAAGAGGCCTTAACATTAT	27	1.03846
TAACAAACATGGGCTGTTAG	27	1.03846
AAAACATGTCAGGTGCAAAT	27	1.03846
AATATCTAGGAACAAAGCTT	27	1.03846
CCACATGTCAGAAGGGCCGC	27	1.03846
TCTGGGTGAACTTGAGACTC	27	1.03846
GACATAACATGTTGATATGT	27	1.03846
CTTTCTTACCCCCAGGGTAA	27	1.03846
TGTGGAGCACATAGCCTTTC	27	1.03846
GGAGGATGAAGAACAAAGAT	27	1.03846
TTTGCAGAGAGAATTGGGAA	27	1.03846
AAACGATCATGAATCATTCA	27	1.03846
TTGAGGCTTTTGAGTATAAG	27	1.03846
ATTCCCTTGATCTTAACCTT	27	1.03846
TTCCCTTGATCTTAACCTTA	27	1.03846
AGACTCTGAGTCATCCCACG	27	1.03846
AGCAACAAAAGGGAGGGCGC	27	1.03846
TTTTTGACTCTTTGGATTTG	27	1.03846
TTCTTGTTCTTTGAGCTCTT	27	1.03846
GGTGTTCAGGGATATATTCT	27	1.03846
GGGAAGCCACTTGATTTTAA	27	1.03846
TCCTAGGTACTAGGAGATCG	27	1.03846
GAGTTTCGTGATTCCGAATG	27	1.03846
CATCACTAATCATGCCATAT	27	1.03846
TATCTTTTCCAAGTCGCAAC	27	1.03846
TGTTGTTTTTAATTCCGCTG	27	1.03846
CGTGACAGAACTTGGTATTT	27	1.03846
AGGTCTGGACGATTGCCCCT	27	1.03846
ATGAAACCAATCGCTGGTGT	27	1.03846
TCCCTTTCCTCGAGTTTCAG	27	1.03846
GGTCTGGATTTCGAAAGTTT	27	1.03846
AGTCTTGATCTTCGAGCTAG	27	1.03846
AACCCTTAACTTTTTTAACC	27	1.03846
TAACTTTTTTAACCTGGGGC	27	1.03846
TCAATCTGACCATCTGTCTG	27	1.03846
AAATCCCAGGGAGCGACAGC	27	1.03846
ATATCTATGGACTTTGTTTC	27	1.03846
TCATCCCCCGCTACATCACG	27	1.03846
GAGTTTTGAAATGAGCATGA	27	1.03846
TGGTCATAGTGAGGCTAGGA	27	1.03846
GGTTTGAAGGGTTACATGTT	27	1.03846
ACACATGTTCTGGCCAGGCT	27	1.03846
GGATGTCTTTAATATGTTGT	27	1.03846
GCGCACACACGGCTTTCTCT	27	1.03846
GCTGGTAAACTTTTTTGCTT	27	1.03846
ACTTTTGGTATAGCACACAT	27	1.03846
GTGTGCCTTTGTTGTTTAAA	27	1.03846
ATAGTGGAGTTGGAACCCAA	27	1.03846
GATACGCAGTTTTCTTAGGT	27	1.03846
ATTTGATGGACCAGTTGGTT	27	1.03846
TGTTTGAGGGATATGATAGA	27	1.03846
GCCCTTTAGTTACATTTGCC	27	1.03846
AGAAGAGTTAGCAAAGGCGA	27	1.03846
GGCGTCCCGGCGAACCACTG	27	1.03846
TGGAGTTCTTATGTTCTGTG	27	1.03846
TTGTTCATAACACATGCTAA	27	1.03846
AGAAGGTTTGTTCAGGGTTT	27	1.03846
AAATATGGTGTGTATGGCTC	27	1.03846
ACAACACTGCAAAGGGTTCG	27	1.03846
CGAACCCTTTGCAGTGTTGT	27	1.03846
GGAAACATCCCTTCATTAAC	27	1.03846
GACTACGTTGTCTCATGTCT	27	1.03846
ATGATTTAGCAAGGGCAAAG	27	1.03846
TGAAGTTTGAGGACTGTGAC	27	1.03846
TACTCAACAATGTATGCATG	27	1.03846
GACTACCAGTGAGGACAACT	27	1.03846
GCCACTTCTTGTACATTTCG	27	1.03846
ACGAATGGTCCTTCATATGT	27	1.03846
ACACATAGTCAACGGCAACA	27	1.03846
ACCGTCATGCCACCTTTCTT	27	1.03846
AACCAGACGTCCTTCTCTGA	27	1.03846
GTTCTTAGATACAGTTTGAT	27	1.03846
AGTCAAACAATTAATGTTGC	27	1.03846
TGTTGGGTCTGGAATTGGTT	27	1.03846
TTCGCCGGGAATTCTCTCTA	27	1.03846
ATTCGCCGGGAATTCTCTCT	27	1.03846
GCATGACGTCCAACAATCAG	27	1.03846
AGAATTTGAAATGAGCGTGA	27	1.03846
AGAGCATGCAATCGATTGCA	27	1.03846
TAAGGGAGATTTTGAGATTT	27	1.03846
TGCATCAAAATTGTCTTGAG	27	1.03846
TATATCCCTTAGCCTCGTCC	27	1.03846
CCTTTTGTCTTGAAGAATGC	27	1.03846
ATTCTTGGAGTTGGAATCGT	27	1.03846
GTCTAGATGAGATGAGTTGT	27	1.03846
TTGCGGCTTCAGCTGATTTT	27	1.03846
CTTGCGGCTTCAGCTGATTT	27	1.03846
CTTTCTCTGGTTAACGATTG	27	1.03846
CTAGGGGTTGAAGAAGAAGA	27	1.03846
TGTAAACTGTCATGGTTTTG	27	1.03846
TGCTATCACCTATGGGCGCC	27	1.03846
CACATGTGGGGAAATTACAA	27	1.03846
GTGGTATAATTTTGGGGTTT	27	1.03846
GTATCAACCGATCAGACCCG	27	1.03846
AAGTTGGACACAAGATGAAA	27	1.03846
GTATGGATGTAATTGTAATC	27	1.03846
TTGGGATGATTGTTAGGTGT	27	1.03846
TTCTTTTTGGTCTTGGACTT	27	1.03846
GAATGACAACTCAAGGGGAA	27	1.03846
AGTTCCTCACTAACTCTGCA	27	1.03846
GTGAAAGAAGTAAAGCCATT	27	1.03846
GGAACGCCTCAAAACCAAGC	27	1.03846
TCTTCTTGCATGTTTGCTTT	27	1.03846
TAAAACTTCCTAGTGTCTAG	27	1.03846
CTAAGGTTTACCTGCAAGAC	27	1.03846
TTCCTGTCCGCAGACCCATT	27	1.03846
AACCAAATGGGTCTGCGGAC	27	1.03846
TTATCTGAGTTATAAGGCAT	27	1.03846
GAAGGTAGAATAAGAAGCAT	27	1.03846
GACGATGAGTTTCGTGCCTT	27	1.03846
AAGAGAACCTTGTCTGGGCG	27	1.03846
CGCCCAGACAAGGTTCTCTT	27	1.03846
CTGATTATCATGCCCCTGAT	27	1.03846
AAGGACTATTCAGTTGTTAG	27	1.03846
TGCCGGTGAGAGTATGACTT	27	1.03846
ATTTTAAGGCAATGTTCTGT	27	1.03846
CAATGTTCTGTTGGGAGTTT	27	1.03846
AATGTTCTGTTGGGAGTTTT	27	1.03846
TCCCTTTCACCAGAATGCTC	27	1.03846
GAGACTATTTCACAAGGAAA	27	1.03846
GCGCGCAGATTCTTCCACAG	27	1.03846
GATAGAATTGAGATCTTGGA	27	1.03846
AGTTGGTGTACGTTTCTCCC	27	1.03846
CTCAGTGAATAACTCAGAGT	27	1.03846
CGACTCCCTTAACCATCTCT	27	1.03846
TGCGCAACTGAAGCGTGTTA	27	1.03846
ACTTCGAGTTCTAGCATTCT	27	1.03846
AAGCTCACATGGCCAATTAA	27	1.03846
TGTTTGCTTATGCCTGATTA	27	1.03846
GTGCATATGAGGGGTCATTT	27	1.03846
TGAGGGGTCATTTTGGGTTC	27	1.03846
GGGTTCTGGTGTGAATTGGT	27	1.03846
AAGGTTCGGCATCACCAGCA	27	1.03846
TCCCATTTCCTTCCAGTGCT	27	1.03846
ACAACATCCAAGCCAGCCAA	27	1.03846
CTGGTGAAGGTTGGAAGCAC	27	1.03846
GGAGGCAACTGTTAGAAGAC	27	1.03846
CCTCTGTCTATGCTTGTAAA	27	1.03846
CTTCTTTATATCACTTGCTG	27	1.03846
GGAGACTTAAAAGAGTATGA	27	1.03846
GACGTGTCGATTGAATTGTT	27	1.03846
GACATGTTTCATGTGTTATA	27	1.03846
GTCAAACAAGGCTAAGATGT	27	1.03846
AAAGTGGATATGTGAGCTGG	27	1.03846
ATAGGACTGTTTGGTGACTA	27	1.03846
CTTTCCTTGCCAAAGCACGA	27	1.03846
TCATCTTCCTCCTCTCTCAG	27	1.03846
GACCTCTTTCATCACGCCCT	27	1.03846
TATTTCCGCTAATTGTCAAG	27	1.03846
ATATTTCCGCTAATTGTCAA	27	1.03846
CATATTTCCGCTAATTGTCA	27	1.03846
AATTGTTGTCTATTCCTGAG	27	1.03846
CTCCCTTCAAAGTACGGTAG	27	1.03846
GTGGATTAAAGGTAAAGTTT	27	1.03846
TGATTCTGATTGGTTTGTAT	27	1.03846
TTCCATATTCGGGGGACTTA	27	1.03846
CAATGATTAAGGCTTTCATA	27	1.03846
TTTGTACTGAGCCGTCCATT	27	1.03846
GCTTGTGTTTTGGAGCAGGG	27	1.03846
TCTCAGATGAGCAGTGGGTC	27	1.03846
AATATATCACATGTGAGGTG	27	1.03846
CAGGCCTGGTTTTTGGGTCT	27	1.03846
AGGCCTGGTTTTTGGGTCTA	27	1.03846
TGCCAATGTTACTAAGCAAG	27	1.03846
TTGATCTTTTCTGACATGTC	27	1.03846
TGGACCAGTTATGTTTTTGA	27	1.03846
TCGAAGAACAAGACCAGATA	27	1.03846
AAGGTTTAAATGCGATCCGC	27	1.03846
GTTTCGACGTAGACCAACAA	27	1.03846
GGCTTGACCCATTAGAGGTT	27	1.03846
GCTCCTTTCGCTCAGCGCCC	27	1.03846
TTAAGAGGATTGGCAGCTGT	27	1.03846
AGGTATGGAAACATGTTTTA	27	1.03846
AGAATGACCCAATCTCCTAA	27	1.03846
AAGAATGACCCAATCTCCTA	27	1.03846
CAAATCACCTCAGAATCATG	27	1.03846
CACCTTTTGGTGATAACACA	27	1.03846
TCCGTTTTTTGGGAAACAAA	27	1.03846
GCTAAGATGTCAATTGTTGC	27	1.03846
CTTAAGTTGTCTATTATGGG	27	1.03846
TTCGCGGTGGCGGCATATTC	27	1.03846
GCGTAAAAACACAGAGAAAG	27	1.03846
ACAAGGGAAAGCTTCACTTT	27	1.03846
ACGTATCTTTTCCGTTGTCT	27	1.03846
AGGAAGTCTCCAATGTGAGA	27	1.03846
AAAACTGGGAATACCTCCTT	27	1.03846
AGCTCTGATACCAACTGAAG	27	1.03846
AAGGATTTAGCAAGGGCATC	27	1.03846
TTGATTGGAAGACTCTGTAG	27	1.03846
GAAAGAATGTAACAATCCGC	27	1.03846
AAATAATCGAGACTCTACTG	27	1.03846
GTTTATGAACGAAAGGATAT	27	1.03846
GCTAAAAGGTATGAGGTGCC	27	1.03846
ATCGGGTCCCTATCAGATTT	27	1.03846
TGATTTTACCCCTGGTGATT	27	1.03846
TTGATTTTACCCCTGGTGAT	27	1.03846
TTGTCTGGTTGGGGAGCTGC	27	1.03846
AAAAGGGTAATTCTGGAAAT	27	1.03846
GTGAGAGTGTGGTTTTAGGA	27	1.03846
TCAATCGGAGACGAGTCGAT	27	1.03846
TTGGTCATTGACCTAATCAG	27	1.03846
ATTTGGTCATTGACCTAATC	27	1.03846
GGCATTTCATTCCGTTGTCT	27	1.03846
TGCTCAGATCCAAACAGCAC	27	1.03846
CTGTTTGGATCTGAGCAGCT	27	1.03846
AAGCTCTAGACAACAAGGCT	27	1.03846
ACTTCAGTACGCACCTCAAC	27	1.03846
TCCATCAAATCGTCTATTCT	27	1.03846
TCCATTTCAAATATGGTGAT	27	1.03846
CAAGAAAATCTTGCAAAAGA	27	1.03846
GAGGCTGAATACATTGCAGC	27	1.03846
TAGGAGGCAATCTCATCTCA	27	1.03846
CTGACTTAACTCGGATCTGA	27	1.03846
AGAGAGAGTAATATGAGGAT	27	1.03846
GAGAGAGTAATATGAGGATT	27	1.03846
AAAGAAAGAAGGAAAAGGGA	27	1.03846
GCAACAACAACCACAACAAT	27	1.03846
ACCCGTCGACATTTAAGGGG	27	1.03846
GTTGGTGAAGCAAAACTAGG	27	1.03846
AACCTTTAATCTATCAACCA	27	1.03846
TCATTGCTTGGTTTCCTCAA	27	1.03846
GAGTAACTTTAAATCTACCA	27	1.03846
GCTTGTGTTATTGAGCAAGG	27	1.03846
TGTGACTGGTTTGCCGAAGA	27	1.03846
GCACCGTATGAAGCGTTGTA	27	1.03846
TTGTAGTATGCAGACAAATC	27	1.03846
TTGGATACAATCAAACTCCA	27	1.03846
GTCACTTGGCCATTGGTTTA	27	1.03846
GAAAATGAGAAATTGGTGGA	27	1.03846
GTTTCTGTTTGGAAATGTTA	27	1.03846
TCGTGATTAGGGTTGTAATT	27	1.03846
TTCGTTTCTATTCTATGGGA	27	1.03846
ACCAACCAATGGATCGACGA	27	1.03846
TTCTTTATTCGCATCTTTGC	27	1.03846
GTCAAAGTGGAGGCCTTTTG	27	1.03846
GGACAAAGGGGAAGTCAAGT	27	1.03846
CCCCAACATGAACATGCAAC	27	1.03846
CCCCTGTTGCATGTTCATGT	27	1.03846
GTGGCGTGAACTTGCAGCAC	27	1.03846
GTAGTAGAAGGTGCCCCAAG	27	1.03846
TTGTTACCTTTCCCATCAGT	27	1.03846
AAGCATAATCTCGCGGTGAA	27	1.03846
GTGTACTGAGATACTGCTGG	27	1.03846
TCCCCGTGACGAGAATCAGA	27	1.03846
GTATGGTTGGTATATGTGAT	27	1.03846
CTTTGGATGACTGGAACAAA	27	1.03846
TGTATGATTGGGAGCCAAAT	27	1.03846
ACTTTTTTAGCTTGGTTAAC	27	1.03846
CTGGTGGGTTTTTGGTGGTA	27	1.03846
GAATTTCAATGATTTAGGCG	27	1.03846
CTTCGCAAGAGAACCAGGCT	27	1.03846
GAGTCTCCTGTGATCTGATA	27	1.03846
TATGATTGCCAAGTCTCAAA	27	1.03846
ACTTTCATGTCAAACCTCTT	27	1.03846
AGGGTTTAAATCCAACAATT	27	1.03846
CAATTTGGTCTGATTCGACC	27	1.03846
TGCTGCTGGGAACAATCACT	27	1.03846
AAAGCTGTTATAGGACAGTT	27	1.03846
AAACTGACAAAAAGAATCCA	27	1.03846
TAATGCTCATTTGGATCAAG	27	1.03846
AGCGTACACCTAACCTAGAT	27	1.03846
TAGCGTACACCTAACCTAGA	27	1.03846
AATGCAAAAGGTTTGAAGTT	27	1.03846
CTTTGGTATGGTTTTTGACA	27	1.03846
TTGTCAAGATTTGCAGCTAA	27	1.03846
AACAAGACGATCAAAGAACT	27	1.03846
ACTTCCAGTCCACCCGACCA	27	1.03846
ACATCTTCAGCTGGTTGGCA	27	1.03846
TATCAGCGCCAATATCGACA	27	1.03846
GGTGTGTAGAATGGAATGGA	27	1.03846
TGGGCGAATGGAAATTATTT	27	1.03846
CGGTTGGTAATGGTAACTCA	27	1.03846
CGAGACCCTGCTTGCTGCGC	27	1.03846
CCACTACATTCGCTTTACCT	27	1.03846
GCATACCGTTATTGTACAAG	27	1.03846
CAATGGATGCCTCGAGCCCT	27	1.03846
TTTACCGCACATTGACGTGT	27	1.03846
TTCATAAGTCTATGTGGTGA	27	1.03846
GAGTGGTGGGGTTATCAATG	27	1.03846
TGGGATAGTGGGCCTCCCTT	27	1.03846
ATCTATGGGTAACAGTCATC	27	1.03846
GGATTACAACCTTCTATGAG	27	1.03846
ATAGAGGTAAGCGCCCGAGG	27	1.03846
TTTGTACATCCATGGGAAAG	27	1.03846
CTCCAAGTTCACCCTTTGTT	27	1.03846
GATTAATCAACATTCTCCAA	27	1.03846
TCCGGATCTCGACGGGGATC	27	1.03846
GGTCATGTTGTTTCCAAAGG	27	1.03846
TTCTCAAGTTAGGATTATCT	27	1.03846
TGGTGCTGTTTGGGACTGGT	27	1.03846
TCCTGGCACTCGTGGCCGAC	27	1.03846
TCAGAACAAATCTTTTCTGT	27	1.03846
TGTTAGTCATCGAGGCATTG	27	1.03846
GTCCACCAGCACACGGGACA	27	1.03846
GCTGGTCCTTACAAGATGTG	27	1.03846
GGTGCTGTTTGGGACTGGTA	27	1.03846
ACAAAGTGGTGAATCAAAGG	27	1.03846
GAGAACGAAAAACCAATCTC	27	1.03846
GATTTCAAGTGGTGGAATTG	27	1.03846
TCAGTGAGGTGGCCGTATCC	27	1.03846
TTTTATGTAGAAGGCTTATG	27	1.03846
TGCATGAAGCAAGGTATGTT	27	1.03846
ATGCATGAAGCAAGGTATGT	27	1.03846
ATTGGTGATGGAGAGTTCAC	27	1.03846
TGTAAAGAAGAAAGAAGGGG	27	1.03846
GTGGGGTAGAAGAAGAGAAA	27	1.03846
CTCTGATATATATTATTCGC	27	1.03846
TAGACAATACCACTAGAGAG	27	1.03846
TTGGTGGAATGATTGCGGTG	27	1.03846
GTACTTGTTAAGGTAAGGCC	27	1.03846
GATACGAGGGTGCTTGGACG	27	1.03846
GGATCTAAACAAAGTCTCTT	27	1.03846
AGCAAGAGCAAGGAACCTAA	27	1.03846
TAAAATCCTCCGTTTGCGGC	27	1.03846
TGAAATGTGTTGGCTCCAAT	27	1.03846
AGTTATTCAGGCTATGGCGA	27	1.03846
GACAAGGCTTAGGGAAGTAT	27	1.03846
TAGAGTACCTTCAGTAAAGT	27	1.03846
AATCACTTGGCGTAGGACCA	27	1.03846
GGTTGTAAGGGATTTTGTTG	27	1.03846
CCCTTGGGCGCTTACCTATG	27	1.03846
CTTAGGCACGTGGCTGGATA	27	1.03846
TTGATGTAGGAATGGAGATT	27	1.03846
GTGGTGGGCAAGTGGAGATT	27	1.03846
TGTGGTGGGCAAGTGGAGAT	27	1.03846
TTAGAGGTGTGGTGGGCAAG	27	1.03846
AGGTTTGAAGGTGAAGTTTT	27	1.03846
TGGTGTTTGGGGTAAGGTTT	27	1.03846
AAACCAATTTCCTCCCACGG	27	1.03846
GCAAACAAAAACGTCGTAGC	27	1.03846
TTGTAGATTTTCAAGGTGAG	27	1.03846
CAAGGAGATTGAGGTTTACG	27	1.03846
TTCTACAGATTCTCAAGAAT	27	1.03846
ACCGGAGGACTGTGGGATAT	27	1.03846
GTTGATCACCTCTATGAGGC	27	1.03846
CTGCTTGACCAGCCTCATAG	27	1.03846
TTTCTTTGTTACGGGTAAGG	27	1.03846
CAGATGGAGGGAAGCGTTGG	27	1.03846
GTAAACAAAGGGGAACACAC	27	1.03846
TAGAGTCATGTATCCTTCTT	27	1.03846
GTTGAGTGCAAAATCTATTT	27	1.03846
GATGGTGTGATGAGATTCTC	27	1.03846
CACATAAACACATAGCAAAA	27	1.03846
ACAAATAACCCCCTCTTTTA	27	1.03846
TGTTTGTCTCATTTCGTGTG	27	1.03846
GATACATGCGCGCTGTGGCT	27	1.03846
CTAATCATGATTCTGACACG	27	1.03846
GTGCTTAATTGCTTATTTGT	27	1.03846
AGGCGCTCTGGGGGAAATAA	27	1.03846
AGGAGTCCAAGGCGCTCTGG	27	1.03846
TGCATCCCTCAGCAGATCGC	27	1.03846
AATATGGTACATGAAATGCT	27	1.03846
GTTTTCTAAGTTATGCCCAG	27	1.03846
TCTAGGGTTCACCTTCCAAA	27	1.03846
ACAGTATGAAATCGATTTGG	27	1.03846
GGGCTGCTGTGTGGATTGGG	27	1.03846
AACATCTTCATGATGAAGGG	27	1.03846
CATTTGACGTGTCATCTTAT	27	1.03846
TGAGTAGTGAATGTGGTGGA	27	1.03846
GGGTTAGGGATAGTTTTGGT	27	1.03846
AGGAAATTATTTTAGTGGCC	27	1.03846
TAACCAAGCAGCTAACCAAA	27	1.03846
TTCCGTTGATTTCTTGGAAT	27	1.03846
GATGAATTCCGTTGATTTCT	27	1.03846
GGGAACCGAGTTCCTTAAGT	27	1.03846
GTAGTGATCGACCTAATAGA	27	1.03846
CGAAATCACCACCATTACCC	27	1.03846
GCCTCCACCCATGTGGTTCC	27	1.03846
CAGGCCAGGAACCACATGGG	27	1.03846
AAAAGATTGAGAGACTTGAG	27	1.03846
TAATTCCCCAGCAATATCCA	27	1.03846
TATCACCATACCTCCGCTTA	27	1.03846
GGTAGAATTTGGGGGTTTTG	27	1.03846
ACACTCAACCTAAAAGAATC	27	1.03846
AATGGATGAGTGAGAACGAA	27	1.03846
ATCTTTTGAGCTCTTGATTG	27	1.03846
CGTTTGTGAAAAAGGATTTC	27	1.03846
GTTCTTCTATTATCTTCACA	27	1.03846
CGAAGGAAACACTCAAGTTA	27	1.03846
CATCATTGCCTCCAAGTGGT	27	1.03846
GCTAGCTTATGAATAATTGT	27	1.03846
ACTAACAAAAGTTTGGGAAT	27	1.03846
TTTAGCCGGTACTGCTGTGG	27	1.03846
GTCGCCAGAGCTTATCATTT	27	1.03846
GATCAAGCAGTTGTGTGGAA	27	1.03846
GAACTTGTACTTCCATTAAT	27	1.03846
GAGAGTAGATGTTACTGCCC	27	1.03846
GTCCAAGAGGTCAATCAGTC	27	1.03846
TGGGATAGCACATGCTAAAC	27	1.03846
ACCTGTGTTTACAGAAGTAT	27	1.03846
ACCAGCTTCTGTTTGGTATC	27	1.03846
GAAATTGTACGAGTTGAGTG	27	1.03846
GAAGAATTAGAGTTGTGTGT	27	1.03846
AGGGTATTTTGGCAGATTAT	27	1.03846
TTGATTGATATTGAGGTGGT	27	1.03846
ATCCAACAATCTTTCCTTTT	27	1.03846
CTGATGCCAAATGGTGGTTA	27	1.03846
AAGAAGACTGGACCAAACTC	27	1.03846
GAAGTGAGAGACTGAAGGAG	27	1.03846
GTGTTGAAGCAGATTGATGT	27	1.03846
TGATGCTATCAAAATCTTTC	27	1.03846
TATTCAGTGTGATTCACTAT	27	1.03846
CTTCGAAGGTCGTTGAGTCA	27	1.03846
AGCAGTAGAGGATGAACAAG	27	1.03846
TAGTTCGCGGCGCGAACAAG	27	1.03846
TCCAAAAATCGACGCATTCG	27	1.03846
AGGCTCAAGTCAACCCGGTA	27	1.03846
AGCTAAGGCTATTGTAGAGT	27	1.03846
ACAAGCTGCCCGCTCAGAGA	27	1.03846
TATACACAAGTGTTCTTGAC	27	1.03846
TGCTGGGAGTGAGTTGTCCA	27	1.03846
TTAAAATTCTTGAACCGGGT	27	1.03846
CGGTTAATCTGCTGTTGTTG	27	1.03846
TTGGCAGGCAATTTGTCTGG	27	1.03846
TGAAGTTCAAAGAAGAGTTT	27	1.03846
GTAGAAACAATAGTGCTCTG	27	1.03846
AAGACAACAGAGAAGGAATA	27	1.03846
TCTTCAGAAAGTTTTGTACG	27	1.03846
AGGTGTCTTGAAATGAGATG	27	1.03846
TTGACTGGAAGATTCTGCAG	27	1.03846
GTGTTCTTCCCAAGACACAG	27	1.03846
ACAGTTGAAGTCATCAATTT	27	1.03846
AAACACTGCATAAACCTAAG	27	1.03846
GAGTCGGTTACGCGAGAGGA	27	1.03846
GGATCATCTCTTTATTCATC	27	1.03846
AAAGATTTGGAATTTTCAGC	27	1.03846
ACAAGAACCGGGTTCTACCA	27	1.03846
AGAGATAATGGAGAGATTAG	27	1.03846
GTCGCTGCCCTTGCTAACGA	27	1.03846
AAACAATGCACATGAATGCA	27	1.03846
TCATAGATGCGGGTAGAAAA	27	1.03846
AAGAATTAGGGTTTGGGCCA	27	1.03846
TCTGAACGTGAAAAGAGTCA	27	1.03846
CTCTGAGGATAGAACTCAGT	27	1.03846
TTTACTTTTCCTGTCACAAT	27	1.03846
AGGTTGACTTTAATCAATCA	27	1.03846
TGTATGATAGACATAGAGGA	27	1.03846
GATGAGTGGTCATACGCGTA	27	1.03846
CACTTAAGTGAAATACAGTA	27	1.03846
TCATTATAAGGAAGCCCAAG	27	1.03846
AAAGTACAAGCCTCCAAAGT	27	1.03846
GTACGCGTATGGTACGCATA	27	1.03846
TTTTCCTAAGTATTTTTGGG	27	1.03846
CAGAAAAGGTGTGAAGTACT	27	1.03846
TCACACCTTTTCTGTTGTCT	27	1.03846
CGGTTAACGCATGCGAATTT	27	1.03846
AGATCTCATACAATCAAGCA	27	1.03846
GATGACAAATCAAGCTGCTC	27	1.03846
AGCTTTCCCTATCAAAAACT	27	1.03846
ATGGCTCTGGTACTCTCAAA	27	1.03846
GATTGATTCCCCTACAGAGT	27	1.03846
AGGTATATGATAAAGGTACG	27	1.03846
CATTCTTCTGGTGCTTGGAA	27	1.03846
ACGCATATGGGGGACTACCC	27	1.03846
GTTAGAAATTAAATGGGCTT	27	1.03846
ACTCAACAATTTCATGCATG	27	1.03846
ACCAGCTAAGTTTGACAAGA	27	1.03846
AATCAGGGGCAAGCCAACCG	27	1.03846
CTCAATTATGCAAATGCATG	27	1.03846
AGAGCTTCATCAATAGAAGT	27	1.03846
AAAGCAGTTAGTCAAAAAGA	27	1.03846
CATTACCTTCCTAGGTACCA	27	1.03846
CCATAGGACCCAACATTGCG	27	1.03846
GCTTGTGTTCTTTAGCAAGG	27	1.03846
CTACATCAGTGTATCCAGAA	27	1.03846
ATATCTAGGAAACACAGTTG	27	1.03846
TGGGGAACAGGGTCAATAAG	27	1.03846
TCCCTCTCGGAGCTGTATCT	27	1.03846
CGAAGTGAGCGGCAACTCCG	27	1.03846
CCTGAAGAAGATGATTCTTG	27	1.03846
ATGGACTAACAGGCCAAGGG	27	1.03846
TCTGGAAGGATGGACCGAGT	27	1.03846
GATGGGCATTTTTCCAAAGT	27	1.03846
ACAATCCAATAATCCCAATG	27	1.03846
ATAAACCCCATTGGGATTAT	27	1.03846
ACCGAATGAGGATGAAGTCG	27	1.03846
AAGGAGTCTCAACAACAAAA	27	1.03846
TAATAGCTCACACCTCCCTT	27	1.03846
TTGGTGCTCGTTTATCCGAT	27	1.03846
GCTGAGCGAAAGAAGGAATT	27	1.03846
GTGGGATGTGGAACCTTTGG	27	1.03846
TGAGCATGAACTTGTGCAAA	27	1.03846
TCAGCAGGCTGATCAGAGGA	27	1.03846
TGTAGATTGATGTTGTTGAA	27	1.03846
TAACACGTGTGAAGATGAAG	27	1.03846
AATACCGTGTCCTAAATAGT	27	1.03846
GCTTGATTTTACTGGTTTAC	27	1.03846
GCCGCCCTTAAATGGTACAT	27	1.03846
TGGAGGGTGAGAAAAGCGAA	27	1.03846
GTAGTAAATGTTGATAAGCT	27	1.03846
CCAACATTTCGACCAGCTTC	27	1.03846
CAACATTTCGACCAGCTTCG	27	1.03846
CCCGAAGCTGGTCGAAATGT	27	1.03846
CTATTCCAGAAGTACTACCT	27	1.03846
GGAAAGGTGATAGGAAGAAG	27	1.03846
GAAAGGTGATAGGAAGAAGT	27	1.03846
CAGGATTCAAAGGTCATGTT	27	1.03846
GGTTAAAATGAAAGGTCAGT	27	1.03846
AGAGAGTAACAAAGGGGGAA	27	1.03846
GCCTTTTATAGAGAGATTCA	27	1.03846
ATTATCCTTTGGCAGGAGCT	27	1.03846
TGATCCCAAGCTCCTGCCAA	27	1.03846
TGATGTTTTGGTCTTGTGTG	27	1.03846
CAAGCCAAAGGGTCAATTCT	27	1.03846
CCAGTTGATTTTTGAGGGTT	27	1.03846
CCTTACCTAGTTTGGATTGA	27	1.03846
GCAAAACAAGCAAAAAAGGG	27	1.03846
CTACCCTCTTCACACCACTT	27	1.03846
CTTGTGTTTATGTGAATGCT	27	1.03846
GAAGTATTCGAATGTTGTCT	27	1.03846
AATTATCTCTGAAATCGGCG	27	1.03846
TCTTCTTCGACTTGGTAAAC	27	1.03846
TCTGAGCTCTTCCTGCCCTT	27	1.03846
GGGTAGGTACAGGATTTCTC	27	1.03846
TCATGTGAAGCATTAAATGA	27	1.03846
TTGATGACAGATGGGTGATA	27	1.03846
GGTCTGTTTGAGACACTTTG	27	1.03846
TCCCCGACAGAGTCTTCAAA	27	1.03846
GGTTTAAGAGGTGACTTTGA	27	1.03846
TAGGCCAATTGTGAATGGTT	27	1.03846
ATGATTTGGTCATGTTTCAT	27	1.03846
CTTCCTACGTTGATCATTAT	27	1.03846
GAGGATGAAGATAAATATGT	27	1.03846
TCCATACTCAATTGTGTGCA	27	1.03846
CACTACCATCTCAAAGTTGC	27	1.03846
GACTATCATCATTTAACCGT	27	1.03846
GTTCAGTGTACAGGAGACTA	27	1.03846
AACTCTGAACCATCACTTTT	27	1.03846
CCGATGACTCGATGATCTTG	27	1.03846
GAGGGGTTTCGTGAAAATAT	27	1.03846
CTTTGCTGAGCGAATCTGCG	27	1.03846
GCAACGTGGCCCTAAGGTCA	27	1.03846
GCCAGTCTCAAGACCAAAAG	27	1.03846
GGAAAAAACACAGAGAGCAG	27	1.03846
AAGAAGAGGAAAAGGCACAA	27	1.03846
TGTCAATCAGTTAGAAGGCG	27	1.03846
ATGTGGCGAAGAGGAATACA	27	1.03846
ACTGGTGATTTCTTCGTATC	27	1.03846
TGATACCTTTTCGAAACCAG	27	1.03846
CTGTTAATTTCTCAAATACC	27	1.03846
AGGGATTTGAATGATATTTC	27	1.03846
CAACCAGAATTCATGAATAG	27	1.03846
TTGTCAATAGATGCCGCTGC	27	1.03846
CACGGACTCTTGTGGCTGAA	27	1.03846
GGCTATTTATAGGTGAGTTT	27	1.03846
ATCTAGGGATGCCGAATCTA	27	1.03846
CTCAGCTGGGATAAACTTGA	27	1.03846
TAGTGTTATTGCAGATTATC	27	1.03846
AAAAGGAACAGCTTCGAAAT	27	1.03846
GGCGCAAACGTGTCCCTTCG	27	1.03846
AATCAATTATGGGAATGAGC	27	1.03846
AGGAGGGTCCACTTGCACGA	27	1.03846
TGACTGTATGTCATTGGAAT	27	1.03846
CCGACATTTGAGAAACGAAA	27	1.03846
AATGAACCAACAATCCTAAA	27	1.03846
TCAACAACACGTGAATGTTG	27	1.03846
TCCAACACCCTTGGTGGTTT	27	1.03846
TCTAGTAGGTCATAGAAAAG	27	1.03846
CTTTCTTGGATTTCCCCAGA	27	1.03846
ACTTTCTTGGATTTCCCCAG	27	1.03846
ATAGCAACAAACATACATCA	27	1.03846
ATGGTTGGGATTCTGGCTTA	27	1.03846
GGATATACTCCTCCTACTGA	27	1.03846
AAAATTTCCTCCAGATGATC	27	1.03846
AATAAAAGGTCTGGGCGAGG	27	1.03846
CCCGCGAACGGCACCTCATT	27	1.03846
CTTAAACAGTTTTGCCATCA	27	1.03846
TTGGCTTCTGATAGTGAGTA	27	1.03846
AAATCCAGAGGGAAAATTTT	27	1.03846
TATGAGGCTAAGTGAGGTTT	27	1.03846
ACTACGTGGCCTGCACCCGT	27	1.03846
CTTCACTGGGGATAAACTCT	27	1.03846
AGAGGTCTTCCTTCCACTGG	27	1.03846
GAGAATTAAGAAGAGACCAA	27	1.03846
TCAGAGCTTGGAGCCATGTC	27	1.03846
GATTTGGCGGTAACGCCACC	27	1.03846
GAGCTCGAAGAGGGGCTCAT	27	1.03846
GAGACTTTTGATGATCGTCT	27	1.03846
TCTACAAATCGACGCAGTCG	27	1.03846
TCTCATGTGGTGCAGATGGA	27	1.03846
CGGTAAAATTGTGTGGTTAT	27	1.03846
GTATGCTCAATCAGTGTAAG	27	1.03846
TGGTGATTGAAAAAGCTCAA	27	1.03846
ACCTTCATCCAAACCAGGTA	27	1.03846
CCTTCATCCAAACCAGGTAA	27	1.03846
TCATCCAAACCAGGTAAGGG	27	1.03846
CCCTTACCTGGTTTGGATGA	27	1.03846
GTTGAAACAGTGAATTGATG	27	1.03846
AGAATAATATGACCGTCAAA	27	1.03846
CTTGCATATGTCAACATTAA	27	1.03846
CTTCCCGGTCGGTAAGATTT	27	1.03846
AAGATCAATTTCCAGATTAG	27	1.03846
TTTGAACAACGATTCACAAG	27	1.03846
ATCCTTATGCCTCCAGTACC	27	1.03846
AGTCGCCAGCTGAACACGGT	27	1.03846
CCTTGAATGTCCTATGTTTC	27	1.03846
GGCATGGTCTTAATCTGTTT	27	1.03846
GCATGGTCTTAATCTGTTTT	27	1.03846
AATCCCACCAAACCACTAAA	27	1.03846
ACTTGTTTCTTAGTTAAGCT	27	1.03846
TATTGCAAAGCATTTATGTC	27	1.03846
GTGTTATGCTTTAAAAGTTG	27	1.03846
CGATCATCTCCGCTACATCA	27	1.03846
CTCTTCTCATTCCCGCTTTC	27	1.03846
CCGTTGGTGGTATGCCCTCC	27	1.03846
AATCCCACCAGAATCCCAAC	27	1.03846
CATAGAACATTTCTCATGTT	27	1.03846
ATCGTAGTTCGCGCGAACTA	27	1.03846
TTAGTCGTTAGTTGTTAATG	27	1.03846
AAATCAAACGATCGACCACT	27	1.03846
AGTGATAGTGCAAGCCACAG	27	1.03846
CACTTGGTGTTGCACTGAAA	27	1.03846
AAGAACGTTACGAAGTGGGG	27	1.03846
ATACAGGTGAATATAACTGT	27	1.03846
TGAGGTATGAAGTGTATACA	27	1.03846
GTCATAGTGCTCATGTTTTG	27	1.03846
ATAGGTCAATTAGGGATGGT	27	1.03846
CAATGGTCGTCCTTCTACCG	27	1.03846
GTCAAATGAAAGGGTGAACT	27	1.03846
TTGTGCTCCGCCAAAGCACA	27	1.03846
TCCAGATTCAACAATGGCCT	27	1.03846
GCTTTACAGGTCAGTTGTGA	27	1.03846
GTGTGTTTCTTCAGAGGTTT	27	1.03846
AAGCATGTTGGTCATGGCTT	27	1.03846
AAGGGATTAATCCCTAAGAC	27	1.03846
ACTATTTTACCCCTGTCTTA	27	1.03846
GAGGCATGGTGAGGACTGTT	27	1.03846
ATTGCACCGACTTTTACTGA	27	1.03846
CATAAGTGACTTTGGGAAAT	27	1.03846
AGTGGAAATTCCTTCCTTGA	27	1.03846
TCGAGGTTTATTGAAGAAAG	27	1.03846
TTGATGTCTTGAGCAAGTTA	27	1.03846
GATGAATTTGAATGGTCTTT	27	1.03846
TATTGGTCCATATCAGGTTT	27	1.03846
ACCTCACGTATGAACCTGTT	27	1.03846
AAGGTGGTTCATGTTTTGGG	27	1.03846
AGGTGGTTCATGTTTTGGGT	27	1.03846
TGGGTCATTTGGAGCATGTT	27	1.03846
GGCAAAGGGAATCAAGGAGA	27	1.03846
GCAAAGGGAATCAAGGAGAT	27	1.03846
TGGAATCAGTGATGGAGCAT	27	1.03846
ATTGAAGCCAGAGTGTCCAC	27	1.03846
TTTGAGGAATTTGTGAAAAG	27	1.03846
TGTCCACACGTGGACAAGCT	27	1.03846
GAACCTAGCTTGTCCACGTG	27	1.03846
CAAAAAGACGTGGGTACCTA	27	1.03846
TAGTTCAAAGATAGAACTTG	27	1.03846
GTAAGTTGGAAGCTGGTTTA	27	1.03846
TAGAAGTGCGTACTGAGGTA	27	1.03846
ATAGGGGTGAGTCTAATATG	27	1.03846
TCTGTTGGAAAGGCTATTTG	27	1.03846
AATTTGGCTATAAAAAGCCT	27	1.03846
AAGATGAAGGGGAGATTTAG	27	1.03846
GTTGGGGCCAATTTCGAAAT	27	1.03846
ATTAGCATATTTAAGCAAGC	27	1.03846
TCCACAGACCCTCTGCAATA	27	1.03846
CCGGACACCCTGCTGGTTGG	27	1.03846
CCCCCAACCAGCAGGGTGTC	27	1.03846
CTCTGCGGGGAGTTGAAAGG	27	1.03846
GCACTCTGCGGGGAGTTGAA	27	1.03846
TTTGCGCGCAGATTTCACAT	27	1.03846
AATGTGAAATCTGCGCGCAA	27	1.03846
AAAGAAATGGTGGCCAAAGT	27	1.03846
GAGATATGTGGTATCCTTTC	27	1.03846
TTTGTATCTGAAGACTCTAC	27	1.03846
AGAATGCTAGCTCTGTTGGA	27	1.03846
CCGTTCATCTTGGGTCTGTA	27	1.03846
TGTGCACGCGGCGCGCAAGC	27	1.03846
TCATTTCCTTGAATTGGCCA	27	1.03846
TGGAAGCTGTTTTTGTAGTT	27	1.03846
GTGTGAAGCAAACTTGAGGA	27	1.03846
CACACGGCGTCACGAGCATG	27	1.03846
GCATGTCATATGAGGTATTT	27	1.03846
TAAGTCCTTGATGTTTTGAA	27	1.03846
GGGATCAAATCCCTAGGGGA	27	1.03846
CGATACGAGAATGATGTGTT	27	1.03846
ATCATCAGAGCCAAAGCATG	27	1.03846
ACTTGGAGTAATATTTGGAT	27	1.03846
AAGAGGATTTGGTTGGGTGA	27	1.03846
CCTTGAACCTTGGCCAACAA	27	1.03846
ACTTCCTTTTCGGTTTTTGG	27	1.03846
GGATATCACCAATGCGTGCC	27	1.03846
AGTTAGCTATCAACTCGGCT	27	1.03846
AATGGTCATTTTGGTGGTTT	27	1.03846
GAGATTTTTGGGCCGATGAT	27	1.03846
CCCTTAGAACATGCCTTTTG	27	1.03846
CCCCAAAAGGCATGTTCTAA	27	1.03846
GCGACCTTGCTGAGGATAAC	27	1.03846
TAGGTGCCGTTTTGCGGCGT	27	1.03846
ATCTTGGTTCAGATACAGAC	27	1.03846
GAAGCAGCTTCTACCCCACT	27	1.03846
TGGATTATTTGAAGTGAACT	27	1.03846
CATCGGGATGGGCATAAACA	27	1.03846
AATCCCAGTCTCCCGCCCTT	27	1.03846
ACCTTGCCCCACATCTCGGT	27	1.03846
AGCAAAACAGCCTCCTGGTT	27	1.03846
CAATTCAATGGGGTGTGTGT	27	1.03846
CTCATTGATGATGGTGAGAA	27	1.03846
TCATAGATGAAAGTGAGGTT	27	1.03846
GTTTGACAGACTTGGTATTT	27	1.03846
AGAGACTAGTTTGACAGACT	27	1.03846
AAGGCCTAAAGGAGGCCCAA	27	1.03846
GTTGCTAAAGCGCTTTGGAA	27	1.03846
ACCATTGGCTGGGTTAGATG	27	1.03846
TGATATGGACCAATGAAACA	27	1.03846
AGAAACCATTGTTCTAGAAA	27	1.03846
ACTTCCCTTTTCTAGAACAA	27	1.03846
TAATGCGCCAAGAGTGTTTA	27	1.03846
AATTCAAGGGAGCTATGGGT	27	1.03846
CAAATTCATGTGGTACCATT	27	1.03846
CAAACTCTGGAGCTGTTCAA	27	1.03846
GAAAAGCCAACTATTCCCTG	27	1.03846
GGGGGATGATCCTATGATGA	27	1.03846
TATGAGCTTAACAACTTTTG	27	1.03846
AAGGGTAGGCCAGAAAAGGC	27	1.03846
TATGTCGTAGGTGCAGTCTT	27	1.03846
TAACTGCTTCAGTTGTTCAC	27	1.03846
GCTGGCAACTCCACGTCAGG	27	1.03846
CGGGTTGTCAAAGTCATAGT	27	1.03846
GCAAGGTGCACGACTCTGCG	27	1.03846
AGAGAAAGAGACCAAAGGAG	27	1.03846
GAAAAACACATAGAAGGGGG	27	1.03846
TCTGACATTCTCACTGAGTC	27	1.03846
CTGATATGCTAAAGGCAGAA	27	1.03846
CGTTTGTTCAATCAGTTCAA	27	1.03846
AGAATTCGAAATGAACATGA	27	1.03846
CATTTTCCAATTTGGTTGAT	27	1.03846
CAAAGGAGGTGTTTTAAATG	27	1.03846
TTCAACCACCTGGAGTGCTC	27	1.03846
GGGGTACGATGCTGATCTTT	27	1.03846
CATCTCTTTGGCTTGCTGCG	27	1.03846
ACAATCAAACATTAGCCTGG	27	1.03846
GATTCTATGGGCTGCGTATT	27	1.03846
GACAAAGAAAAAGGAATGAA	27	1.03846
GGGAACATCAACATGGTTCA	27	1.03846
CGATTTTGAGAAATACAGAG	27	1.03846
ATTGGTACCTCGAGCGGATA	27	1.03846
AGGAGATCAACGGTTCAAAA	27	1.03846
GGATGTACATCCAGTCGATT	27	1.03846
AAAGGTCCGTACAGGGGTAT	27	1.03846
ACAAGTAGTGGATCCGCGAG	27	1.03846
TGCCGACGTTGCATCAATTA	27	1.03846
TGATTGGATGAAAATGTGAG	27	1.03846
ATTGGATGAAAATGTGAGTG	27	1.03846
GGCCTTGGCCGGTAAAGCTG	27	1.03846
TTAATCCCCAGCGATATCAG	27	1.03846
GCGCAAAGATACAAATGTTT	27	1.03846
TAAATCCTACACCTGGATTT	27	1.03846
TCAAGAAAGAGAGAGATGTT	27	1.03846
GCAATCAAGCGAGTTTCTTA	27	1.03846
TATGCCATGATACATTTTCA	27	1.03846
ATGCCATGATACATTTTCAA	27	1.03846
CTCCGGAGTCTTAAACTTCG	27	1.03846
AGAAACACCCTAGTCTCTTA	27	1.03846
AAAATTTCACTACCAACTCA	27	1.03846
GGGCAGGCGTCCTTTTTATT	27	1.03846
AGGCGTCCTTTTTATTCGGG	27	1.03846
TTCCTTTATCGATCAAAGTT	27	1.03846
TGATGGTTGGATCATCTTTA	27	1.03846
GTAACATGGCCTCGGTGTTA	27	1.03846
GCTTGGGATTTTCTGTATGC	27	1.03846
ATTTTGGTGAACTTTGGTGA	27	1.03846
GAGAAGAAGGAGATGAACAG	27	1.03846
GTAGGTGAGGAATAGCAAGT	27	1.03846
CACACATACGGCTTACTCTT	27	1.03846
GCACACATACGGCTTACTCT	27	1.03846
GAGTAAGCCGTATGTGTGCA	27	1.03846
TATTATATTTATGTCGCTGG	27	1.03846
GAAGAGCCACTTCCTGGAGA	27	1.03846
GTACTTGATTTGATCCATTT	27	1.03846
GCTAGTCATACGCGTATGGG	27	1.03846
TAGTTGATGACTTCAATAGA	27	1.03846
TGCAACACGTAATCTGCTAA	27	1.03846
ATTCAACTTGAATTACACCA	27	1.03846
GATGCCAGTGGCAGAAATGC	27	1.03846
ATCTGGGAATTCGAACTTCA	27	1.03846
CTGCGGGGAGTTTGAAACAG	27	1.03846
TTTTCATTCAAGCATTGGAA	27	1.03846
GACAGCTTGGCTACCTATGA	27	1.03846
TAGCAAAAACACCCCCTGGC	27	1.03846
CTGTTAACCGATTAACACCT	27	1.03846
TGGAGTTCATCCGGTGACTG	27	1.03846
TGAGGGCACCCGTACTCTGC	27	1.03846
CATCTATGGATAAGGTTGAA	27	1.03846
AGTCAGCGAATACTCCGTTA	27	1.03846
GGTTGTGCCTCTTCAGCAAG	27	1.03846
ATTTTTTTAGCCCTGTTAAC	27	1.03846
AACACGGAGATTCTCCTTGA	27	1.03846
TGGGTTTGAGGGTGTGAAAA	27	1.03846
GTTCTCCGAGGCAAAGAGAT	27	1.03846
CAAAGAGATTGGGTTAGTGA	27	1.03846
ATTTTCTGGATGAGCGAGGA	27	1.03846
TTGGAAGGGTGTTACATTAG	27	1.03846
AGAGTCAAAACTGACTCTTG	27	1.03846
GCGCAATCACAGGCGTTAAC	27	1.03846
CAAACACAATCACAAATAGT	27	1.03846
GGATTGAATAGGAATACAGG	27	1.03846
AACAAGTATCACAGATCTGG	27	1.03846
TAGGGCTTCCTTGACATTCT	27	1.03846
TCATGAACAAAGGAGAAAGA	27	1.03846
ATTCTGAAAACAGCCCATGA	27	1.03846
ATTGATCCACACATCTGAGT	27	1.03846
GTTTTGGAACGGTAAGTGAA	27	1.03846
TTCAAGAGCATGGCTGATAA	27	1.03846
TCCGTAGGTGATATAGATTT	27	1.03846
ACCAAAACACCTTGCTGGAA	27	1.03846
TTCTCAATATCCATTTCAGT	27	1.03846
GGCGCTTTGATACCAATTGA	27	1.03846
CATATCTTTGACTTATCATC	27	1.03846
TTTGGGACTGGTGTGAGAAA	27	1.03846
TAAGGAAATCAAGAACTGGA	27	1.03846
ATGGACATTAAAGCTTATGG	27	1.03846
GGAGTGATTGATGGTGAAGA	27	1.03846
ACAAATTGATGACAGGTTCA	27	1.03846
CTTATCGTTTAAATCCCATT	27	1.03846
GATCTCGTGGAGGGGGAACA	27	1.03846
AGTCTCACAATCTCCCGCGT	27	1.03846
TGGAGTCAAAAACCTGTTGG	27	1.03846
CTTAAATGAGGAGGTTTATG	27	1.03846
TGAGATTTACTTCGAGATTT	27	1.03846
GGTGGTCTGCACTCCTACCA	27	1.03846
ATTAACCAAATCTCTATGCC	27	1.03846
GTATCCCACAACCCCAAACA	27	1.03846
ACTCTACCGGGGAATTGATG	27	1.03846
ACCTTCTGAACATGTCGTTC	27	1.03846
ATTTCTGGATGATACTATCT	27	1.03846
GATTGTCTGTTATCTGGAGA	27	1.03846
AAAATGCCTAGTCTGCTGAA	27	1.03846
TTGAGATGATCTTTTTCAAC	27	1.03846
AGATTGGAGAAGTGGCTTAT	27	1.03846
AGGGGTATGATCCTTTGAAA	27	1.03846
TCGATGAAGCCGAATGGGTA	27	1.03846
GAAGATACAAGCTTCATATT	27	1.03846
TGAGAGAGCAGTGAATGAAG	27	1.03846
ATGAGAGAGCAGTGAATGAA	27	1.03846
GTCTTGGAAGGTCTTGATGT	27	1.03846
TTTCCAACCCCATATACTAA	27	1.03846
GCCAGCCAGGCTGTCCTTGA	27	1.03846
GCCTTCAAGGACAGCCTGGC	27	1.03846
CAATGCCTTCAAGGACAGCC	27	1.03846
TTTCCAGAACCCTTGAATTA	27	1.03846
AAAGCCTCCTTCACATTTTT	27	1.03846
GCACCGAGGAATTTGCAACT	27	1.03846
CCGAGGAATTTGCAACTTGG	27	1.03846
TCGACCAACATTTCTGCCAC	27	1.03846
TTTTGAGTGGTATAGGCTAG	27	1.03846
CAATTGGAAACGGTCAATCT	27	1.03846
TCCGTTAATGGAAAGAGAAC	27	1.03846
[truncated: 57,994 more rows]
[truncated: 1 more columns]

## Sheet: Guide Pool 5
gRNA target sequence	number of targets	Relative frequency
GTTGTACTAAGGAGTAGTTA	64	2.46154
TTTATTATTGGGGCTCGCCA	64	2.46154
GGAAGATGATAAGGATGCGT	64	2.46154
AGAGTCTTTTGAAGATGACG	64	2.46154
TTTGGCAAGTTTTGGAATTT	64	2.46154
TTGTTCGGGTGAACGACTTT	64	2.46154
TGCGAGGGTACGTAGGCACA	64	2.46154
GACTTAGAGTTTGGATTCAA	64	2.46154
GTCCAAAAAGAAGTCGCCCA	64	2.46154
GGCATGATACAAATGATTGC	64	2.46154
AGTGGCACTATTAGACAGAC	64	2.46154
AGGCCCATTATTCAATTAAG	64	2.46154
CAGCACATCACCTTTCCAGA	64	2.46154
CATGCATTGGCCATCTGGAA	64	2.46154
GACTAATTCTAAGGGTAATT	64	2.46154
ATATTCGAAGGCAACATCCA	64	2.46154
TTTGAAAAAGGCCTATGAAC	64	2.46154
GTTAACCGGTTAAACCTATA	64	2.46154
CTTTAATAGTGTGTGGAGGG	64	2.46154
TTAAAACCGACCGCTTCAGC	64	2.46154
ATCGGATCTGGACAGACATC	64	2.46154
AAAGCATAATGGTGAAGAAA	64	2.46154
CGCGTATGGGAAGGCGTGGA	64	2.46154
TGATTATAGAGATCTGAACA	64	2.46154
TGCACGATGGCAGATGCTTT	64	2.46154
TAACTTTCTTGTTAAATGCC	64	2.46154
AGGGGTTGTAATAGTTAATT	64	2.46154
TTTGAAAAGCCAGCCCTTAC	64	2.46154
ACAGAAGATACAACCACATT	64	2.46154
GAAATCCACGAAGGTTCCTT	64	2.46154
TCGGGAACTTTGAATTTGGT	64	2.46154
GTCATCGAAGGGTCATCGAG	64	2.46154
TTTAGCTTACTGCTCAAATA	64	2.46154
TTATTATTTCGGGGTGTTAC	64	2.46154
CTAATTCTGCTCCTAGGCCA	64	2.46154
AGTTGAAGGAAGCTCTTACC	64	2.46154
ACCGGATTTGGACAGACGTC	64	2.46154
TTAGGCTGCATCCATTGAAG	64	2.46154
AGTAATTTTGTTTGGGTACT	64	2.46154
ACCTCAGGTAGCCAGAATGA	64	2.46154
CTTGGCCACGTGATTTCAAG	64	2.46154
CACACTTACCCACCAATCAT	64	2.46154
ATCTCTGATACCAAATAAAC	64	2.46154
TCAGAGTTTGTCCAAGGGGC	64	2.46154
AGTCAAGATAGGAGCAGGCC	64	2.46154
GAGACAACTCTGATGGAGAC	64	2.46154
TTTCAAAGCCGATCCAATTT	64	2.46154
GTGCACCTCTGTTGTTTAAA	64	2.46154
ATTATCAACAGGATCCTGAG	64	2.46154
GAGACTCTGCTGAGGAACGG	64	2.46154
TTGGGAGAAATACGTAACAT	64	2.46154
GAGAACGTATGTGAGAGCTC	64	2.46154
AATCAACCACACGACCAAAA	64	2.46154
CCTCAATTTCTTAAATCTTG	64	2.46154
CTTATCTTTTAACCTAGGGC	64	2.46154
TGCCCTAGGTTAAAAGATAA	64	2.46154
ATTGTGCCTGGTTCCAGACG	64	2.46154
GGGTTAGGGGCTGATTTGTG	64	2.46154
CGATTACGAGGTATCACCGG	64	2.46154
CCCCGGTGATACCTCGTAAT	64	2.46154
TTTTGAGGTCAAATGGCATT	64	2.46154
GAGATGGTCTGATAGGCTAA	64	2.46154
CTTGAGGTAATTTGTAGCTG	64	2.46154
GGGGCAAGGGGCCCTCGGAA	64	2.46154
TAATAATCCAAGCATATGGT	64	2.46154
CTTTGTCCTTGAGTGCATAA	64	2.46154
ACAACGATGACGCATGGCTA	64	2.46154
CTCTCTCACCTGCCATGACA	64	2.46154
GGTCATTTTCAATGAAAAAG	64	2.46154
CTTGCACTGCTTCAAATGCT	64	2.46154
GGTCCTTTGCAAAGGGGTGG	64	2.46154
TTTTCTGGTCCTTTGCAAAG	64	2.46154
GTTTTGGCCTTAAGACAACT	64	2.46154
ATTTGTGCTTGCTCTGTTTA	64	2.46154
GGTCTTGGCTACTCAAAATT	64	2.46154
GGATGATTAGCTTGGTTTGC	64	2.46154
TTATGAAGACATGCCAGGGT	64	2.46154
GTAGTTCCACAGCAGCCCGT	64	2.46154
CGGGCTGCTGTGGAACTACT	64	2.46154
AGAAACTGTGACTGGGTAAG	64	2.46154
GGCACAAAAACCATGGAAGA	64	2.46154
TATGGTATGTTGTATTCTCA	64	2.46154
AGCTGGTTCTGGATCTGACG	64	2.46154
GGACGTGATGATTTTACTTT	64	2.46154
TTTCTTGAGCAGATTATTCA	64	2.46154
TGCTCAAGAAAATTAAGACA	64	2.46154
AAGGCTCAAGGGGTTGACAA	64	2.46154
TCACCACAAGTATGATATGG	64	2.46154
AGAGGACCCGTATCCAAAGC	64	2.46154
ACACTGAAGAAGGAATTCGA	64	2.46154
AATTGAAGAGAAGAGAATGA	64	2.46154
GAAGGACGCAGGCTTAAATG	64	2.46154
TCTTCATCAGTAACTTTGGC	64	2.46154
ACCCCAGACTTAAATAAGCG	64	2.46154
CCAATTTCTGGAGCACACCA	64	2.46154
ACGACCGACTCAAACAAGGA	64	2.46154
ATTAATGATTCTGACACACA	64	2.46154
TGATTGAGGAAAATATCCAG	64	2.46154
GCCCGAACCTCTTCTTTTTA	64	2.46154
TGTAGCTTGGCTGGTAAGCT	64	2.46154
GCTCAAAGTTGCAAGTAGAG	64	2.46154
AAGGGAACATGTGAACATAT	64	2.46154
TAAGTCAGAAGACGATCACG	64	2.46154
ATTTTGGAAAGAGCATGAAA	64	2.46154
GCTCAAAGGATGGGAAATTG	64	2.46154
TACCTCTTTGCAACAAAATT	64	2.46154
TCACCAACCTTAAACTCCAG	64	2.46154
TCTTTTTTGCTGAGACAAAA	64	2.46154
CATTTATGTTCATTCAACAC	64	2.46154
AGTCAATCAGCTAGAAGGGG	64	2.46154
TTTGGTTTGGTTTGTGTTTT	64	2.46154
GCTGTGATATATGCAAGTAC	64	2.46154
TTGAATTTGAGGCCTAATGA	64	2.46154
ATTGGGATTATAACGAGGAG	64	2.46154
GTCTTTTTGATAATCGGAAG	64	2.46154
TCAACTGGTGGCATTAAAAT	64	2.46154
AAAATCCTTCAATGAACTTG	64	2.46154
TTCTCGGAGAATGAGGAACA	64	2.46154
TTAATTCTCACGAACATGGA	64	2.46154
TCTCCAGCGGAGTTTATCCC	64	2.46154
GATCTGTAACTTTCAACATC	64	2.46154
CAAATAAAGTTCTACGTCTA	64	2.46154
CCTAGACGTAGAACTTTATT	64	2.46154
ACTTTTAGAACCTGTTTGGC	64	2.46154
TTAAAGATTTTGTGGGAGAT	64	2.46154
TGGAAAATGTTGGTTTTCAA	64	2.46154
CGGTTAACCGAGCTAAAACA	64	2.46154
GAACAGAAAAAGAAGTCCGT	64	2.46154
GGGGTTCAAACCTTATCAAC	64	2.46154
TTCAGTATCCACCATGCTAA	64	2.46154
ACATGCTTTTGACATAAGTG	64	2.46154
CTATGTTATGGCTTGATTAT	64	2.46154
CTATAATCAAGCCATAACAT	64	2.46154
GCTTGATTATAGGTCATAAT	64	2.46154
GCCACCCAAACTGCCAGATG	64	2.46154
TTACTTGGTCATAACAAACA	64	2.46154
GTGTGGTTTGGCATGGTGAA	64	2.46154
ACGTGATGGCGCCTGCCTCA	64	2.46154
GTTTCCAAAGGCTCTTTGTG	64	2.46154
TAGGTGTCTCCAAGAAAAGT	64	2.46154
AGTAAATGATTTCGTATGGA	64	2.46154
GTATATTCTGCACATTATCT	64	2.46154
GAGTGATTTTCCATGACAGG	64	2.46154
AAGCCGAGGGTATTCAAAGA	64	2.46154
AATCAAGAGGCTGATGGACG	64	2.46154
CCTCAGTTCATTCCCGCTTT	64	2.46154
TCGTTAGGAGGAATTGATGA	64	2.46154
GTTTTCATGTGTCTCAACTT	64	2.46154
CAATCATAGTTCCACTGAAC	64	2.46154
AATCATAGTTCCACTGAACA	64	2.46154
TTTTGGGATTGAATTGTGGC	64	2.46154
GTTGAGTCCAGACACCCTGC	64	2.46154
AGGGTGTCTGGACTCAACAA	64	2.46154
ACGCGGTCTAGCAGAAGAAG	64	2.46154
TGGTGATGATTTTACTAAAC	64	2.46154
AACTGCAAAACCTTACTCAA	64	2.46154
GATCGCCATACAGTTTCTTT	64	2.46154
ATTTTTATCATGCATCCCGC	64	2.46154
CTCAACGAAATACAAGGCTA	64	2.46154
AGAAGTGTGACGGTCGGGGT	64	2.46154
TAAGTGCATAGCAATTGTCG	64	2.46154
AGTTAGAGAGCAGGGAAGTT	64	2.46154
CTGATAAGTGGCACATCGTT	64	2.46154
AAACTGGATGAAGAGTCCGC	64	2.46154
GGGATAGAGGTTTGATGGAG	64	2.46154
GTTTGGTTGCCAAATGATAT	64	2.46154
ATTGACAATAGACGCTGCCG	64	2.46154
GGCTTTCAATCTTTTGAGTC	64	2.46154
ATCTAATCTCGAGTTGATGA	64	2.46154
CCAAACGTGTTGAATCGGGA	64	2.46154
CCATCCCGATTCAACACGTT	64	2.46154
AGAATCCATCTTAGGAGTCT	64	2.46154
TTACCAAAAGAGGATGGAAA	64	2.46154
TGGTGATTTTTGGCATGGCA	64	2.46154
ACTAAGAAAAGTTGAGGCAT	64	2.46154
TCTAACACACCAAGGATGAA	64	2.46154
TTCATTTTGGTGGAGTATTA	64	2.46154
AGGCGAATAAAGGTGTGAAA	64	2.46154
GTTCTTTTGGGAAAGAAATG	64	2.46154
ATGGCCTCTTGGTAGGTCAC	64	2.46154
GCGCGGCGCGTACTGTACTG	64	2.46154
AGTTAGCGGTTAGTGAATTA	64	2.46154
TAGTTAGCGGTTAGTGAATT	64	2.46154
GAGGGAGGACGACTCCAACG	64	2.46154
AGGTTGATCGCCAAACGGTA	64	2.46154
TTAATGAAAGAAGTTCACGA	64	2.46154
TTCGAGTGGTTGAGGAAGCT	64	2.46154
GGCCTGGATTTCGAAAGTTT	64	2.46154
GGCCTTTCCTCGGGCTTTTT	64	2.46154
AGCCCAAAAAGCCCGAGGAA	64	2.46154
TGTTTTCCTTGCCAAGAATC	64	2.46154
GTCAAGACTTCAAGAAAGTC	64	2.46154
GAATGCAATATTATTCCGAA	64	2.46154
AAACCACGGCTTGTCATCTG	64	2.46154
ATCAAGGTTAGCAGCAATGG	64	2.46154
TGGACGGGAGGAGTCTCTTT	64	2.46154
CTTTGGGCTAAAATCTTGAT	64	2.46154
GGGCTGGTCCGACACCAACG	64	2.46154
AAGTGTATTGTCTGAATACT	64	2.46154
TATGAATCATATCGTGAAAG	64	2.46154
TGCTAACTGATGGGCCTCCA	64	2.46154
TGGAGGCCCATCAGTTAGCA	64	2.46154
AAATGCTGACTGATCTGCAG	64	2.46154
ACCCCTTTTTCCTTGGTTTA	64	2.46154
TGTGAGTGTATGATTCGTTA	64	2.46154
ACAATATCGGTATCCAAACC	64	2.46154
GCCCAACAGATTGTTAAGAC	64	2.46154
GCGAAATCTCGATCAGAAGA	64	2.46154
GAAAGTTTGTTTCCCTCGCT	64	2.46154
AATGGACCATGCCCCAAGCG	64	2.46154
TGGTTCCTAAGTCCTCTCTT	64	2.46154
TAAAAGGTGAAGTCATGTTC	64	2.46154
GTAAGCAAAAGAATTGTTCG	64	2.46154
GAGTGCAAAACTAAAGCCAT	64	2.46154
GTTGGTAGTCGTCGACCGGC	64	2.46154
TACCTTGTTGATTTCAAGAA	64	2.46154
CACAAAATTCAAGAACCACA	64	2.46154
TTGAGGTGTTTTGAGGGCAA	64	2.46154
GTTGTCCTGAAGTGTGGGAA	64	2.46154
CTACTCCATCAATCTTGGCT	64	2.46154
GTATCCAATGGGGTTGGGGA	64	2.46154
AAGGGTAAGTACAACCCTGA	64	2.46154
CGAGGTAGTCATAATCCACT	64	2.46154
AGACACTATTCAGCCTTACA	64	2.46154
TTACAGCAAGTTCTTGACCA	64	2.46154
ATGTGTGTAGGTCATTAGCT	64	2.46154
GTACTGATAAGTGTTCTTTC	64	2.46154
TGTTTGGGTGGATCTTTGTG	64	2.46154
AGTTCCCCTGCTTCAATTCT	64	2.46154
GTTTGGGTTTTGAAGATTTG	64	2.46154
AAAGTTTGGGGAGGAGATTT	64	2.46154
AATCCATTCTGGGTATACTG	64	2.46154
TGAGACTATCTTGGAAATAA	64	2.46154
TTAACCTTGCTGAAGAAATT	64	2.46154
CCAAGGACGGGATGCTGTGA	64	2.46154
AGGGTTTGTGTTGTTAGGGG	64	2.46154
TCAGAGGGACACCTAGGGTT	64	2.46154
CTCCTTCATGGATGGATTCT	64	2.46154
GAAATCAGTTGCAAAAAGTT	64	2.46154
ACTCGTGGGACCCTTGAGTA	64	2.46154
GGGGGTGCAGGCAAGAAAAA	64	2.46154
AAGTAACTAATGGACCATAC	64	2.46154
GGCGGAGTTTTGTAACCTCT	64	2.46154
CGTGAGGACACGACTTGCTG	64	2.46154
CTACATAGAAAGCTGTCAGA	64	2.46154
ATAAAAATGGCTTCTACTTC	64	2.46154
ATTGGAGGTAGGAAGGAAAA	64	2.46154
TGTTGCTGCTATGGAAGCTA	64	2.46154
CCACCCTTACCTCGATTCCG	64	2.46154
AGGTCCATATAGTGATAGAA	64	2.46154
TTTTCAGTTTCAGTGTTCTT	64	2.46154
CTTAGCTTCTGTTTGACCGG	64	2.46154
GTGTTTGAACTCTGGTTTGA	64	2.46154
TTGTGGGTTTATTATGGGAT	64	2.46154
GTTTTCTGGGAAAAACCAAA	64	2.46154
GTAAGTTGTGCCTGGTGTGA	64	2.46154
GAAGATGAACCTCAGAAGAA	64	2.46154
GATTGAGGTTAAAGGCTTTA	64	2.46154
TATGAGAAGTAGGCTAGGGT	64	2.46154
GTCTGGAGTCTTGAACTTCT	64	2.46154
TGTTATTTCCTATCCTTAAG	64	2.46154
CAGCTTTTGATGGAGGGTAG	64	2.46154
AAGGGACATTGAAGAACTGA	64	2.46154
TGAAGAACTGAAGGCCAACA	64	2.46154
GGCTGATTCAAATTGAATCT	64	2.46154
ATGAGCTTGATATGAAGGTG	64	2.46154
ATACACAAACAGATATTGCA	64	2.46154
CTTCTCTTGTGACTCTGGTG	64	2.46154
ACATTTGGCAGCCCATGCTA	64	2.46154
GGATGAACATCCAATCATTT	64	2.46154
TAGTCTCTCATACCAAGCTC	64	2.46154
CATCGGATATCTCCATTGCA	64	2.46154
GAAGAGAAAAAACACTCTAC	64	2.46154
CCCCTCGGAGCAAAAATCAA	64	2.46154
GCCGATTTTATTCCTCCCAG	64	2.46154
AAGGTGAAGGATAACTATTG	64	2.46154
TGTGGATAGATTAACGAAGT	64	2.46154
TCCTTTCCAGGCATGAAGCA	64	2.46154
TTCAGTTTGACCGCCCTCAG	64	2.46154
CTGCTAAGACATTCCCTTCA	64	2.46154
ATTCACATAAACCAAGCAAA	64	2.46154
GAGCCTTTAGTGTTAGCTTT	64	2.46154
GACCAGCAATTGGACCATCG	64	2.46154
AGTTTATAACGACTACTGCG	64	2.46154
GGTCATTGGAATAAGGATTG	64	2.46154
ACATACATAGCATGCATAAC	64	2.46154
GTCAAATTTGAAGGGAAGGA	64	2.46154
AGAAGACTGCTTTTAGAACG	64	2.46154
TGTAGCCATTGCCATAAAGT	64	2.46154
CCTAATAGACTTACAATGTT	64	2.46154
CCAAACATTGTAAGTCTATT	64	2.46154
GCTCCTGTTCTGATTTCTGG	64	2.46154
AGTAGCAAAGTACCCTGAGT	64	2.46154
ACCACCAAATTTTACTCCTG	64	2.46154
TGCCATGTACGAGTGATAAA	64	2.46154
AATCCACTGGGGATATGCTG	64	2.46154
CAATTTTCTGTTCCATGACC	64	2.46154
TCGTTAAGAAGCAAGTTTTA	64	2.46154
ATCTTGAACTCTGTTTTTGA	64	2.46154
CGTCAGAATTGCACCAATCA	64	2.46154
GAAGCATATGCCAAATAAAT	64	2.46154
AAATCTTTTTTTGCCTCGCT	64	2.46154
ATGGAGAATAGCGGTATTTC	64	2.46154
AAGATAACAACATGGATCAG	64	2.46154
TGCTGTTGTGTGAAAATCGG	64	2.46154
GTGCTTCTTCTTGCCTCAGT	64	2.46154
TGTTCGATATTATGCTGACA	64	2.46154
CATCTGCGTTCACAAAAAGC	64	2.46154
CGTGACCGTTGGAGTCACAA	64	2.46154
CGAAGAAGGATCCATGACTT	64	2.46154
TGAGGGCAGACCATCTTTTG	64	2.46154
CACCCCTAATGGTGGCATCT	64	2.46154
CTCAAGCAGCTCGATATTTA	64	2.46154
TATCTTATGATTGGTCTCTT	64	2.46154
TTATGATTGGTCTCTTCGGT	64	2.46154
TGTCCAAAAAACCAACCATT	64	2.46154
GCCTTTATTGGCCTAGTTTA	64	2.46154
TAATTGGATTTAGTCTCCTC	64	2.46154
AAAAGAGGCAGAATTCGAAA	64	2.46154
GAAGGGCCTTCCTAGAATGA	64	2.46154
TTTTGTATGAGAAGTTCGGA	64	2.46154
CAGAAATTTCTTGAGGGGAT	64	2.46154
GTGGGGGAGGAATGTAGGAG	64	2.46154
GGTACGTCGACCTAGCGGGT	64	2.46154
GGTACTGGCTCCGTTCACCC	64	2.46154
CGGGTACTCTGCGGGGATAG	64	2.46154
TATGATCAAACAACGACTGC	64	2.46154
GTTGACAGATATCCTTCTGA	64	2.46154
ACAGAGAGCAACGAAAACAC	64	2.46154
GTTGTCAAGAAAGCCTTTTT	64	2.46154
AACTCAAGCCGCCAAAGCAC	64	2.46154
AGGCAGACTGCTCAGTGAGA	64	2.46154
TTTTTAGCAGAACTACGTGG	64	2.46154
CGGTACATTCATTGGGGGAT	64	2.46154
CTATTCGGTACATTCATTGG	64	2.46154
TCAAGATTCTTGAGAAGAAT	64	2.46154
CATAGCAAAGGGCCAGGGAG	64	2.46154
CCAAGAATCGCAAGAACGAG	64	2.46154
GTAAATTCTGATGGAATAGT	64	2.46154
CAGGGTGAAATGAATTTTGC	64	2.46154
TGGTTCATGATCTGTTTGTG	64	2.46154
GATGGAACAGGGGAGTCGGC	64	2.46154
AGATCACCACAGGTTCCCTC	64	2.46154
AAGTGGGCACTGGGTTTCTC	64	2.46154
AAAAAGTAGGTGATTTAGTG	64	2.46154
GTTTGAGTGATGATTGGAAC	64	2.46154
AGCATGCAGCATTTATGGAG	64	2.46154
GGCGCAGCTCAAGGGGCACA	64	2.46154
GGACATCGAAAGGTTGTCTT	64	2.46154
GGCACAGATATGGGCCACAA	64	2.46154
TCTGGTCCCTCTTCTGGGTC	64	2.46154
AGGTCATGTGTATTAGAGCA	64	2.46154
TCTCCGGCATCTTCTGTGCT	64	2.46154
TCATGAAGCTGAATAGCGAG	64	2.46154
AGCCGGTGAAAGCATGACGT	64	2.46154
TCCAAGAATTGGAAGAATTG	64	2.46154
GCTGAAGCAGGGAAATCTGT	64	2.46154
GCCTATTCGGATTGCCGATC	64	2.46154
TCCCGATCGGCAATCCGAAT	64	2.46154
TGAAAAAGGGTCAAGGAAAG	64	2.46154
TAAACACAGGGGGTACAGTT	64	2.46154
GGAAAGGAGACGGGAATGAT	64	2.46154
CAAGAACTGCATGACGGACG	64	2.46154
TGCAAGAACTGCATGACGGA	64	2.46154
TCAGTCTCAACACCGTCACG	64	2.46154
GGGTATTCCCCAGCAGTTAC	64	2.46154
CTCAAGAAGACAGTGGTTGT	64	2.46154
GGATGCATAGGGGTCTTTGT	64	2.46154
ATCTTCTATGTTTGCCATGA	64	2.46154
GGATGACACTTTATTAGTGG	64	2.46154
TGTTTGAGGCTTTGTATGGT	64	2.46154
CAAAATTTCCCCTTTCTTTA	64	2.46154
GGGGAAAACATCAAACCTGC	64	2.46154
CTCAGAGCACTTGCTAGTCT	64	2.46154
AATCAAGAACCACCATAATT	64	2.46154
GGAGATACATTGGTGAATAC	64	2.46154
AGAAGGTCGTCTGGTCAGAG	64	2.46154
TGCTGAGGTTGCTGACACTG	64	2.46154
AAAATAAGCATGGTTTAGCA	64	2.46154
TTGAAATGATTGTGGGGATG	64	2.46154
GATGATGACAATAACGGCAG	64	2.46154
ACCATCCTCCTCTATTTCTA	64	2.46154
TTATTTTGGCAACTTCACTG	64	2.46154
TTGATGGGAATTTGAAGTTT	64	2.46154
GGCAAAATTTTGGTGAACTT	64	2.46154
GAATGGATTATTCTTTAGAG	64	2.46154
AGTTACTTGGGCTGTGTTCA	64	2.46154
GTGAGCAATCGATTGCAACA	64	2.46154
AAGGTTTTTGAGGACAGTTG	64	2.46154
GAAATCTTGTGATCTTTGGA	64	2.46154
TGGGAACCGGGTTCCAGCTT	64	2.46154
GGAACCGGGTTCCAGCTTAG	64	2.46154
TTCTTTGCTTGAAAGTTCCT	64	2.46154
AACCAAATGAGTCTGTGGGC	64	2.46154
GTGCAATCTCTGGCAATAAT	64	2.46154
TTTCCTTCTACAAACACCGC	64	2.46154
TCAGAAGACCATTCCAATCT	64	2.46154
CTTGTGGTTCGGACCTTGCT	64	2.46154
TCTTGTGGTTCGGACCTTGC	64	2.46154
ATGACCTGCCATTGGTTGCA	64	2.46154
CACGAGAATATACTCAATCA	64	2.46154
CAAACTCTGGCCAAGCATTT	64	2.46154
TGGAATCGGAGGTTCACTCG	64	2.46154
GGAACTCTGCTGAGGATAAA	64	2.46154
CTCTACTACTGTTTGATCAA	64	2.46154
AAAAGCATCTCACTTTCGAA	64	2.46154
ATCCTCTGAAGTTTGCATCT	64	2.46154
CTATCTGGGTAATTGTAGAC	64	2.46154
TTCTTACCACGGACGTCTTC	64	2.46154
TGAAGACGTCCGTGGTAAGA	64	2.46154
GATGCGATTGCTGAAGCTTT	64	2.46154
CCTGGTGTTAAGGATTGGTG	64	2.46154
ACCAAACTTCAGTTGGGGGG	64	2.46154
TCGTTCGGTTTGAAGAACGC	64	2.46154
CAAAGAAGGATGGGAAGGTC	64	2.46154
AATTGCCGGAGTGATAATAT	64	2.46154
ATATTATCACTCCGGCAATT	64	2.46154
TAGCAAGAAGAATCTGAAAA	64	2.46154
TCAGATGCTGACATACGATA	64	2.46154
GCTTCGAAGATGGGTCTAGG	64	2.46154
AATTTAGTTAGTGGGTTAGT	64	2.46154
AGCCAAAATCCCAACATTTT	64	2.46154
ATTTTGGATGAACTTTGAGC	64	2.46154
AGCATTTGTGAGGCTAGGTA	64	2.46154
GCATGATATTGAAAATTGTC	64	2.46154
GTTGCTGTGGATACCTTGGC	64	2.46154
TAACCTGACATAGTTTGAGA	64	2.46154
CCCTGCTGACTTTATCATTA	64	2.46154
TCCATAATGATAAAGTCAGC	64	2.46154
AGAGTTTGATCTGGAGATAA	64	2.46154
ACCGAAGCGAGTGGCAAATC	64	2.46154
TTTCTGGGCAAATCAATATC	64	2.46154
TCATCTCATTACTTGATTTC	64	2.46154
AGTGTAGGGTACACAGGACC	64	2.46154
CAGTGTTGAATGATCATATA	64	2.46154
AGGACTTTCTATCAAGAATA	64	2.46154
GAGTATCAACCAACTCCAGT	64	2.46154
GATGGTTTGGACACATCACA	64	2.46154
ATTGGTGATGGGGAGGTCTC	64	2.46154
ATGCAGACTTACAGATGATC	64	2.46154
CCGAGGCTCCGTTTTTCCGT	64	2.46154
AAAAGGGTGGTTTACAAAGG	64	2.46154
ACGTGCATTGGCATTGTAAT	64	2.46154
GTTATGGGTGGTTTGGCTCA	64	2.46154
GCATGCATTGGTCATAGGAA	64	2.46154
ATTAGAGACATGGTGGTATA	64	2.46154
GGTTTGTGAGAGAGGGGGCG	64	2.46154
TATCATGGTCTGTCAAGAAG	64	2.46154
CTTGAAAAGTGTGGTTTTTG	64	2.46154
TTGAATGTAGAGAGTTTTAC	64	2.46154
GTAGAGAGTTTTACTGGTGT	64	2.46154
GTGGAAAACGGATATCCAAC	64	2.46154
TGCAAATATGCATGTCTGCT	64	2.46154
TTGACGTTGCCAGATGACAA	64	2.46154
AACATTATTGTCTACGAGGC	64	2.46154
CTGAGTCTGTGAAACAAGTC	64	2.46154
CAAATAATCCCCCTCTTTTA	64	2.46154
AAAGTGTCTGAAACTCAGTG	64	2.46154
TGAATTAGCTCAGACAGCGT	64	2.46154
CTGCAAGTGCTAAAGGATTT	64	2.46154
GCGAGATATGGCTCAATTGG	64	2.46154
AAGACAACTTGGTTATCCCA	64	2.46154
AAGTGGCTAAATATCCCGAG	64	2.46154
GTCTTTAAATCAACAAACAC	64	2.46154
GCTTCACATTTGCCTATAAA	64	2.46154
ATGAATAGGAATCTTGTTAG	64	2.46154
TAACAATGCTCACTATAAGA	64	2.46154
ATGATGATGAGCTGTTGGAA	64	2.46154
CAGTAGTTGATCAAGCTATC	64	2.46154
CCTTCTGAAGGTTCAGACAG	64	2.46154
ATTGCTTGGAAGTCTGATTG	64	2.46154
AGGATAAAACTTTGCCAGCT	64	2.46154
AACAAGCGATCGGATACCAG	64	2.46154
GTGCAGGTTGATATCATTTT	64	2.46154
GAATTCAGAGTTGATGAGAG	64	2.46154
CACTCATACCTGCCACAACA	64	2.46154
AGAAGAAAAAGAGAGGGCGT	64	2.46154
TTAGTTTTTGAAGAAGAGAG	64	2.46154
GGTGTGGGTGCCAAATGATA	64	2.46154
CTGCATCTGATCTGATGCAC	64	2.46154
CAAATCCCCTAAGGCATTAT	64	2.46154
TCTGGTTAGAGAATTTTCTC	64	2.46154
TGTAGGGGTTGTGTGAGAAC	64	2.46154
GACCTCCATCTCTAAGTTCC	64	2.46154
CACAATGGAGTGTAATTCAC	64	2.46154
GTATTGGCCCACAATGCTTA	64	2.46154
CTCATTGTTAATGTAGTCTG	64	2.46154
ACCCGTTTCACAACTTAATC	64	2.46154
CCAAACCTCAGAAATCCACC	64	2.46154
GATGTTTGTTCAGAAGTTTG	64	2.46154
GGATCTTGTCAGCATATATT	64	2.46154
ATGCTACCCTTTGCATTGCA	64	2.46154
CGCGGTTTATCAACGACGTA	64	2.46154
CTGAAATGACAAATTTGCTC	64	2.46154
ATCCAAATCCACACATCAAA	64	2.46154
TTCTTCATTGATAAGGCAAG	64	2.46154
TTGATCATTTTTGGTCATAG	64	2.46154
GTTGGGAATTTGGTGTTTTT	64	2.46154
CATGGCCTGTTCCCCATTAA	64	2.46154
ATCTTAAAATGAGGTAAGAG	64	2.46154
CCCACGTTCGAGAAATATAC	64	2.46154
TTTCAAGGGAAGTATATGAA	64	2.46154
TCCGCTGGGGATTGAACATT	64	2.46154
GTTTCTTTTCTATCACTGCA	64	2.46154
GGGCAATCTAGGCAAAGTTA	64	2.46154
CTAGGCTTCTTAGTACCACT	64	2.46154
ATGTGCGTTCTTGGAGGTTT	64	2.46154
TCCTATTGTTTTTCCTTATG	64	2.46154
TTTGGTTTTATTCCTCCAAG	64	2.46154
TCTAAATCAGGCCACACCTA	64	2.46154
GATTATTTACAAAACCCCAT	64	2.46154
ATAGAGTACTACGGACGGGA	64	2.46154
CATAGAGTACTACGGACGGG	64	2.46154
AAAGGCGGATACGTAGGCAG	64	2.46154
ATTCATCCCTAACTTTTGCC	64	2.46154
TCCATCTGGTCTGGATCTCA	64	2.46154
TCACCAACTCGGAAACTGCG	64	2.46154
TAGTCTTTCAGATTCTCTAC	64	2.46154
AAGACCTTCGCTGGGCGAAG	64	2.46154
CTTCACTGTTGCTGTGGAGT	64	2.46154
ACACATGATGATGAATTACT	64	2.46154
CAAAGATTGTCAAAAGTTGA	64	2.46154
GCTAAAGACAAGTTGGTAAT	64	2.46154
TTCTGGGTGAATCTGGTTCT	64	2.46154
TGAGAAGTAAAGAGATGAGA	64	2.46154
GCATGTGGAAGGCTAGTTTG	64	2.46154
TCAAACCTTGTTGAAGAAGA	64	2.46154
ATAGCTTCTTCAAATTGCCT	64	2.46154
ATGATCTGGTATGAGGAATG	64	2.46154
TATGATCTGGTATGAGGAAT	64	2.46154
CATGGCTATCAAGATCAAGG	64	2.46154
TTCCTTAACTCATCCAAATT	64	2.46154
CGCTAAGTCAAGACCTTTTA	64	2.46154
CTTAAAAGGTCTTGACTTAG	64	2.46154
AAGACCTTTTAAGGAGACTT	64	2.46154
GTTGGTTTTCAAGGGTGAGT	64	2.46154
CATGCAGAAGAAGGATCAGA	64	2.46154
GGATGAGGAAGGTTGCCAGA	64	2.46154
TAATGCACCGGGAGTATTCA	64	2.46154
TACCCATTGGGTTTAATCCT	64	2.46154
GCTGAAGTGGGGAAGTGAAG	64	2.46154
ACTCTGCTGAGGAGACTGAA	64	2.46154
GAAGAAGGGAGAAATGATGA	64	2.46154
TTCCAAATAAGCTTCTCTCT	64	2.46154
AATGCTTATGGCCGCAGAAT	64	2.46154
CTTCTCTTTGTTCTTGGTGG	64	2.46154
ACCCTTTCTGAAAACACTGC	64	2.46154
TTATTCCCCGCAGAACGCCT	64	2.46154
TCCTAATGCCCCAGACTCGA	64	2.46154
ACGGGCAAGTGTATCAGAAA	64	2.46154
GAAACCCCTGTTTTAGAAGA	64	2.46154
AAGGCCGTTCCTTGGAGTTA	64	2.46154
AGTTTGAAGTTTGGTGTATA	64	2.46154
AAGTCGGAGGAAGATCATGC	64	2.46154
AAGTGAATTGGTTTAGTAAC	64	2.46154
TACTAGAGATCATATCGACA	64	2.46154
TTGAAGAAGGCCATAGGAGT	64	2.46154
TCACAGAAGATCAGACAAGA	64	2.46154
GTCAATGGAACTGCCTGAAC	64	2.46154
GGGTAAGCAAGTTCAAGAAG	64	2.46154
ATCCGAGTAAGTGTACGTTC	64	2.46154
TCCGAGTAAGTGTACGTTCG	64	2.46154
TCTCCACATCAAACCACAAA	64	2.46154
TTTGGCAAGGCTTGGAACTC	64	2.46154
TGGTCGCCCATGGATTCACG	64	2.46154
TGTTACCAAGTGATGTCGTT	64	2.46154
CCCATTACCTAATGCATTCG	64	2.46154
CCTCGAATGCATTAGGTAAT	64	2.46154
GCCTCGAATGCATTAGGTAA	64	2.46154
TGGTACGCGTATGGGGGGTG	64	2.46154
AGGCTCAATTCAACTCGGTA	64	2.46154
AAACTCGGTGGGGATTACCA	64	2.46154
GAGAGTCTCCATGATCTGTT	64	2.46154
TGAGAGTCTCCATGATCTGT	64	2.46154
TCCCTGTCCGATAGAGTCAT	64	2.46154
AACTTGTTGTGCCCTAGCAT	64	2.46154
AGCGCTCCTTGCCGAAGCAA	64	2.46154
AACTTTGTCAAAGTTGCAAA	64	2.46154
TTTGTCAAAGTTGCAAAGGG	64	2.46154
TCACGATATGATCCATAAAG	64	2.46154
TGAGAAGCAAGTATACCCTG	64	2.46154
CCCCGCAAAGTTCAAGACTC	64	2.46154
GCTCACTGTTCTCCTCTTCA	64	2.46154
AAGAAGATGGAAAATGGATT	64	2.46154
CCTCACTCCTCAGCAAAGCA	64	2.46154
AATGCGCCTGGGGGTATTTA	64	2.46154
GTTTCAGAAAATTTCCCTGA	64	2.46154
TGCCTTTATTGAGCTCCCAA	64	2.46154
ATATACAATTCACACTCTTC	64	2.46154
GAATAATGCCAAAACAATGC	64	2.46154
AGGCTTGGACTTGCTACAGA	64	2.46154
AAAACGCGCGCGAACGGCCA	64	2.46154
CTGCTAGGGAGCTAAGGGAA	64	2.46154
AAGCCTAATGTTATCATGCA	64	2.46154
ATCATCAAGGAAAATCCATT	64	2.46154
AGGTGCATCTACTAGTATGT	64	2.46154
TACTAGTAGATGCACCTGCG	64	2.46154
GTACCACCATGGCAACTTCT	64	2.46154
TTTCCACCTAGAACCGGGCT	64	2.46154
CACATTATGATGTCAATGCT	64	2.46154
CTAGCATTGACATCATAATG	64	2.46154
CCGTTGATCGCACAAACGCG	64	2.46154
AATTCAGTCCGTACTTCAAC	64	2.46154
TTTGGAAGAAAGGATCTTGA	64	2.46154
AGGCATTACTCTGTAACAGA	64	2.46154
GGGTCTCTATTTATAGAGAT	64	2.46154
TCAGACCGAGGCGGGTGATT	64	2.46154
GTACTCCGGTTCTTTGTTCT	64	2.46154
GAAAGTATCTGAAACTCAAC	64	2.46154
CCATCTTATAGTTGTTTGTT	64	2.46154
CTGAGAGGAAAAGATGTAAG	64	2.46154
GTAGAAAGGAAAAGCACCTC	64	2.46154
AGTGATCGTTGGAATCGCAT	64	2.46154
TCTTGCATTAGCGTCGTAAT	64	2.46154
AGTGAGAGTTTGTTGCCAAA	64	2.46154
GATATGAAATACTTGGAACG	64	2.46154
TGACAAGTCAAACTGAGGCC	64	2.46154
TGAGGTTCAGGCAAAAATTA	64	2.46154
TCCCAGCAGTTAAAAATGGA	64	2.46154
ACCATCCATTTTTAACTGCT	64	2.46154
TACCATCCATTTTTAACTGC	64	2.46154
GGCAAAGATTGTACTCTACT	64	2.46154
GGTTAAGGAAGTTCCAGTTG	64	2.46154
ACTATGGTCAACAGCATTGG	64	2.46154
GCATCTGTATCACTCCCGCT	64	2.46154
ATTCAGCGTGAAGGAGACAA	64	2.46154
AGATGATTTGGGATGGTTTA	64	2.46154
AGGGGTGTTCTAAATGTGTG	64	2.46154
AATCTATCTTTCGAGAAACT	64	2.46154
CTCGGGGTATTTCCCAAGGA	64	2.46154
GCAGGGTGTCAGCGTGAGAT	64	2.46154
GTGTTGAGACCTGGCTGCTA	64	2.46154
TGGTCTCAAACAAGCCCCTA	64	2.46154
CTTGGTAACATTAGCATAGG	64	2.46154
GGGGATAGGTGGTATCCTTT	64	2.46154
GGCTTTCCACGTGTGTGAAT	64	2.46154
CGTAAATTGAGTATAGTTGA	64	2.46154
GAAGCATCCGCGACTCTCTG	64	2.46154
TCAGTACTACTCAGATGTGT	64	2.46154
ACAACCTTTTCACTTGAATA	64	2.46154
CTAACATTGCCAAACTGAAG	64	2.46154
TCTTCTGGAAGACTCCGCTG	64	2.46154
GAGTTTGGTGTTTCAAGGCT	64	2.46154
TGGATGAAGAGATTGAGATT	64	2.46154
CATCCTTACAAAAAGTTCCA	64	2.46154
TGTTAATTTCAGAAGACAGT	64	2.46154
GCCCATGAAATTTGACTTCC	64	2.46154
CATATCTGTAGGATGATAAC	64	2.46154
TTTTCGCTTGAATATGGAAC	64	2.46154
GACACCACTGCTATCCGTCA	64	2.46154
CTCCCTCTTCAAGATGTAAG	64	2.46154
TTCTGGCTCATCTTCAGTGT	64	2.46154
ATGTTTGTCCCTTCAGGTCT	64	2.46154
CCTGAAGGGACAAACATTAT	64	2.46154
AGATTTTATGGTGGGAATCT	64	2.46154
CAGATTCCCACCATAAAATC	64	2.46154
GGGGAGAATATTAATCTCAG	64	2.46154
AAAGTTGAGTGGAGTTCTAT	64	2.46154
CTGTGTCTATGGCACCATAC	64	2.46154
GAGGTCCTCGCCAGGTTGGG	64	2.46154
AGTACGATGTGCCGAGACGC	64	2.46154
CATTATTTTCCCTTTCCTTT	64	2.46154
GGAAGAATAATACTCTCAGG	64	2.46154
AGGTTGAGTAAATCTAAGTG	64	2.46154
AGCTGTGTGCAAAACTCTTG	64	2.46154
TTTTTGGGGTAAAGTGGCAA	64	2.46154
ACTTGGAAAGGTTATGCTGC	64	2.46154
TTCAGAGGAAACTTCTTAAG	64	2.46154
GGTTTAGCTACCCATCACCA	64	2.46154
AAGAACTTCATAACGAGAGG	64	2.46154
GAAAGGTGATGTGCTACATG	64	2.46154
TGTTGTCGTGTATGTTGTGT	64	2.46154
ATGCTAGAGATCATATCGAC	64	2.46154
TTTGGGTTGGATTACCATCC	64	2.46154
TTCCGGGGGCTTCTCTTGAA	64	2.46154
TCATCTCCTATTTATAGGAT	64	2.46154
AATGGCCTGCCCCAATGTTT	64	2.46154
TCTACCGGGTCTCGAATTCA	64	2.46154
CTTCTTCTAAAGCGGCTTGC	64	2.46154
GTGATTCTTCAACAGATGTT	64	2.46154
ACCATGCAGTGTGTTAGTAT	64	2.46154
AACCCTTAGTGCATACCTTA	64	2.46154
TGATGATTTGATGGATCATT	64	2.46154
GTTTGTTCAAGTGCTCCATA	64	2.46154
AATGGATTTTCTAGGTTGAG	64	2.46154
TCTTCTGGTTCTCGGTTCAG	64	2.46154
TATCTATCTGTGAAACCAAG	64	2.46154
CACGGTTTATGGAATGAGAG	64	2.46154
AAAGTTAGTTGGGGCGAAAT	64	2.46154
TGAAGGTTTTGGACATATAA	64	2.46154
AAGATGGAAAGAACAAGAAT	64	2.46154
AAAAATGCAGGTAATATGTC	64	2.46154
TTTATTTAGGTGTTTTGGAG	64	2.46154
ACAACTTATCCGAATTCCGA	64	2.46154
TGGTACGAAGCTTGTGTCTA	64	2.46154
CTAGGACATGTGATATCTCG	64	2.46154
GCGACGATTCGACCCAAATA	64	2.46154
GGCTGATGGACCTGATAAAA	64	2.46154
GGAGTTGAAGAGCAGAGAAG	64	2.46154
GCGCTCCCAGCTTCACTTTG	64	2.46154
AACAAAAATCGATTTTCCGC	64	2.46154
GTGGTGGTCAAATGGTATTT	64	2.46154
AGTAAGCCACGTGAGGGTGC	64	2.46154
TTCCATTCTGGAATCTCTAA	64	2.46154
CGGATAAAACTTTGCCAACT	64	2.46154
TTCTTGACATGTTGGACCAG	64	2.46154
ACACTTTCATTAGAACTGGA	64	2.46154
GATCACATCATCAATAGATA	64	2.46154
TCACCAAATTTTCAATGGAA	64	2.46154
AAATTTGTGATGTGAAGCTA	64	2.46154
AAGGTCTATGTTCCAAAGTA	64	2.46154
AATCAGAGCAATTGTAGTTC	64	2.46154
GTGAGAAAGAAGCAAAAAGA	64	2.46154
GCCCTAGTCCACTTCTCTAG	64	2.46154
GAGAGTGCTAATGTGTATGA	64	2.46154
TGAGATGCTGAGCGAGAAAG	64	2.46154
CGTTGCCCAAAGTTGTAACG	64	2.46154
GCTGCTGTAGCTGAAAAATG	64	2.46154
GGTGTTGATCCATTACTTCC	64	2.46154
CAATCCTAATGTGCCGAATG	64	2.46154
GCCAGCCCTGATCCTGAAGA	64	2.46154
GATACACTTGCCGGGAACCT	64	2.46154
GAAAGAAGAAAATGTTATCC	64	2.46154
ACCGATCCAGTCCCGCCAGA	64	2.46154
TCCTTCTGGCGGGACTGGAT	64	2.46154
CCCTCATTTTCAGCTATAAA	64	2.46154
GATCCTGTGACGTTGCATCT	64	2.46154
AGTGTGGGTCCCCCTCGCCT	64	2.46154
GGAATCCACAGGTTTTCTAT	64	2.46154
AGTTCTGATACATCTAAGCA	64	2.46154
CAATCAATAGTCCTAGACTA	64	2.46154
TCTGATTTCTTCTCCTTTGA	64	2.46154
CCACTCTGGATATACTGAAG	64	2.46154
CCACTTCAGTATATCCAGAG	64	2.46154
TCATAAAGGAAGACTTGAAT	64	2.46154
ATATTTGGTAGCTTGGTGGA	64	2.46154
TTACTTGTGTTTCCTATCCC	64	2.46154
AAATGATTCAGAAATAAGGG	64	2.46154
GGAGGCATGGGAGAAATGGG	64	2.46154
TGAAAGGTTATGAAACTTGA	64	2.46154
ATGTTCTTTGTTGAAGCAAG	64	2.46154
AAAATGGAAACCAATGGAAC	64	2.46154
GGCCAAGAAGTGCCATATTC	64	2.46154
GCATCATTGTTTGCAATACG	64	2.46154
CACTAGGGCGCCAATTGGAT	64	2.46154
GTCATAACGTTCAAGAGCGA	64	2.46154
TGTTTTCGGTAACACATTGA	64	2.46154
GCTGCTGATTGTTAAGATTT	64	2.46154
CTCTTCGTGCAGATTCATCC	64	2.46154
CGAGGTACGATAACCATGCA	64	2.46154
CAACCCATGGTCAACAGCAT	64	2.46154
GTCGATCAAACACTGAACAC	64	2.46154
GACTCGCTGGGGATTTGCAT	64	2.46154
AAAGAAAAGGATAAGAGAAG	64	2.46154
CAGTGGTCGAAGAGAAACCC	64	2.46154
TGATGCAGTGTTACAATGGG	64	2.46154
AGGAATTTGTTTTGGTGGCC	64	2.46154
AACAAATTGGCGCCGCTGCC	64	2.46154
GCTGTTTTTTCATGATCCGC	64	2.46154
ATTTCCAGTACGGGCTCTGT	64	2.46154
ATTTAAGGTAGGCTTAGGAT	64	2.46154
TTCTTTTTGGATCCTATACC	64	2.46154
ATGGATGGTGGATAGTGATT	64	2.46154
AGCTATGTTACTTTTGGTGA	64	2.46154
TTGATCTGTTCGCGGCGCGC	64	2.46154
AGAGATGACGACTCCACTGG	64	2.46154
TTGAACTCTGTATCGCTGCC	64	2.46154
AGAGATAAACTCTAATGGGG	64	2.46154
TGAAACTCACTGAGGAGCCA	64	2.46154
GATAAGTTGAAAACTCGAAA	64	2.46154
CTCTGGGATTTGGTCATTGA	64	2.46154
GGATTTTTGCTTTATGCTCG	64	2.46154
TGACAAAAGGATAACGTGCC	64	2.46154
CAAGAAATTCTTTTCCGGAG	64	2.46154
GATTGAGGAAGTTCCAGTTG	64	2.46154
TGAATCGGTTTGATCGAAAA	64	2.46154
ATGTAATTTAAATCGAACGG	64	2.46154
TTTCCTGAGCAACTTGAAAA	64	2.46154
GATGTCAGAATGTGAACATA	64	2.46154
ATGCCCCACTCAGACTATCC	64	2.46154
TCTTATAGGGTTTTAGATGT	64	2.46154
TGACACCTCCGATCAGATTA	64	2.46154
GGCTGGAAGTTTCGAGACGG	64	2.46154
TGTCGTAATTATCTCTCCCA	64	2.46154
TCCGGACCTCAGAATCTTCT	64	2.46154
TTGGGAAATGGTGCATTTAG	64	2.46154
TCGAAAATTTCTTGAGGGGT	64	2.46154
ATTAGAGAGTGTTGAAATTG	64	2.46154
CAAGCGAAACACCAACCACT	64	2.46154
CCAAGCGAAACACCAACCAC	64	2.46154
GATTATGTTGGAACACCTGA	64	2.46154
GGCCATACGCGGGCAGCAGG	64	2.46154
GTTTGTGTCAACCTTTCCTC	64	2.46154
GAGTTAGGTACCATTCCGTA	64	2.46154
GTGTTCTTGTGATCCTGTTT	64	2.46154
TAGGGTAATCACGCCACAAC	64	2.46154
GTATGGAAGCATTTGAAGTT	64	2.46154
GAAAAATGGGCGCAGCTCAG	64	2.46154
GGACAAAGAGGGAGTCAAGT	64	2.46154
TGATTGAGAAAAAGGTCCAG	64	2.46154
GAGCTTTCCAACGCCGCAAA	64	2.46154
TGACAGGCACCCAGCTCGAG	64	2.46154
GTTGAGCAGTGTTATCTACC	64	2.46154
TTGTGAAGAGCCACTTCCTG	64	2.46154
TTCTTCTAGACCCATGATAC	64	2.46154
CAGGTTTCTGAGGAGATGTC	64	2.46154
CTAACATCACAACTGGTCTG	64	2.46154
GGTACCTCGGGAATCTCATC	64	2.46154
AGGGGTTTTGGTGGTTTGAC	64	2.46154
CCAGACCAGCATACCTCCTT	64	2.46154
CCAAAGGAGGTATGCTGGTC	64	2.46154
AGGGTATGTCCAGAAGGGGA	64	2.46154
CTGAAGGGTATGTCCAGAAG	64	2.46154
TAATCGTAAAGGCTTTTGAT	64	2.46154
TAGTGGGGGATTCATCAACA	64	2.46154
TAGAAATTCAAACATGCATC	64	2.46154
AATCCCCTCAGTCGCCGGAC	64	2.46154
TTGATGGTGTCTGTAGCAAC	64	2.46154
CTGTCTAAGGATAAGGCTCA	64	2.46154
CTTCAATCGGTTGGTGAGCA	64	2.46154
ACCTTTGCGTTTGTTGAAGA	64	2.46154
AGATTCATCCCAGGGTATTC	64	2.46154
AGTTTATCTTGGGTGCTCTA	64	2.46154
TAAGGATAGCCTTAAAGCAA	64	2.46154
CTATCCAATTTTCCCCAATT	64	2.46154
TCAGCTGAGAAAGTATATTT	64	2.46154
TACCCATTCCCATAATTTAC	64	2.46154
GGAAGATGGATGGGTTAGAG	64	2.46154
ATATCTCGATAATTTTGTGG	64	2.46154
ATCATTGATCAGTAAGAATC	64	2.46154
ATCAATTGGAAAGAGAATAC	64	2.46154
GAAGTGGAGGAGGTCTGAAC	64	2.46154
AAGTGGAGGAGGTCTGAACA	64	2.46154
AGATGGCTTGATGATGGTAT	64	2.46154
TTGTTGTATCTCCATGAATT	64	2.46154
GTGCCCCTGAGAAAGTCTTC	64	2.46154
ACACATTCAAACACACCTAA	64	2.46154
ATAGGGAGAAGCTTTTGGAA	64	2.46154
CTTGTGATGAAATGAGGTTG	64	2.46154
AACGAGTTTTAACTCTGCTT	64	2.46154
TTGGATTTCTCGAACGATGG	64	2.46154
TCCATTTGGTCAAGATTTCA	64	2.46154
TTGATTTCAGAGAGGATGAA	64	2.46154
GAGGGGTATGTAGAAGTAAA	64	2.46154
AGACCCCGAGGTAACAGAAG	64	2.46154
GAGAAGGCACCAGACTCTAC	64	2.46154
GAGGGATGTTTTTGGATGAT	64	2.46154
CTAAACTTCCTAAACATCAA	64	2.46154
ACCAGTGGTCAGGCTGCCAG	64	2.46154
TTGTAGTTAAGTGGGATATT	64	2.46154
CCGAGGTTGCACGACTCTAA	64	2.46154
CGAGAATTTCGACCGAATGA	64	2.46154
CAGGGGGCTGTGGAAGGCGC	64	2.46154
CAGTTGTGTTTGCTTTACTG	64	2.46154
AATTCGATATGAACCTCCTA	64	2.46154
AAGTTGTGAAAGAGGGGTTT	64	2.46154
TGAAGGTCAGGAATCTAGTG	64	2.46154
AAATTTTGGGGTATGACAGG	64	2.46154
TGAAGTTTTTGAAGGTGGTA	64	2.46154
GAGTTTTCCATGGATAAAAG	64	2.46154
AAGTTTTTGAAGGTGGTATG	64	2.46154
TCATTTATCTCAGTCTTCAG	64	2.46154
TGGAGATTTGGGCTTTTGTA	64	2.46154
TTCTGATTACGCGAAAGCGA	64	2.46154
GAAGTTAACTAGTGGTATTT	64	2.46154
GACACATGATTTAGAGTTGG	64	2.46154
GGGTTTAGTGACTACTACTT	64	2.46154
CAATGATGCATGATACTGCT	64	2.46154
GACTCATCAGTATGGTACAA	64	2.46154
TGAGATAACGGGATAAAATT	64	2.46154
AGCTCAGTTGATCGGTACCA	64	2.46154
GCAGACCATTGGTGATGATA	64	2.46154
GGAATATAAGTATCCTGCTG	64	2.46154
CACAGAATTGGCGACTCTGC	64	2.46154
TTTGAATCGCGAGTAAGAGT	64	2.46154
GTATTGAGAAATAGCAATGT	64	2.46154
CGGTGCCGAAGTGTTCTATA	64	2.46154
AGCCAGTTCACGCCACCTTT	64	2.46154
GAGGACCTCGCCAAGGCGTG	64	2.46154
TCATCTCTAGGGGGGCCACT	64	2.46154
AGGAGCATGCCGACAGGTTT	64	2.46154
AGATACAACGACTGTATTAT	64	2.46154
AAGGCTTGCATGAATCTCAT	64	2.46154
CATTCGGTGAACCGTCCATT	64	2.46154
GTCTCAGATGCCAAAGAATA	64	2.46154
CAGAGAAGAAAACAATCTAG	64	2.46154
ATTGACTGGTAGTCATCTAT	64	2.46154
GTCCATGGATTCACAAAGCA	64	2.46154
CGTCCATGGATTCACAAAGC	64	2.46154
GAGGCACCTGATTGTTCTCA	64	2.46154
GGTGCAATACACAAATGTTG	64	2.46154
GTGATATGCACACCTCGCAT	64	2.46154
GCCATGGTGGTATAAACCAG	64	2.46154
TATAGCATTGGTTGAGTTTT	64	2.46154
CCAACGTCAATAAGTTCTCT	64	2.46154
TGATGGGAGAAAATTGTATA	64	2.46154
ATAGCAAATGTCTAGTTCAA	64	2.46154
AGGGGATTTCGACTTCGATT	64	2.46154
AAAGTGATCTGGAATACTTG	64	2.46154
AGTTGTAGGACTCGTTGGGT	64	2.46154
CCAAGTCATGAGGGCACCTC	64	2.46154
GGTGGGCAAAATGAGATTGG	64	2.46154
TTGATGAGGGGCAGATGGTT	64	2.46154
CTTGTTGTAGGCTTGAGGTC	64	2.46154
TTGGCCATTGAATGCCCATT	64	2.46154
CGCACTGAGTTGGAAGCTGG	64	2.46154
AAGTTGAAGTATCCAGCAGG	64	2.46154
AGCTCAGACGATCGAAATTA	64	2.46154
TGTCCATAGGCTAATCGAAA	64	2.46154
TTTCGGTCTATGCCTACTCC	64	2.46154
ACTTTTCCCCACATATCAGC	64	2.46154
TGCACACATGACTCATTTAA	64	2.46154
AAGACAGAAAAGCAAGTAAG	64	2.46154
TGGTGCAGGTGGTACGCGTA	64	2.46154
GAAGTGGGATAATATTTCTA	64	2.46154
AGAAATATGACTCACAACCG	64	2.46154
TCTGGAGTTTTGAACTTTGG	64	2.46154
TCCAAGTGATCTTACCCCAG	64	2.46154
CCCTAATTTCGGTCGAGCTT	64	2.46154
AGCAGGGAGAACAGATGTGG	64	2.46154
AGGCGTAGAGGACCTCGCCA	64	2.46154
AGTTTCGGGACTGGTATATG	64	2.46154
TATCTGAGATAGACGTTCGT	64	2.46154
TCCCTTTAGGGAGAACTACG	64	2.46154
ACATTAGTCATCTGTTGTAC	64	2.46154
TTGGTAACAACTTCACCTGT	64	2.46154
TGATGCCATGAAACACCCTG	64	2.46154
TCATCTCTAAAGGGTTGCTC	64	2.46154
CCTTTAGAGATGAAGAGTCT	64	2.46154
GTGGGGGAATCACTGTTGGC	64	2.46154
GCTAGATGTGAGTTTCATTC	64	2.46154
CCAGAGGATCCTTTCTCAAC	64	2.46154
GAAGTATAAGGGATAGGGCC	64	2.46154
AACTTGGGCTGTTTTTAGAA	64	2.46154
GCCAAGAATTCCAGATGCAT	64	2.46154
TTGTGACCTTTGGATTTAGG	64	2.46154
CCATCAGAGAGAAACCACTC	64	2.46154
AAGTGGTTGCTAATGCGTTC	64	2.46154
GCAAGATTGTTAGATAGCTT	64	2.46154
AGGATCACATGAATCATTCA	64	2.46154
ATCCATGTAGTTCTCCCTAA	64	2.46154
CCCCTTTAGGGAGAACTACA	64	2.46154
GACTTCTTATCCTGAATGGG	64	2.46154
TCAACTAACAAAAGTTTTGG	64	2.46154
TTTTGTGGGCAAAGTGAATT	64	2.46154
ACTATTCCATAATGATTCCA	64	2.46154
GAGGTTTAAACTCTGTTGGG	64	2.46154
ACGAGATCGAAGAGCTGCAG	64	2.46154
TGTTCAAAAGGCATTGCAGG	64	2.46154
TATTCTGGGTGGTTCGACCA	64	2.46154
AGTGGTTATGGAGGTGGAAT	64	2.46154
TCGATTTGGTACCAGGTACG	64	2.46154
GAAGAACTGTGAGGCCATTT	64	2.46154
GCATAATCATGAAAGTCGCA	64	2.46154
ATAATTTTAGTTCCAGAGCA	64	2.46154
GAGAAGGTTTGTTGAGAGAA	64	2.46154
ATGGGGTAAAGGTGAACTAA	64	2.46154
ATTATCAAAAGCTCTTTGCT	64	2.46154
ACTCTACTGGGGAATTGGTG	64	2.46154
ACAATATCGGTGTCCAACCT	64	2.46154
AGGGAGATGAAGTTTTGAAC	64	2.46154
CACTTGCCCTAGAATCATTA	64	2.46154
AGGGTAGCAGCATGGATCAG	64	2.46154
GGAGAGGGAAATCATCCTTT	64	2.46154
ATTCCATATACCAATGAGAA	64	2.46154
AATGAATGGAGCAGTCGAAG	64	2.46154
AGGAATAAAACCAGCACCGT	64	2.46154
CACAATAACAGATGATGATG	64	2.46154
ACATACTTCAACTTTGTTGT	64	2.46154
TTAAATAAGATGGGGACAAA	64	2.46154
GGGTTTGGAGGTTTTGGGAT	64	2.46154
ATAAGGTATAACAACCACAA	64	2.46154
TCCCTTTCTGGCGGCACATC	64	2.46154
AGTGATCCATATCTCAAAAT	64	2.46154
TTGACATTTGTGGCACGTAC	64	2.46154
ATGGGGAAATCTTGTCCACG	64	2.46154
TCCATCCCCTCAAAACAGAT	64	2.46154
TAGCTTCCCAACGCCGTGAA	64	2.46154
TTTTTCTGATAACTCGCGAA	64	2.46154
CCCCTCACACAGATGTCAAA	64	2.46154
AAGGCCTGGCATGTCTTGGT	64	2.46154
TGAAGGTCTTAACGGCTGAA	64	2.46154
TTTCTGAATACATCCGATTG	64	2.46154
AGACCACGTTTATCACCCCG	64	2.46154
GACCACGTTTATCACCCCGT	64	2.46154
CCAATCCTCTTAAAATAAAG	64	2.46154
GGTGGATACCGAATTTGACG	64	2.46154
TCTTGAACCTTGTTCTTCAA	64	2.46154
CTTGATTCTATTCTTGACCT	64	2.46154
TTGATTCTATTCTTGACCTA	64	2.46154
AGGATTGGGAATTAGGGTTT	64	2.46154
CTAATTCAAGATCATGAGTA	64	2.46154
TACCATACACCAATGAGAAA	64	2.46154
ATTTGACTGCTGATGATTCT	64	2.46154
GACACATCTTAACAAGTCGT	64	2.46154
ACACATCTTAACAAGTCGTT	64	2.46154
TAAGAACTTGGCTGTGAAAC	64	2.46154
GTACTATCCCGAAGATGTGA	64	2.46154
TTGAACCTGGGGAACGACGA	64	2.46154
CCGAAAAGAGTTGGAGTTGA	64	2.46154
AAGCTAAAGCAATTTGTCGA	64	2.46154
GAAATTCAAGCTGTTTCAAA	64	2.46154
TGAAATGACGGTGGAAGAAT	64	2.46154
AAGTTTTCCATTAGAGAAGT	64	2.46154
AAAACTACAAAAGGTTCTTC	64	2.46154
AAAACTCAGGACAGTGCTTT	64	2.46154
ACCGATATGTGGAAGTGGGA	64	2.46154
AGAGAAACTGTCTGAAGAGA	64	2.46154
GAATTTTGAGATAGGGCCAA	64	2.46154
TGGTGCATTAGAGGTCCAAA	64	2.46154
GTGCTGGAAAATGTGACAAA	64	2.46154
CGTAACACTCAATCTCTTTG	64	2.46154
TACCATCTGTGATCTCTCCT	64	2.46154
CATATCAGTCTCCAGTTCAG	64	2.46154
ATTCAGAAACTACAGATAGA	64	2.46154
TCAAAGATGGAGGTAGGAGA	64	2.46154
CGAAGGGCGAAGTCACAATA	64	2.46154
GGAGCGGTTAAGAAACCATT	64	2.46154
AGCTTGACTTCCACAGAAAA	64	2.46154
GTTCGATAGCTTCAATGAGT	64	2.46154
AGCTAACTCTTTTACTCTGT	64	2.46154
GCTAACTCTTTTACTCTGTG	64	2.46154
GCAGGTACTGTAGCTGAATG	64	2.46154
TTTGCATATGTCGACATTGA	64	2.46154
TTTTGAAGTCAAATTGGTGT	64	2.46154
TTGTGTAATTTGGTGAAGTA	64	2.46154
CCGACTAATTTACTAAGTGT	64	2.46154
TCTGAGCCATCATCTCTATC	64	2.46154
ATGGAATTGGTCTTCACATT	64	2.46154
CACTTTACCACCCATATATT	64	2.46154
ACACTTTACCACCCATATAT	64	2.46154
AACATTGGAGAGACTTTCTG	64	2.46154
GAAGTTCCCCCACGAACCCT	64	2.46154
TATTCGACTAAGATAGTACA	64	2.46154
TTTGACTTGAATTACCATCC	64	2.46154
TTTTCAAAGGAAGTGGTTGA	64	2.46154
TTTTCAAAGCAAGTCCAAGA	64	2.46154
ACCCACTCATAATTGAAGGT	64	2.46154
CATTCCAGCTGTGATAGTTC	64	2.46154
GTTTAAGACCTTCGACTAAG	64	2.46154
TCTCTTGCCTCAATCCGAAT	64	2.46154
ATGATGTTTTCCTCGGGTCG	64	2.46154
TGATGGACTGCCTGTCAAAA	64	2.46154
AAGGTGGTACGCGTATGGGA	64	2.46154
AGTTATCTAAGTGTGAATTC	64	2.46154
GGAATGCTCGCGTCGAGTCT	64	2.46154
AGCTCACCAACCAAACATGG	64	2.46154
TACACATATCAAGCAAATAC	64	2.46154
GGGAACCGAGTTCCTTATTA	64	2.46154
ATCACGGAAAATGAAAATGC	64	2.46154
TGCGTGTTTTTGGATTAATC	64	2.46154
ACGCTTTCTTTCTGTACGCT	64	2.46154
GTATGTGAGGAGAAGCTGTT	64	2.46154
CCCAAAAAATGGGCGCAGCT	64	2.46154
ATCGCAAGTCAGGTCTACAG	64	2.46154
TTCCTTGGTCATGTTATTTC	64	2.46154
AACACTGCATCAAATTTAGA	64	2.46154
CTTGTTGAGGTCGTGTGTAT	64	2.46154
GAGAGATGTTGACAGTAGGG	64	2.46154
GTAAGATGTCGATGTTTGAA	64	2.46154
TCCAGAATCGCAACTGTGCC	64	2.46154
AACACTCAGCCTTCATTACT	64	2.46154
TTCAGAATATGTCGTATGCT	64	2.46154
TCACCACCATCACTACCATC	64	2.46154
TGAAACTAACTCTGTTTTTC	64	2.46154
AGACCACTTTGATAAAGAGT	64	2.46154
AAAAGGCCATGGCTTAATAA	64	2.46154
GGAAAGGATTTCAGCCTATT	64	2.46154
TATGGCTCAGCTGGCTGATA	64	2.46154
ATATGGCTCAGCTGGCTGAT	64	2.46154
TCTCCAACTTTGTTTAATCA	64	2.46154
TGCCTCTTGGTAACCAGTGG	64	2.46154
CTCCTCCACTGGTTACCAAG	64	2.46154
TACGATCAACCAAAATATTC	64	2.46154
GGAACCGGGTTCCACTCTTA	64	2.46154
GTTTACAAGGAATGATGTCT	64	2.46154
TCTGGTGGTACGCGTATGAG	64	2.46154
TCCCTCTTAAAGGAGTCTAC	64	2.46154
GACCCGTAGACTCCTTTAAG	64	2.46154
TGACTCTGATGAAGTGTTTG	64	2.46154
GGTTGATTGTCCACCAGAGG	64	2.46154
GGAGCGGCTGACTTCTGCTG	64	2.46154
GATGAAGGGGTGGTTGCTGC	64	2.46154
ACTCGACAATGTCATGCATG	64	2.46154
GGGACTTTCGCTGAGCGAAG	64	2.46154
GGGGACTTTCGCTGAGCGAA	64	2.46154
TAAGGGACTGGATGGAACAT	64	2.46154
ATCCAACTCTATAACCACAT	64	2.46154
CATCCAACTCTATAACCACA	64	2.46154
GGAGCAGCAATACTGTTGTG	64	2.46154
ACTGTGAAAGATGTCCTTGA	64	2.46154
CAACACGATCGAATAGTTAG	64	2.46154
AAATGTGACGAAGTGAGGTT	64	2.46154
AAAAGGCATCAGACTCTACT	64	2.46154
GATACACTGGGTCATAGAAC	64	2.46154
ATGGAAAGAAAAGTCGACTC	64	2.46154
AGCTTGGAACTTAGAGATGG	64	2.46154
CAAGGCTACCATCAACCAGA	64	2.46154
GTCGTCGTTGTATGTTGTGC	64	2.46154
AGTAACCGTTGAAAAGTCAT	64	2.46154
TGTCTGATCACACTTGTCTG	64	2.46154
GTCGTTTAATAAGTCGCAAC	64	2.46154
GAAACTGCAATCAGACAGAA	64	2.46154
AGTCAACGTCAGATCTACTA	64	2.46154
TTTTTCTGAGAATTTTGGCA	64	2.46154
AGAAGAAGATGAACAGTGCT	64	2.46154
GACGAATCGTTTCTTGAATT	64	2.46154
AGGGAATTTCTGGTGTGGAC	64	2.46154
GCATGCATTTGAGTCAATTG	64	2.46154
ACGCTGACAAGCGACATCAC	64	2.46154
GCTGACAAGCGACATCACTG	64	2.46154
TAGGTGTCTCCTAATAATGT	64	2.46154
TATACCAGATAAGAGGAGAA	64	2.46154
CCAGCAGAGTTTGTGATACC	64	2.46154
CTTCAGAGCTCGACCAACAC	64	2.46154
GGAAGGTTTGCAAAAGGCTT	64	2.46154
GTTGCACATGTCGATGTTGA	64	2.46154
CCGCGCGAACTGAAGCGAGC	64	2.46154
TAATCCTGAAGAACCTTTTA	64	2.46154
GGTTGGACCACGAGTCTGAT	64	2.46154
ATTCCCAATCTTGATGTCAT	64	2.46154
ACTGATGTTGTCCCTTTCAG	64	2.46154
CATCTGTCTAAATCTGTTTG	64	2.46154
CAAGACTCAACGGTTTGCCA	64	2.46154
GGGGCACACGTGAGATAGGA	64	2.46154
AAGACAGGTTTCCACAACAA	64	2.46154
GAACACCTTTTGCTGTGTCG	64	2.46154
TATCTTTGAACGCTTGAATT	64	2.46154
AGGATGAAGAATGAAGTTTA	64	2.46154
ACCCATTGCTTCTTAACAGT	64	2.46154
TTACATCAGTGTATCCAGAG	64	2.46154
TGCAATACAAAGTTCAAAAG	64	2.46154
TGTCCAGAGTTTCTGAAAGG	64	2.46154
ATACCCACCTCCTATCTCAA	64	2.46154
GTGGAAAGCACATGTGACAT	64	2.46154
ACAACTCTCTACTTCAAAAC	64	2.46154
CTCTTTTCCCCAGTAGAGTT	64	2.46154
ATGAGTTGTTTAAGGCGGGA	64	2.46154
TTAACATCACAACTCGTCTG	64	2.46154
TGATGATGAGCTGGACGATA	64	2.46154
GATATCGTTAATCTATCCCT	64	2.46154
GAGTGGAATGGCTCATGGTT	64	2.46154
GTCCAAAGAGCAGAGATAGT	64	2.46154
ACACCATTTACAATGCTCAT	64	2.46154
ATTGCAATGTGTAAGATGGA	64	2.46154
ATTCATTGCAATGTGTAAGA	64	2.46154
AAGGTGAAAACTTCGATTTC	64	2.46154
AGAAGGAGAAAAGGCAAAAG	64	2.46154
GTCTACACAACTTGAGATTC	64	2.46154
CTAAAAAGGATGGAAAAGTA	64	2.46154
CCAGAAATTGAAATTTGTCA	64	2.46154
GAACATGGGTGGTCAGAACA	64	2.46154
CTCTGATTCCTTTACACCCG	64	2.46154
AGGACCTATCGCATGTGGAG	64	2.46154
GGAGATGGCCTCTCTGCTTG	64	2.46154
AATGGAATAGTGGTCGGCAG	64	2.46154
CTAAGTTTCATAGTTGTTGC	64	2.46154
ATGTTTTCCTTCACGTCCCC	64	2.46154
GGTCAAACATGTCATAGAAT	64	2.46154
CAAGGCATTTAGGATGGCCA	64	2.46154
GAGTTCCTTGATTTGAAGCA	64	2.46154
TTACATGTTCCCTTAGGAGT	64	2.46154
TGGATGAAGCATATGTGACA	64	2.46154
GGATGAAGCATATGTGACAT	64	2.46154
AGGTAGTTCAAAAAGGAACT	64	2.46154
GTCCTCTTTAAAAGATGCTA	64	2.46154
GAGTCTCAGAACATAGTAAC	64	2.46154
GGTTGTTGCTGTGGACGAGG	64	2.46154
GTTCACTACAGAAAGGGAAA	64	2.46154
TAAAAAAGGGCGCAGCTCAG	64	2.46154
TTCCAGGTAGCCTCCTTCCT	64	2.46154
AGGAACAAAACCGGCGTCGT	64	2.46154
TTGATCCTTTGAGGTTCCGC	64	2.46154
AAAGTTCTCACATTCGCACA	64	2.46154
CGAAAAATCATCTTTAGGGC	64	2.46154
AATTCTATGGGGTGTGTATT	64	2.46154
CTTCTTCTTCTTCTACTAAA	64	2.46154
GCATGGATGGAGAAGAGTTG	64	2.46154
CTTTCAAGTTCAAGCCAATC	64	2.46154
ACTCACCCAGAACACGAAAC	64	2.46154
AGTAGAGGCAACCAAAATAG	64	2.46154
TGAAATTCAGGTTCGGGAGT	64	2.46154
CTATTGAGTTTTGAATCCAT	64	2.46154
CAGATAAAACTTGAAGAACA	64	2.46154
GTCAATTTGAGATGGTGTGA	64	2.46154
GGAGTTGTTTTGAGGGTAAG	64	2.46154
TTGGATCAAACTTCCTTTCC	64	2.46154
TGTAGTTCGCTGAGCGAAGA	64	2.46154
ACCCCATCTTAGCCTTATAT	64	2.46154
TCTTGCTTTTGCCCTTGATT	64	2.46154
CGTACTTGGAGAAGAGAGTT	64	2.46154
ATGGTCTCTCCTAACTACCA	64	2.46154
AACAAAGTGAACAAGCATAA	64	2.46154
TTGGCAAACTCTTTTCCAAG	64	2.46154
AGAGACGAACACCCATGCGA	64	2.46154
TATAAGTATTTTGTTCAGGG	64	2.46154
GTATGGTATTTGGATGGGTG	64	2.46154
ATTGTCAAGAAAGCCTTCTC	64	2.46154
CCTATGTAATTTAGGGTTTT	64	2.46154
CAAGATCAAGTGGGACAATG	64	2.46154
AAAGAGGATAGGGCAATTTT	64	2.46154
ATATTGCTGTCTTCACCAGA	64	2.46154
GTTGACGCGTATAACATGAT	64	2.46154
AATGACATTGTCGAGGGATT	64	2.46154
TTCAACGGCTAATTTCTATG	64	2.46154
TATCACTTGTGGTCGTTGGT	64	2.46154
GGGTGAAAGCCAAAGCCATT	64	2.46154
GGTTCATGGTTTATGAACAA	64	2.46154
ATCACAAAGGTTCAAACACT	64	2.46154
GAGATGTTCTAAAAGTGATA	64	2.46154
CCTCTAAAATCAATCAGCTG	64	2.46154
TTCCTCCTCCTTTTAGGGTA	64	2.46154
GGTTGACCGCCTATCCGCTA	64	2.46154
GTTGGAGCATCTCTAGAAGC	64	2.46154
CTTAAATAGAGCAAGCCCAA	64	2.46154
GAGGACATTGCGCCTTTTCG	64	2.46154
GGTGGTTGTCGAACAGGCGC	64	2.46154
ATTTATCCAAAGAGAGGGAA	64	2.46154
AATTCTTGGAGCTGAAGCAG	64	2.46154
AAAACCCTCATCTTAACCCG	64	2.46154
CATTCCACTTGTTTGTGAAC	64	2.46154
CGAAGAAAATACTCAAGAAA	64	2.46154
AAAGGAATGGAAATGGAGTT	64	2.46154
AAGGAATGGAAATGGAGTTA	64	2.46154
TTTTGTAGTTGTGTACGGTT	64	2.46154
GATTAACACATGGGGTTAAC	64	2.46154
GGTCTTCTTTCAAATCCAAC	64	2.46154
AAGGAGGTACTTGAATTCTT	64	2.46154
AAAGGAGGTACTTGAATTCT	64	2.46154
TGGGGAAGAATTGTCCAAGG	64	2.46154
ACAGTTACAGAGTTTGACCC	64	2.46154
TTGATTCTATCCTTGGTTTA	64	2.46154
TACAAAGCTCCTATCTGGAA	64	2.46154
AAGTTATCACCTTTCCAGAT	64	2.46154
TAAAAAGGTTTTGCCATCTG	64	2.46154
GAATGGTCCTTTAGATGAAG	64	2.46154
AACAAACTCAATATTGTGAG	64	2.46154
TAGAAACTTCCCTATTCTGT	64	2.46154
TTCGACTGTTGTTGTTTTTG	64	2.46154
ACGGTGTTTAAAGGGGGTAA	64	2.46154
CTCTTGGTTTGAAGTGGAAG	64	2.46154
TAAACACTAGACTAAGCTGG	64	2.46154
TGTAAAAGAGGTCAAGATAG	64	2.46154
TCCCCCTTTTTAGCCACAAA	64	2.46154
AAACTCTTGAGAAGAGATTA	64	2.46154
AAAGCCACGCCCAAACCACT	64	2.46154
GGAAATGGCTGATATGGAGG	64	2.46154
TTCCATGTTCAAGGTCAAGT	64	2.46154
TCCATTATGACTCTTAGAGA	64	2.46154
CCGCAATCTTAACATGGGGC	64	2.46154
TTTCCAGGACAGCTTGGCAG	64	2.46154
AAAAGAAGAAAAGAAGTCTG	64	2.46154
GGAAGAGTGTTTGCTTTGAG	64	2.46154
AACAACACCAGTGCACCCCA	64	2.46154
CATAACTTTGAAGGTATTCG	64	2.46154
TGGTATGTAATTCTCTACTG	64	2.46154
AAGCTCTTCGTCATCATTTG	64	2.46154
TGCCTGGAAAGGTACTTCAA	64	2.46154
TCTGAACAGGGGTTTAGGAA	64	2.46154
ATTAGGGAAGGACCAGCAAT	64	2.46154
GCCAGTCAATTGTTTGCCTA	64	2.46154
TGGAGTTTTGGGTGAATTAT	64	2.46154
CCGGATACGACTCCTTCATC	64	2.46154
GTAACTTTTAGAACCTTGTT	64	2.46154
CTAATGTGTCTCTCTTCCTC	64	2.46154
ATTGGTATGATCTTCAGAGA	64	2.46154
GTATCCATTGTAAAACAGTT	64	2.46154
CCAGGAATCATAAGACTATG	64	2.46154
AACCTAAGCCAGATAGCCGG	64	2.46154
TTGATTTGTATTCCGTTGGC	64	2.46154
AGAGCATCTCCCAGCAGGGT	64	2.46154
CGTTGTCACTTTCAGGCTTT	64	2.46154
AAAGCTAGGGTTGTTGGAGA	64	2.46154
ATGACGAATCGACTCAAATA	64	2.46154
TAACTTCAATGCAGTTAATC	64	2.46154
GAGGAAGTTATAAGCAAAAA	64	2.46154
CTCTTTCCTGACCCTCTCCA	64	2.46154
AAGTCAGTTGGGATTCTGGT	64	2.46154
ATAGGTCACTTTGCAATTTC	64	2.46154
GAAAGGGAAAGGAAAACACT	64	2.46154
TTGAATGGGAAAAGCCCAAG	64	2.46154
TACCTTTGCTCTGTTTTGTA	64	2.46154
AAGATGGTGGTTGTACTATT	64	2.46154
TCAGTGTCGGAAATGCGACG	64	2.46154
ATAAATTGGTCTTACAGGCC	64	2.46154
ACTTCGGTCTAGTGTTGATT	64	2.46154
AAGTGAAATGATGAAGGATG	64	2.46154
ACGGTTAAGTACATGATTAG	64	2.46154
TAAACTTTCAAAATCCAGAC	64	2.46154
GAATTGGAGTTTTGGGGTAG	64	2.46154
TTGGGATGGAATCTAAGGGT	64	2.46154
CAAGCGTGCATTCGACAAAA	64	2.46154
ACAGACAAAAGCTCTTTGTG	64	2.46154
TAGGTGTTTTGGAGAGGGGC	64	2.46154
TAGGCTCAAGGGGTTGGCAA	64	2.46154
CCCCGCAAGGTATGTACTAA	64	2.46154
TCTTTGAAAGTGAGGCTTTT	64	2.46154
GATGTGTTGATTGAACTGTT	64	2.46154
TCCAAACAGTAGTAAAAGCC	64	2.46154
CCAAGAAAGAATGATAATGG	64	2.46154
CAATCAAAAGAGGAGATTAA	64	2.46154
TCGAATGTGGAGAGCTTCAC	64	2.46154
ATAGGTTTAACCGATTAACA	64	2.46154
TTTCCCTTGAATACCTATGG	64	2.46154
GAGGTGGTCTGACAGATTGA	64	2.46154
AAGTGCAAGATGACAAGCCT	64	2.46154
CTGGAACTCTTGTGCGTGGC	64	2.46154
ACGGAGCCGGACGGAGATAG	64	2.46154
GGCTTTGTTATCCACAAAAA	64	2.46154
ATTAAAATCTTAGCTAGCTC	64	2.46154
TGATGCAAAACAATACGTGT	64	2.46154
GTTAACCCTAGAACTTACCT	64	2.46154
TAATCAGATTGTGGTTAATC	64	2.46154
ACACTTCATATATGCCAAAT	64	2.46154
AGGTACAGGCGAGATGGTTG	64	2.46154
CTGAACAGGGCTTTGTCCCT	64	2.46154
TCCTGGTTTCCAGAATTACA	64	2.46154
GTTAAGTTTAGTAAAGACCT	64	2.46154
TGGCTTCCAAAATTATATGG	64	2.46154
TGGTGGTCGTTCACCATCCA	64	2.46154
GACGAAGAGCTCTGAAAGAC	64	2.46154
CAAGTTCTTCATGAATCCTC	64	2.46154
CAACTCTGGAATCTGGAAAA	64	2.46154
ACAAGATTGTTCTTGCTTTG	64	2.46154
TGGATTATGTGTTGATGATA	64	2.46154
AGAGGTTTCACCACAGGTAT	64	2.46154
CCTCCATCATCATTCTTTCA	64	2.46154
TCAATTCCAACAGCTTTGTA	64	2.46154
AGTGTATAGAATCTTGGTGT	64	2.46154
CGGCTCACTTTAAAAACAGT	64	2.46154
ATTGTGTGCAATTCACTTGC	64	2.46154
ATTTTGCACTTGAACTTGGT	64	2.46154
GTGACGTCAAACCAAATCCT	64	2.46154
AACACGCAAAAACGCATAAA	64	2.46154
AGTAATCATGTTAATGGACT	64	2.46154
TTGGAGGCCGAATGTTCGTT	64	2.46154
AGGCTACAATCAGATAAAAA	64	2.46154
GAGAGCTCCGTGCTAGGTGA	64	2.46154
AGGAAGTATGTTAGCATAAG	64	2.46154
GTATGAGTATAATGCTGAAT	64	2.46154
GAAATTTGACCAAACAACCT	64	2.46154
GAAAGTGTTAATGGCAACAT	64	2.46154
ACATATCATGAGCTGTGTCA	64	2.46154
TACTATCGACAAGGGATTAA	64	2.46154
GTCACGGGCACGACAATCAC	64	2.46154
TCATCACTAGACCGAAGTCC	64	2.46154
TTGTAACTGATTTTGGAAAG	64	2.46154
TTTTGGTAGGAACTTCGGAA	64	2.46154
ATATTCTTTCTTTTCTGGCC	64	2.46154
TATTCTTTCTTTTCTGGCCT	64	2.46154
TTAGGGTTTCCTTTGTTTAA	64	2.46154
GTGGGCACCTTAAACTTATG	64	2.46154
GTCTATGATGGGACATATAT	64	2.46154
TATGCATAACCAAGTCTCTG	64	2.46154
GCTGCAGTTTTCAGTTCTTT	64	2.46154
CTGAGAAAAACCAATTGAAA	64	2.46154
CAAAGTAGGGTGGGTTAGGG	64	2.46154
TCCAAGTCCAGATATTTAAT	64	2.46154
CCAAGTCCAGATATTTAATT	64	2.46154
CAATAATGTTGTCAATAGGA	64	2.46154
AGAACGGAATTCCCCTTCAT	64	2.46154
AACGGAATTCCCCTTCATTG	64	2.46154
TGAATCCACTTTTTCACGTT	64	2.46154
TGAATGATGAAACTTGAACT	64	2.46154
ACCGAGAAGTGAAGATTCTG	64	2.46154
GGAAGATTCTTTAACTCAGG	64	2.46154
TGGAAGCAGTTGGTTCAATG	64	2.46154
CAAAGGCAAAACCTAGGACT	64	2.46154
AAAGAAAGAGATCGAGTTCT	64	2.46154
TCCCAGAAAACTTCTGATCT	64	2.46154
GGGCATATCTTGTGACAGCT	64	2.46154
GGCATATCTTGTGACAGCTA	64	2.46154
CCATCCAAATCTGTATCAGC	64	2.46154
GTAGAAAAAGTGTTTTCCAC	64	2.46154
GGATGTCTCAATAATACAAT	64	2.46154
GCAAACATGGTCAAGTTGGA	64	2.46154
GGCTGGGAATGTGATGAGTG	64	2.46154
GATGGATGAGATTTCATGAC	64	2.46154
TTTTGTGAAAGTTGGGGTTT	64	2.46154
TCTGGCCCCTCTTCAGGAAG	64	2.46154
AAGGAAGAGAAAAAAGAAGA	64	2.46154
ATTTTGAGGATGGGACCAAT	64	2.46154
CTTATCTGTAGAAGTCAAGT	64	2.46154
TCTTCAAAATCAAATATGGC	64	2.46154
AGGGAGAGAAGGGTAATTTA	64	2.46154
GGGTGAGGTATTGTGAGGCT	64	2.46154
ATCATTTAGTGGATAGTGGA	64	2.46154
AAACACTGCGTAAACCTGAG	64	2.46154
ACTAGTTCTTTCTCAACGGT	64	2.46154
TGGCTTTGATGCAAATTTAT	64	2.46154
TTAGTCCAAGAGGACGAAAA	64	2.46154
TAAGCGTGTTTGGATTAATC	64	2.46154
AAGAACCGATCTACTGTATT	64	2.46154
GTTACACAAACGTGTTAATT	64	2.46154
TGAGGCTGAGCTGTTGGTGC	64	2.46154
AGGAGCATAAGGATACTTAC	64	2.46154
AAGCACAAGCTCAGACTGTG	64	2.46154
ATACTGAAGATGAATTGTCA	64	2.46154
CTTACGCTATTACAAGGCTT	64	2.46154
AAGAAGTGTGACGGTCGGGG	64	2.46154
ATTCCGCACGGCGGATACGT	64	2.46154
CTTTCCCGGTTTTTCTGACT	64	2.46154
ACCGGGACCTCAGTGGTGGC	64	2.46154
GTGAAGGAAACAAGAGAAGA	64	2.46154
TGTTCTGACCACCCATGTTC	64	2.46154
AGTATATCCTACTCTGGTTA	64	2.46154
CCCATCAGAACATCTGATGT	64	2.46154
GAAGTTAAAATTGAGTGGTT	64	2.46154
CTGAAAGAATTAAGCCTTCG	64	2.46154
GATAACATAGGTATCGAAAT	64	2.46154
TCTGAGGATAGGACTCGGTT	64	2.46154
TCGGTTGGGGATAAGTTTGA	64	2.46154
CTTTTGGGCTCTTTGAGCTT	64	2.46154
TGTTTGATAGACATAGAAGG	64	2.46154
ATTTTCAATGGAACGCTTCT	64	2.46154
GAAAAGCAATCACACCCTGC	64	2.46154
CAGTGTTAGACAATTATATG	64	2.46154
GTTTTGTATCTCACTCTTGA	64	2.46154
ATGGTCTTTTACGTGGAACA	64	2.46154
AATTTGTGTCTTCTCTGATT	64	2.46154
TTTGACATAGTTGGTGTTTT	64	2.46154
AGTTGTTGACCTAAACCTAG	64	2.46154
TTCTTTCGAACGATTTACGC	64	2.46154
ACTCCTGGCATCATGGAATA	64	2.46154
AAACTCCTAGAGTTCGTGAA	64	2.46154
AACTTGGTGGCCAGACAATT	64	2.46154
TCATGGAAGGGAGCCATGAA	64	2.46154
GGATTTCTACTTCAACCGGC	64	2.46154
GGCTGCAGAAAAATCTTTTC	64	2.46154
TCCTCAAAGAATCGGCCTTT	64	2.46154
GAGAATGTGCATGACTTCAC	64	2.46154
GACTCTGATGGTGAAAGAAT	64	2.46154
AAAATGCCCAAAATCTGCCC	64	2.46154
CTTGTTTCTTTTAGGTTGAG	64	2.46154
AAGTCCGAGGTTTCTTGGGA	64	2.46154
ACTGAGATATGCAGTTTTCT	64	2.46154
AAAATTTCTCCAAACTTCCA	64	2.46154
CCGAATAGGCTTAGTTTCAA	64	2.46154
TGAGATTCCTGAGGTTCCGC	64	2.46154
GATCTTGATACCTCCAGTTC	64	2.46154
TCCAAGGGATATCCTCCGCG	64	2.46154
CTCCAAGGGATATCCTCCGC	64	2.46154
TGGGCATGGTTGGAATCGTG	64	2.46154
TCTAGTACATCATTTAGAAG	64	2.46154
GCTTTTACTACTAAAGCGCT	64	2.46154
CAAAAGATCCCTCCAATCAG	64	2.46154
TCAAAAGATCCCTCCAATCA	64	2.46154
GTCAAAAGATCCCTCCAATC	64	2.46154
CCAACTGAGTCCTTAGCTGG	64	2.46154
AGATATGTTTTCACCATGTT	64	2.46154
GGTGCTAAGTGTTTCAAATA	64	2.46154
AGGAATGGTATTTAAAGGTG	64	2.46154
TGGAAACTTGGAATTTTGAT	64	2.46154
TCGACTCTTCAAGGACAGTG	64	2.46154
AGGTATTAGGGATCTGTTTT	64	2.46154
GAAATAACTTGGAAGCTGTT	64	2.46154
TATTTCCCGGAAGATGTCAG	64	2.46154
AGCTAGGGATTTTAGGGTTT	64	2.46154
TTAAGCCACGTTCCAGCTCT	64	2.46154
GGTATGGTTTGCTTAATACT	64	2.46154
TCTACGGTCGAGGCACCTTC	64	2.46154
TGACGTGAGCGGCCATCTTT	64	2.46154
CGGGGGAAACGGCCCATATC	64	2.46154
GTTGGTTTCGCTGGTATGAG	64	2.46154
GTGGATTTTGTCAGATAAAA	64	2.46154
GGAGCTTTTCCTTGTCATCT	64	2.46154
CGAGGGTGAAGATTTGCAGA	64	2.46154
TCGATGAGATGTTGTTGAGG	64	2.46154
CAATTTGACTGAAAGTAAGA	64	2.46154
GAGCCTCAATTCTAGGTGGT	64	2.46154
GAGATTCTCTGAGATCTGAT	64	2.46154
AATGTGATCTCTTCGAAATA	64	2.46154
TCTCTCTAACTCTCGATTCA	64	2.46154
GAAAAGGGATACGATGAAGA	64	2.46154
CACCGAAGGTACACTTGTTA	64	2.46154
ATACTACAAGACTGATGGTG	64	2.46154
AGATTCGTCAGTAATCGATA	64	2.46154
TTGACTGCATCCACATTCAC	64	2.46154
TTACCTGTTTTAACTCTGAA	64	2.46154
GAGATTGTTCGACAATGAAA	64	2.46154
CTTGTCACAACAGGCATGGT	64	2.46154
TTCCAAGAAGAAAGAGGGAG	64	2.46154
GGGACGATTTTGGATGAAAA	64	2.46154
TGGCAAAGTTTCAAAGTCTT	64	2.46154
CGGGCGTGGTAGGCCCATGA	64	2.46154
AGATGGAATGGTGATGGACA	64	2.46154
GGGTTGTTTTGGAATGTGTT	64	2.46154
CATGAAAATACCTCTAAACT	64	2.46154
TAGGGTGGCTGTTGGAGGCT	64	2.46154
GTGACTTTGAGATATAGGCA	64	2.46154
GAGTGATTTGGTCCAAGTTT	64	2.46154
TGGCAAATTTGAGCAATGTT	64	2.46154
TGGTGGTTTGCTAGACTCTT	64	2.46154
TTCACAACTAAGTTCTTGAT	64	2.46154
AATGGGATGCAAGGGCTGTT	64	2.46154
TGCAACATTGGTAAGATCAC	64	2.46154
CCAGCATATGGAAATCTATC	64	2.46154
ACACTCAGCCTTCGTCATTT	64	2.46154
TCAGCCCATTGCTCGTCGTC	64	2.46154
GGCAAATAATCGGTTCAGAA	64	2.46154
AGTATACTACGAATTTTGCT	64	2.46154
TGATTGGGCTGAGTCTATGT	64	2.46154
GGGAAAGTGTAGGGATAATA	64	2.46154
GCTCTGATACGTAAACACTC	64	2.46154
TCCTCGTGCTGTGGGCTTTC	64	2.46154
CATTGTCGACTGAGGTTTGT	64	2.46154
TAATCAACTGAAGAAACTGA	64	2.46154
ACGAAGGCTCTGCTCAGACA	64	2.46154
AGACGTTCATGCATTTCATT	64	2.46154
AGATTTCTGAACGTCTTCTC	64	2.46154
TAGCTGCAGATTGTAGGTTG	64	2.46154
TTGGTGACTGTTTTTGGTCA	64	2.46154
TGACCCCTTATTGCACGAAG	64	2.46154
GAACCTGATGGTAGTGATGG	64	2.46154
ATAGGCACAGGCTTCGTACC	64	2.46154
GGGGGTGCATCAAAGCAACT	64	2.46154
TTTGGTACCCATATGCTAGC	64	2.46154
GGTGTAGGACACTGTTGTGT	64	2.46154
TTGCTATGGAGTTCTAGGGC	64	2.46154
TAGTTCAGATACAGACAAGA	64	2.46154
TAGAAGAAGAGAGAAGTCAA	64	2.46154
ATTGGAAATAATTGTCATGC	64	2.46154
TCTGAAGTATACTTCAGATT	64	2.46154
GTGGGCTAATAACTGGGAAT	64	2.46154
TCAGAAGATTTCCCAGAGGG	64	2.46154
TTTGCCTAAGTCTCCTTGAA	64	2.46154
GATAGTCGGAGGCTATCAAA	64	2.46154
ATAGGTGGTAACAAGATAGG	64	2.46154
CCTGCATGATTGGTATTTTC	64	2.46154
ATAATCCTCAACAGGTTGAT	64	2.46154
CCTTCTGATATGGAGTCATC	64	2.46154
GGGTTCTTTTTGAACCCCAA	64	2.46154
CAAGACTCAGCTGTGGAGAT	64	2.46154
AAGAGGCTCTTTGTTGGTCC	64	2.46154
AGAGGCTCTTTGTTGGTCCA	64	2.46154
TAGACGAAGGATCCCTCCAC	64	2.46154
CATAAACTAACAAACCACAA	64	2.46154
GTGTGAAGAAGGTGATCACA	64	2.46154
ATTCTAGGCGGTTCGACCAT	64	2.46154
TATTCTAGGCGGTTCGACCA	64	2.46154
GGTCGAACCGCCTAGAATAG	64	2.46154
ACATGCTTTTGACATAGGTG	64	2.46154
AACACCTTCCACACTAAGTG	64	2.46154
ATCGCAAGTTAGGTTTACAA	64	2.46154
TCTTTCCAAACTAACCAACC	64	2.46154
TAGAAGGTGTTCACAAGGCT	64	2.46154
ATCATCCTAGATACGACATT	64	2.46154
GCCTGCTAGACCAATTTATT	64	2.46154
ACGGTTCTCCAACTTTCTCC	64	2.46154
ACTTTTTAGGCTTATGGAAA	64	2.46154
TGGGACAGGTCCTTTGTAAA	64	2.46154
CCAACATTCTTTAGCCCGAA	64	2.46154
CTTTGCATTCAATAGAGATG	64	2.46154
TGCATTCAATAGAGATGTGG	64	2.46154
TTGATTGGTTAATTAGTGGG	64	2.46154
GTTGTTTGTTGGGCCGACCC	64	2.46154
TGTGGGATATGAGAATTGGA	64	2.46154
TGGGAGGAAAACCATGCAAG	64	2.46154
TGAGAGCATGACATGGGAGC	64	2.46154
AGATCTTCTGAACTTCTGGA	64	2.46154
GAGGTTTTGAAGGTTAGAGA	64	2.46154
GGAAATTGGATCATACGGAA	64	2.46154
TACCAGCACACGGGATAAAG	64	2.46154
GGAAGCGGCCTCTACCCACT	64	2.46154
TTTTGAGTTTGGCTGATTCT	64	2.46154
GGATTTTGTCCACATTAAGC	64	2.46154
ACAGTGATGGTCAATGGAAC	64	2.46154
TGTTGAAGATCAAGAGGTAG	64	2.46154
AGTCTCAGAACACAGTAACA	64	2.46154
TGTATCCTATCTTCCAAACT	64	2.46154
CTGGTTTGATGGCAGGGTGG	64	2.46154
CTTTCCAAACCATTAGAACT	64	2.46154
GTAAATTGCTCATTGTAAGA	64	2.46154
GTTAAAATAAGGTTGTGTGA	64	2.46154
TTCAATGCCAAGAAGAAAGA	64	2.46154
TGGCTTCCGTAGAATACCCA	64	2.46154
CGGGGCATAAAGCAAAGAGG	64	2.46154
CACTAGGTTTTTCTTTGGGA	64	2.46154
CGATCAAATTCTTCCCAATT	64	2.46154
AAGAGGCCAAGGGAGGAGAA	64	2.46154
GCTGAGGGTTTGGAGGTTTT	64	2.46154
GCTATTGGAAAGGCTGTTTG	64	2.46154
CTTAACACAAACTTCTGAGA	64	2.46154
AGACGGATGGTCAGACAGAG	64	2.46154
CACTAGTCTTAATATGACTT	64	2.46154
TTCTTATGGGTTCATCCTTC	64	2.46154
TTGTGCTCTCATGGCTAGAA	64	2.46154
TACTATATCCATCACTTGAA	64	2.46154
CACACATAGGAGAACATGGT	64	2.46154
TTTGAAGGCATGAATCAAGT	64	2.46154
TTCCAAAGCAAGTACTTTAA	64	2.46154
TTTTGGGTTAAGAGGCTTTT	64	2.46154
TGTGCTGAAAAATGACTCTG	64	2.46154
AGTTTTGAGCTTTTCCTTTG	64	2.46154
GGCGCGAACGTGCCCCTTCG	64	2.46154
TGTTGTGTTAGGAAAGGTTT	64	2.46154
GAATTGGCCATGAGTAAGGC	64	2.46154
CTTCTTCTGAGCATCTGGAG	64	2.46154
GGCAACTGAGGGGTTTGAAG	64	2.46154
GCCAAATGAAAGAGTGAACT	64	2.46154
AGGGTTTGATAGTTTGATTA	64	2.46154
TCCAAGGAATTTTCAAGTTG	64	2.46154
CGTCCAAGGAATTTTCAAGT	64	2.46154
AAAGCAAGGTGTGACGGACG	64	2.46154
TGAAAATGGCTTGTGACGGG	64	2.46154
GAATATGAAGCTTGCATTTT	64	2.46154
AGCATTGCAAGGAATTGGAG	64	2.46154
TTAGACCAAAAGGCATCACA	64	2.46154
ACTTGGAGAAGAGGAGAAGT	64	2.46154
TTGATTATTGGTAGTGGGGG	64	2.46154
AGTATGAGAAATTTGTGCTC	64	2.46154
TACTATTCCTGTGGAACAGC	64	2.46154
GTTAAGGCATTGCATTGGTA	64	2.46154
GGTTAAGGCATTGCATTGGT	64	2.46154
GGAGTTTGGCTCAAGATTTG	64	2.46154
TTGATTTAGAGTAGCTTGGT	64	2.46154
GTCAAACAGAACGAATAGTG	64	2.46154
AAGTCTGGTCGAAACATCTG	64	2.46154
CTGTGGTTTTTGTTTCCAAA	64	2.46154
CAGAGTCTCAGTGTTGAGAA	64	2.46154
CAAACTTCCTGGCACAGAAT	64	2.46154
AAAAAGGAAGAATTCGTGGG	64	2.46154
CAAGACCATATTTGAACAAT	64	2.46154
GCTCGTCCACATACCTCCTT	64	2.46154
GCAGCGGCCGAGGCAACAGA	64	2.46154
GTATGTTCACACGTTCCCTT	64	2.46154
AGATACATGGTTAGAGAGTA	64	2.46154
CCTCTGGAAAATACTTCCTC	64	2.46154
TGAATTGCCTTGACTTTTTC	64	2.46154
ATCCTTGCTAACTTCTCCAA	64	2.46154
GGGTGATTTTGGTTGTTCAG	64	2.46154
TATATTTTCGAATGAGCAGC	64	2.46154
AGGTCAATAGGTGATCTGTT	64	2.46154
AGAAGATTTTTGGTTCCTAA	64	2.46154
AACCTGGTTGCTAGGCAGTT	64	2.46154
GAGGTGGAGAAAGGGAAACC	64	2.46154
TATGAAGGGATCCCTCTTCT	64	2.46154
CTTAAGCGTCAACAATCATC	64	2.46154
TGTAACAGAATTGGGATTTG	64	2.46154
TTGCTGAAGATGACTTGCTG	64	2.46154
TTCAGCTGGCGACTTCACTA	64	2.46154
GACACCTCATAGTGTAAAGT	64	2.46154
CCTAACGCCCCAGACTTGAG	64	2.46154
TACAAGGAAAGAAAAAGGAC	64	2.46154
CAAGATTTTGGTTCCTAAAT	64	2.46154
CAGGCCAAAGGTTGGGTCAT	64	2.46154
TCGTGTGTATTGGAGCAAGG	64	2.46154
TATCCACCAGATGTGGAGCC	64	2.46154
GGCGCAATGCTCCATGAACA	64	2.46154
CCGCGCACTTTCGCTCAGCG	64	2.46154
AGGTGTGGACATTGGTTTGG	64	2.46154
GGAAAAATGGTTTGATGAGT	64	2.46154
GGAAATAGCACACAAATTAG	64	2.46154
GTTCAAGCATGCATCAAAAG	64	2.46154
ACCCAAAACTGCTTCTCTGA	64	2.46154
AACTTGGTTGTGACTGGTTT	64	2.46154
AGTTCCTGGTGATACGCGTA	64	2.46154
CAAACACAACCACAAATAAT	64	2.46154
GCTGGACGAACTAAGGAAAC	64	2.46154
AAACAAATCCAAGAGTTACA	64	2.46154
CCATCCAAGTTTGACAAGAT	64	2.46154
CTAGACTCTCTCCTGCTTGA	64	2.46154
CAATTGGATCAAGCCAACAG	64	2.46154
GCTGTTCTTTTCATTTCTTT	64	2.46154
TGTATCTGAAAACTCTGTAG	64	2.46154
TTGATGATTGGGAACTGTTT	64	2.46154
GCTTCGGTCTTTATCTCAAA	64	2.46154
ACATACAGAGGTACCTTGAA	64	2.46154
TGCGAATACTCCTCTAATGT	64	2.46154
GAGAATCCTCTTGTGTTCAA	64	2.46154
TTTGGCTTGTGTTTCCTTCT	64	2.46154
CTCGAGTATGGGGCGTTAGG	64	2.46154
CCTAACGCCCCATACTCGAG	64	2.46154
ACCATAATTCCTCTCCGTAT	64	2.46154
GTACAGTGTTAACCGATTAA	64	2.46154
CACTTTGACTTCAACTTGCC	64	2.46154
CAAACGAAAGGCATTATGCT	64	2.46154
TGTGTAGCTTTTGGATGTGA	64	2.46154
GGGGTATAAAAGCATCTGCT	64	2.46154
TCGTCGTTGTATGTTGTGTT	64	2.46154
TGGATTATAGAGACTTGAAT	64	2.46154
GGATTATAGAGACTTGAATA	64	2.46154
GCAAAAAACCCCCCCTGGCT	64	2.46154
AAATCCTATATACCCGGATT	64	2.46154
AATCCTATATACCCGGATTT	64	2.46154
AGTTATGCATGTTTGCTTCT	64	2.46154
CAGTTGTGTTTATCTTCCCA	64	2.46154
GCAGGTCTGAGCACATACCT	64	2.46154
TTCTGGTCCTTAATCTCGTT	64	2.46154
GTCCAGAGGTTGATGCGAGC	64	2.46154
AACATGTTGGAACCTTAGTA	64	2.46154
GAAACTAGGAACACCACCTT	64	2.46154
AGGTTGTGGCTTATGCTTCC	64	2.46154
TTCAATCACTTCTTTCAAGG	64	2.46154
AAGACTTTCCTTTTCCAATA	64	2.46154
TATAGGTCACTTGGTATTTT	64	2.46154
TATTGACAGTGGAGTTTAAA	64	2.46154
TTCGGGACGATCTTCTCTGC	64	2.46154
TCCTTTCAGACTGTACCTCT	64	2.46154
TCCAAGAGGTACAGTCTGAA	64	2.46154
AAGGGTTTCACCTATAAGAC	64	2.46154
AATTGTTGAAACCATCGAAT	64	2.46154
GTGGGATTTTTCCCATTCGA	64	2.46154
CCAATTACCCCTCAACAAAA	64	2.46154
TTGCTGGTTTACTGGTTTAC	64	2.46154
TCATTGGGAGTTTCAGATGG	64	2.46154
TAAAAAGGGTGGCTATTCGA	64	2.46154
CTAAAAAGGGTGGCTATTCG	64	2.46154
AATCCTTATTTCATGGCATT	64	2.46154
CTGGCTGGGATCTGCGCGCA	64	2.46154
GGAAGCAGTCTTGCCAGTAG	64	2.46154
GAGCAAATTCTCATATTTTC	64	2.46154
CTTCTTGATTCTCCATTCTG	64	2.46154
ACTTATTGAACCAACTTCTG	64	2.46154
TTTCAACGCTCGACCAACAC	64	2.46154
TTGGGGTAGTTGTGCTCAAA	64	2.46154
CATTAAAACAGCTGAATGGA	64	2.46154
CTGAGCGAGAAGGTGAAATT	64	2.46154
TTTCAAGTCTTTGACTTAGC	64	2.46154
CTATGGTGGCTTTGAGGTAA	64	2.46154
GTTATCCTTCACCCATCCTG	64	2.46154
TTAGGCAAAAAAGGGCATCC	64	2.46154
AGAGTTAGTAGAATCTCCAA	64	2.46154
CAGTAAGCACTGTATCTAAC	64	2.46154
GATGCTTCATGGTTAAGCAA	64	2.46154
GACTCACCGCTACAGTACAA	64	2.46154
CTCTGACAGCTTCTTCTAAA	64	2.46154
GTACCCCCTTCGTGCAGTGA	64	2.46154
TATTGACGACAGTCTGAATC	64	2.46154
AAGGGTGATTTTGAGTTTTA	64	2.46154
TTGGCTGACAGTTATGATGA	64	2.46154
TCATTCATGCATAACAGGTT	64	2.46154
TTGAGGTAATTTGTAGCTGT	64	2.46154
TTTAAATCTTTTGTGTCGGG	64	2.46154
CTTTGTAGAACCTGTTTTAC	64	2.46154
GGGCCAAATGCCATGAAATA	64	2.46154
CGGTTCTTTTTGGAAAGAAA	64	2.46154
ACAAAAGAAGATCAGGTTTG	64	2.46154
AAACAAAAGAAGATCAGGTT	64	2.46154
CCCTCAGGAATAAGCCTACT	64	2.46154
GCTTCGAAAGAAAGACCTCT	64	2.46154
GCTGCTAGGCTAGGGACTCA	64	2.46154
CCATTGCTTACTCTTGGATT	64	2.46154
CCAAATCCAAGAGTAAGCAA	64	2.46154
GGCAATAGGAATGCATCATA	64	2.46154
TAGTGAGAATAGGAGCACTT	64	2.46154
CCATGATGCGTGGATGATGA	64	2.46154
GTGGTGTTGTTGTGCATGCC	64	2.46154
GAATGCATTATGCTTTGTTT	64	2.46154
TCCCCAGTAGTGTCGCTCGT	64	2.46154
GTCTGGCATCTATTTGTCAT	64	2.46154
ACTTTTTCATGTTCACACCT	64	2.46154
GAAATCACATTCAGGAACGT	64	2.46154
TGGAATTACACATGCCAGGC	64	2.46154
GACACAACAACTGGATTTCT	64	2.46154
TGGAACAAGGTTTAGGGCTG	64	2.46154
TCAATAGTTAGAGCTTGAAA	64	2.46154
TGTCACCTTCAATCATGAGT	64	2.46154
TCGACGTCTTTACTCTAGTC	64	2.46154
GGTTCAGAAACAGATTAATG	64	2.46154
CGACTTAAGTAAATACTTAC	64	2.46154
AGAAACAGCTTTACAACCAA	64	2.46154
ACATTTTTCACAACAAACCT	64	2.46154
AACCTTCTTTCGGGGTACCT	64	2.46154
TCGAGGTTTATTGATGAAAG	64	2.46154
ACCCCCCATTAGGATTTCGA	64	2.46154
AAAGAACAGTTGACTCTGAG	64	2.46154
CTTTCGGGTTTTTGATCCAC	64	2.46154
AGGGGAATAAAAGCATCTGT	64	2.46154
CAGCAGATTTCTCCCCAAGC	64	2.46154
GCGCCGTTTAAAGCTTTGTA	64	2.46154
TGGGCCTGTCTTGCCTGCGT	64	2.46154
CTCGCTATAATCCTAATGCC	64	2.46154
AAAGCATCCAAGCTCTGGTG	64	2.46154
CTTTCCATCTAGAACTTTCA	64	2.46154
TTCATCCTCATCATCTTCAG	64	2.46154
GAAGTATTCGCGACTCTCTG	64	2.46154
GTCTTAGAATGATGTATGTG	64	2.46154
GCCATCATCAGTCTTCAGGA	64	2.46154
CCAAACTGAAAATTGTTTGA	64	2.46154
CCCTCAAACAATTTTCAGTT	64	2.46154
TAACTTGTCTTTAGCCTCCA	64	2.46154
AGATAATGTTGTAGGATAGC	64	2.46154
TAGTTGTAGAATTTTTGAGG	64	2.46154
CTTTTCAAAAGAGGAGCCGA	64	2.46154
CCAAAAAGCTGACCGAAAGT	64	2.46154
ATGTTATCTGCAACTTGCGC	64	2.46154
CTCAAACTTTCACACCCTTC	64	2.46154
AAGGGGAGGTATGACCCTGA	64	2.46154
ACCCAAAGTTGGATGAACTA	64	2.46154
CCGGAATGGTTATGAAGAAC	64	2.46154
GACTACGGTCCTTAGCTTCA	64	2.46154
GAAAGTAGATACTGAACCTT	64	2.46154
GGAACGAAACCAAAACCATT	64	2.46154
GTAGCAGAATAGCAGAATTG	64	2.46154
GTGGTCTAGATTATTCCATT	64	2.46154
TTCCTTAACAGCTTGAAGAT	64	2.46154
TAGGCCATATATGGAAGGTT	64	2.46154
TGGTCTGAAAAATGGCTAAA	64	2.46154
CGAGGAAGACCCTACCATGA	64	2.46154
AACCTCAATTGATCTCGGTC	64	2.46154
AAGGAGACGAATTGTGGTGC	64	2.46154
CCATATGCGTTAACCGGTTA	64	2.46154
CAAACACCTTGTTCCCCTCG	64	2.46154
TAGGGCACACATGAGATAGG	64	2.46154
GGTTAACCGGTTAACCACAT	64	2.46154
TGACTGTCCTGTGTTGTGTC	64	2.46154
TCCCGATCCATTGCTGTTGA	64	2.46154
AACTCAAAGTTGCGGGTAGA	64	2.46154
TTGAATTTGCTCTAACTACA	64	2.46154
TTCTGGTCAGTTTACAAAAC	64	2.46154
CCGCTTAGCAGACCAGGCTA	64	2.46154
CAACAATCGTCAGCAGTATC	64	2.46154
TGCTTATTTTTCATGACAGG	64	2.46154
ATACATAATCAATGGTCTTC	64	2.46154
CAACGACTACATCATGGTCA	64	2.46154
GAAAACAGTATCATACGGGA	64	2.46154
ACTGCTTTCACAACAAACCT	64	2.46154
ACACTCGACTACCATTCCCC	64	2.46154
GCGCTGCAAACAGGCCTGTG	64	2.46154
ACGCGTATCATACGCATATG	64	2.46154
ACCACGTTCATTACCCCATG	64	2.46154
ATGGCTACCGAACCTCGATG	64	2.46154
GGGCAATTCCAACGTCCTCT	64	2.46154
TGCCAAACTCTCCTGGGGAG	64	2.46154
AGGAGGAACTGTTGGAGTCA	64	2.46154
GGAGTCATGGTTTGAAGCAT	64	2.46154
ATACTTCAGGTTGATGCGAT	64	2.46154
AAATGATATGGAAGAGAAAC	64	2.46154
CCCGAAAACTCGACCGCTGC	64	2.46154
GGGCATAGGCAGTCATTTTC	64	2.46154
GGGAACTGAACTTGAGCCGG	64	2.46154
AGATGATTGCTTCTTCTCTG	64	2.46154
AGATTTCTACGCTACCTATC	64	2.46154
GAATACACTGTGATGTCGTT	64	2.46154
CCGTGGTTTGACTTGAAGGT	64	2.46154
AGGCCCAGGGAAATTTGCGA	64	2.46154
ACTGATGATTTCCATTGTTG	64	2.46154
GTTCGGTTTAAAGAATGCTG	64	2.46154
TTTGTGATGGCTTCTTGTAT	64	2.46154
GACATTGTGTTCAAGAGGTT	64	2.46154
CAACAGGACTTGTCCCCAGT	64	2.46154
GGACTGACGTGCGATACCCG	64	2.46154
GCTTGTATATAGCTAGGTGA	64	2.46154
AGGCCTTTTGATAGGTTTTA	64	2.46154
CAAACTACACGCCAACCACT	64	2.46154
AAGACTTGAATTGGGTAAGA	64	2.46154
AATGGGACCCCATCTAGGTT	64	2.46154
TACCACACTGGAAGATGATC	64	2.46154
TTCTTCCTGTTCTTACCCTT	64	2.46154
ACAACTTCTTGGTCAACATT	64	2.46154
CGGGGAGACTTGCGGTCTGA	64	2.46154
ATCAAGATGTAAATTCCACT	64	2.46154
TCCTTCGATACCAAGGCAAT	64	2.46154
ATTTTTAGAACCCGTTTGGC	64	2.46154
GTAACCCTAGAACTGACCTT	64	2.46154
TTGTTATGGAATCTACCCTC	64	2.46154
GAGTTTTTGAGGTATTTATG	64	2.46154
CAGAAAAAATGCAAATGGTT	64	2.46154
TTTGCCTGGACCGCTCTTTC	64	2.46154
AAACTGATGGTCAGACTGAG	64	2.46154
CTTGATCTTCTCTGACATAT	64	2.46154
CGATATGTCAGAGAAGATCA	64	2.46154
TCATCAACAGGTGAACGCAG	64	2.46154
GATGGTCCGACAGATTGATG	64	2.46154
CCTTTGTGCAAAGATATGGA	64	2.46154
TCTACCATTGCCTACAATAT	64	2.46154
AGTTGGTGGCAATGTAACTT	64	2.46154
ATGTGTGGAAGTTGGTTTCA	64	2.46154
GGTTTGAGGCATCACATGAT	64	2.46154
GCTGACGAGCGACACTACTA	64	2.46154
CCATGATAGTTGCTGCGTAG	64	2.46154
CTATCAGTTGTTGCCAACCT	64	2.46154
ACGATTATATGACACTGCAT	64	2.46154
AAACCCCTCACTCCTCAGCA	64	2.46154
CTGGATGGAATAAAGGCTGT	64	2.46154
CGCATGTCAGAGCTTATTAT	64	2.46154
GAGGTGTGACGAACGGGATG	64	2.46154
ATTTTGGTTTGATGTGGAGA	64	2.46154
CTTGATTCTATCCTGGATTT	64	2.46154
TAAAAAAGGTTCCGAAAACT	64	2.46154
TAACTTGTCTTTAGCCTCTA	64	2.46154
GGGCGAGGTTGCCATGTTTA	64	2.46154
AGGGGGGGAGTCATCAATGA	64	2.46154
AATTAAAGCACTGCCAGAGA	64	2.46154
TTTCAGGGGCTTCTCTTGAA	64	2.46154
AGTCTCAAGTTAACTCGGTA	64	2.46154
TAATATTTTCCGCTTGCGTC	64	2.46154
ATCTGACTCCTCTAGGGAAA	64	2.46154
ACCATGCCCTAAAGAGTTGG	64	2.46154
CCGGTTAACACGCTGTAAAC	64	2.46154
TCTTGTCTTCGTCTGAACCA	64	2.46154
CGTCTGGGGGTTACCAAGCC	64	2.46154
GAGTGATTTTTGAGGTCATT	64	2.46154
ATGCCACTCAATAATTCACT	64	2.46154
TCTGGACTCGACGAACTTCG	64	2.46154
TCGGGCACCCTGCAGGTTGG	64	2.46154
ATGTGGTTATAGGCTCAGTT	64	2.46154
ATTCGTGGGACCCTTGAGTA	64	2.46154
TGTCGTATTGTTGATTTTAC	64	2.46154
AGGATTTTGGAGAAACTGTC	64	2.46154
AAGGTATTTTGCTGCTTAAG	64	2.46154
GCTATGCTAAGCCAAAGGGA	64	2.46154
AACTACGGTCCTCGGTTTCA	64	2.46154
TCAGCGAAGGAGGGAATTTT	64	2.46154
ACCATAAAATCCAGACCAGA	64	2.46154
ATTTCAGGACGTGTTTCCGG	64	2.46154
AAAAGAAAGAGGGTACCATG	64	2.46154
ATGTATGGATGGACTGTTTA	64	2.46154
CATGGAATTTCCTGTCGAAG	64	2.46154
AAATCAGAGAGCAAATTTTG	64	2.46154
GGACAATACTGCTCACGCCA	64	2.46154
CTTCTAGCTCTCTTAATCTT	64	2.46154
CGAGGTTATGAAAGTAATGG	64	2.46154
CTTCGGCACCATAGTTCCAA	64	2.46154
TGGTATTGACCTTACTAATA	64	2.46154
ATTTTTGAAGATGGCTCTTG	64	2.46154
CTTTGCAATCCTCGGTTCCA	64	2.46154
GAATTAGGGTTCTAGAGGTT	64	2.46154
AAGATGAATTAGGGTTCTAG	64	2.46154
TCTTTCTTCTTTGTCGCAAC	64	2.46154
AAATCCCTCAAAGAGTTTAT	64	2.46154
GCTTTGTCGAATTGAAGAAA	64	2.46154
CACAATGTCGGTATCCAACC	64	2.46154
TGAACACTCTCTTCATAGTC	64	2.46154
TGCAACCTCTAACCTTTGAT	64	2.46154
AATGGACGTCCCTACTCTGC	64	2.46154
AACGCTACACACCAACCACT	64	2.46154
GCCATATACGAGTGAAAATG	64	2.46154
TAAAATATCCTATAGGGTGA	64	2.46154
GTTCTTGGGCTGAAAATGAA	64	2.46154
AGTTCTTGGGCTGAAAATGA	64	2.46154
CCATTTCCATTGCAATTCAA	64	2.46154
GGAATGGGCTTTAGGCTGTT	64	2.46154
TACTGGTTTACCCGGTTTAC	64	2.46154
ATCATCTTCGACACGGGGGT	64	2.46154
TCATACTTCTAGGCTCAAAG	64	2.46154
ACTTTGACTTTTGATTTCCA	64	2.46154
CCTTCGGAACTCATGCTAAT	64	2.46154
CAATCCTCGTTGGATCAAGG	64	2.46154
CTCCTTGATCCAACGAGGAT	64	2.46154
AAGTTAAAATGCCTTGAGGA	64	2.46154
ATGGATCGGAGTCCCATCAC	64	2.46154
AGGGCTATGAAAAGCGCTGG	64	2.46154
GGAGCCTTTAGGTTTCGAAA	64	2.46154
GCCAACTGATTCTCGTCTCT	64	2.46154
TTTATCTGCATCTGCCATTC	64	2.46154
GAGAGTAACCGTAACTTGCG	64	2.46154
CGCAAAAATCGCGCCGCGAC	64	2.46154
AGCACTCGGCGTTTGGACCG	64	2.46154
CTACACTGGTAAAAGAATTC	64	2.46154
CATACAGGTTGTCCGTGTCC	64	2.46154
AAATGAGCAGGCATGCCCCA	64	2.46154
GGACCAAGTGCCATGAAATA	64	2.46154
CGGATGCCTTGGAACTCACT	64	2.46154
ATCCCCATTTTAGCCTATTT	64	2.46154
TGATGGTTTGATGTAAGGGA	64	2.46154
AGGAGTATGAGGTATGATGA	64	2.46154
ACGCAAACTGCATGCAAAAA	64	2.46154
CTGTAGAGGTAAGCGCCCGA	64	2.46154
ACTGATGACCAGGAAAAGTG	64	2.46154
AATTGAATATGAGGCAAAGG	64	2.46154
CACAGCTCACGCCCCCACCT	64	2.46154
TCATTCCTTGTGAATTGATT	64	2.46154
GTTTATCTGACCTAGAGAAG	64	2.46154
CAAGGCCCAAATTCTTGAAG	64	2.46154
ATTATACCTCTGCATGTCAT	64	2.46154
GATTATACCTCTGCATGTCA	64	2.46154
AGAACGGGGTGTTACAATAG	64	2.46154
AGGTTTCACAAGGTTCTCTT	64	2.46154
GATTCAGGTATTTTCTGATT	64	2.46154
GGTGAAGTTATGAGTATAGT	64	2.46154
TCGTCACGAGGCTACTTTTG	64	2.46154
TCAGGCCATGTTTGGAGTTT	64	2.46154
CGATGAATTAAGCGCTAAGA	64	2.46154
CATTTCTGTAGAAGTCAAGA	64	2.46154
ATGTGGTATTGGGTATGAAC	64	2.46154
CTCCCAACTTAAATTATGCC	64	2.46154
CCCTGTTGAAGTACGTACAG	64	2.46154
CCTCTGTACGTACTTCAACA	64	2.46154
AGTTAAAATATCCAACAGGT	64	2.46154
AGTTTGTTTGTTGATCAAGT	64	2.46154
ACCCCGTCCGTCACAATGTT	64	2.46154
GTATGTGTTTATGCTTATGC	64	2.46154
CAATCTTAAGCAAAACACAA	64	2.46154
AAGGAACGTCCATTAGGTCA	64	2.46154
ACCCTTCTTTGGATAATACC	64	2.46154
TGTTGTATCTGTGGGAATTC	64	2.46154
TGATGATGGTTATGGTAAAC	64	2.46154
TGTTGTTTCTCCGAATCCGA	64	2.46154
TGCTTCATGGTGAAGCAAAT	64	2.46154
GTCTAGGTAACAGCCCCACA	64	2.46154
AGGATAGGGAATTTTTAGCA	64	2.46154
CTGAGTTGCCTTTCAGGTTC	64	2.46154
GTTTCCTACTGTTTGGTTTA	64	2.46154
GTGTTTTCATCTTTTGAGTT	64	2.46154
AGAGGAAGATCAAGAACTTT	64	2.46154
AGGAATCAGAAGTTTGGGAT	64	2.46154
GAAAATTCCACCTCACGCTC	64	2.46154
[truncated: 58,001 more rows]

## Sheet: Guide Pool 6
gRNA target sequence	number of targets	Relative frequency
CGGCAAATCTGGGGATGAAC	52	2
GGTGTAGGTTGATCTGTGAC	52	2
CGTGGATATTGGGTAGACAT	52	2
ATGTTCCTCGTGTTTAATTG	52	2
ATTTTGGACGAGATTAAAGA	52	2
GAAGTTGATTGATGAGGTGA	52	2
GAAGTTCTGTGGTCTCCCGC	52	2
TTTCGAAGGGGAGGTACCCT	52	2
TTTTTGAAGATACTTCTCTG	52	2
AGACCAACATAACACAGTAT	52	2
TTCCCTCGGGATGTGACTGA	52	2
CGCTGGGGAAGAATTATCCA	52	2
GTATCAGCTGAACGATTTGC	52	2
AATCTAGGTCGAAGTCGAAA	52	2
TCTCAGTTTATCGCTTCAAA	52	2
GCATCTGTTTGAGACTGTTT	52	2
ATGATTGAATCTACCTCAAA	52	2
AGTAGCTTGAGTATCCATCC	52	2
CTAGAAAAGAAGATATCTGA	52	2
TTGATGATTGAGTGAGGTTA	52	2
CCAATAGCTTTCTTGATCTC	52	2
AAGTGTGAAAATGTGAGGAT	52	2
TTGTGAGATCCTATGGGCTA	52	2
TGGAGATTGGTTTGGTGACA	52	2
CAATCCCAATCTCCCGTCCT	52	2
AATCCCAATCTCCCGTCCTT	52	2
TCTGTATATGACATTGGTAT	52	2
CAACTTCACCAAGGTCGACT	52	2
CACAAATGACCTATGAAACT	52	2
GATTAGAGCAGGGTATAACT	52	2
AATCCCATGGCCGATTACGC	52	2
AATGGAACACCATTATAGTT	52	2
GAACGTAAAATGAGGGTTTT	52	2
GTTGATTGATTTCCTTTTCC	52	2
TACATAACACTGGGGTCGTT	52	2
GGTGGGGTGCTGATGCAGAA	52	2
CCAACTCTAAGTCATGCGTC	52	2
GCCTTTATATAGTGAGCTTG	52	2
GTAGTAACATGTTCATGTTT	52	2
TTGATCCAAACATCAAGAAA	52	2
GCTGTTTGGCATTGGCTTCT	52	2
TGATTGGAGGTAACACAACA	52	2
TTGATCATAGTTTTGGGTTT	52	2
TTAATGCTAGGCATTCACTC	52	2
GCCCGTCACATGTGATTTTT	52	2
TCGGTTGCTGATATTACACA	52	2
TCTTGATCCAGCCTAATGTA	52	2
GAGTCGGCCAAATTTGCAAG	52	2
TTAGGGAGAGATGATATCCA	52	2
AATCATGTCTCTCCGAGCAG	52	2
TCCGAGCAGAGGATATCAAT	52	2
TTCACAAGTGAGCAACCTCG	52	2
TACTCCATGAAAAGTTTGGA	52	2
TCGGTTCCCATCACTAGTAA	52	2
GAATTGGTTGGAAGGCTGTT	52	2
ATAAAATAGGGCGCAGCTGG	52	2
TGTGTCTTGTGTTGTATTGG	52	2
GCCGGTTTTATTCCTACAAG	52	2
GGGCTTGGGAGGTGGACGAC	52	2
AAGATTTCCCTTTTTCCTCG	52	2
TAGATAGCAACATGGAGTGT	52	2
TGTCGCTTCTTGTTAAATTG	52	2
TTTGAAGTGAAAAGCCAAAG	52	2
ATGGGAGAACCTGTTTACCA	52	2
GTGAAGCTGAAGTATCAAGG	52	2
CGTGGATCTCTTCCATCAAT	52	2
TGTACTCCATAAAAAACTCC	52	2
AGAGCTGTGTGGCACCCTTT	52	2
CTCAGCTGACTCAATGCATG	52	2
GGGAACCACAGTGCTCTGCG	52	2
AGATATGAGGATGATAATTC	52	2
GTATGTTCTTTTGGGTTTCT	52	2
ATTAAACCACCTAGGGTTTT	52	2
GCTCCAGACAGCACAAGCTC	52	2
AAAAGAGTGAGATCTTCTTT	52	2
TTTGCCCTGGACCGCCCTTT	52	2
ACAATATTTTGCTGCTTAGG	52	2
GTTATGCAAAGGGAAGGTAT	52	2
TGGATGGAACATAGGCTATT	52	2
GAAGCAAAAGTCCAAGAACT	52	2
GCTGTTGGACAGTCTGAGCT	52	2
TGGAATTAGTGAGATTTCGG	52	2
GCACTTCTCTCCACTGATTT	52	2
AATTTGATCGATGAACGTTA	52	2
AGGAACAAAACCAACGTCGT	52	2
AAACTCACATTTCAGCAACA	52	2
GTAGGGTGCCAAGTATGTTT	52	2
TCATATGTGGATAGAGGGTT	52	2
AACAGGATCATTACTGATAA	52	2
GGTGGAATGGAAAATGGTGT	52	2
TGGATGCGAAACAACGGGAT	52	2
CTTGGCCATAGTGTGCCCAC	52	2
CTGGAGATAATTTGCAGCTG	52	2
ATGTTACCCTTCGCTTTGCA	52	2
CATCCCCGAGTGTTTCGAGA	52	2
CCTTTCTGGAGAACCTTTTC	52	2
CCAGAAAAGGTTCTCCAGAA	52	2
TCTATCACAGCTTAAGAAGT	52	2
AAAGTCTTATGCCAGTTTTT	52	2
GGTCCACCACCTCCTGACTC	52	2
CACTTCCATGTTTTCATCAC	52	2
GGAAAATGTGAGACCAGCTA	52	2
AAATTGGAGGTATGCTACAA	52	2
GAGGAGAATGTGAGGAATCA	52	2
AGGAGAATGTGAGGAATCAT	52	2
ATTTTTGAAGGGGACCAGTT	52	2
TGATATGAAAAGGGCTGGAA	52	2
GTGTGCTTAGAAAGTTCTTA	52	2
AAGTCAGAGAAATTGTAGTT	52	2
TGTGGAGGAATCATTGTGGG	52	2
TATACCATAAACGGTTCCGA	52	2
CTTGAAACTGAAGGTGAGAT	52	2
CTTGGCTCATCAGCCTGTTG	52	2
CGGTGGAACCACATTCTGAA	52	2
CTACATTAGCCTTACCCGGA	52	2
TAGCCATCTTAATTTCTGTG	52	2
ACGACTTTCATTACCCCGTG	52	2
ACAAACCCAATACCACTTGG	52	2
TTGGTATGGGGCTGATATGC	52	2
ATGGTAAGGTTAGATCTTTA	52	2
CTTGTGCTGGGAATAATGAG	52	2
TTTCTGAGGAGGCTGAGAAT	52	2
TTGATACTCTGGCTCAAGAG	52	2
TGTTGATACTCTGGCTCAAG	52	2
CCCGCATATTGATGTTTTAG	52	2
AGTCTGTTGCGGTATTTACT	52	2
CAACATATAAGGAAGCTTTC	52	2
AACAGCTGTTCAGACAATTC	52	2
TGAGAATTTCGACCGGATAA	52	2
CCTTGCTACACAACTTCATC	52	2
TTCCTCTCACCCCAACCGAC	52	2
GACTCTCATAGCCTTTTCAA	52	2
AGTGATGCTTAGGTTGTGAT	52	2
AAAGGTGAATACATGAACTG	52	2
TTACTTGTAGCTCCCCGCAT	52	2
CGCCCATAATGAATCAACAG	52	2
TGTTGGTAATGCTGAAGTCC	52	2
AGAGCGCCAGTTTTCCACAC	52	2
TTGAACCTGGGCCCGAGCTT	52	2
TGTGTAGAGAAACATTCAGA	52	2
TTTCCGGGGATTCTCTTGAA	52	2
TGTGACGGGCGTGGCAAGGG	52	2
CAGAAGGGGTGTGACGGGCG	52	2
GCAGAAGGGGTGTGACGGGC	52	2
ACAGAAGCAACTCCTAAATG	52	2
GAATTCTATGGGGTGCGTGT	52	2
GAATGATAGAGTAGTGTGAA	52	2
TTTATGTTACCCCTGGTGAT	52	2
ACCTTCTTTAAGGGTTATGA	52	2
TTTTGGCTTGAAAAATGTTG	52	2
ATTTGAGGGAGGTTTGATGT	52	2
ATGCAAAGCAAAAGCCTACT	52	2
GACTGCAGTCTGTATAACAT	52	2
TTCACCAGAGATTAATCATT	52	2
TCATAACTTTATCACACTGT	52	2
GCAGCGGGAAGTCATCCTTC	52	2
AATCAAAAGAAGCGAGTACA	52	2
GAAAGACATACAAAGACTGA	52	2
CTCGGAGGGACATAATTCTT	52	2
AAGAATTATGTCCCTCCGAG	52	2
GAAGAGTTCTCACGTTGTGC	52	2
AGATCCTCTAGAAAACACTA	52	2
CCCCAACTGAGTTGTCAAGA	52	2
TGGATTCAGCCAAGTTTTGA	52	2
GGGGCCTGTCATGATTTCTA	52	2
ATGAAATTTGAGGGATTGAG	52	2
GAATAAGCTGCAGGCTGAGG	52	2
TCCATGTGAAGCATTTAATG	52	2
CAATGAGATTTTTGATACGG	52	2
ATCATGTGATGACTTTGCTG	52	2
CCTGTATTTGATATGTGTTG	52	2
CCTCAACACATATCAAATAC	52	2
TGCTTAATGATGGGAGAAAT	52	2
CCTGTGGTCAAAGACTGCAT	52	2
GGGAGCTGGTTGATATGGAA	52	2
TTGTGGAGGAATTATTTGTT	52	2
CATTTTGAGAAGCATCTTTG	52	2
AAGGCATTGGAACGTTTTGT	52	2
GGCTTTGTGAGACGAATGAC	52	2
CCCTCACACGGCTTACTATT	52	2
TAGAGCTTCTTACTTTTTTC	52	2
TGCGGTTGCTGTTGTTGTTG	52	2
ACTTGGTAATGTACTTTGTT	52	2
AAGGATCATGGTTCGTAATG	52	2
AAAGGATCATGGTTCGTAAT	52	2
CACTCATCCAAACATCAACA	52	2
ACACACTGGCACCAACCAAC	52	2
CTAGAGATATACCGGGTAAG	52	2
TAGAGATATACCGGGTAAGG	52	2
GATATACCGGGTAAGGGGGT	52	2
GGAAAGCAAGTTCAGGTAGA	52	2
CGAGTAAACCTGCGTCTAGG	52	2
AGCATTCGGAATTGTCATTG	52	2
ATCTCGCAAACCCGTAGCCT	52	2
CGCTGTGGTCGAACCCATAG	52	2
CAACTAGGTCAGAAAACACC	52	2
TGATGTTTTCAGCATCTGCA	52	2
TGCATGTTACCCATCAGAGA	52	2
ACATCAAGAATCAAGACTTA	52	2
TTGCCAGGACGATGGCTGTT	52	2
GTTGCCAGGACGATGGCTGT	52	2
CATGATGCATGATAAAGGCA	52	2
GATTATTGTGGTAGTTCATA	52	2
ATGACATATATGAGGAATGA	52	2
GAATGAATTTTGGGGAAGAA	52	2
TCGAGAAACGAGAATTCAAG	52	2
AAATGCTTCAAGTGTGGAAA	52	2
GCTTTCAAGACTCAGACATT	52	2
CAGAAAAGAATCTACAGAAA	52	2
GTCGTGGCGGGATTTTTCAC	52	2
GTAGTAACCTTAAGAGAGGA	52	2
AGACATTAGAAGACATGCCT	52	2
GGTGCAAGCGTTGCAACATC	52	2
GAACTTCGAGTAACACTCGC	52	2
AACTTCGAGTAACACTCGCT	52	2
TAGCAAGTTCCAGAATTACA	52	2
TTAGCAAGTTCCAGAATTAC	52	2
AGAAGAGTTATTTTGGAAGA	52	2
GTGCAGAGATGCCTAAGAGG	52	2
GGGACCACTGGCTGAACCAC	52	2
CCTTTTGGATTGAAAAATGT	52	2
AGCCACCGGCTGCGACTAAA	52	2
ATAACCGGGAACATGATATT	52	2
ATTGTGGTTGGAATGAGATT	52	2
TGAGTGTACTCTACTGGGGA	52	2
TTGTGCAAACATGGCGTTTA	52	2
GCCTAGAGGTCTGCAGTTGA	52	2
TATTGCTATTGCTGCTGCAT	52	2
ACTATCAAAAAGAAAAGGAG	52	2
ATGAGTCAGTTGGATTTCAA	52	2
TGTTTTCCACTGGTCGAACC	52	2
TCGCAAGGGAAGAATTGAGT	52	2
TGATAAGTAGATGCCGGTAA	52	2
GGTTACCCTGCTTCAATTCT	52	2
TTCATCAGGGTTTGTGTTTT	52	2
TTTAAGGCATGTTTGTTCAG	52	2
ATCTGAGACTGGTCATCTGA	52	2
AAGGAATGATGTCTGGGATC	52	2
TCGATCGGAGCTGAGTCGAT	52	2
TTTGAAGTTGGGGCCTTTGA	52	2
TGGCTCAACAACAGCAGCCA	52	2
GCAAGTAGAAATGTGTCTTT	52	2
CTGTCTGAAACGATACTCGA	52	2
TTCCTTCACTGATCAACTTC	52	2
CTCTGGGAACAAATTCTGCG	52	2
GTACCGTCTTGAGAGCTTTT	52	2
AACGGTTGCAACAACTCTGC	52	2
AATCTCGATCGAGACGAACA	52	2
CATTAAGGCCGACATATGCA	52	2
GGTGGGACAACACTCGTCAG	52	2
CAGCCTCTCCTGCTAACATG	52	2
ACTAAAACATACGACACCTG	52	2
ACCCCTCTTTACGATGTAAC	52	2
GACCAAGGGTCAGTTTTTGT	52	2
ACACAGTAGGATAGGGAAAT	52	2
CAGTAAAAGGCCAAAATGGA	52	2
TCCTCAAGCTGGGGAAAGCC	52	2
AAGGATTATGGTCCATAACG	52	2
AAAGGATTATGGTCCATAAC	52	2
AACCCTAAATGTGATTCCAA	52	2
TGAAGGTAGAAGAGATCCGT	52	2
GAGAACATTGGCGATCTGCG	52	2
GACAAGCTTAAAACATGTGG	52	2
GTTTGGAAAATGGCGAGTAA	52	2
GCGCACTATTTTGGATTAGA	52	2
ACAGGAGGTACCAATATTGG	52	2
CTAACAGGAGGTACCAATAT	52	2
ACGATAAGAACGCTTGATTT	52	2
ACCTCTTCGCATCCTACAAC	52	2
ACGTAGTTCTCCCTAGAAGA	52	2
TGAAGAGAACACTGCTGAAT	52	2
AGAATCATCTTTCTCAAGTT	52	2
AGGAGCTACTAAGATGTACC	52	2
GATCTTCAACGCTCAAAATA	52	2
GGAGAGTGTAAAAGTGAAAT	52	2
AGCAGTGATACAATGCAGCA	52	2
GCTTTTACAATCAGATCACT	52	2
CTTTTCGTGCCAATCTCTGT	52	2
CTTCCTTCTTATCAACACAA	52	2
CAGCTTAAGTAAATACTTAC	52	2
TCCATCGGTATCACGTGAGA	52	2
ACAACCAATCAACATACAAT	52	2
TATTCCGGGAGAGGTTCCTG	52	2
TGGCTAGCCCATACGCGTAC	52	2
TTGTGAGAGATGTGACAGTT	52	2
TGATTGGTGGATGGAGTAAG	52	2
ATCAAACAGTAGTTTAAGCA	52	2
TCATTAATGATCGTTCTCAG	52	2
TCAAAATGGAGCCTAATTGG	52	2
TAAACGAAATGGGGGCAGCA	52	2
GATAGTTGCCGCGTAGCGAT	52	2
ATCTTTTAGTATCGATTCCG	52	2
CACACTCTGCTGAGGAGTGA	52	2
GAGCCATACCAATGCTCGAA	52	2
TCAAGTCAACTCAGTAAGGA	52	2
TTGTTCTTGAATGCATGATC	52	2
CAACAAAATTTGCCCACACA	52	2
GCACTAATGTTTCTCCAGCA	52	2
TGTTGGGTGCTTAACTCATT	52	2
TGGGAGTAAGGTGTCAATTT	52	2
AGGATTTAAAGAAGTTGTTC	52	2
ATCACTAAACACTTCAAACC	52	2
GGCCAACTACAAAAAGAGAA	52	2
AGTGAGTTGAAAACCTGAAA	52	2
ATGCCATAAAACAAGAGAAA	52	2
TGCCATAAAACAAGAGAAAA	52	2
ACGAGAGAGAGAGAGACCTG	52	2
TTTGCCTAGACCACCCTTTC	52	2
ACAACAAAAGGGGGTGTTCC	52	2
ATGCAGTCCCAACTTCTTGA	52	2
GAACGAACATCCAATTATCT	52	2
TCTTAGCTTCACGGGCTCTC	52	2
TGTCAACTAAGAAAAGTTTG	52	2
GAACTTTCTGAGGTCTCCGT	52	2
CCGAGTCCACCCTTCCACCT	52	2
CAGTTCTTCAGAGCCAAAGC	52	2
TCTTTCCTGAAGTTGAAGAA	52	2
GGGGCTTGTTCCAGGTATAA	52	2
TGGGGCTTGTTCCAGGTATA	52	2
GTAGGTAATCGTCCTAGATA	52	2
AATCTCATCAGGAAACACCT	52	2
AGTCGACTCATGGAATGTTG	52	2
TAGCACACATAACTTCCTCT	52	2
GTTAGCTTCTATAAGGTATA	52	2
CAGGATGGATGCGAAGCAAC	52	2
GCAGATTCATCGTTCCTTGG	52	2
GATAACAGATTCTGGTACTA	52	2
GAAAATGGATTTTTTGATGG	52	2
TGGTGAAGAAGTTAGAGTTA	52	2
GTTAGAGTTATGGAAAGTTA	52	2
TTGGAAAAAGAGAAAGTGTT	52	2
TGAGTTCCTTGAGTTAAAGC	52	2
CGCCGGGAAATCTCTCTCTA	52	2
GAAATCACGTTCAGAAAAGT	52	2
AAAATTTGAGATGAGCATGA	52	2
AGTAAGACCCCACTCAGATT	52	2
CAGGAGTTCCAAATCTGAGT	52	2
CATAGGTTCCTAATGCCCCT	52	2
TTGACGTTGCCAGATAATTT	52	2
TGACTGGTGGAGCGAACACA	52	2
CATGTTTGGTAGGTTAAATG	52	2
TTTTTCCAGGATAGCTTAGC	52	2
GTCTGTCAAGTTTTTAAGCA	52	2
GTTTGTTGAGCATGATGTGA	52	2
AGTGTTTAGTGGCATCTCAG	52	2
GTGACAGTTAGGGTTTGGGG	52	2
CTTGTAGTAGAATAGCAGCA	52	2
TTTGGGGTAAAATTCGAATA	52	2
GCTTTTATAGCCAACTTCAA	52	2
CAGGCGAAAATGGGGACGCT	52	2
TTCCTAAAGAAGCCTATTGG	52	2
ACTAACCATTTCAAGGATTT	52	2
GGGGCCGCTAAGAAACCGTT	52	2
AACAAACATGTCACGTACTA	52	2
AGAAAGGGAACCAAGTCCCA	52	2
GTGTTTTGGATGAGATTTAA	52	2
GATTTAGAGTAAGTTTGGTA	52	2
GATCATATCTTGAGTTCTGT	52	2
GCATCTGCTCGCTCAGCGAA	52	2
CCATACAGGCCGAAGATGAA	52	2
GGGGACTGTTGAGAATTAGG	52	2
ACCATCAAATCACGAGGTAA	52	2
GTTTTATCAGATGGAGTCAT	52	2
GACCAATTCTTAGCACACCA	52	2
ATATGTCATATGGGATGTGT	52	2
ACCAGACTTTGGGTCCGAAG	52	2
TTGTTCTGGAATTAATCTCT	52	2
GCAGTGAAGAAACCTTTTGG	52	2
AAACATCTTCTTAGCTCCTT	52	2
AGGTTCATACGTGAGGTTTT	52	2
TTCTTGAGGGATGTTATAGA	52	2
ATGCTTCTGAAACCGCCCAT	52	2
TTCCGGAATTGATGGCTCTA	52	2
AGGATCTTGTAGAAATTGGC	52	2
AGGGTGTCCCGACTCTACAA	52	2
GTGTATGGCCATTTGGTGAA	52	2
AAAAATCCGAAAATCAAACC	52	2
GAAATGGAAACAAGACTGGC	52	2
TCATTGCTGTTTGATTTAGT	52	2
TCGCCTTCTCTAAATATGCG	52	2
GAAGAAGGAGTAGCAGCTAT	52	2
AAACTTGTTGCACCTTAGCC	52	2
GAGAAGGACGCATCCAGATA	52	2
TGTCCTTTTGCGACATGGCA	52	2
GAGCAGAGTAATCAGAGCCT	52	2
ATTTCTATCACCCTCACTCA	52	2
TGAGGTTTGATGATCCTAAT	52	2
ATGGTGAGTTTTATGAGGTA	52	2
CTGCCTACACACAGCTTCAC	52	2
TGATCAGAGACTTGATGATG	52	2
CATTTTCTTCACCACGTGTT	52	2
CTGGTCCGTATTAAATGGTA	52	2
TTTCTCATCCTCAGACATAT	52	2
AGCCTTTGATTCTTTTCTTT	52	2
CTTTGCTCTGATACTGAAAC	52	2
TGGACAGTGAAATTGTATGG	52	2
GGAAAAAATCACAAGGCGTG	52	2
AGCTTTCCAACGCCGCAAAA	52	2
CTATGAAAGATATCACTGAA	52	2
AAAAAGCAATGTGACTCCAA	52	2
AATTCTGGATACATGCTTCC	52	2
ATATTCAACAGAACCTGACT	52	2
AATTTGCATTCCAGATAATG	52	2
AGATGGATGACGTGCAAGTA	52	2
AGGTTTATTTCAGTTGTTGA	52	2
CGTATGGAGGGACACTCCCA	52	2
ACACCCTTCAAATTAGTTTA	52	2
AGCTTCGCATTGACTATAAC	52	2
GGGAAACTAACCTTCGAAGT	52	2
AGTAACATCCCCAGCTTTGC	52	2
CCTTCTTCAATTTATACACA	52	2
CCTTAATTTTGAAAAACTCC	52	2
AGGCCAGATTGGTAGCACAA	52	2
TATCACCCTCGTGGTAATGT	52	2
CTCTGGTGGTACGCGTACAG	52	2
AACATGGGGGTCAGAACATG	52	2
TCGTCTCTTCCACCTCGGGC	52	2
CACAGTGAGGATCAAGAAAC	52	2
GAAGTTTCTGACCCATTCTG	52	2
TCCACCAGCATGGGTCCCAA	52	2
TGGCGGCAGTGCATTTTGAT	52	2
AGATCTACCAAAACGGCTAG	52	2
TGTTGTTTGAGATGATATGT	52	2
TAAGTATGGACATACTGTAT	52	2
AATGCTGTTTTGGTTGGGTT	52	2
GGTGAGTGCGAGGGGTGTGT	52	2
ACCAGAATACACTCCACAAG	52	2
TTCTGTGGAAGCTTAACTGG	52	2
GATCCTGAACATAGAGGACA	52	2
ACGACTCTTTGGGGAAGCAA	52	2
AATCTCCAAGCGCCTTCTGG	52	2
TCTGACTCCGTTGGGGAGAA	52	2
GGGAAGAAGAAGATTTTTCA	52	2
AGTGCAAACTCTACTAGGGA	52	2
GATGGATGATGTTCATGTTC	52	2
AGATGGATGATGTTCATGTT	52	2
ATTTACGGGTGACAGTCATC	52	2
AGTGGTCTTCCATGTAATTT	52	2
TTTTGGACTAGGGGATCTTG	52	2
TTATAGGTGAATTCCACTAA	52	2
CGGCGCGAAGATAGTGTTCG	52	2
CTCTTTCTAACAATGGAGGC	52	2
GTGCGTTGTTTTGTTATTTA	52	2
ATAATGGTCGACAAGAACTG	52	2
TTTGCCAAATGTCGACCAAG	52	2
ATATGTGACTTCTAGTGACA	52	2
AGAATTTTCTAAGCTGCTTG	52	2
GAACTTCATCAACTTCACGA	52	2
CATTTATCTCACTTTGTGCG	52	2
AGCAAGCAAAGAGATAAAGG	52	2
AGATAGTTATGAAGGGATAC	52	2
CTGTACGTGTTGCATCTGAA	52	2
ATTGTCGTCAATAGCATTGG	52	2
ATTGGAAATCTGGGGTTTTC	52	2
TTTTTGACTGATTTATGCTC	52	2
GTAGTTATCACCTCTCCCGC	52	2
GTTGTGAAAACCGGAGTAGG	52	2
ATCAAGGAGCATGTAATCAT	52	2
ATGGCGAAAAGACGGGATCG	52	2
CTGTCGAAACGCCTATACCA	52	2
CATTCGACACAACTCGTCCT	52	2
CTCAGATCACCCAACCACTT	52	2
AAAGTGGTTGGGTGATCTGA	52	2
GTTATTAACAAACTGAAAGG	52	2
AAAGGAATATGGAATCCTAT	52	2
CGAGTCCGTTTAGGTCGTGT	52	2
ATTTGTTGTGTTTGCCTTTG	52	2
ACCTTCGTGGTGTGCCTTTG	52	2
ACCAGCATCTTAAACAAGAT	52	2
CAAAGGGCGCGTTGTCCCAG	52	2
AACCAGAATAGGCTGTGGAT	52	2
AATGGCGCCAGGGCATCGAA	52	2
ATCATCGAATCACAAGGTAA	52	2
TCCGCTTTTCGAGAAACAAA	52	2
TTTTTTCAACTCAACCAACT	52	2
TGAAGTTGGTTTCAGAACAA	52	2
TGTATGATCAAGGTTTTCTG	52	2
GATCAACTTCACCTTTTTCC	52	2
CAGTTGGAGACGATTAATCT	52	2
GCATTAATGGTGTGAATTCA	52	2
TTGAAATGGAGGTCTAATGA	52	2
CAAGATAGGGGTTGCCTTGG	52	2
TCCCCTCAGACCGTATTCCC	52	2
ACTTGCAGGACACCCTGCCC	52	2
TATAGGTCACCTTCAAAATT	52	2
GATGAGTAATTTCCCCTGAT	52	2
TGTAGATTCCAAATCACAAG	52	2
ATCTTCTTGCAACGTCTGCT	52	2
CCATACGCATATTGATACGC	52	2
TGAGAGTTGAAGCAGTTGCG	52	2
GCAGAGAGATACAGTATGTT	52	2
ATTGACTCAGTTGACTAAGA	52	2
CTTCTTTGTCGTCTAGTGGA	52	2
CCGGAATGAATCGAAGCTTA	52	2
TGTTTCATGTGTCTCAATTG	52	2
GGGGAGAATCTCATTCTCAG	52	2
GTCATTTGAAGGTTATGTGA	52	2
AAGATCTTGGCGAGAACATC	52	2
TTCAGATGGTTGGAAGGTGT	52	2
GAATGAAGCGTGTGTCTCAG	52	2
TGAAGAAATAGGCTTTTGTA	52	2
CCATACACCCTTCCAGATCG	52	2
GTTCGATCAGGCAAGTTGCT	52	2
GAAGGTTGTTCAGGTGAAGG	52	2
GTACCCACAAAGTGCAATGG	52	2
TTGAGTTGCAAAACGGGTTG	52	2
AATATACTCAGCCTCTACAG	52	2
TTCTATTTTGAAGCCAGAAG	52	2
CTCTAGCTCTGATCCACTGT	52	2
GGATAAGGCATTGATTGGTA	52	2
GTGTTTTGGAATGGTTGGTG	52	2
ATGCTAGACCTTTCATTAGT	52	2
AAAAAGGGGCGTGACGGACG	52	2
CGGAGCTTCTTGTCCTCAGT	52	2
TAATGCACCAGGTGTATTCA	52	2
TAGTTCTACAGTGTCTAGAA	52	2
CTCCACCAACTCATGGATGA	52	2
GGCCAGAAAACATGTCTTTA	52	2
TTTAGGGTTTTAGGGTTTTT	52	2
GATCTTAAGTCTCCCATGGA	52	2
ATTGAATTGCTTCATAACCT	52	2
CGGTACGAAGCATGTGTCTA	52	2
AAAAATGAATGGTGCAGTGG	52	2
TGTTTTTGGCTCCATTTGAC	52	2
CGAGGGGGCCCCTACTCTGC	52	2
AGCAAAAGCTCAGAAGAACT	52	2
GGAGGCTGTGTTGCCAATCG	52	2
TTCAAACAATCTGTGTTCTT	52	2
CAAATGAGGAGGCACAATGA	52	2
GGCTAATAAGATGAGATGTC	52	2
CAATCATGATGATGACTTCG	52	2
TCGCTTTTTGAAAAGTTTTC	52	2
CCAGGAGGACATACCACTAC	52	2
TAATGCGCCGGGAGTATTCA	52	2
GAGGACGAAAACCCTTTTAG	52	2
GACGAAAACCCTTTTAGTGG	52	2
TTGATGAGAGGTTTAGAGGC	52	2
TTTTGATTTTTGTAGCCTCA	52	2
ATGCCGGAGCAACTTATCAA	52	2
AGAGCTTTATCAACTTCACG	52	2
ACAAACAGTTCCGACGGATT	52	2
GTATTCCTCAATGGGTTGGT	52	2
AACTAGCCCTTGTACTGTAG	52	2
ACTAATGGATCAAGATTCGA	52	2
TATTACAGAGTGATGCCCTT	52	2
GCTAGGTGGGATCTTATGAG	52	2
GGAACTGTAACAGAAGTCAC	52	2
AGTGTTTAAAGGACTCATGT	52	2
AGTTACCAACTCATGGATGG	52	2
CTTTAAGGGTGAAATGAAGA	52	2
AGGGAGTTGCAAATATTTCA	52	2
AATATGTGGATGTGTTTGCC	52	2
GCCCATGACGGATGCAACGT	52	2
AGAACTTGGAAGTGAAACCT	52	2
ACGCGACAGGTACAGTTCGC	52	2
ACATCAACAACTAAGTCATA	52	2
AAAGAATAGGGCAAGAAAAT	52	2
GTACTGTAGCTGAAAAATGA	52	2
CTGTTACGCGCTGAAAATCA	52	2
GAAATTGGTAATTACCCTTT	52	2
ATGGATATGGAGGTTATATT	52	2
CCCATTTGCCTGTGCATAAT	52	2
ATTTTCCAAATCACCAGCCT	52	2
TTGAGGATTGGTATGGTAGA	52	2
CAGTCCCTCAAATGTTGCCT	52	2
GGCGTTGAGTTATGTGCTTA	52	2
TTGCTGAAGAATGATATGAT	52	2
TTGCGTTAGCATCATAGTTC	52	2
GGTATTGGCTCTGTACATCC	52	2
AGCACAATCCAAAGAAATAA	52	2
GTCAAAGTGAAATGTAAGCA	52	2
TTAGAGGTGTTAAGAAACTC	52	2
GAAGCGAAAATGGGGCCAGT	52	2
GAGCTCATATCAAAAAAATG	52	2
ATTTGGATGGGTGACCTTTT	52	2
CTTCTCCATGCAGGATGTCA	52	2
GAGATAGAGGAGTTCTGAAC	52	2
GGTTATTTTGAGATGGTGTG	52	2
CTGAGCAATGATGATGATGA	52	2
TGCATTCATGATGTGTCTTG	52	2
GCTTGATCTCCTGTGATCAG	52	2
CACAACAATTAATATGAGCA	52	2
GGAGGCAGCTTCTACCCACT	52	2
TGAACATCCTTACTCTGCAG	52	2
AGAATTTTCAAGACCAGCTG	52	2
AAGTAACCAAAGGACCATAC	52	2
TGCACGTTTTTGGATTAATC	52	2
AATAAACGCCCAATTTCTTG	52	2
GAGTTCTGAGGAAATTCTAT	52	2
CCTTCGAAACTCATGCCAAT	52	2
ACCTTCGAAACTCATGCCAA	52	2
CGCTCCTGTAGCAAGGTTAG	52	2
TATTGCCTCGGCGCTAGGCA	52	2
AAGGATGAATCAATTCATGG	52	2
CTGAAAGTTGATGAACTTAT	52	2
TTGGTCCCCAGTTCGAATCC	52	2
ATAAGAAACCCTAGCTGACC	52	2
ACTGACCTTGGATTAGTCCC	52	2
GACTGATCTGCTGGGGATAA	52	2
ATTAGGGGCTGTCATGATTT	52	2
GAATCACTTCATTATGCCCA	52	2
CTTGCTTTATCTTCGATGAA	52	2
GACTGTATTCTGTGTAATTT	52	2
GGAAGAGTCAGAATTGTGTA	52	2
CTTTAACCTTAAGCCATCTA	52	2
GGGCGAACTACGGAATATGT	52	2
GCCTAATTGAAGTTTTGTGA	52	2
TCCTTCACAAAACTTCAATT	52	2
AATGCTACAAAAGTTGTGAT	52	2
AAGTGGATTTGGGCTTAGAG	52	2
CGCACTGTCTGAAAATTTAT	52	2
AAGGCATATACTGGTAGGGG	52	2
AAGAAGAAGAACAGTGCAAT	52	2
CAGACGTGGTTATGAAGAAC	52	2
CCAAAAATAGTGGGATCAAA	52	2
AACACACGGGGAAAAGATCT	52	2
TATTTTTCCATCAAATCCAG	52	2
CTAAGTGATCACCTTGAACA	52	2
CATGACATGCCCCCAGTGTA	52	2
TTTTGGCCTATGGGGTTTTA	52	2
TCAGTGTGTTCTGGGCAACC	52	2
GCTGTGGAATCAGGCTATGA	52	2
GGTTATCAGAAGAAGAAAGA	52	2
TAGGAGTTCTGGTCCGGCCG	52	2
TCATTTGTGATGTGTTTGAA	52	2
TGGAAATGAGTTTAGGGTTT	52	2
GTGAAATCAATGATAGTGAA	52	2
TTGAGTATTAGGGTTCTATG	52	2
AACCACATTTGGATACTGAG	52	2
CCCAAGCGAGGTGTGACGAA	52	2
CCGTTCGTCACACCTCGCTT	52	2
GGAGATCATATTTCCAAGAA	52	2
TGGTATATGAAGTGGGCAGG	52	2
AACCTTGGGATGAAATGATA	52	2
ATAATGTTTCAGTTACTTGC	52	2
ACGCGGGAATAATCTCCAGC	52	2
TCACTGTTTTATCCCCAATA	52	2
TCAAAACTTTTGAGCCCCAA	52	2
AGGTGTGAGGATGGTTTTTG	52	2
GTCAACTAGGAAAAGGTTAA	52	2
ATTGAGGGCTGTTGGGATTA	52	2
GCAAGTTTTGTTCATGTCAA	52	2
AACTTGAAAGCAAATGACTT	52	2
TAACAACTTCTCTTAGACAA	52	2
GATTAGTGCTGGATACAACT	52	2
CAGTTTGTTGAAAGAGTATG	52	2
CAGCTTCTCATCGTCAGTGT	52	2
AAATAACTGAAACTTCCTCT	52	2
ATTACACTCCTGCTGCTAGA	52	2
ATTTGCTTGAGCAAGCATCT	52	2
ATAGGTTGCAGTAGAAGAAT	52	2
GGATGGTTTTTGAGGTCACT	52	2
TGGAGAGGGATAACTTTGTT	52	2
AACCAAATTCAATGCTCTTA	52	2
GTTTGAGGTGGAGAATTTGA	52	2
ACTTGGATGGATGAAAATCC	52	2
ATGAAGAACATCACGAAGTG	52	2
TGACGTCAGGTGAGAATACT	52	2
GAGAGTTTGAGGTTTGAAAC	52	2
TACGTAGTAACCTTAGAAAA	52	2
TGGGAATCCACTTGCCCCTA	52	2
AACGCACGGTACTTCCCATG	52	2
AAGCAAAAAGAGGACTGCTG	52	2
CTCATCCCATATGACCTGTT	52	2
CTTTGCATTTTCAAATGGAT	52	2
CTTGTTAAGAGCTTGTGTGT	52	2
AGAACAAGAAAGTTCTCTAC	52	2
TATGGCTCAATGTGTGTTAA	52	2
GGTGGATGGTACATGAACTG	52	2
AATAAGGCATTTTCAACTGA	52	2
AATCAACAACACGACACCAA	52	2
ACCCACTGTGGTGAATCTTC	52	2
AGGACATCACTTGACCTGTG	52	2
AGTATTACCTTGTGTGAAGA	52	2
GAATGTTCGGGATTCTGCTT	52	2
AGAATGTTCGGGATTCTGCT	52	2
GTTCATGGTCATTAAGTCCA	52	2
TTGCTTTAATTTTGGTGAAG	52	2
CATTCAATATGTTACTCAGA	52	2
ACCAACGCTCAACATAAACA	52	2
GAATTAGCTGTGTGAGTTTT	52	2
GCTGAAAATTCTTTCTGATG	52	2
TTTGCAAACATTTAGGGCAA	52	2
TTGGGCCTTGTCATATGCTT	52	2
GTGACAACTGACATTCTGTT	52	2
TGACAATGTTGTTGATGTGT	52	2
GTGACTCGCGGGGATTGATA	52	2
TCTGAAACGTTCCAACGTTT	52	2
GATCATCAATTTCAAAGATC	52	2
CTATGTTGATGTCGCTATGA	52	2
GGTGAGGATAAATAACTCCT	52	2
TAAAGTGCGATACAATGATA	52	2
AATGAGACTGGTATGCTGTT	52	2
GAGAAGATAACTGGACATTG	52	2
TTCAACGGCCAAGCAAATTT	52	2
CATGTTTTGAGTGAGGTTTT	52	2
CAATCAAACCTTGCCGAAGA	52	2
TACTAAAGTGACAGTTGTCG	52	2
AACAATGATCTCCTACCCAG	52	2
TGAAAAATGAAGGGGCAAAG	52	2
TGCGGGATAATCTTAGGGAC	52	2
CGCGACTTTATGAGTCTATC	52	2
CGTACCCCCTTCGTGCAATA	52	2
TAGCTCGCTCTTCTCCTTCA	52	2
TTGTCCATGAGAATATCCGA	52	2
GAGATTGGAAAATTCTTCTA	52	2
GAAACTCATGATGAGTGTAT	52	2
TTAGGCATCAGTCAAGCTAA	52	2
GGGTGTTTCTTCAGGGGTCT	52	2
CAAACACTTCACCAAGTCAA	52	2
CAAGCTGCTTCGAAAGGACC	52	2
AAAATGATTTGATGAGTTGG	52	2
CACTTTCATAGCAAATCTCT	52	2
GCACCATTTATGGCTAAAAA	52	2
GCATACAGGTGGTCCGGTTT	52	2
TGACGGTTAGAATGGAAGAG	52	2
GATTTCCAAAGGAGGTGTGT	52	2
TTGATGAAGATTCGAGGCTT	52	2
GAAACCCGAAAGGGCGACTT	52	2
CAGGTACTGGCTTGGTGGAT	52	2
TCAAAGGGATATCCAACATT	52	2
CAAAGGGATATCCAACATTA	52	2
GGATGAGGCTATGTGAGCTT	52	2
CCTGGCGAACCACTGAGGTT	52	2
ATTGTAGGGTATTTTGTGGA	52	2
TGAAATCCAGCCAGAATATG	52	2
TTTTCTCCATCAAAAATTGG	52	2
TGAAGTTACCCAATCACCAG	52	2
GGAAACATCACTTCGTGCAA	52	2
TACATACGCTGGCATGTGAG	52	2
CGTTACCTACTCATGATTGA	52	2
TTACATCTGCTGAAGGTTTA	52	2
AGTTTGAATTTCGTGTTTCC	52	2
TCTCCGTGCAATAAGGGATC	52	2
CTCCGTGCAATAAGGGATCA	52	2
AAGCAAGCATAATCACAAAA	52	2
TCTGTATTTCGTGCTATTTA	52	2
CGGATGACTGACTTATGCTT	52	2
CATAAAAATGGAACTAGAGT	52	2
CAGAAAGAGTTCTCCAGAAA	52	2
ATTTTGTCGATGGCAAATGA	52	2
GATGAGAAAACAGTGAATGA	52	2
GGACCAGATTCGAAAGCAAG	52	2
AATTGCCCGTTGAGTATATT	52	2
ACACCCAATCTCCATTAATC	52	2
AGGGTTGGATACAGAAATTG	52	2
ATCCGGCTGGAGGCAGGGCA	52	2
GATCTCGCTGAATTAAAACA	52	2
AGAAATCATTTGCAAAGTTG	52	2
AGGACAAACAATTTCAAGTT	52	2
GATCTTGGAATTTTTGGAAA	52	2
ATGCGACAACGCGGGGAAAG	52	2
GATCATCAGGTTAAGAGAAG	52	2
TTTTTGAGTGAGAAAGGAGA	52	2
TTGATGCAGTTGACTTGTAA	52	2
TCTCTCAGAGACTCTGGTAG	52	2
GAACCTCGCCCGAAAGATGG	52	2
TCCAACCACAACACCCTCAC	52	2
GTGAGTGAATCAGTAGCAGA	52	2
TAACAACTGAGAGTAGGTCA	52	2
TCCTTTTCCCCAGCGGAGTT	52	2
GTCAGGTGTCAAGCATCAGT	52	2
CCGCAGGGGTAAGCGTCCGA	52	2
AAAGGTATCCAACAGTTCGT	52	2
GAAGGTACTTCGACAACAGG	52	2
CATAACTTCACACTATCCTA	52	2
TACCTTCAGTAAAAGATGGT	52	2
TCGACCATGTTGACATCAGC	52	2
CATTTTAACAAAACCCCTTC	52	2
AGTTTCCAGAAGAAGAAGGA	52	2
AAACTCACAATCACTGAATT	52	2
GTGCGCAGTATTATTTTTCT	52	2
GATCAAGGGGTAAGGCATTA	52	2
ACAATTTCACCCCAACCGTC	52	2
TCCTACTTCAAGGCTTAAAG	52	2
ACCAAGACAGCCAGAGGTGT	52	2
TATAGAGGGTTTTTCTAAGT	52	2
ATCACCTTGGCCGGGTGGAT	52	2
AAGCTAGCTGAAATTTCTGC	52	2
TCTTTGATTTAGGGTTCTTT	52	2
CGCCCGTCACATGCTGCTTT	52	2
CACCTATGCGGATAGAGGAT	52	2
ATTCACGAGCAGATACATTC	52	2
AATTCACGAGCAGATACATT	52	2
ATTGGTGCAGTTCTATGATC	52	2
GTAGGCATTAGTTGGTAATC	52	2
CCAGCCTACAGCTGCTTGTT	52	2
CATCTGCATTCACAAAAAGT	52	2
ATTTGCCCAACATTTCTTAT	52	2
CATTTGCCCAACATTTCTTA	52	2
TGTTTTTAGTGGCATCTCAG	52	2
GATGATAATCGGGTACTCTG	52	2
TCTTTAGAGCGTTGCTTATC	52	2
AGTCAGAGAAATCATAGTTC	52	2
TGCAACGCATCTACGTTTGG	52	2
TTGGCCATATGAGGATGTTT	52	2
CAAATGGAAGGTGATGGAGA	52	2
GACTGACTGCCCTGAAGTGT	52	2
GTGGAAGCTTCTCCCTCACT	52	2
TTGATTCAGGTAGCTTTGTA	52	2
TGATCAGATGGACGCTGAAT	52	2
CTTTTTGTTTTAGTTACGGA	52	2
CAAACCTCTTCCACCATGAA	52	2
CTTGAGCTGCTATACTGCTG	52	2
CTGCGAACTTCAATTTTTGG	52	2
ATCCAGCAGTGCGTCAGTAA	52	2
ATCGAGCCGACAGCGTCAAA	52	2
AACTTTACAAGCCTTTCCAT	52	2
AAAGGTTGCATCAACTCGGC	52	2
AACGGTTGCAAAAACCCTGC	52	2
CCAGAATGTCTTCAAAAGCA	52	2
TCTTCTCATCAGATACTACC	52	2
CCCCAGACTTGAGAGGTAAA	52	2
CCCATTTACCTCTCAAGTCT	52	2
GAAGATATGAATATCAGCAT	52	2
ATTACAAGGTTTCGGGATGG	52	2
ATGCATTTTTGCTTTCGTCT	52	2
AAGAACCCCACCCTTACCTT	52	2
TTGGTCATTAAGGCAATTTG	52	2
GTCAGTCTCAAGATCAAAGG	52	2
ATTTTGAGAGGGTTTGTTCA	52	2
AATCCTATGCCACCCCACAC	52	2
GTTGTTGAAGAATAAGATTC	52	2
TACTTTTGAAGCCCAGTTCA	52	2
TTTCGAGGCAAAAACGCAAC	52	2
TGGATGAGTTGGAATGAATT	52	2
CTTTCTTCTTCTTCTTCAGA	52	2
AACATTCTGAATGACAGCAG	52	2
TTATGTGTCGAGGCAATTGA	52	2
CGATAAGATACATATCCCAC	52	2
CCCAGCAGGCAACAGTAAGC	52	2
AAGAGTAGGAATTGGATTCT	52	2
GTCACCCCGCTCGTGGCATG	52	2
GAGTTCACATATACACTACT	52	2
TGTTGAGAAGATTGTTCTGG	52	2
AGAGCTTCATCTACAGATGT	52	2
AACTCACAACAATACCCTAA	52	2
TGGTAGTTGATGCTTTAAGT	52	2
GTTGAGACCTTCTTGGTTTG	52	2
ATAGGTCTTTTGCATTTTGA	52	2
ATTTTCCGGATGGGCGTTGC	52	2
GTACTTCTGAATAAGTGCCA	52	2
TCTTAAATCCAGTAGTATTC	52	2
TTCTTTTTTATCATCTGCTG	52	2
AATATGGTGCAACTCAACTT	52	2
CAGTGCTTAATGGAGGTAAT	52	2
AAGGGAGACCGTGTTGTGGT	52	2
CTCGTAAAACCTAATCAGCG	52	2
GAAGAGATCAACATGGTTGG	52	2
GGCGTGTTGAATATCTGTGT	52	2
ATTGTTGTTGTTATGTTGCG	52	2
GGAAGTGAGAGAGTGAAATT	52	2
AATTTCTAGGTTAGGGATTA	52	2
ATTTCTAGGTTAGGGATTAA	52	2
GGTTAGCGAAAGAGGAATTG	52	2
GATGAAACAATGATTTAGGA	52	2
AAGGGAAAAGTTGGAATTAA	52	2
TAAGAGAAAGGGAAAGAACA	52	2
TCTCATTGCCTTGGCTGTGA	52	2
CTTTGAGGTTAAGGCCTGAT	52	2
AATTCAGTGTCATGCTTGTG	52	2
TAAGAGACTATGTTCAGAAG	52	2
CAAGAACAAGATTCAAATTG	52	2
TTGATGAATGTTCACGTGGT	52	2
ACTCATAGATGAAGGTAGAT	52	2
CGGGAAATATTATCCCGGAT	52	2
GATGGTGGAGAGGCTTCTAC	52	2
GATTTTCAAAGGAGCTATCA	52	2
ATGAACATATGTGCCTTCTG	52	2
TGGTTATATGAGGTCATACC	52	2
AATGGGGATTTTGAGGTTGG	52	2
GAAAAAGGAAAGGAAAAGAA	52	2
TTTGAAAAGTTCGTAATCGT	52	2
TCAGTTGAGGTTTCATTGCA	52	2
GCGTACTGAAGGGGATTAAC	52	2
AACTTGTTGCGCTTTGGTGT	52	2
AAACTTGTTGCGCTTTGGTG	52	2
GAAGTCTTCATGCTTAAGAA	52	2
GAGAAACTACCGAGAAGGTG	52	2
TTACCATGACAAGAGGAGAA	52	2
AAGAATTGGTGATTTGTCAT	52	2
AATCATAAGGAATTGGACCT	52	2
ATCATAAGGAATTGGACCTG	52	2
TCTATGATCAACTCATCACG	52	2
CTTCTATGATCAACTCATCA	52	2
TGGGGTGTGACGCCCGGGGC	52	2
TTTAGAGTGTGTTTGAGTAT	52	2
TTGAATGTTGTAACGTGGTT	52	2
ATATCCAAATGGCATGTTCT	52	2
TCGTCGTCTTCGCGACATAG	52	2
CCCGTTAAGTGTTATCGTTG	52	2
AGAGGAAATAAAGGTTCTGG	52	2
CCAGCATTTTTCAGGCCAAA	52	2
CATCAGAACCACCAGGTATG	52	2
TCCTCTCGAAGAGATAGACT	52	2
AAAGAGGACCCAAGAGAATA	52	2
AAGAGGACCCAAGAGAATAT	52	2
GAAATGTGATAGACCTATGC	52	2
CGCAGCTCCAATCTTAACTC	52	2
TAAATTTTCCTGCACGAAAA	52	2
ATGCTGAGCCATACGCGTAT	52	2
ATAACACTAAGGCTGTACCA	52	2
AAGAATGGTAGTGCGAGGAT	52	2
AGTTCCATCACTCTCCATTT	52	2
TAACCATGTCGAAGGGCCAT	52	2
CTTGATAATCCTCTTCACGG	52	2
GATGCTTCGCTGAGCGAAAG	52	2
AAGCCTTTACTCCAAATTGA	52	2
AGTTTTTGGGGTTAGATGAA	52	2
AGCAAATTACTCATCACTTA	52	2
GTTATCAAAGCCGTTATGGA	52	2
GAGGTGGAAACCATAAATCT	52	2
GTTTCCACCTCTTCTTGATG	52	2
CGAATAAATCATTTCAGTAC	52	2
CAATTCAGTACAGTGTTAAT	52	2
CCCAGTATGAGTCTTGTAAA	52	2
TTAAAGAGTATGCGCAGAAA	52	2
GTAAGTAAATGAGAGGTGTG	52	2
CCTTTAATTATCATCGTGCC	52	2
GTTATCAAGAAAGCCTTCTC	52	2
TCCAATGTTTTGGTTGATAC	52	2
GCCTCTGTTGGTACGCGTAT	52	2
GGTGGAAATTGTAACGAGAA	52	2
TCATAACCCTTCACAGTATT	52	2
TGAAGGGTTATGATTCGATA	52	2
CGACCATATAACGCCTCAAA	52	2
ATATGACGTAGTATAGGAAT	52	2
TTTTAATTTTGAAGTCCAGC	52	2
TATTCTCCAGAAAATAGAGG	52	2
TTTTTGATGACAGTTGAGAA	52	2
TTGAAAAAGAAGGAAATCGT	52	2
GTTGAAAAAGAAGGAAATCG	52	2
CATGTGGACATTGGTTGGGA	52	2
CAAAAGTGTTTGACTCCTGT	52	2
CTCATCCCATATGACCTATT	52	2
AAGGGCTTTAAAGGTTGTAT	52	2
GTCTGGGGGGCTACCAAGCC	52	2
AAGGTGTTTAGGAAGGTTTA	52	2
CTGCCCCAGGTTAAAGATAA	52	2
AATGACGCTGACAAAGCATG	52	2
TTGTCAGAGTTGTAAGGCAC	52	2
AGCTGTTAGAGCAGGTATCT	52	2
AAGAGTTTGAGAGAGAATTG	52	2
TGAAAAGCTCATGGAAACAA	52	2
CACACAGCGACGGTTTCAAC	52	2
ATAATCTGGCTCTGAGGTCA	52	2
GAGTGGAATGGTTTGGTTTT	52	2
ATAGACTCTCTTGGAAGAAA	52	2
GCAGTATTGGGATTCGTGGG	52	2
AGGTAAACCATCAGCGGCAC	52	2
TCTATGGTTCCTGGCTTCGC	52	2
GCAATATCTGAGGTTCACAA	52	2
GGATCATGCCCCAATGGTGG	52	2
CCAGAGTTCGAGAAATATAA	52	2
TTATGCCTGATTTTAGTGAT	52	2
CACATGGCACATGGTGTGTA	52	2
TGGTCATTATATGATGTATG	52	2
GTAGATGAGGTCGTGTTGGA	52	2
TTGCTGGTGAAAGTATGACA	52	2
ACCAGAGTCAGACTTTCCAG	52	2
TGGTAGGAAGTACCTCCGCA	52	2
TGGGGTTTTAAGGACATTTG	52	2
TCCTACGGATATGTGGGGCA	52	2
ATCGGATTCTCCTTTACATT	52	2
TTTGAGGGTGAACTTTGGTG	52	2
AGGTTGATTTAATTGAGCGT	52	2
CCTGATATTGCTTATGATGT	52	2
GGAACTGCTTCTGACGCAAA	52	2
CCTTTGCAAAGTTAGGGGCA	52	2
CGGTCGTCACATGCATGGAG	52	2
TAAGAATGTATGCTACGGGT	52	2
GATGGTGGAGAGGCAGGAAT	52	2
AAAGAGGCTCTTTAGTAGTT	52	2
TCCCGATGAGGAAGGAGGAG	52	2
AAGTAAACTTCAGATTTGGC	52	2
AACGCCAAATATACTTCTTA	52	2
GAAAGAATGACATTATCTGG	52	2
TAATGCACCGAGAGTATTTA	52	2
TATAGTGCTCCAGCTAGTAA	52	2
TGGGGAAGAAGAAGGAGTTT	52	2
AATTGACGAGCAACCTCCTC	52	2
GAAGCTTTTGGAATCAGGTT	52	2
ATATGTCTGAGAGGGAGTCT	52	2
GAGTCGTTCTACTTTGTTGT	52	2
GTCCTGCTGTTTATGTTGAA	52	2
CTATTTGGGTAATAGTGGAT	52	2
TCTTATATAAGGCCAAGATG	52	2
GAAGATGAGCTGTATACCCT	52	2
CTTTGAAAAGATTCCAAAAG	52	2
TGTCAGTGATAATTCTCTCA	52	2
GAGTAGGGCTTATATATGTG	52	2
CAGCCACACTTCAAACAGCC	52	2
TTATGAGCTTAGTCGCACTT	52	2
GAAAACACAAAACAATCCTC	52	2
GTTTTCCACAGATAGACCTC	52	2
ATCATGCATCATACGCATAC	52	2
TCAGCTGCAAACACATGCGC	52	2
AGTCCAAAGCAATAAATGAA	52	2
CAATGCTAGACAATTCTATG	52	2
GAAAATTCCACCTCGCGCTC	52	2
GGCAGATGGTTTGGGAATGA	52	2
GTGTATGAGGGCTAGGGCTA	52	2
TCATCATTGTTGTGTCCAGG	52	2
AGGATATGATGATGATCTAT	52	2
TAGGATATGATGATGATCTA	52	2
CAGTTGCATGAGCAGAGCGA	52	2
AGTCTCGCAAACTCCCGCAC	52	2
ATATTCGAAGCAACATCCGA	52	2
AAGAAGAGTTGGATAGTCTT	52	2
TCCTAACGTGCCCAACTTTG	52	2
TCTCGTAGTCCATCCGATCT	52	2
ATGGGCTAAGGGTGATTGGA	52	2
TACATTGGTCAGATGGAATT	52	2
AATGAAGTACATTGGTCAGA	52	2
ATCATACTTGCCTTTGAACA	52	2
CAGAATTTGTGTGGTATTGT	52	2
CGGTTGCCATTCTCTTGTTA	52	2
TAAAGGACAAGAGGATCTTA	52	2
TTGGCCTTGTAGGCCATGTT	52	2
CTACAACATTAGCCTTACCA	52	2
ATGAGAAAGCGTCAAAAGTC	52	2
GTCAGAAAACAAAGCTCGAC	52	2
CCGTTTGAAGTTGAGCAGCG	52	2
TGACCGGCGCAGCTTTACGT	52	2
CACTTGACCAAAACACTAAT	52	2
AACTCATAAATGGCCATGTG	52	2
GTCATTTGGGAGTTGTATGA	52	2
AGCTACAACACTCCTGACAC	52	2
AGCATATTGTTCAACAAGTT	52	2
AAAATTTTAGCAGAACTACG	52	2
GGTCCTTTTATAGGTGAGCT	52	2
CAATTCCGCCAACCTCTCTA	52	2
TGATTCTTGGCAATGAAATT	52	2
GTTGGGTGGTTTTTCAAAGG	52	2
ACAGTTGGGTGGTTTTTCAA	52	2
GGTTCCTAATTAGGGGAACC	52	2
ATGTTCTACTTCTGATGAGG	52	2
TCTCAGCCTGCTGTCTGCTA	52	2
TTTTCTGGATACACTCTGAG	52	2
ACACTCTGAGTGGGTACAAT	52	2
TAGGCTTAACATGACATATA	52	2
TCATTTCGCTACGCGTTAAC	52	2
AGTCTCGTTGGTCATGGTTC	52	2
CTTGGTCAAATAGGGATGTT	52	2
ATTGCCAATGCTGTCCACGT	52	2
GAAGGGCCAAGCGTTTATCT	52	2
GTAGGTATCTCCTAACAGCG	52	2
TCCCCTGCAGAGACTTCAAG	52	2
TACCTTTAGCCTTTACCTTG	52	2
GCGAAATTGAGTGCAGTGGG	52	2
CAACCTGCACCGGGAATGGT	52	2
GATGAATGGAGCAGTCGAAG	52	2
ACCCTACTTGTTGTCATGCT	52	2
CTACAAGAAGATTCTGTATC	52	2
CTAGAATGGAGGTTTACAAA	52	2
GCTAGAATGGAGGTTTACAA	52	2
TCCATCTGAACTACATGGGA	52	2
TCCGTCCCATGTAGTTCAGA	52	2
GTGGAAGCAGGTCATCCCGA	52	2
TACTTGAGCCTTCGTCCGCT	52	2
CTACCAACTCAGAAAACCTC	52	2
AGGAGACTTAGGAGAAATTG	52	2
AAGGAGACTTAGGAGAAATT	52	2
TTTTCTCCATCAAATATTGG	52	2
CGCAGCAGCCAGCATAGTAG	52	2
TTTGTCTCTTTTGAGTTTCT	52	2
AACGCATAAAAAGAGGTTTT	52	2
ATCAATGGTCTTCCAGACAC	52	2
TCCCTTCTATAGTCATTTGT	52	2
GGGCCTTCATCAGAGTCTGA	52	2
CACTTGTTAACAAAATTGGA	52	2
CAATAAGCTGATTCTTGATC	52	2
CTTTCTTCAACTCCTGGAAC	52	2
TGATAGAGGTTGCAGAGAAC	52	2
TTTTTAGGCTTTGACTTAGC	52	2
TTGATTGCATCCGCATTCAC	52	2
TAGGTGGTGTGAAGAGGTTT	52	2
GAAGTCAAAGAAATCAGAAT	52	2
TATGTCGGCGCTGATGGTTA	52	2
GCAAAGTCGCCAGCTGAACG	52	2
CGTTCAGCTGGCGACTTTGC	52	2
TCACTTAAACACAAGCAAAA	52	2
TCTGATGGGCAATGAAGATT	52	2
GTGAAAACTGCGTCCATCAA	52	2
ACATTTTGCTCAAGTGGTTT	52	2
AGACATGGGTGCAGGGCATA	52	2
AGTCACTTTCCCTCAACTTT	52	2
TGGGGATGAAAATATCTCTT	52	2
GCCATACACGAGAGAGAAAG	52	2
TGACAGCCATTGTGATTTGC	52	2
TTTGGCATTTGTGGCATGCA	52	2
ATCACAAGCTCAATCTCCGA	52	2
GATTTGTGGGATTTGGACTA	52	2
ATTTGTGGGATTTGGACTAG	52	2
AAATCCCTCAAGAGAAATAC	52	2
TTGAGACTGCCCATAAAAGC	52	2
ACTTCTTCTAAAGGATCTTG	52	2
AGTGAAATTTGATTGCCAAA	52	2
CTCCCTTTTATAGGCAAAAT	52	2
ATAAATGTGCTGACTCACTA	52	2
AGGTCAATATTGCACAAGGT	52	2
AGGAGAAGTTGTCAAAAACA	52	2
AGGTGTGGAAGTTGGTTTGA	52	2
TGGCAGTGGTTCTTCTTCAG	52	2
CTCTAACTGCTTCCTCTAGA	52	2
CAATTCTCAATTCCGTGTCC	52	2
TGAGAAAAGTACGATGTGCC	52	2
GCTTCGGAGCAAGGTAGCGT	52	2
GATGAAAGGAGACTTACAGT	52	2
ATGCCCTAGATAGGCTATCC	52	2
ATGTGAATTTCATTCTGGAG	52	2
GATGTGAATTTCATTCTGGA	52	2
AACACTGCATTAACTTTAGA	52	2
CTTCTCGGTGGTTGCAAAGG	52	2
GCGGACGATTCAGTCGCTTG	52	2
GAACGTAACTTTTGGCTATC	52	2
AAACCAGGAAGCCAACGAAT	52	2
GCTTCTTCCCAGGTCGAATC	52	2
CAATTGTCCTTTGATTAGCG	52	2
ACCCCACCCTTACCTGGTTT	52	2
CAGCATTAAGGAGTATCTTA	52	2
GCGAGAAAAGTCCTTGATTC	52	2
TGTCTGAGAAAACAAGGCGC	52	2
TCAACGTTTTCATTTGCTGC	52	2
GGCTTCTCTTCATGAAAAGG	52	2
CGCATGCCTCTGAATCATGT	52	2
ATAGACTTGTTCTTCTTCTG	52	2
CAAATGCTAAACAGAATATC	52	2
ATAAATGATGTGCAGATGGT	52	2
GCAGTTAAGAAGCCTTTTGG	52	2
CAAGTTATTACAGTGTTAAC	52	2
GACGAGGATGTGTAGTGACC	52	2
AGAGAAAATGAGGTTAGTAT	52	2
AGCCATCTTCCTTCTAGTGT	52	2
GCCCTAGAGGCCATTTCTTA	52	2
TTCTGGCATGACAACCTGTA	52	2
GCAGAATTGTGGGGAATGAG	52	2
TGGATGCTGACGTCACACAG	52	2
GACGTCACACAGAGGAAAGA	52	2
TGTGTATACAAGATTGCTTC	52	2
AGAGTTGAAGAAACAATTGG	52	2
AGTGGGAAGTTGAAGAGAGA	52	2
ATACACTCTGACATGCGTCT	52	2
CCTGTTTCATACCAATAAAT	52	2
AATTTCGTCAGATGTTCGTT	52	2
GAAGATTGTTCCTCAAGTTT	52	2
GAACTCCCAATCAACTGTAC	52	2
TGGTGTAGTGGATGGGGTTT	52	2
TTTTATAATGACTACTGCAG	52	2
TTATAAGCCTTTAGTTGTGT	52	2
CGAGCACGATAACAAAAAAT	52	2
GTGAATGAGAGGTCAATTTG	52	2
CATTCAATACACTACACAGA	52	2
GAATCTCTCTTTTAAGGTTA	52	2
GAGAAAGGAACCGGCTCGCG	52	2
ATGAGAAAGGAACCGGCTCG	52	2
TGTCACGGTTGGAGGTGAAG	52	2
AGAAAGGATGGATATCTTGG	52	2
CAGCTTGGAAGAATGGCAAA	52	2
TTTACAAAGGAAGTAGGTCA	52	2
TCACAACTTCCATTGGCTCT	52	2
TCGGTCTGACCATCTTTCTG	52	2
AGGTTCTCTTTTGGATTTTT	52	2
GCGGCAAAGACCTGTTTGGC	52	2
GTTATGGCCGGAAAACCTGA	52	2
TTGAAGATAGATTCCAAAAC	52	2
TCCCCGCAGACATTTGCTCT	52	2
ATTTGAATGTCTGATGGTGG	52	2
TTGAGCAGGCTTTAAGGCTT	52	2
GGGAGAGGGTATGTGACCAT	52	2
GGAGAGGGTATGTGACCATT	52	2
TTCGACACTCTTGCATGTGA	52	2
GGAGTTTGGGGTTGAATTGA	52	2
AAAAATAAGATCTCGCCATT	52	2
GCTGATACAGTACCCTTTTC	52	2
GTAGCCGTGTCCTAGTGTTA	52	2
TAGGTGTAGGATTCATGGAC	52	2
GTAGGATTCATGGACTGGTG	52	2
AAATCTTCTGAAGTCTCCGC	52	2
GTTCCAAAGAGGCCTAAAGG	52	2
TCTTGATCAAGGTTTGCTTC	52	2
TATGGTTATTGGAACGTTAT	52	2
TTGTAACAGAAATTGGGAGG	52	2
TTTTGTAACAGAAATTGGGA	52	2
TTTTTGTAACAGAAATTGGG	52	2
CCATTTTTTCCATGAGAAGT	52	2
CCTACTTCTCATGGAAAAAA	52	2
GAGCCATTCTGAAAATTGTT	52	2
CAGAAAGAAGAAGGTCTTGA	52	2
GTTGTTCGAAGAAAGGTTAA	52	2
AATCCCCTCAGTCGCTAGAC	52	2
TTGCGATTTGATCCAAATTA	52	2
GAGGAACAGAGGCGTCTGCT	52	2
GGTAAAAAGAGTAACCCTCT	52	2
GTAAAAAGAGTAACCCTCTT	52	2
TCAGCCATATAAGGAGCCAT	52	2
ATCATACCTTCAGTAAAAGT	52	2
TGGTCAAAATATGAAGCATG	52	2
CGGTAATGGTATCCATCATT	52	2
GGTTTCTGGAACTATGGAAA	52	2
TCAATCCACTGTCTGTTCTG	52	2
TTCATGACGCATTTTAACGA	52	2
CGCATTACCAACAACCACTG	52	2
ATGTGCAAGGCGTCCCAGAA	52	2
TAAGAGCTTATACCTAACCG	52	2
TTGGAAGGCTGATGATGATT	52	2
GAGGGCAAAAGGCCAAGTGG	52	2
ATGGCTGGTATTGAAATTTT	52	2
TGATGTTTAAAGAGGCCTAA	52	2
GATTGGTTGAAAAAGTGAGT	52	2
CCAGGTGTTCCAAAATTGAG	52	2
TTTATTTTGAGAGTTTGGTC	52	2
CTGCCTGCTTAACACATCAA	52	2
GAATATGATGGCAGATGAAT	52	2
AGATTGTTTCGCTAAAAGTT	52	2
AAGATTGTTTCGCTAAAAGT	52	2
TTGAGGCATTGTATGGTCGA	52	2
CTGGTGCTCCTTCTCCTCTA	52	2
CATAAGCACTTACAAACCCT	52	2
GGTAGGTTATTCAAGGGTTG	52	2
ACAGGGGTCATGTGTTATGG	52	2
GGGTCAATTGGCTTGAGGAA	52	2
TTGTCTGAATCATAAGGAAT	52	2
AGACTCATGAATATCCTCTT	52	2
TCACATTGATATGAGCAATT	52	2
ACTAAGAAGGCAGAAGAAAA	52	2
GGCACGCGAGCTCGGACCGC	52	2
CTCTAAAAAGAGCTTGTGAC	52	2
ATTTTTCTTCCCCCTGTTGA	52	2
GAAAGGTTGAAAGCTGTGGA	52	2
CGTTCCTTTCCCGTGTTACA	52	2
TGACGCACCAGGTAGACACC	52	2
AGTGGATTATGTATCTAAGT	52	2
ATGACTTTTCAAGATACACC	52	2
GATGTTGTTTGCAAGTGGAG	52	2
AGGAGATTAAGAGGATCATT	52	2
AGGGACTGAGATATCAGCCA	52	2
TCGTGTACCTCCGGCAGTGG	52	2
GTTGGGACCCATATTTTTGA	52	2
TGATATTGGACTTTTTGGAA	52	2
GAGCTACATAGAGTGAATCC	52	2
AAAGCCATCTAGGATAGCAG	52	2
TTATGCTCTCATGGCCAGAA	52	2
CCTTAACTTGTTTGGATTGA	52	2
AGTTACTTGGGCTGTGTTTC	52	2
GTTGGTAGTAGGCTAATGCG	52	2
CGAAATTTTAACCTGGGGAA	52	2
CACCTGCCTCATGAATCCAC	52	2
TTAATCGTAGGCTACAATGA	52	2
GACGTCACCAACACTCCTCC	52	2
GAGTGGTATGGTAGAAATTA	52	2
CGGTTGTGTCGAAGAGGTTT	52	2
AATTCATCATTAGGGATTTC	52	2
GGATTTTTGGCAAGTTTTCG	52	2
ATCCTCCAAACTGCCACAGC	52	2
GGTCTTGAAAGGTCTCAAAA	52	2
CTTGTGCTTTGCAAAATCTG	52	2
CTCATTTTTCTTTCGAATCG	52	2
AGAAGAGTTTGCAATAATTG	52	2
AATGCTAATCATCACTATCG	52	2
GTATAAGCCCATTAGGTGTG	52	2
AGATCAACCAAAGTAGCAAG	52	2
GGAAAGAACTCTCTTTACTC	52	2
GTCAAAGAGTTACGCAATTA	52	2
GGATATTATTGACCAAGGGA	52	2
CTCACTAGTTCCAACTCACC	52	2
CCTGGACATATCATGTCGAA	52	2
GAGCTGTTGGAGGCTTGGTT	52	2
CATATGAGCTGTTGGAGGCT	52	2
TAATTCCAAACTTCCATACC	52	2
TGGTATGGAAGTTTGGAATT	52	2
GGCGAAAGATTCATTCCAAG	52	2
CGAATTGCAGATAACATCCG	52	2
GGGTTTTGATGTTGATCTGT	52	2
GGATGTCTGAACTCCTGCTA	52	2
TTCCTGGTTGGTCAGAGTTT	52	2
CTAGAAGTAGAGTAGCAACA	52	2
CGCTGATGTCTGATATGTTA	52	2
TGGGCTAGTCATACGCGTAT	52	2
TTATCCTACTGTTTGGACAA	52	2
ATTGTTTTCAAGGTCTTCTA	52	2
AACAGAGAGTTGTTAGTGCA	52	2
TCTTTCTCAGTTTTCGGCTC	52	2
GGCTGCTGTCCATACGCGTA	52	2
CCAATTGTCCAAATCCCCAG	52	2
GGACAACATTTCTTACCCCC	52	2
CATCTAGTATTGTGTCTGAC	52	2
CAAAGTTGTCTGAAGCAGAG	52	2
CAGATTTTTCACCCGTTAAC	52	2
GTATGTTGTGGATAATCAAG	52	2
AACGCATAAAGAGTTTTCTA	52	2
TTTCGCTGAGCGAAAGTGCG	52	2
GAAAAACTTACAGTAGCTCC	52	2
TTAGGCTCAAGGGGTTGACA	52	2
ATAGCTCCAAGGGATGACCT	52	2
CAAAATTGAGGAGTTGCAAG	52	2
GCAAAGGAATACCGTCCTTT	52	2
GATTTTGCAAAGGGTTGGAG	52	2
AGAGAAAACCCATTCTGCCA	52	2
TCCATCAGAATGTTGAACCG	52	2
CCCCTGCCTTAAGGGTATGG	52	2
GGGGCTTTGATTGATCAGAA	52	2
AGATCTGGGTGCAGATGATC	52	2
CTTCATCTCAAAAGAAGGAT	52	2
TAGAGATGGCTAAGGTTAAA	52	2
GGGCAAACAACCAATCTCTG	52	2
GATGACATTATCGAGAGATT	52	2
GCAGTAGAAGCTGAGGGTGA	52	2
GATTGGAATGTGTTCTAATG	52	2
CTTTCAGAATTCATTCAATC	52	2
ACCCTATAACAAAACCCTAA	52	2
TCACATGGAGGCCTAAAGGG	52	2
TTCTAATGATGATTTGAAGG	52	2
AGTCGTTAGAGGTGAATGTC	52	2
AGTACATTGGGTCCATTTCT	52	2
ACGTGGTCACCTGTTGTGAC	52	2
TCTCGATCCTTAATCCTCAT	52	2
GGTTGTTTCCATATTCTCTA	52	2
GTGCCTCTGAAAGCCATGAA	52	2
TCTCCATTAAAAACTTAGCT	52	2
CCTCGACGGAAGGAGGCTTC	52	2
CCAGAAGCCTCCTTCCGTCG	52	2
AGTGAGCTTTGGCACCTCCT	52	2
TGAGGATACTGAGTTTGAAC	52	2
TCAAGCAAGTCAGAGCACAT	52	2
TCCATTCCAGAGTTCCCCAG	52	2
CTTATATCTCCTGTGTTTGG	52	2
AGGTTTTTGTTGCATTTTCA	52	2
ACCTAAAGAAATCGATTGCA	52	2
TTTTGTTTCTCAAATACTGG	52	2
CGTCCTATATAAGGCCAAGG	52	2
CTAACTCAATCCCTTTGCCT	52	2
CACACTTTGATGATGATTCA	52	2
GCCCCTTCTTGTACATTTCG	52	2
AAATCATCATTAGGGGTGTT	52	2
TTGAGGTGTTTGTGTCGGTT	52	2
GATCAGCAATTGGACCATCG	52	2
CATTTTGAGCATGTTTGGGC	52	2
TATGTCGGCATCTGAATTGA	52	2
GCTCGACCAACACCCGTTAC	52	2
GTCAAAAGTGATGAAAATGA	52	2
GCGAAACATTTCCCCGAGGA	52	2
ATTGAATCGCATGCTAGGTA	52	2
TATGAAGAAAAATGAGGAAC	52	2
GTTCTGCGCTGGTTATCTGA	52	2
AGGAGGCACTTTAGCGCCTG	52	2
ATAGGTGATGTACCAAGTGT	52	2
ATCCAATAGTCGGTTGTACC	52	2
ATTTTGTATTGCTCTGATAC	52	2
TTAAGGGCTGTTGGGAATTT	52	2
AGTTAAGGAGACAAAGGCTC	52	2
TTTCGACAAGATGAGACTTG	52	2
TCCAAGTGTTAATGCGAAGA	52	2
GCATACTGTCATGGAACTGC	52	2
TGGACGAGGCCAAGAGTAAC	52	2
TATACAGGTGTTGTATGAAT	52	2
AACATATAAGGAAGCTTTCT	52	2
TTTAAAGGGGTATGAGATTA	52	2
ATTGAAATTTGACAGGGTCA	52	2
TTTGGCCATAGGTGAAGTTT	52	2
GGATTACTTAAAGGAGGTAA	52	2
AGTGAGCAACAATGCCCCTC	52	2
TGATTCTATTTGGGTGATAA	52	2
CTTGATTAATAGGGGTTAGT	52	2
CTTTTCTTGATATGGAAGGA	52	2
CTCACTGACTCAAATGTATG	52	2
TTGATTTTGAAAGCCAAAAG	52	2
TGGGAATAGGACATGGGGAT	52	2
GTAGGTAGGTGGCTCTCAAA	52	2
AGACTTTGATCCAGGTTTTG	52	2
GAAATTGCAGTTTCGCTCGG	52	2
ACTGAACAATTTTGGGTTAA	52	2
CTCTGGAGAGGACTTGGCTC	52	2
GGTGAGGGCTGTTGGGATTA	52	2
GGACAGTTTGCAATCTGTTT	52	2
GGATGAAAGCAACCATGATA	52	2
AGGAAACAAATGTACAATCA	52	2
TGAAAGAGCAAAAGAGAGTT	52	2
CTCGACTGATTCTCTTTCTT	52	2
ATTTTGAGCTGGCTTAAGGT	52	2
CCTATGCTATTACAGAGCTT	52	2
TTCTTCTTCTTCCTCCTTCT	52	2
ACCCTAAAGCAAAAGATAAG	52	2
CCCTAAAGCAAAAGATAAGT	52	2
TAGGTGAAGCTTCAAGGTTA	52	2
GGAAGTTGTCAGTTTCTAGG	52	2
TGCTGATTGAAATGAGTTAA	52	2
CTAGGTTTACATCGAAGTTC	52	2
TAGGTTTACATCGAAGTTCT	52	2
CAGTGTTAATATGTGGTGTG	52	2
GGAACTACTGATATTTCACT	52	2
TTTGTTTTGATGTTTGGAGG	52	2
TTTTGATGGAAGGTGAAGTT	52	2
CATCAAACGAGTAATTCTTT	52	2
TGAAATTCAGCATGGAATCA	52	2
TCATCCAAAATTCTCAATCT	52	2
ATTTAAGAAGTCAGTAAGGA	52	2
AGGAGAAGCTGTTAAGGTCA	52	2
GGGCCTGGAACTGATTTCTG	52	2
GGGGATGAGAGTACCGTTTC	52	2
AGCGCATTGGCGTGTGTTTT	52	2
GTATGAGTTGGCTGGATGGC	52	2
CACATTTTTAGGGTATGGTT	52	2
TCAATCGGAGCCGAATCGGT	52	2
TTTAATCCTAGAAAGGAGTC	52	2
ATGTTTTCCACTGGTTGAAC	52	2
GTTAAAGGCGTACTTGTTGA	52	2
AACGGTAACAACAAAAACAA	52	2
TGTGGAGTAGATTGTAGAAG	52	2
GTGCACCATTCGTGATCTGG	52	2
TACCCTAATATTCCCATACT	52	2
AGGTTATTTCTGGTTAACTA	52	2
TGAGGTGAGCTTGTCAAGAA	52	2
CTTCTATGTTCCAAGTCAAA	52	2
TGAAATATCCGACTGGGTAA	52	2
AAACTTCAAGTGGAAGGAAA	52	2
GCTTGGTTTTGAAGAATTTT	52	2
GAAGTATGGTTGAGGGCTGT	52	2
CTCAGCCGATCGAGACGTGG	52	2
TAAATCAATGGAACAGGGCA	52	2
TCCCTAAAGCTAACCCTAAG	52	2
CTGCCCCTACTGTTAGAATA	52	2
GGGCCATTTCCCCAATCCTT	52	2
ATCTTCTATCTTGTCCTCAC	52	2
ACAACTGATGGCGCAAGTAT	52	2
GATTGCCAAGTCTCAGACAG	52	2
GGGTGTTGAACCCCTGACCT	52	2
AGGGATTTTGGTGGTTTGAC	52	2
TTTAGCAAGGTTTGTGTTTT	52	2
TCCGGATTCCGATGGGAATC	52	2
GTACGAGCCGTATCTTTAGT	52	2
GCGATCTGTGGGGATTGATG	52	2
ACATATTTTTGGGTCCTTTA	52	2
CGTATCAGTAAGGTGTTAAC	52	2
TGAAAACCTTTTTCCTCGTT	52	2
ATCTGACTTCAAAGTTGCTT	52	2
AAGGTTTTGGAGGTTTGAGG	52	2
GGGACCATCTAAGGTTTTGG	52	2
GATGGAGTATCATCTGGAAG	52	2
GAAACGGTTTTTCCCTTTAT	52	2
ACACCGTTTTGAAGTATTTC	52	2
GGATTACTTATCCTTTATCT	52	2
CATTAAGGCTTAGCATTCCA	52	2
AGGCTTCGTTGAGCGAAGAA	52	2
ACTTTTTTAGCTCAGTTAAC	52	2
TGACTGTCTCGTGCTCGTGA	52	2
AATTTCATCAGGGAAAACTT	52	2
GGTTGGATCATCCTTAAGGT	52	2
CATAACATTCAATCTCTTTG	52	2
TGTTTGGCAAGGTCTAGGGT	52	2
AACAGGCCAAGACAATAGTT	52	2
GTGTCTCATTTTGCCAGCTT	52	2
CAAACTTGTTCACAAATATC	52	2
GACGATGGCTAGAATATGCC	52	2
GTTGAAGAGAGAGAAGGAAA	52	2
GCCGGATGGGCGTTGTCGGA	52	2
CGTATCTTAGTAGCAGACTT	52	2
AGAAGAGTTTGCAATGATTA	52	2
CCAAAGGGGAAATATCCGTT	52	2
TGTTTAGGTAGTTACTGCTC	52	2
ATATGTTGTGGATAATCAGG	52	2
GGGACCCACACCTTTAAAGA	52	2
ATGAACAAAGTTTACGGATT	52	2
GAGGCGAACGTAGTTGTTCG	52	2
GGTTTGTTTGAATTTTGTGA	52	2
GTGAGTTCTGTTGGGAATTT	52	2
ATCAAGCCACCTTAGAGACT	52	2
CTTGTGTTGACTGTAACTGA	52	2
CAAGATGTCTCTCGAAGATA	52	2
ACTTTTAGGCTTGAAGAAAG	52	2
AATCCAATCAAGGTAAGGTT	52	2
AGGCCATACTGGTAGCACAA	52	2
GCTTAAGGATGGACCAACAT	52	2
CAGTCTGTCGATGTTTGGAA	52	2
AGCAAGGATCATCGGTACTT	52	2
CCGGATAATAAGCACATCAT	52	2
CAGAGCAAAAGGGAAACTGA	52	2
ATAGCAAGTTGGCCTGTACA	52	2
CTTGGGCTTTTTGGAAAGAG	52	2
TTATCTTTTTAGCGCTTGAT	52	2
AGAAAGCTATTGCTGATGGA	52	2
AGTCAAGACAGTTGGAGTTT	52	2
TGTTTGAGGAGTTGGTGAAG	52	2
CTGGGCAAAATTCTGCTTCT	52	2
ACATCAAGAGCGTCCGAGTA	52	2
TAGTGAGTGCTTCTATGAAT	52	2
AAAGCGGTTTGACGCATTTT	52	2
GTTGCTTAATGGTGAAGCAA	52	2
TGTGTTCTGAATCTCACCGT	52	2
TTTCCATTTGAGTATTGGTA	52	2
ATCAACTGTGTACTTCTGCT	52	2
TGAGTCCAGTGAGAGTGTTG	52	2
GCGTGGCGTCGTGTCAGTTA	52	2
AAAAGTACCATGCAAAATAG	52	2
CATATTTTCGAAAGAAAGGA	52	2
TCATCATCAAGCTTTCTGGA	52	2
CGACGCCATCAATCAGCTAA	52	2
ATCTCATAGTTTAGCCAATC	52	2
TTAGTCCTTGAGTGCATAAC	52	2
CACACTCACGTCCTATCACC	52	2
TGTTAACTGGTTAACGGTAT	52	2
GGAGAAAAGAAGGAAAGAAG	52	2
TTACTCTCCTCTATAAATAG	52	2
ATTTGTGGTTGATGGTAAGG	52	2
GACCAAACAGTAGAGAAATC	52	2
AATGCGCGCCATATCAAGCC	52	2
CCGCTAGTAAACCTGCGAGT	52	2
CCAAAAACATCAAGTTCAAA	52	2
GCATCAACCTTGCAGGCTTC	52	2
ATCGATAACCCTTTAGGTTT	52	2
TATGTGGCGGGCGCTCACCT	52	2
GGTTTTGAAACTGACGGGGC	52	2
ATCTCTAGCCTCCTATTCGC	52	2
GGATGCATAGGTGTTTTTGT	52	2
GATTGGTGGATAAGTGTAGT	52	2
TGATTGGTGGATAAGTGTAG	52	2
TGCCTGATTTCTCTATGAAA	52	2
TTGGAAAATGGGGCATATGG	52	2
TGGACGAGGCTAAATATAAT	52	2
AGCATGATGATCTGGTTTTT	52	2
CTTCCACTCCAAACCACAGA	52	2
TCTGTGGTTTGGAGTGGAAG	52	2
TACAACATAAAGGAAAAGGG	52	2
GGTTTGACAGTTTTAGCATT	52	2
GCTCCTTTCTGATCTTGCAA	52	2
TGAAGTTACATATCAGATTC	52	2
TTCGAGAAACTTGCTCTGAC	52	2
AGAATTACCCGCGACTCTCT	52	2
GCTGATACGCGCCATACGCG	52	2
CAAAAATTGCAGGTCTGCTA	52	2
CATAGCAGACCTGCAATTTT	52	2
CACATAGTTTTCGATTTTGT	52	2
TCTGAGAATTGATGATCTGA	52	2
TTCAGCAAATTCCATCCAAA	52	2
AGATAATAATCTAGCAGCCA	52	2
ATCCAACCCATGGCTTCCAA	52	2
TGATCTCAATCCCTTTCTTA	52	2
GATCAGAGATTGGATTCCTA	52	2
TATTAGGGACTACATTCAGA	52	2
TGGAAAACGCTTTAGAAGGG	52	2
GTAATGAATGATAACAGGTG	52	2
CACCCAAGGTCATGCATATC	52	2
GTGGATTTGAATATGAGGCT	52	2
GAAGGTTTGCAGAGAGTGTT	52	2
TCAGCCAACTTTGTATCAAC	52	2
AAAACCCTTGGATCCCAAAC	52	2
TCCTTCCTTTCACCTTCATT	52	2
AAAGGAAGGATTTGGATTAT	52	2
TATAACCAATCTTTGATGCA	52	2
GACATGAGTCGAAGACTGAG	52	2
CCTCAATTTTCTCACCAACG	52	2
TTGAATTGGAGGCCTAATGG	52	2
TCACACTGAAGGACGAAAGG	52	2
GAGGGACATACACCGACTCA	52	2
AAGTTTGACAAGATAGGGCT	52	2
CCTATGAACCATACCTCCAA	52	2
CCATTGGAGGTATGGTTCAT	52	2
ATTGTCTCCCCTACAGAATA	52	2
GGTTATGCTCCATACGCATA	52	2
GAGGTTCGCTGAGCGAGAGT	52	2
GGGGTTCTTAACTTGACCAT	52	2
GGTCAGTTTTGGTTATTATT	52	2
AGTATGTATGTAGGTGGTTG	52	2
TGTTGTTGCTGTGGATACTG	52	2
GGGAAGGTTTGCTTATCACT	52	2
ATCATGTGCCTACGTATCCT	52	2
AGGATTTTGTCTCGTTGTAG	52	2
ACAAAAAACGAAGTGATTCT	52	2
CAAAAAACGAAGTGATTCTT	52	2
TTGAGTTTTCCTGCTGAGCG	52	2
AAGGTTTGTTCACAAGTTTG	52	2
CGCTGCGGGTCATCCTACTT	52	2
TTACACATATCTGTCAAGTG	52	2
AAAAAAATTCCACAAGTGAG	52	2
TAGTTCTACATAGTCTAGAA	52	2
TCTGGAAGCTGATCTGCTGA	52	2
TGGATGGTTGAAGGGCTTTA	52	2
TTGATGGAAGAAGTCTTTTT	52	2
CATCCCAAGTAAGGTTTTGA	52	2
CAAGAGCAAACTTGGTTTTG	52	2
TGATCTGTCATGGAAAGTGG	52	2
GTGGATTCTCTGAAGTTGAG	52	2
GTATCCTTGCAATCAAGAGC	52	2
TAAATATGAATGCAACAGGA	52	2
GCATGACGGACGGGGGGGGG	52	2
CCAAGCAAGATGACCCACAG	52	2
AGAAAGGGAAGTATCTTCTC	52	2
TGTCGACGTGTGAAAATCGG	52	2
CACATTTCCATCGAGTGTAA	52	2
TAAATCCAGACATTTCGTCA	52	2
GAATTTAACATGAAAATGGG	52	2
TTGGATGTTTGGTGTGACAA	52	2
TCAAACTGTAGGAAAAGAGC	52	2
TTCAGAGGTGTTGATTAGCT	52	2
AAGACCTCGGATAGAGGCAC	52	2
GGATTAAAAGCGAATGACTA	52	2
GGATCAGATATTTACTACCA	52	2
TGGCCATGAAGCAAAAATGT	52	2
TCCTACTATGATTTCTCTGA	52	2
TATTCCCAACTTCTTGAAAA	52	2
GTTTGAGCACCATTAGGCTG	52	2
AGTTGTACCCTTACATTCTA	52	2
TGTTTCTCGGTCTTTGGCTC	52	2
GTAACATTTCCCTCAGGTTG	52	2
TTAGGTGTCGTTTGCAGCGT	52	2
AATTGATGGGAAATAGCAGA	52	2
TTGGAAATGCATTAGTTTCG	52	2
ACGTACCAACTCATAATTGG	52	2
TGGCGAAGATAGAACTCTAT	52	2
CCACTGATAGGCATGAGAGG	52	2
GAATGAGGTTTGAGGTTTGG	52	2
ATAACGATTTCTGGAAGTGA	52	2
AATTTGATCGATACGTGTTT	52	2
GGAAAACCCTGATGTCGAAA	52	2
CTCTACAGGTGTAGAGATAA	52	2
TCGAAAGAAAGCTGAAAGAG	52	2
ATGTCATCCTTGGAATGAAC	52	2
CGACTGTGAGACTGAAATAT	52	2
GATTTATTTTCGGTTGGCAT	52	2
TTACAAACCAAAACTCAGCC	52	2
GGAACGGGTGGCATGAGGAT	52	2
TGTGCTAATCATCCTCAACA	52	2
GCTTGATTTAACCTTGATTT	52	2
TTGTGCACTCATTGCCAGTT	52	2
TATCACTGTGTGTGATTGAG	52	2
AACTCAAGATTGAAGAAGGA	52	2
TTTTGATCTTCTCGAGAAGT	52	2
TGACAGGCACCCAGCTAGAG	52	2
TATTGGACAAGGAATTAGGG	52	2
GGCTGCCAAAGGAGTGGAAA	52	2
TCATCTCCACACTCACGTTA	52	2
GAATGTTACTCTCATATAGC	52	2
TCAGGCTTTTCTTTCGCCTG	52	2
ATAATTAAGTTGGCCTTAAC	52	2
GGTACTCGAATTATGCGATT	52	2
GTGAGATAAGGGGCAGCCAA	52	2
TCGACCACCATAAACATTGT	52	2
TTGTAACGTGACCTGGTTCA	52	2
ATGAGTTTTTGGATGATTGG	52	2
GGAATCATTGTTTGAGGTTT	52	2
AATCTTTGATGAAGACAGTA	52	2
TCCTCTCAGGAATACCGTAT	52	2
GAACTTGTCCCAAGACCTGC	52	2
TAGCAATTTCTTGTGTGAGA	52	2
TCCGCATATTGATGTTTTGG	52	2
GTGACAACAACGGCGCTCTG	52	2
GTGTAAAAGTATGGGTTTGA	52	2
TATGGACTGGTGTAAAAGTA	52	2
TTCCTTGACAGTTTGTTCTA	52	2
ACAAAGTCACTGAGTGTTTG	52	2
ACTGTATCGAGCCCTAGGGA	52	2
AAGTCACTCGATTTTGATCG	52	2
CTGCTTCATTCAGCTATAAA	52	2
AGCTGACCAGTTCAATAATG	52	2
GGTGTAGCACACAAATGCTC	52	2
TGTTAGAGAAATAGGGTTTT	52	2
TTCGGACTATACCGTACATT	52	2
GTGTTGTGGGCGCTGAATTG	52	2
GGGCAAGCCTTATGATGCTC	52	2
GCCGATGATTGATGATTTGA	52	2
ACTTTCATCATGGCATCAAA	52	2
CTTTCATCATGGCATCAAAT	52	2
TCTTACGCTAACACACTGCA	52	2
AACAGTCGTTTTTCACACAA	52	2
TGAAGGATTTGCTGGAATTG	52	2
CGTGAGCTACCAGCCAAATT	52	2
AGGGGTTACTTTTGGAAGTT	52	2
GGTGGAATGAAGCCAATCAT	52	2
AAGTAATTGAAGTAAGGGGC	52	2
AGGTTCAAAATAATGCTGGT	52	2
GTGGTTCTGGCACAGAAGAT	52	2
CGCGTAGGTTAAGCAAGAGA	52	2
GGTCCCCAAGAAGAAAGAGG	52	2
GTTAGCTATGAATAGTTAGT	52	2
CAATGTTGGCAATCCAATCA	52	2
GCCAGGCTTATGGTCTGCTA	52	2
CCAAGGGTGTTCATAGGCTG	52	2
TGTCCATTATACTCCTCACA	52	2
ACCCCATGACAGCCCAAAAA	52	2
ATCCCGTTGAGTACAACAGA	52	2
ACTAATGACTGCTATTGTTG	52	2
CTTTTACCCTTTCTGAAAGA	52	2
TATCCACTCCATCATACTAT	52	2
TACCCCATAGTATGATGGAG	52	2
CGATGTATACCACTGATCAA	52	2
TGAAAGCGGTTATGTGCATT	52	2
GGCCCAGCAGTGACCACAAC	52	2
GTCACTACCTTACAACTATA	52	2
CACAAGATTTAATCAGGAAA	52	2
TGAAAAAACATGTTGTGCAT	52	2
CCTCGGATCTTTATCTGTCA	52	2
GAAGAATTTGCTCATATTAC	52	2
AGTTTTTGGTTGATCGGTAG	52	2
TCACAACGATATGAGCAATT	52	2
GGAGGTGACGTGAAGATTGG	52	2
GAAATTTTTCTACGGTTAAC	52	2
TTTGCACTTTCGCTGAGCGA	52	2
AAACTCGAAATTTTAACCTG	52	2
GTAAGTTCGTAGCAGGAAAT	52	2
GAGCGACACTACCGGGGAAA	52	2
CTTCTTGCAGCAGGCACATA	52	2
ACTACCCGAAAAGCAATCAA	52	2
CTCGGACATGTGATTTCTAA	52	2
TGATTTGGAAAGAGAAGGAT	52	2
ACATCAATCTCTGCAATGGC	52	2
GCCAAAGCCATAGTGGAGTC	52	2
CAAAGAAGCCAAAGCCATAG	52	2
AGACCAAGCCCGATTTTCAT	52	2
TACCTAAGAAATTTCCATGG	52	2
TTCATACTCAGCTGTATTGT	52	2
AACCCTGTCACATGTGTTGG	52	2
GGGTCTTGAGTGAATTGGCT	52	2
GCCTAATGGAGGTTTTATGG	52	2
GTGGCCTAATGGAGGTTTTA	52	2
GCATGACAGACACTCCTCTG	52	2
TGCATGACAGACACTCCTCT	52	2
GTAAGTAAAAGAGATAAAGG	52	2
GTTCAGAGGAATGCTCTCAG	52	2
TGAATGGGGTCAAAGCAAAT	52	2
GGGCGACATGCAGGTAACGA	52	2
GGAAAAGTCAAAATTGTGTT	52	2
TGCGAGGTGTTTCCACACCA	52	2
AAGACAAGTGCCAAGTGATA	52	2
AGACAAGTGCCAAGTGATAT	52	2
AGAAGATCTGAAGAAGCACT	52	2
AAAGCCGAGTAATATCTACC	52	2
ATCGGTATGGGATCACATCT	52	2
GATCCCATACCGATGAAATA	52	2
TTTCCATCTATTGTATGTCT	52	2
ATACTTTTCATGGGCTGTCA	52	2
GAAAGGACCTATAATTTTCA	52	2
TAGCAACAGATCAGATAAGA	52	2
GAATAACATGTTGTGGGTAG	52	2
ATAGAGAAAACAATGGGAAG	52	2
GTGGTTTATGAAGGGAGGCA	52	2
GGTAGTTTTTTCCATATCTT	52	2
CTTCTAATTCCTGTGGCCGT	52	2
TTCTAATTCCTGTGGCCGTG	52	2
TTGGTTCCGCAAGTTCACTA	52	2
CTAAATTTCGGTCGAACTTT	52	2
TTCTCAGCCTAAGCATTTTC	52	2
CTAGTCATCAGCCAAGTCAA	52	2
GGCTTTGAGTAGTTTGGCTT	52	2
GGCTGTTGGCATCTGTTTGG	52	2
AATTGTTTTGTCGGTGTTGA	52	2
AATTTCAAAAACGGACTTCG	52	2
CGGAAGTTGAAGCAATTACG	52	2
TGGAGGTAGCTTAGTTAACA	52	2
TTTTTGAGGTGGAATGGTGA	52	2
CAGATGGTTGGTTGGGCTAT	52	2
TCAGATGAAGGTATATTTCT	52	2
CTCAACAATTTATGAATGCA	52	2
ACCTTGAAATTCCATCTTCC	52	2
ACCCGGAAGATGGAATTTCA	52	2
CACGGCACATGACGGGAAAA	52	2
CCCGGATCCTTCTGCTTTTG	52	2
GTTTCAACTACAACAGAAAA	52	2
AAAGGAGAAGAAAGTGCAGC	52	2
AAGGAGAAGAAAGTGCAGCA	52	2
CATCTGTTCTTTGTTGGAAT	52	2
TGCACCTTCCGGACCATCCT	52	2
ACTTCTGGTACAGGGGGTCG	52	2
AGATTCAGAACACAATAACA	52	2
TGACGACTTGATGGATCAGT	52	2
TACTGTGATGCTTCTTTGAT	52	2
TGCAATGAATGATACTGTTG	52	2
TTTAAGTGGCTAGGTTTTGG	52	2
TCTTCGGCTTAGTACATTGT	52	2
ACAATGTACTAAGCCGAAGA	52	2
GATCGAAGGGAACTTTTTGT	52	2
CAAACCAGGCGTCACAAAGC	52	2
CTGAAATGAGTGGCAAATCT	52	2
AAATATCCTTGTGCTTTGGG	52	2
GGGGAGTGGCGATTTCACTG	52	2
ATATTGATGTCTTCATCAGA	52	2
TGTCTTTGCGTGGAGTTACC	52	2
TGTTAACCAGTTAACAGTAT	52	2
TAAGTGCATGATGTTCACGA	52	2
TGGGCAAACTCATCAAATTA	52	2
AAATACAAGTCTTCTCTCCT	52	2
TCATTATAATTGCACCACTC	52	2
CATTTGACTGTTGGTGGAAT	52	2
GAAGATTGAAATGGTATGCT	52	2
GTGAAGGGAGTCAGAAGTTC	52	2
AGCACATGTGTTCACAGCAG	52	2
TTGGGCACCAAAAGACTCAA	52	2
TCTGTACTACTCAGGTGTGT	52	2
AGAGTTGTGAGTAAGGCATC	52	2
AAGAGTCACTTGCCAACAGA	52	2
AGCGTCGTTTCAGAGCCAGC	52	2
GATGAGCAGCCTATTGGTTG	52	2
GGATCAAGAATCAAAAAATC	52	2
GTGTTTTATTGGCATCTCAG	52	2
TGGAGACATTTTGCATTTGG	52	2
TCCATGAACCCTACACCAAA	52	2
AAACTCATAACCAAAACCTA	52	2
GTTAGGGTTCTTCAGCTTTA	52	2
GATGAAACAGTTGAGAGGCA	52	2
GGAATGGTACAGTGACTAGG	52	2
AAAACCTTTGCAAGGGCCCC	52	2
GAATGGTGAATTTTGATTGG	52	2
TGTTTGAAGCTTTATATGGT	52	2
ATGTGGTGAAAGTGGTAAAA	52	2
TTAAAGAGTCTCGGGGTCCG	52	2
GGACCCCGAGACTCTTTAAG	52	2
AAAGTTCTGTGCCAGTTCTT	52	2
AAGAATTGGAAAGACTCTTG	52	2
TAACATTTCATCAAGCAATC	52	2
CCATAGCCTCAAAACAGATT	52	2
CTAGGTGATCCTTTGAATAA	52	2
GCAAAGAAGATTTTGAGATC	52	2
ACCCATGGAGAGCCTCGTCT	52	2
TTTCCCCGCCCCCTGTCTAT	52	2
GGTCGAAAATGTCAAACAAT	52	2
AAGAGGTTATGAGAGGAAGT	52	2
CTAAGTCTCCAAGGAAGGAT	52	2
TTATGACATGCCCCAGTGTA	52	2
TTTATGACATGCCCCAGTGT	52	2
AGTTGGGTTTTCTGTAAGAA	52	2
GTGGTTGAGAGTGCTATTGT	52	2
TGATGCTTTTGTACCTATCA	52	2
ACTTGCTGAGGTCTCCACTG	52	2
CGGTTAACGCGTGGTGACAG	52	2
TTGAATGAGTATATCGTGTA	52	2
GGTGATTTTGAGCATTTGAT	52	2
CATTTGAGGCAGAATGCCTC	52	2
ACGTGAGGCGGATAAAATCA	52	2
GAGGAAAATGGGCGCAGCTG	52	2
AGAGGAAAATGGGCGCAGCT	52	2
ATGGAGGATTGGTCATGGCC	52	2
ATAGAAAAGCATGGTTTTCA	52	2
AGGTAGCCGACAATCGTAAT	52	2
CTCAAGCTGACTCACCGCTA	52	2
CCAAATAAAGTTCCACGTCT	52	2
CCTAGACGTGGAACTTTATT	52	2
GGGCTGTAGGAGATGGAAGT	52	2
GAGGTTCGACTTATATAACC	52	2
ATGTGAAGAGAGCAACTTAG	52	2
TATGGATGAGATTGGATGAT	52	2
TTTATAGAAAAGGTTCTGCA	52	2
AGGTTCATCTTTTTCACACA	52	2
AAATAACCAACATTATCACC	52	2
AAGAGGAAAAGGATTTTTCA	52	2
TTAATTCTTACCAACATGGA	52	2
GAGAGATTCTTTAACTCAGG	52	2
CTCTCTCTGTCCTTGGATCA	52	2
GTGGACCTCAAGTGTAAAAG	52	2
AATTCTACACCCATTCACCA	52	2
AAGTAAAGTGATGTTACTGG	52	2
TGTATGGGGAGGTTTTGGAA	52	2
GATATGTTCAAAAAGGGAAA	52	2
ACTATCGGGATCAGCCGAAG	52	2
GTTGTATGTCAGATCTTGTC	52	2
ATGGAGAACATCACGTAGAA	52	2
AGTTCCTACCCCCCATTGTG	52	2
AATACAGAAGCGTCTATGTT	52	2
TACCACTTTGTCCCGTGTGC	52	2
TTCGAATTTCCAAAATCAGT	52	2
TCAGGAAATCCCAAATTCAT	52	2
AAAAGAAATTGAGTTGGTGA	52	2
GGTCCTTTTATAGGCAAAGT	52	2
TGGGGAGAAACGTGGGAAAG	52	2
GTTTATGTAGTCAGGAGAGT	52	2
TAGGCCTTATGAGTGAGTGA	52	2
GGAAAATTCGGCCAGGCGGC	52	2
ATTGATTTTGTTGAGTGAAG	52	2
CTAGATACTTAACAGAATCA	52	2
GTTTCGTCGGTTAAAAGTGG	52	2
TCATCGCATGCATACGCTAT	52	2
ATGAACAAGGAGAAGTCGTA	52	2
TCCAACTTGTATTCTTGGTA	52	2
ATAGACACGGGCCTCGTACC	52	2
TTTCGGTGTCGTTTAAGTTG	52	2
GAAATATATGGGTTGATCAT	52	2
GATGGCTATGAGAAGAAGGC	52	2
AGAAATGCGCTGAAGCTACA	52	2
TTTGGAGTTACTAATGCGTC	52	2
CCTGGTGCAGATCCTTGCAA	52	2
TCTGCAACGTCAAAATCTGA	52	2
TAACCATGTTCTGCAAGATG	52	2
TCTTGACAGGCAGAGTTATG	52	2
TGTTTACCCTCGTGGTAATG	52	2
GATCATGTACGGTAGAAATT	52	2
TCTGGAAATTGACGCGTTCG	52	2
TACGCTAAGCCTCTGTTATT	52	2
TTTCTCAATAACTTGAACAG	52	2
ATGTTGTCTCGCCAAAGATG	52	2
TGGGTGATAGCTTCGGTAAA	52	2
TTTGCGATTCGCGGCGCGAC	52	2
GGTCCCATTTTTTCCACTTC	52	2
TCGCTCAACGAACCACTCGC	52	2
ATTACAGTAGATCGACTCAA	52	2
GAGTCGATCTACTGTAATTC	52	2
AACCGTTGGGTTAAGTGACC	52	2
TGGTTTTTGTGTTAAAGTTG	52	2
AACCACATCTTTAAACAAGA	52	2
GGAATGGCTGTTTGGGCTAT	52	2
GAATGAAGGTTTCCTTCTGA	52	2
ACTAGATCAGTCCCCGACAA	52	2
ACCATGCAGTGTGTCAATAT	52	2
AGGTTACTACTGGTCGACCA	52	2
GGGTAGTGAATGTTGTAAAC	52	2
ACTGGTATTCTGATACTGCT	52	2
CTGCACGTGTATTTTTTAGT	52	2
AAAGGTTGAGTTTCTGATTT	52	2
TGAAGATTTGGGCAAGTGTG	52	2
GTCCTTTCCAGGCATGAAGC	52	2
AAAATACAGGAGATTCTCTG	52	2
TCAATGTCAAAGCCTTTATG	52	2
AAAGATTGGAGCATTGGACT	52	2
GAGCAGCTAGTGTAATGGTT	52	2
CAGTTAGCCTTAGGTGACTT	52	2
GGATATTGCTGATTCCTTTC	52	2
TGGACGTCAATACGCACAGA	52	2
TGGTTCCTACCGATACTTTG	52	2
GCAAGCCATGGTGAGGTCTG	52	2
TTTCATGTCATTTTCAAAGG	52	2
AAAGGGATCTGAGTTCTGAT	52	2
GAAAGGGATCTGAGTTCTGA	52	2
TTGAAATCTGCAAGCTGCAG	52	2
AAGTAGATGTTGTGTTGCAA	52	2
TAGAATTAACAGTTTTCCAC	52	2
AAGGGCATGACGCCCGTCAC	52	2
CGTAAGGGAAAATTTGAGTT	52	2
GCCACCGTCAAAAATATAAC	52	2
ATTTCCAAGTGTCGTGCAAA	52	2
ACCTGAAAAAGAGAATCTGA	52	2
GGGTTTTGGCTAGGGTTTGG	52	2
CTTTTATCATGGAGTTAAGA	52	2
ATGTAATCGGTCGCGAAGAC	52	2
TTCCTCCTCCTTTCATAGTA	52	2
TCAGAAAAGGCTCTTATATA	52	2
GGTCAGTTTGTTTTGAGTAA	52	2
TCAATCACGTTTGACACCGT	52	2
TTCTCTGATACCTCTTGCTT	52	2
CTCCTTCTTCTAGGTGCAAA	52	2
AGGAGAGTGTGATAAGATAA	52	2
AACAACTACTTTAGGATACA	52	2
TTATTTCTTGATGTTGCTGC	52	2
ATGCATGTAGCAGTCTCACT	52	2
CAAATTGCAACAAACCAAAA	52	2
GCATCCACATTCACAGGACG	52	2
GCACAGGTATCTTCTGCATA	52	2
GAATTAACTGAATATAGGAC	52	2
TAGGGAATGTTAGAATCTCA	52	2
CCAACATTTTTTAGACCAAA	52	2
GTCTTATAATAGTCCATGGA	52	2
TTTGAGGCAGGTTATGTTTG	52	2
GACTTTGGGACCATGATGGA	52	2
GATGATTGTTTGAAGATTAG	52	2
CTGTTATGACTTCTTCCTTC	52	2
CATTTAGAAACTATCCCCAA	52	2
GTCTCTTTGGAGTTGGTTTA	52	2
ACGGAGCCACTACCGAAATC	52	2
TGTTATGAATGTGGAAAGCA	52	2
GGAGGAAATCCAAATGGAGC	52	2
ATCCAGAAAGTTTGATGATG	52	2
GTCTCATTTAGAGTCGTTTT	52	2
CAACTTATCTTTAGCCTCTA	52	2
GATGGTTACCGATTAGAAAT	52	2
AGACCAAGCCCAATCTTCAT	52	2
TACCTGTTTTAACTCTGAAG	52	2
TTCACCAAATTGAATGATCT	52	2
GATCATTATCCGTAGCAATA	52	2
GCTTTCAGTCCTTATTGCTA	52	2
ACGGAGCCACTGCTGAAATT	52	2
TTCCTTCCATTAATGCATTT	52	2
GTTTTGATTGAATAATGGTC	52	2
AAATCAAACCAATCAATTCG	52	2
GAATGAATGATATGATAGCT	52	2
TGGATATCAAGAACCAGTCC	52	2
GTATTTCGAATGCCAATCCT	52	2
TAAGGTTCACTTCTGAATTT	52	2
AATCTTAACAAAATCCTCGC	52	2
GTTGAATTCCTCAGTACACA	52	2
GATCCAATTGAGGGAGGAAC	52	2
GGGATTTTTCCCTTTATAGT	52	2
TTAAACAAGACGGGGACAAA	52	2
ACGGTTCAAGCGAACGGTCA	52	2
GATTCTCCTGTATTCTCATT	52	2
ATCCCTTTACCTTGACTTTA	52	2
CTATGACCAGAACCCAATGG	52	2
GTTTTGTGTTGAGACTTCAT	52	2
AGTAAGTTTCTTCTGGATAA	52	2
ACAGTGAGGATCAAGAAACC	52	2
CGTGTAAACTTGTGGATTGG	52	2
TGTGAGCATTCCTGGACAGC	52	2
GATGATTTGGTTAAGTTCTA	52	2
GCTAAAGTTCACCTGTAAAG	52	2
GATGATGAACACTTTGTTTT	52	2
AAGAATGAGCGAAACCCTGA	52	2
ATGCCATTTAGAATGGGCTT	52	2
GGAGTTCGCTTGTGAGGAGG	52	2
GCTTTTTGAAGGAGAAAGGA	52	2
GCTTGGAAGATGGAAATTTT	52	2
AGATGGAAATTTTGGGATTT	52	2
TTGAGTTTGCTATCTTCAAT	52	2
GAGGGCATCCGTGCTCTGCT	52	2
TTCTAGGTTATCCTTGAGAT	52	2
[truncated: 58,001 more rows]

## Sheet: Guide Pool 7
gRNA target sequence	number of targets	Relative frequency
AGGTTCATGGTCTGCTTTTG	44	1.69231
ATCTACGCCACTATAGTTTG	44	1.69231
ACAGTCAAACAATCATGGCA	44	1.69231
AAACAAGATGGGGACGTCAA	44	1.69231
CTGGGGATAAACTTGTCTTC	44	1.69231
CTGATTTAGCTCTTCTTCCA	44	1.69231
GAAGAAGATGAAGAAGAACA	44	1.69231
CTGCCTCGAAGGCCTGACAG	44	1.69231
AATCTTTTGTTCAGCATTGC	44	1.69231
TATATGATAGGCCTGGATTT	44	1.69231
AATGAAAGATTCGTCTCTGC	44	1.69231
GTACCCTTGAAGTGCAATAA	44	1.69231
AATGCAATGTTTTGGGGTTA	44	1.69231
GACGAAGAGCTTTGGAAGAT	44	1.69231
CCTTATGATGAGGCTAACAA	44	1.69231
CCCTTGTTAGCCTCATCATA	44	1.69231
GTGAACTTGGGTAGCATTTT	44	1.69231
ACATTAATGACCATGTGAAT	44	1.69231
CTATGTTTGTTGCATCTCCA	44	1.69231
AAGGAGGTCCTATTTCTGTT	44	1.69231
ACCAAAACCCTAACAGAAAT	44	1.69231
GCCCGTGGCAGGCATTTTTT	44	1.69231
CACTTCACAAACCACCAATT	44	1.69231
AAATGGTGATTTTCTGGCTA	44	1.69231
GGTCGATGCTTTCGCTGCCA	44	1.69231
CTAATGCCAATTGAAATTTC	44	1.69231
TGCCTTTCACCAAGGGGCAC	44	1.69231
AAGGTGATGGTTTGGTCTTT	44	1.69231
CAAACTTTTTAGGGGACTTA	44	1.69231
GACTGTTTTTGGTCTGTTGG	44	1.69231
CATGTTCAAAATGGTATTTG	44	1.69231
TATGGGCTTGAAAAGGTAAA	44	1.69231
GAAATCCAGCAGGTCTTCAT	44	1.69231
CCCCAACTTGAAAATTCCTT	44	1.69231
GCTGTTAAGTGAGATTTTCT	44	1.69231
TAGTGTATGGTGAGAATACT	44	1.69231
ACAACTAGGGATGTCAACAA	44	1.69231
AAAGGTATTTTACTGCCTAT	44	1.69231
TTGCCAATCAATTTTTCATC	44	1.69231
CTTCATCATGAAGCCACATA	44	1.69231
CACACCACTTCAAAAGATAG	44	1.69231
GTTTCCTCTATCTTTTGAAG	44	1.69231
TACCAGAGGGTAACCACTTA	44	1.69231
AATTCAGAAAGATCATCCTA	44	1.69231
TGTATGTTGTTGTTGTTAAG	44	1.69231
TCAACCAATTCCCATTTTCA	44	1.69231
AGAAACATGACCTATAATCT	44	1.69231
TCCATCTCATGTCATCCAAA	44	1.69231
GAGCATTGTGTGACTGTTTT	44	1.69231
TTTGCATTTTGCAGGAATTT	44	1.69231
AAATCGATCCAAATCTTTAC	44	1.69231
GCAGGATACGATCTAGAAGG	44	1.69231
AGAGAAAAACAAGCAAATGG	44	1.69231
TCTGACATTCTCACAGAGTC	44	1.69231
ACCTTTGGAAACTGTCAACC	44	1.69231
GGCACATTCGTAACTCCGAA	44	1.69231
TCCCTCTTACTATCTCTCTT	44	1.69231
TAGCAGAACAAGGTTGTTCG	44	1.69231
AACGGCCATGATAGAAGCGT	44	1.69231
AATTGGTTTTAAGCCAACAA	44	1.69231
ATGGTGTTTCGATGAAGATT	44	1.69231
TGGGGCCATGTTTCTGATCA	44	1.69231
ATTCTCTATTTCCAAATGAC	44	1.69231
GAAACTGTTGCTGCTGAGGA	44	1.69231
CTGGATGCAAAGAGAAGAAA	44	1.69231
TTTCTTCTCTTTGCATCCAG	44	1.69231
AAAAAGCATCGAAGTTTTCA	44	1.69231
ACAGAACTGGCGACTCTGCC	44	1.69231
TGAGTATCTGATGCAGATTT	44	1.69231
AAACCCTTAGAAAAGGTACT	44	1.69231
AACACTTTCCACACAAGGTG	44	1.69231
TATATGTTGGTTGTGTTGTT	44	1.69231
TCTGTTGTCTGGGTTAGATG	44	1.69231
GGGGAGTAGAGGAAGGGGTA	44	1.69231
ATTGGCTTCAGAGATAGATA	44	1.69231
TGAAATTTGGTGTTTAAAGG	44	1.69231
TTTCAGATGAGTAGTGGGTC	44	1.69231
TTATTTTCAGTTGGTTTGCA	44	1.69231
GGACAAGGTGGCCAAGGCAT	44	1.69231
ATAGGATCTTATCATGGATT	44	1.69231
AACATCTCCAACTAGAAGAT	44	1.69231
TAGCTTAGCAGGAGCTTCTT	44	1.69231
AACCACTCTTGCGCCCCATC	44	1.69231
ATTGATGATGGTATCGAATT	44	1.69231
TGCTGGGTGCCTGGATAGAG	44	1.69231
TAGCCCTAAGGTAAGGATTA	44	1.69231
AAGTGTGCAGATGGTTGGCT	44	1.69231
GATTCCTTTCTGGTACCTGC	44	1.69231
ATGAGAAAGGGTTTTGTCAT	44	1.69231
AACTTGAACATGGGCTTGCA	44	1.69231
GGAATCACATGTTTTAAATG	44	1.69231
GTTAGGCAAAAATACAGCTG	44	1.69231
TCTGGATAAGGAATAATCTG	44	1.69231
TAGGGTGATGACTTGTACTG	44	1.69231
ACACTTCAAATGGGGCACAA	44	1.69231
AGATTGGAGAGAGCAGTAAC	44	1.69231
TCTAAGGTTTACCTGCCAAA	44	1.69231
CATTGATTTTGATGAGTGAA	44	1.69231
TTAGATCTGTTTTGATGGTA	44	1.69231
TATCTTAAAGAGTGGGATTT	44	1.69231
GAGGGATACAATTGACTGTA	44	1.69231
CTGAAGAGGTTGATGACTGG	44	1.69231
ATTTGGTGTTGTTTTGGGAC	44	1.69231
GTAGGGGAACTATACATCCA	44	1.69231
GTCTTCTGAACAGATGCACT	44	1.69231
TCTCGATGAGGAAATCTACA	44	1.69231
GATGAGGATTAATCATTCTT	44	1.69231
ATCCAAAGGAAAGAACCTGT	44	1.69231
TTGAATAGGGCCAGCCCTAA	44	1.69231
GCCCCAAATGGGAGTCCAAA	44	1.69231
AATCTTCCTTCATCGGCAGA	44	1.69231
GTGTGGCATCGTGTCAATCA	44	1.69231
GTTGAGGGTTTGGTGGAATG	44	1.69231
CGGCGCGAAGAAGGGTGGCG	44	1.69231
GCGAAGTTGTGTCTTAATGT	44	1.69231
TACAGAGTCTTCTTGAGAAT	44	1.69231
AATTGGAATGAAAGCAAACC	44	1.69231
GGGTTGGTTAGGCAAAGGGA	44	1.69231
AGAGCATAACCTATGTTAGA	44	1.69231
TACCTTAAATGTTGGGATTT	44	1.69231
CACCTTCAACTTCTATATAC	44	1.69231
AAGATGAGCAGTGACTGCTG	44	1.69231
TGAACTGATAGCGACCCGAC	44	1.69231
GGATCTGATCCTTTCCCAGA	44	1.69231
CAACAGCTTCCAGCTCAGTG	44	1.69231
ACGCCGAAAAGTGTTAAATT	44	1.69231
GGGAATTAATTGGTAAAAAG	44	1.69231
TGCTCAGAGGTGGCGAGGAC	44	1.69231
TCTATCAAATCAATGGAGAT	44	1.69231
GATTTTGCTTCCCCCTATTG	44	1.69231
CACATCTTCATCACTCATCA	44	1.69231
GTTTTTGGATGGTTGGTGAA	44	1.69231
TGAGTTTCAAAGGTTGGGAT	44	1.69231
AACATTTGGAGTATTGTTTG	44	1.69231
CATTCATGAACTGTTAGAGG	44	1.69231
CATCGATTATTTTCACCAAG	44	1.69231
ATCGATTATTTTCACCAAGT	44	1.69231
GTTGATTTTACTGGGTTTAC	44	1.69231
GAATGTGGTAATTCCATAGA	44	1.69231
TAAATGGATTGGGTTGATTT	44	1.69231
TGAAAGAAACTCCTACTTCT	44	1.69231
ACTAATCGTCCATCCCCCCA	44	1.69231
TTGTGCTACCCATGGGGTTT	44	1.69231
AGTTAAAGTTTCAACGAACC	44	1.69231
ACTACGGGTACCAACATTCT	44	1.69231
CAGGCGAGCGAGCGCTTCCT	44	1.69231
ACCAGTGTTTTAGTCGAAAC	44	1.69231
GTTGTGGTGTCCGAGAAAAA	44	1.69231
GAGAAAAAGGGCAATGATGA	44	1.69231
CTTTTGGCGTTTGATTGGGG	44	1.69231
CATAATCGTATGTGGATAAA	44	1.69231
GCCATTTGGTGTAGGAATCA	44	1.69231
CAACTAACAAAAGTATGGTA	44	1.69231
GCTAAATTCTTCCTCAGTAA	44	1.69231
GCCTTGTGCTCAATCTAAGT	44	1.69231
GATCTAGTTAGATCAGATTC	44	1.69231
GGTGGAGAGGTGAGAGCAGA	44	1.69231
CAGCTCATGTCCTTATCACC	44	1.69231
GGTGAGACTGGTTTTTAGGC	44	1.69231
AACTGTCTTGATCTGTTTTA	44	1.69231
ATATGATGACTTCATCATCC	44	1.69231
TATGATGACTTCATCATCCA	44	1.69231
ACTAAGAAGGTGGGCCGCCA	44	1.69231
AGAACCCAACGCGATTCCAA	44	1.69231
TGACAGTCCGCACATCAACT	44	1.69231
GTTGAACATCAGAAACCGGC	44	1.69231
AATCTCTCCAGCTACGTATA	44	1.69231
TACCGTCACTGACGTAGTGC	44	1.69231
ATTTTTTGCAAACTGGTTGA	44	1.69231
CGTCTAGTTGCCTCTACCTG	44	1.69231
CCCCGACCTACCCTCCGAAT	44	1.69231
GCAAGCCAAATAAGAAGTGA	44	1.69231
CAAGAATCTCAAGAAAGAAA	44	1.69231
AAGACAACGGAAAAGGAATA	44	1.69231
TGGAGGCACTACAGGCCTCT	44	1.69231
TGGCAGCCAAAGCTGATGAC	44	1.69231
ATGTAACTTACAGATTTCCA	44	1.69231
AGCATCTCATCTCTTGTTGT	44	1.69231
TTGCTGGTGAAGCTGATGAT	44	1.69231
GTTGGGATTAGGTTATAAAA	44	1.69231
CGCATGCATTGAGTCTGTTG	44	1.69231
ATGTGCCGGATGGGCGTTGT	44	1.69231
CAGAAGTTTGTTGTCTTGGC	44	1.69231
TTTAGTTTTGAAGGGCGCGT	44	1.69231
AAAGAATTCAAGGTTTCGAA	44	1.69231
AATTTTTGTGCCTGACTTTT	44	1.69231
GTGATTTTTCATGACAGTTG	44	1.69231
TACTGGTATTCTGATACTGC	44	1.69231
TGGTTACTGCTCCAACGCTA	44	1.69231
TCCCCTTTGCCATAACTGCT	44	1.69231
AACTTCATCCACGTTGGGAT	44	1.69231
ACCGAATGGATGAAAATCCC	44	1.69231
TGGAATGAATCTGGATAGTC	44	1.69231
AATTTTTGGAATGGTGGTTT	44	1.69231
CATTGAAGGCAACACTTGTA	44	1.69231
AACTGTTTAATGTTGCCCTT	44	1.69231
TCCTGCTCTTCTTCTTCAGA	44	1.69231
AAGTGTAGAGAAGGTTTTTG	44	1.69231
AAAAAGAAACAAAAGGTCTG	44	1.69231
TGCCGATGAAGAAGTAACTT	44	1.69231
AGCCCAAGTTACTTCTTCAT	44	1.69231
TGATGGGTTGTGTTGATTTT	44	1.69231
GTTGGAAAAGAGAAGCTTGA	44	1.69231
TGACATAGGGAGGGATATTT	44	1.69231
GTTTGAGAATGGCAAATAAA	44	1.69231
GAGGTTGTGCTGACCCTACT	44	1.69231
AGTACGGAACTGTCCATCTT	44	1.69231
TCCAACCCTTTGGAATGAAG	44	1.69231
AAAAGGATCTGTACGAGGTT	44	1.69231
GAGAAACACTGACTCTCTTG	44	1.69231
TTTGATTTTACCGAGTCCGT	44	1.69231
TTCTCAAAGCAGTCCCAACT	44	1.69231
CAGGTGTTGTTACATTAATA	44	1.69231
GAAAACTTTTGTGACTCCAA	44	1.69231
CGAACCCGTAAACTCTTAAA	44	1.69231
TGATTGTTACTTACAAGGAT	44	1.69231
GAAGATGATTGTTACTTACA	44	1.69231
GAAAACAAGTTCATGCTGAA	44	1.69231
ATCGACGGAAAATAAAATGC	44	1.69231
TACTGGGGAAAAGCCTTCAA	44	1.69231
GCAAAGGGTGGACTTTGTGA	44	1.69231
TTACGTGGGCTGTGTTCAGG	44	1.69231
TACGTGGGCTGTGTTCAGGA	44	1.69231
GATATTGCCTTTTTGGTGAT	44	1.69231
GAATTAAGGTCAGGAATAAA	44	1.69231
GAACGTGAAAGGAGTCAAGG	44	1.69231
ATCTTTAAGTGTATGCAAGA	44	1.69231
ATCTGATAATTGTTTTCTGG	44	1.69231
ATTGCATATCATTTGAGCAT	44	1.69231
GTAACTAGAGATGTAGGTTC	44	1.69231
ATTTATAGGCTTTGACTTAG	44	1.69231
AATTTGCTGGAATTGCAACA	44	1.69231
TTGGGATTTGGATAAAGGAA	44	1.69231
AAAATAGGCATAGAAAAGCA	44	1.69231
CTTGCATCTGTTTTCATGAC	44	1.69231
GGGAAGTGTTTTCTTAGAAA	44	1.69231
TCTTTGACACACCAAGTGAG	44	1.69231
GAAATTGGTATTTGGGATTC	44	1.69231
ACATGTGTGTAGAACACTGT	44	1.69231
TGGAAATCACTGCTTAGTCA	44	1.69231
CGGAATTTCTTGTCCTCAGC	44	1.69231
CGATCATGTCCCGCGAACGT	44	1.69231
GATAAAACTTCTTCTCTTGC	44	1.69231
ATGGAACCTGGCTAGGGTTT	44	1.69231
CGACATTATTCCATTTATGA	44	1.69231
GGCTCCTCAGCCGTCCAGAG	44	1.69231
GCCATGGATTCATCAAGCTA	44	1.69231
ATGTTCATGGGGTACCTTGA	44	1.69231
GGCCAGACTTTGTGAGGGCT	44	1.69231
GGAATGAGGTCATACGCGTA	44	1.69231
CTGGCTTCTCTCGCTGAGCG	44	1.69231
CAGGATGTCAGCATCTAAAT	44	1.69231
GCTGTTGAATTGTTGAATGT	44	1.69231
CAAACAGAAAAAGAAGTTCG	44	1.69231
TGAGGGAAAATAAGAGAAAG	44	1.69231
AATGAGGGAAAATAAGAGAA	44	1.69231
TTGTACCTACTGCCTGGCTG	44	1.69231
TGTGGTTTTTGGGGAATTTT	44	1.69231
AATACTATCCTGAAGATGTG	44	1.69231
TACCCCACGCGAGGACGACC	44	1.69231
TGTCTTTCCAACCTGATTCC	44	1.69231
AAGTGGAGTTTGGTCTGTTT	44	1.69231
GTTAGCACCCCTTACGTCTG	44	1.69231
TCATATGAAACAGGTCGAAG	44	1.69231
TGATAAGGGAATGGCTGATA	44	1.69231
GGACGAATTACAATTTAAAG	44	1.69231
AAATAGGAGTTCCCCACTCT	44	1.69231
TAAACTGAAAAGCCCAAACG	44	1.69231
TGTTATAGGCAAGGGGCAGA	44	1.69231
GTAAAACGCAGAAGAGGAAA	44	1.69231
CACAATATCGGTGTCCAATC	44	1.69231
CATTTGATTTTGAGGCTTTT	44	1.69231
GACTTGGAGAAATAGGCATG	44	1.69231
TTTCTGAAATGGTTGAGAAA	44	1.69231
GACCAGAGCCCGGTTCCAAG	44	1.69231
ATTTGTGATAGACCTCTTGC	44	1.69231
TGAGTGTGAGAGATTGTTCG	44	1.69231
GAAGTAGATCTTGGCGAAGA	44	1.69231
TGACATGGCTCGAAAGATCA	44	1.69231
GAGGAGTGAGGGGTTTAGAA	44	1.69231
AGCTGAGGTTTTGAAGGTTA	44	1.69231
CACTCCCCAGGAAAGCTTGA	44	1.69231
CAGGAACGATCCTCCTCCTA	44	1.69231
ACTAAACCCCTAGTCTCTCA	44	1.69231
ATAGATGGTTTTGGAAAGAA	44	1.69231
GTATGGAGGGACTTCCCAGG	44	1.69231
TTGTGAGTTGATCACTCCTT	44	1.69231
AGTATACCAATTTACAGCTT	44	1.69231
TCAATCTCATATGCCACAAA	44	1.69231
CCACACCATGGCATGACGGG	44	1.69231
ATGGTGTATGAACTGATGTG	44	1.69231
GGCAATTTTGAATTTATTCG	44	1.69231
ATTTCTCCAGCAAAGTTGGC	44	1.69231
AGGTCAAAAGGATAAAATCA	44	1.69231
TACTGAACCATTCACTAATG	44	1.69231
CTGCAGGCAGAACTGCCTCG	44	1.69231
GTCCAAAAAGAAGCCGTCCT	44	1.69231
GGCAGAGGAAAATCATCCTT	44	1.69231
ACAATGGTTTCTGGAAGTTT	44	1.69231
ACCACATGCATGACATTGTT	44	1.69231
ATGTTAAATACTGAATGGGT	44	1.69231
CGAGTCACATCGCATGAATA	44	1.69231
TACGCAAAACAGACCAAAAA	44	1.69231
CAGAACATCACTTGATCTGA	44	1.69231
CTTTTCTGTAAAGTCTTTTC	44	1.69231
GTGAGTTTATAGGTCATTTT	44	1.69231
GTCGTACAATCGTCCAAGAA	44	1.69231
AATCGTTTCTTCTCCCCAGC	44	1.69231
GGTACCGCGGGCTGCTGTCT	44	1.69231
TAACGCCCATTGATTCTGCC	44	1.69231
GAGAGGGAAAGGAAAACATT	44	1.69231
CTTGCTACACAACTTCATCA	44	1.69231
TATTGTGATTAAGTCTGACG	44	1.69231
TTTTGACGTGAACGCAGAGA	44	1.69231
TAAAAAGAGACTAAGAGATG	44	1.69231
ACCGGGATAATTGAAGATTT	44	1.69231
CAAACATGTCTTGAATGCAA	44	1.69231
GGTGAAAGATCCATTCCAAA	44	1.69231
CCCCAAACTTAGTGTATTTA	44	1.69231
TCCCTAAATACACTAAGTTT	44	1.69231
GAAGAAAACTTCTCTAGTTT	44	1.69231
TAGAGAAGTTTTCTTCCTTT	44	1.69231
AGGGTTTGTGGACTGGTGTG	44	1.69231
ATCTCTTGCAAAGTCGCAAC	44	1.69231
TGAGGCGAGCAAATCAATCC	44	1.69231
GTTGATAGCAATGATGAATT	44	1.69231
ATTTCAAGGAAGTTTCATGT	44	1.69231
CTGCTCCTGAACTTTTATCT	44	1.69231
TAGAACGATATGACTGTCAA	44	1.69231
CTACCCAATAATCCCATATT	44	1.69231
TTACAAGGATCTGCACCAAG	44	1.69231
AAGAGAAGTAAACGAAAATG	44	1.69231
AACATGAAAAAGTTGTGGGA	44	1.69231
CATCTCTTGCTCGACCAATG	44	1.69231
GCATTAGAGCGCCTGGTTCT	44	1.69231
AGTTGGGAAAAGAGAAGTTT	44	1.69231
AATCATTACTATCAGAATCC	44	1.69231
GAATCATTACTATCAGAATC	44	1.69231
AGGGATGGGTTTGAAGGCCT	44	1.69231
TTCGGTATTTTGCTTCATGT	44	1.69231
GGTCATTCGCTGAGCGAAGA	44	1.69231
GCTCTACACGTTGTTTCTTT	44	1.69231
ATATCTTTTTGGGTCCTTTA	44	1.69231
GGGACGTGAGAGACCTTTGC	44	1.69231
AAGCGTTGTGTCTATGCCCG	44	1.69231
TCAAAAAGAGTGGCCTCAAT	44	1.69231
AAGGCGGACAATAGTTCAAC	44	1.69231
GATGGTTAATAACGTTTAGG	44	1.69231
ATAGGATTTGGGTGAATTAT	44	1.69231
ATTATGTGTCTCGCTAAAAT	44	1.69231
TTGTGTAAAGCACTACGTCC	44	1.69231
CAACAAGGGAGTTCATCTAT	44	1.69231
TTTCGACGTCCTGGTTAATG	44	1.69231
TTATGATGTGACTTCGGTCT	44	1.69231
AGTGTATGGAAAGACTAAAT	44	1.69231
GCAGATGGTTTGTTGGGCTG	44	1.69231
AACTCTGGAATCTGAAACTC	44	1.69231
CAAAAACAGCCCACTAGCTT	44	1.69231
GTATATGGATTTGATCGGTG	44	1.69231
CAATGTGGATAGAAGGTTTT	44	1.69231
GTGATTACTTGAAAAATGGA	44	1.69231
TAGAAGTTCAGAAACTAGTA	44	1.69231
TATGACATTTGGAGCATGTT	44	1.69231
ACTACTTCTTGGTCGACATT	44	1.69231
CGGTTATGCATTAATATGAC	44	1.69231
CATATCACATGTTTATAGTG	44	1.69231
TACCAGGCACTACTGTTACC	44	1.69231
TGGTTGGGAATTAGACTTAG	44	1.69231
CAACTGCTTCATCTCTGGCT	44	1.69231
AGACAAGATAGTCAAACATC	44	1.69231
TTAGCATGGCAGATGGTTTG	44	1.69231
GGTCCTAAGGTTAGGATTAA	44	1.69231
ATGTGCATGCTCCTATCAGA	44	1.69231
CCAATCCTTCCATACAACCT	44	1.69231
CCTTCCATACAACCTAGGTT	44	1.69231
CCAAACCTAGGTTGTATGGA	44	1.69231
AGATAGCCGGAGGCTATTAG	44	1.69231
CAAGATCTCAGTGTCGAGAG	44	1.69231
GTCGCGACTTCGCTGGGGAA	44	1.69231
ACGGGTTCTAAAAGTTTCCA	44	1.69231
TGGTTATTTGAGGTAAGGCT	44	1.69231
TCTCTTGCTCGACCTTTGTG	44	1.69231
TCAACCAACTAAACTTTAGT	44	1.69231
GTTTTCTGGCGCGCTCATAC	44	1.69231
AGTTTGTTTAGGGTGATCTT	44	1.69231
GCTCAAAAGGGTATCTTTTT	44	1.69231
TTGAGAACTGGTGTGAAAAG	44	1.69231
ATTGTAAGCACTTTCAATCG	44	1.69231
CAAGGTTTCAAACCTATTTG	44	1.69231
TGATGCGTTTTGGTGTGTAT	44	1.69231
GTATGTTCAGATGGTGGTGT	44	1.69231
AAAGCTGTGAAATTAAGAAG	44	1.69231
CTACTCTACCTAGAAACATA	44	1.69231
TCGTAATGCCATGTATTCTT	44	1.69231
TCAGTAATCTCTCTTCCTTT	44	1.69231
AGGACACAACTAATCAGATT	44	1.69231
AGAAACTATCTCTGAAGATT	44	1.69231
GAAACTATCTCTGAAGATTT	44	1.69231
AAGATCACATGAGCATTAAA	44	1.69231
TTTCCTCTTTTTGGATTTTG	44	1.69231
CAACATCAAAGGAAACTACT	44	1.69231
CTGGTGGCAACAATATATAA	44	1.69231
CTAGTGAAAGTTGTCTGGTT	44	1.69231
AATCATTATGCCCCAAGTGA	44	1.69231
GGGCGAGAGAGAGGCGAGAC	44	1.69231
TTTCTAACTTCCTTCTCCTT	44	1.69231
GCAAATTAGAGGGTTGCATG	44	1.69231
GCAAAGAAACTGCAAATTAG	44	1.69231
GAGTATCGTTGATAGTAAGG	44	1.69231
CGCTAATCCAATCAAGGTAA	44	1.69231
CTTTATAGGTTTTGACTTTG	44	1.69231
GTGCAGACTCGTCTGGTTGA	44	1.69231
GATACAAATTTGGTATAGTC	44	1.69231
AAGACAAAGATCCTTCACTT	44	1.69231
TTATTCGAAAGCAACAGGAA	44	1.69231
GATCACGAAGGAAATGATGG	44	1.69231
CTCCTCTGTACTCTGTTAAT	44	1.69231
GTTTGTGATTTGGATGTTTT	44	1.69231
TTGTGATGAGCATGGATAGT	44	1.69231
ATGTTGAGAATTTGGATGGA	44	1.69231
TCCAAGCACCGAAGGACTGT	44	1.69231
CGCGTAAAAACAGACCAAAA	44	1.69231
CGGTATTGACCTCACCGATA	44	1.69231
TGCATGAATACCTGCTGAGG	44	1.69231
CTGCGAACTCTGTAGATTCG	44	1.69231
GGTCGATCCTGCGAAAGTAA	44	1.69231
GTGGAACGATCATTATGTGG	44	1.69231
AAAACCATCAACGACCACCA	44	1.69231
ATTATTCAAGTTCCGGATTT	44	1.69231
GAGGAGATTATGAGAGGAGA	44	1.69231
GTTTTGAATTTTTGAGGCAA	44	1.69231
TATTTTGTAGGACACATCAA	44	1.69231
AGGCCAATTGATCAAACAGT	44	1.69231
AAAACCCGAAAGGGCGTCTT	44	1.69231
TAATGATGATGTAGGGTGTT	44	1.69231
CTTTTATAGGTGAATGAAAG	44	1.69231
CAACAATGCTCATTACAAGA	44	1.69231
CCATCTCCCAATATGTGGTC	44	1.69231
AAGCAAAATGGGCGCAGCTT	44	1.69231
AACGCAGCTTTCCAACCATT	44	1.69231
TTGATCTATTCTTACGTGTG	44	1.69231
TGAGATTTTAGTGAGGTAAG	44	1.69231
TTTACATACCTGCAGCCTAG	44	1.69231
GCTTTTATAGCCAAACCAAA	44	1.69231
GTCACATAGTTGATGTTCTA	44	1.69231
ACGGAAGCAAACACGAAAAG	44	1.69231
TCCCATTGCCTTAATTGAGA	44	1.69231
GGGAATTTGTAATTTTTCTG	44	1.69231
GAGAGTATTTAAGTGGACAA	44	1.69231
AAATCAGTCAGCTGGGGAAA	44	1.69231
TCTCTAAAATCAGTCAGCTG	44	1.69231
ATCTCTAAAATCAGTCAGCT	44	1.69231
CTGTTGATGGGATTATCTAT	44	1.69231
TGTGTGTTTGGCCGGATGGT	44	1.69231
CGCTGAGGCTTTGGGTATGA	44	1.69231
AGAGAAAGATAGGAGAAACA	44	1.69231
GCAAATGTTTTGCAATTCAT	44	1.69231
AAATAGTTAGTGGGTTAGTC	44	1.69231
TGGGCTATGACGCAGATCTA	44	1.69231
GGGCTATGACGCAGATCTAT	44	1.69231
GCCAGGTACCTGACTGAGTC	44	1.69231
TATCAATATACCACTCATTG	44	1.69231
TGGTAACGTGCTTTCGTCTT	44	1.69231
CTCGTTGATAGAAAGCTTGT	44	1.69231
AAGAAGTCTTTGCCATATGT	44	1.69231
ACTGGAGCAAGTCAAGACAC	44	1.69231
TGGAGCAAGTCAAGACACTG	44	1.69231
TTGACTGTTCCTTGAATAGG	44	1.69231
GGTAATGTTATGATGTTTGA	44	1.69231
GGGAAATTGAGGCTTGGGAT	44	1.69231
GAAGCAAAAGGGGAACTTAT	44	1.69231
TGAAGCAAAAGGGGAACTTA	44	1.69231
GTTAAGGATTTCATTGTTAG	44	1.69231
GGTTAAGGATTTCATTGTTA	44	1.69231
CACAGGTCATTAAATGCAAG	44	1.69231
GGGGCATTTGGCAAGTCAAT	44	1.69231
TGGGGCATTTGGCAAGTCAA	44	1.69231
TATGGTGTGTGAAGTGGGCA	44	1.69231
TTGAAATATGGTGTGTGAAG	44	1.69231
TGAGGTTAGGGTTTTGGAAA	44	1.69231
ACTCAACAATGTGATGCATG	44	1.69231
CAATTTTGGAATGGGCAATG	44	1.69231
AGGGGCTTCAAACATCGAAA	44	1.69231
TAATGTGAAGAGAGCAACTT	44	1.69231
TAGTCACTTTATTCAATTGC	44	1.69231
GGGCGAAACCAACACCGCTA	44	1.69231
AAGGCAAGACTAGTGGCCAG	44	1.69231
TACGTTTTACGCGCGTTAAC	44	1.69231
AGCCATTTCCAAAATCTGTT	44	1.69231
ACTTCCTTTGATTGCTTTCC	44	1.69231
ATTGATGAAGTTGAACTTCT	44	1.69231
CTAATACTATTACATGGCTT	44	1.69231
TTCTTAAACCGAGCGACCGT	44	1.69231
CTTGCTTCAGATGATGATTC	44	1.69231
AACTTAGACAAAGATGAACA	44	1.69231
TACTCCAGTCCACCCAGCCA	44	1.69231
TGTATTGGACATGTTTGGAT	44	1.69231
AGGAGATTACAAGGAGTGTT	44	1.69231
TCTCTCTTTTAAAAATGACG	44	1.69231
GCAGTTTCGCTCAGCGGAGG	44	1.69231
TTCTTCCAAGAGAGTATGTC	44	1.69231
GGGGCGAAAATGGGGCCAGT	44	1.69231
CGCTAAGCCTCCATTATTCG	44	1.69231
GGAGGGCGGTTTCAGTCAAG	44	1.69231
AATTATCTGTCGGGGTAGAA	44	1.69231
TTTTGGTAGCCGCATCTGGA	44	1.69231
AAATTGTAGAACGGATTGAG	44	1.69231
GAGCTGTGTGCTTCACCAGC	44	1.69231
GAATGAGCAGCTTGGTTTAG	44	1.69231
GGCCCAAGCCAAAGCACAAC	44	1.69231
GGCAAGGCAAATCGATTGCA	44	1.69231
CGCAATCTATCGGCGTTAAC	44	1.69231
CCGATTATGACGCTAATGCA	44	1.69231
GTTGTCAACGCACATTACAA	44	1.69231
TTGCAGGTAATCCAGAATGA	44	1.69231
CGGAAAAAATCCGTTGGTAA	44	1.69231
TTGTGCAGTGCAAAAAGTAC	44	1.69231
AGAAAATCTTCCACTGCCGG	44	1.69231
TTCAACTTCTTGGACAAGAA	44	1.69231
ACGCTTTTGATCGTTTGATT	44	1.69231
TACCCCAACTTTGTGAAGAT	44	1.69231
AACAAGTGAAAATGCAAAAC	44	1.69231
GAAACATGCTGTCACGCAAA	44	1.69231
CTGACTTGGTATCTCCTCTC	44	1.69231
AAACAGGCAGTTCTAATACA	44	1.69231
AATTATGATTAAGGGCTTTG	44	1.69231
TCAGCATCCGGCGCATGGCG	44	1.69231
ACTTTGGCTTTATGTTGTAG	44	1.69231
TCCATAGACCAAAGAGAAAG	44	1.69231
CTCTCATAATTCAGCCAATC	44	1.69231
ATCCCATTGAGTACAACGGA	44	1.69231
ATGAAAGAGTGAGGTTTTAG	44	1.69231
TTTCTTCAGAAGATCTGTCG	44	1.69231
ATTTCAAACCAGTTCTCGTC	44	1.69231
ATTAATCCGGATGGTCTTTC	44	1.69231
AAGGTTCTCTTTTTCTCTTT	44	1.69231
CTCTACTACTGTTAGAACAA	44	1.69231
ATCCCTCTGAATCCTTTTCC	44	1.69231
TTAGGTTTAGGCATCAATCT	44	1.69231
GTCATGTTGGAACAAATGAT	44	1.69231
CAGCTTCTAAATGAAGTTTA	44	1.69231
ACTTTTCCTGTCCTACCCTT	44	1.69231
GAGGAGGATGGTTTCGACCA	44	1.69231
AAAGGAGGTATGAGATTTCT	44	1.69231
GAGGTTTCACTTGGCCATTT	44	1.69231
TTTGGGAAGGTAAATGGGTG	44	1.69231
AGGTTTCACTTGGCCATTTT	44	1.69231
GATAATTTTGTGAACAATGG	44	1.69231
ATTTTGTGAACAATGGAGGT	44	1.69231
ATTGCTTACTTTCACATCTT	44	1.69231
TGAAACATGTTCTACCAATA	44	1.69231
TTGAGGTTGCCTTCCACATC	44	1.69231
AGACCATTTGTGGGGGTAGA	44	1.69231
TAGTAGCAGTAATCTTTACT	44	1.69231
GAGATTAGGGAAAGGATGTT	44	1.69231
AGGCACCCCGCCCGTGGCAG	44	1.69231
GAGATAAAAGTATAGTTGCC	44	1.69231
GGATCACGAAAAGCAGTAAT	44	1.69231
TGTTTGCTTGCAGTATATGA	44	1.69231
TGCTGCAGCGCATTTGTCTT	44	1.69231
GACAGCTAAAATGGGAAATA	44	1.69231
AACAAGAACGTCCTAGCACA	44	1.69231
TTTTCGTGTTGTTTCATGAC	44	1.69231
TTTATGTTGATAGTTGACGT	44	1.69231
AACCTACTTCATTTATTGGA	44	1.69231
ACCTACTTCATTTATTGGAT	44	1.69231
ATGGCGTGAGGATTCGAAGT	44	1.69231
TTTGTTCCTCCAGGTGGTAT	44	1.69231
GAGCAATTCTTGAATGAAAT	44	1.69231
TGCGCGCCGCGTCTGCGTCG	44	1.69231
TTAGGCCAAGTGTATCTCCG	44	1.69231
GGGGACCAATAGTCATCATC	44	1.69231
GGGGGAGAGTCATATTTTCA	44	1.69231
TAGTTCCTCTTCATTTGCAA	44	1.69231
TGAGGGATGCCAAGTGTGTT	44	1.69231
TTTTTCACACTTGCACCTTT	44	1.69231
ATTGGTTTCGCTGGTATGAG	44	1.69231
GAGGTGGAAGAGGTTTAAGC	44	1.69231
ACCCTAATTTCGGTCGAACT	44	1.69231
TATTCCAACGGATCTTTTGA	44	1.69231
ACTTCTTCTCAAAGTGTTTC	44	1.69231
GAGCGTACGTGGTGAGGATT	44	1.69231
ACATTTCTACTTGGGATGAC	44	1.69231
CGAGATTCAAGTTCGGGAGT	44	1.69231
GAAGAGTGTAAAGGTAGGGT	44	1.69231
ATTTCAAGGAAGTTTTGTGT	44	1.69231
AGGTATCTTCAATTATGAGT	44	1.69231
ACAACAACACCTACGTTTGG	44	1.69231
GATTTGATTGTGAAAAAGGA	44	1.69231
GCCTCTTGATTAATGTCTCG	44	1.69231
GCATTTGGATGATGGGCAGA	44	1.69231
TGCCCCGATAAATCCAAAAG	44	1.69231
CTGTTGGGAATTTGGTGATG	44	1.69231
GATTCAAATCTGAATTACGA	44	1.69231
ATCTTGGAATTTTTGGAAAG	44	1.69231
GGTACAGGGGGTCGTGGTCT	44	1.69231
AGTGAGTTCTAAGGGTGTTT	44	1.69231
GACTTGGAGAGGGGGAAAAT	44	1.69231
TCAAAAATAGGTGACGTTTC	44	1.69231
GAGCTGTAAGGCACTGGGCC	44	1.69231
TATTTGGCAACGAGCATATT	44	1.69231
CATCCAAGCATGACAACAGT	44	1.69231
AGCTCTACGCGAATCAGCCA	44	1.69231
GCAGTTACGGAAGTATGTTC	44	1.69231
CATTGAAAGCAACTGTAGCA	44	1.69231
TCCTTATCAAAGATCGATAG	44	1.69231
TGGTGAGGTACAGAGGAGTG	44	1.69231
CCATGTAATTTTCTGACACC	44	1.69231
CCGGGTGTCAGAAAATTACA	44	1.69231
TTACATTTGGCATTCATGCA	44	1.69231
AGGGCCTGGGATTCGAACCC	44	1.69231
TTGGAGAAACGGGGAGAAGA	44	1.69231
AGCTTTCGGTAGATTCGAGT	44	1.69231
GGCGTGGTGTTTGTGTGGTA	44	1.69231
AGCAATGTTAAGGTATCATA	44	1.69231
ATGTTATGGGCATTTGGCTG	44	1.69231
GAAGATTTTGAAGAGTCACT	44	1.69231
AACTTGGGACAGCTGAGTGG	44	1.69231
GAATGGAAATTGGGAAATTG	44	1.69231
ACGTGGCCTTGTGCTATTTG	44	1.69231
TTTTGACAGGCTGAATTCTA	44	1.69231
TGGATCTGATTGGTCATGAG	44	1.69231
GCGTATCATCCTCAGACCGA	44	1.69231
TTGTGTTATGGGCATTTGGT	44	1.69231
GGGTATTCCCTTTTAATCAG	44	1.69231
TGCTTCGGTGTTCTCAGAAG	44	1.69231
GCTTTGCGCCTGCATTATCT	44	1.69231
TACGGGGAATTGGCATTTCT	44	1.69231
AACTGGTTCTATAACCTTGA	44	1.69231
GGCGTCTTTCATCAACAATT	44	1.69231
ATCTGTCCAATTTGTGAACT	44	1.69231
TGGTGACAAGGTCGAAAAGT	44	1.69231
TATGCGTTAATTAACTGTTG	44	1.69231
TGGATTTTGATGGTTTTCAA	44	1.69231
GGATTTTGATGGTTTTCAAA	44	1.69231
TGTCAAAGTTATGGAAGCAT	44	1.69231
GAGGAAATGATAAGAAGCAT	44	1.69231
ACATGTTATATGTGAAGTGT	44	1.69231
AGGAGTTTTGGAGATTAAAA	44	1.69231
TGGAATGTGATGATCAATGG	44	1.69231
GCTCTGACCCACTGAAGATA	44	1.69231
CTGCGAACAGCAACGCAGTT	44	1.69231
GTGGCTGTATTGGGGGATTT	44	1.69231
CGAACTTCCCTTTTCACTAC	44	1.69231
GGGGAGTCATCAAAGTAACA	44	1.69231
CCCCAATGAGATCCGGGTTC	44	1.69231
TCACTCACTCCGATATTGTG	44	1.69231
GGACAAAGATCAAATATACT	44	1.69231
AGTGAAATGGCCTTCTGGCT	44	1.69231
TAGTGAAATGGCCTTCTGGC	44	1.69231
TTTCCTTAGTAACTTGAAGA	44	1.69231
GTTGAACACTAGCATGCACT	44	1.69231
GATGGGCAGATGGTTAGGCA	44	1.69231
ATGACCCTTTAGGCTTCTTT	44	1.69231
TTGTGGTGAAATGGTGATTG	44	1.69231
ATATGGCAAAGATGTTGGAA	44	1.69231
ATATGATATGGCAAAGATGT	44	1.69231
TCACCAATGTCCCAACAGCC	44	1.69231
GGTCTGTTAAAGAGGAGTTT	44	1.69231
GAGATTTCTTGGGACAGTTG	44	1.69231
TTTTAGCAAACGTGACTAAA	44	1.69231
TACCATATGAATCATGGGCA	44	1.69231
TACCCTGCCCATGATTCATA	44	1.69231
AATGGAACTGTGTCAGCAAT	44	1.69231
TTGATTCTGGGATGATGAGA	44	1.69231
GTTGATTCTGGGATGATGAG	44	1.69231
GAAAGTGATACAATCGCACG	44	1.69231
TAAGAATCGAAGGCTGTATG	44	1.69231
TGTTTTTGTCCCCATTTGAC	44	1.69231
GCCCGTTAGACCAATTTACT	44	1.69231
ATAGGCTGACACATAAGCAT	44	1.69231
TCGAATACAGAGGACTGTTC	44	1.69231
ATGTTTTTGGCCGACAGCAT	44	1.69231
TGTTTCCAATGATGTTCAAG	44	1.69231
GGAAGTAATTGATTTTTGCT	44	1.69231
GACCTAAAGCGACGGTTCAA	44	1.69231
ATATGTCTTGATTCGGGGTA	44	1.69231
TATGTCTTGATTCGGGGTAT	44	1.69231
TCACATTTGGTACCAGACAC	44	1.69231
AGATTATAGGTCATTTTTGG	44	1.69231
AACTCTTTGGGGAAGCAAAG	44	1.69231
TCACACTTAATACAGCCGAA	44	1.69231
GTAGAATTAGGGTTAATCAA	44	1.69231
CAACTTACAGTAGCTCCTGG	44	1.69231
CGTAAATCAGAAGCGCGAAC	44	1.69231
TGGGTTTTTCCTTTGTTCAA	44	1.69231
ACTGGCGAACGTGTTGAAAA	44	1.69231
TTCGGTCGACGAAACGACAC	44	1.69231
TGTTTTCGTGGCTGTAGCAG	44	1.69231
TTTTCGACAGCTTTGTCTGG	44	1.69231
GTCTTTTCAAAGTCCTTGGT	44	1.69231
GGGGATTACTTTTCCTGCTT	44	1.69231
GGTATCAGAAGGTCCTCTCA	44	1.69231
TTTACCCCATATTGATGTCC	44	1.69231
TCGACATGAACTTTCTCGAC	44	1.69231
TGGCCTTGAAGTACGTTGCA	44	1.69231
TTGAAAGGTTTGAAACTTTG	44	1.69231
AGGAGGAGCTATTGTGATCA	44	1.69231
ATAAACGATAGAATGTCGAA	44	1.69231
AATCATTTCATGACAGTTGG	44	1.69231
GAGTACGAAGCCTGTATAAT	44	1.69231
TAGCAAACACTATCCTAGAT	44	1.69231
TATGGGACATGTTTGATGTT	44	1.69231
AGCTGAAATTGATTAACTTG	44	1.69231
AGCTCTAAGGTAAATGGATG	44	1.69231
CTAACTCAAATGAAGCTAAC	44	1.69231
GTGGAAGCTTCTCCACCACT	44	1.69231
TATCGGTTTTGTGCCTCCCC	44	1.69231
GGGGCTAGCTGTCAGATTTG	44	1.69231
GATTTTCTTGTGGACAATGG	44	1.69231
GAATGAGATTTGAGGTTTTG	44	1.69231
AGATAAGTTTGTAGTTCGGA	44	1.69231
AAAGAAAAATCGATGGAACA	44	1.69231
GGAAAAATGATGTGTAAGCT	44	1.69231
AAGGCTTGGAAACTGATCAT	44	1.69231
AGGTGGTTTGATGATGGTAT	44	1.69231
TAAGGATATCCCTACGTTCG	44	1.69231
TCCAAGTGCACTAGAGGCAT	44	1.69231
TTTGATCAAAAGGCGGATAA	44	1.69231
TGGGACACAAGTGAGGTGTT	44	1.69231
TTAATGATCGTCTGAGATCG	44	1.69231
AGACTAGTATCGAATAATGT	44	1.69231
TCAAAGAGGTAATATCCGTT	44	1.69231
CAAATAACGTTTGATGGGTT	44	1.69231
[truncated: 56,244 more rows]

## Sheet: Guide Pool 8
gRNA target sequence	number of targets	Relative frequency
[truncated: 60,000 more rows]

[truncated: 3 more sheets: Guide Pool 9, Guide Pool 10, Guide Pool 11]
